# Supplementary material for: Genetic overlap and shared risk loci between autism spectrum disorder and cardiometabolic traits
Source: Research Square preprint supplement (doi:10.21203/rs.3.rs-7130451/v1), 2025-09-01
Supplement: Supplementary file 1 [file 24a3cc7bcca49f2ddabe5f4a.xlsx]

## Sheet: Table S1
GWAS	Sample size (N)	reference
Autism Spectrum Disorder	18,381 cases; 27,969 HC	(Grove et al. 2019)
Body Mass Index	795,640	(Yengo et al. 2018)
Total cholesterol	~216,000	(Klarin et al. 2018)
High Density Lipoprotein	~216,000	(Klarin et al. 2018)
Pulse pressure	745,820	(Evangelou et al. 2018)
Systolic Blood Pressure	745,820	(Evangelou et al. 2018)
Diastolic Blood Pressure	757,601	(Evangelou et al. 2018)
Type II diabetes	80.154 cases; 853,816 HC	(Mahajan et al. 2022)
Coronary Artery Disease	71,602 cases; 260,875 HC	(Nelson et al. 2017)

## Sheet: Table S2
trait	pi (mean)	pi (std)	sig2_beta (mean)	sig2_beta (std)	sig2_zero (mean)	sig2_zero (std)	h2 (mean)	h2 (std)	nc@p9 (mean)	nc@p9 (std)	AIC	BIC
ASD	0.00379085	0.00044095	2.51344e-05	3.02186e-06	1.03868	0.00297648	0.194938	0.00470903	12089.5	1406.24	2.26887	-7.25603
BMI	0.00344152	0.00014285	3.144e-05	1.27899e-06	1.47962	0.00644002	0.224065	0.00242568	10975.4	455.566	2204.69	2214.37
DBP	0.00124701	2.33e-05	6.12e-05	1.16e-06	1.26785	0.00136838	0.158303	0.00104605	3976.85	74.431	7007.61	7017.98
CAD	0.000432145	2.63e-05	4.42e-05	2.16e-06	0.883018	0.00063707	0.0394897	0.00083543	1378.16	83.7658	635.209	645.858
HDL	0.00011572	8.96894e-06	0.000623655	5.6945e-05	1.1513	0.000744523	0.148669	0.00254367	369.045	28.603	6401.12	6412.02
PP	0.0011436	1.98e-05	5.46e-05	9.6e-07	1.24498	0.00103905	0.129566	0.000700363	3647.09	63.1281	5419.21	5429.53
SBP	0.00138331	2.4e-05	5.51e-05	8.85e-07	1.28002	0.00119633	0.1581	0.000826763	4411.54	76.3972	5939.7	5950.03
T2DM	0.000807483	0.00011184	9.4e-05	1.79e-05	1.05942	0.00298167	0.153451	0.00293491	2575.16	356.669	2998.83	3009.7
TC	6.97e-05	3.99e-06	0.000805441	5.01e-05	1.09267	0.000417955	0.116032	0.0023457	222.214	12.7191	6118.81	6129.63

## Sheet: Table S3
fname	trait1	trait2	dice (mean)	dice (std)	pi1 (mean)	pi1 (std)	pi2 (mean)	pi2 (std)	pi12 (mean)	pi12 (std)	nc1@p9 (mean)	nc1@p9 (std)	nc2@p9 (mean)	nc2@p9 (std)	nc12@p9 (mean)	nc12@p9 (std)	rho_zero (mean)	rho_zero (std)	rg-shared (mean)	rg-shared (std)	rg (mean)	rg (std)	fraction_concordant_within_shared (mean)	fraction_concordant_within_shared (std)	best_vs_min_AIC	best_vs_min_BIC	best_vs_max_AIC	best_vs_max_BIC
ASD_vs_BMI.fit.json	ASD	BMI	0.755384	0.122971	0.00106978	0.000482085	0.000694787	0.000503561	0.00274674	0.000497614	3411.64	1537.42	2215.76	1605.91	8759.67	1586.95	0.0138693	0.0039225	0.0305394	0.0234336	0.0227718	0.0162454	0.509725	0.00746391	16.6893	7.72593	2.67648	-6.2869
ASD_vs_BP.fit.json	ASD	DBP	0.352326	0.0784908	0.00290651	0.000323912	0.000349277	0.000250415	0.000897729	0.000244889	9269.2	1032.99	1113.89	798.602	2862.96	780.979	0.000837419	0.00218155	-0.227991	0.0696183	-0.0872711	0.00800669	0.426563	0.0230754	8.35017	-1.10311	4.18512	-5.26816
ASD_vs_CAD.fit.json	ASD	CAD	0.0638974	0.0142499	0.00366115	0.000451551	0.000297932	3.77948e-05	0.000134213	3.0216e-05	11675.8	1440.05	950.141	120.532	428.02	96.3624	0.00595402	0.00189158	-0.90156	0.107189	-0.0929195	0.0133641	0.128655	0.0646769	0.337842	-9.16263	4.25787	-5.2426
ASD_vs_HDL.fit.json	ASD	HDL	0.0426804	0.0107637	0.00370765	0.000433172	3.25188e-05	2.53187e-05	8.32012e-05	2.1866e-05	11824.1	1381.43	103.706	80.7442	265.338	69.7333	0.00178699	0.00209336	-0.747429	0.195672	-0.0883856	0.0104367	0.209914	0.105225	7.55488	-1.92113	7.11096	-2.36505
ASD_vs_PP.fit.json	ASD	PP	0.426919	0.0540432	0.00274538	0.000450326	9.81e-05	0.000101111	0.00104547	9.95e-05	8755.33	1436.14	312.964	322.455	3334.12	317.269	-0.00470295	0.00206201	-0.250038	0.0373464	-0.124372	0.0084306	0.419491	0.0123637	9.78149	0.337763	1.29665	-8.14708
ASD_vs_SBP.fit.json	ASD	SBP	0.492232	0.051491	0.00252244	0.000412892	0.000114909	0.000122492	0.0012684	0.000119253	8044.37	1316.76	366.457	390.643	4045.09	380.313	-0.00346708	0.00186578	-0.218986	0.0235211	-0.120711	0.00825886	0.429704	0.00769013	14.749	5.3053	1.84719	-7.59656
ASD_vs_T2DM.fit.json	ASD	T2DM	0.19698	0.104437	0.00333316	0.000416751	0.000349798	0.000248959	0.000457684	0.000251916	10629.8	1329.07	1115.55	793.958	1459.61	803.391	0.00390489	0.00252237	0.236505	0.207299	0.0405597	0.012551	0.580148	0.0786448	11.6038	2.11865	8.898	-0.58714
ASD_vs_TC.fit.json	ASD	TC	0.0243927	0.00758406	0.0037445	0.000442556	2.33276e-05	1.1819e-05	4.63512e-05	1.31794e-05	11941.6	1411.36	74.3944	37.6921	147.819	42.0306	-0.000568128	0.00215965	0.78478	0.183184	0.0680493	0.0144503	0.808165	0.0994168	3.34539	-6.04467	4.67477	-4.7153

## Sheet: Table S4
Trait	locusnum	CHR	LEAD BP	LEAD SNP	MinBP	MaxBP	conjFDR	is_locus_lead	zscore_ASD	zscore_CVD trait	direction	new ASD hit
BMI	1	1	96603035	rs12130426	96597055	96604986	0.00709205	True	-4.40059	-5.37525	positive	0
BMI	19	11	131981029	rs7112357	131920067	131994544	0.046622	True	3.943	2.92064	positive	0
BMI	20	17	65988049	rs9891146	65800140	66097802	0.0375482	True	3.8739	5.10596	positive	0
BMI	3	2	104227869	rs6543223	104056454	104387855	0.0215238	True	4.07806	-4.45361	negative	0
BMI	4	2	142339047	rs17734594	142216965	142441655	0.04119	True	-3.9593	-3.00222	positive	0
BMI	5	2	159388986	rs2883872	159310846	159539677	0.0128334	True	-4.25746	-3.37694	positive	0
BMI	2	2	63891261	rs262517	63426223	63913711	0.0205574	True	-4.13327	3.19602	negative	0
BMI	21	20	54181875	rs6092143	54145086	54181875	0.0391892	True	3.85648	3.68324	positive	0
BMI	7	3	158152073	rs11707386	157828781	158279748	0.0208062	True	-4.08928	3.36718	negative	0
BMI	6	3	62481063	rs1452075	62471086	62518227	0.000514012	True	-4.97527	-5.1811	positive	0
BMI	8	4	103607806	rs227285	103603949	103675108	0.0401432	True	-3.84632	-3.55914	positive	0
BMI	9	4	171178771	rs2139816	171075746	171207036	0.0449883	True	-4.14148	2.87524	negative	0
BMI	11	5	103933473	rs2447832	103791044	104055261	0.00574028	True	4.53332	3.66056	positive	0
BMI	12	5	113874012	rs392585	113837198	114021206	0.0263063	True	-4.00857	3.40501	negative	0
BMI	10	5	92546237	rs4242244	92488009	92574385	0.0488353	True	-3.76129	-4.05699	positive	0
BMI	13	6	23908557	rs12194004	23833807	23908557	0.0289212	True	3.97471	-3.41813	negative	0
BMI	14	6	98582900	rs12206087	98547979	98591622	0.00297946	True	-4.60859	4.92463	negative	0
BMI	15	7	24530016	rs976681	24526039	24536700	0.0237997	True	4.04375	-3.50898	negative	0
BMI	16	8	10625045	rs7350124	8088230	11463015	0.00198951	True	4.69839	-3.99979	negative	0
BMI	17	8	142629949	rs7357604	142611220	142651709	0.0111105	True	-4.27982	4.02736	negative	0
BMI	18	9	31030360	rs12347982	30982465	31100423	0.0169003	True	-4.15549	3.95087	negative	0
DBP	17	12	133781163	rs36174733	133688707	133781163	0.0296682	True	4.07032	-4.57277	negative	1
DBP	18	14	94838142	rs112635299	94838142	94844947	0.0108631	True	4.98726	-3.50887	negative	0
DBP	19	15	85423857	rs12917054	85403496	85433458	0.0237572	True	-4.14584	4.25099	negative	0
DBP	20	17	44293205	rs2696609	43463493	44865603	0.00362108	True	4.68048	-5.13415	negative	0
DBP	21	18	55881771	rs479865	55853897	55898199	0.00334266	True	4.69941	4.26596	positive	0
DBP	2	2	140324444	rs35835668	140195272	140476040	0.0188916	True	-4.22022	3.33886	negative	0
DBP	3	2	159388986	rs2883872	159310846	159539677	0.0133592	True	-4.32801	-3.74411	positive	0
DBP	1	2	63898428	rs2604615	63426223	63913711	0.0358814	True	-4.24018	-3.09179	positive	0
DBP	22	20	21302327	rs1546996	21124872	21478372	0.0120755	True	5.05466	3.47346	positive	0
DBP	23	21	35020161	rs8134847	34861921	35020161	0.0377871	True	3.98456	4.36628	positive	0
DBP	4	3	158152073	rs11707386	157828781	158279748	0.022935	True	-4.15704	5.10208	negative	0
DBP	5	4	103618023	rs227375	103567348	103956956	0.0259567	True	-4.11576	-5.96324	positive	0
DBP	7	5	113845984	rs434517	113837198	113995764	0.0305926	True	-4.13912	3.15121	negative	0
DBP	8	5	127657056	rs463035	127657056	127857493	0.0262296	True	-4.11202	4.05973	negative	0
DBP	6	5	77766019	rs11750781	77645265	77815461	0.0294151	True	4.07337	-3.63526	negative	0
DBP	12	6	142866387	rs611802	142648056	142866387	0.044749	True	-3.92227	-3.98436	positive	1
DBP	9	6	16753147	rs16879023	16710967	16758425	0.004024	True	-4.6541	-4.38528	positive	0
DBP	10	6	29583846	rs28749528	29574476	29608694	0.0159787	True	4.61817	3.38078	positive	1
DBP	11	6	98555272	rs9375188	98547979	98591622	0.0226528	True	-4.58135	3.26007	negative	0
DBP	13	7	18438521	rs150833979	18395176	18442949	0.0499345	True	4.11129	-2.96731	negative	1
DBP	14	8	10573702	rs7820334	8119248	11463015	0.000202524	True	5.28944	-4.97961	negative	0
DBP	15	8	53356959	rs391557	53332425	53408414	0.0175834	True	-4.24355	-3.99566	positive	0
DBP	16	8	82796272	rs10481273	82688246	82857264	0.0410659	True	3.95375	5.41451	positive	0
SBP	17	10	18563985	rs1277731	18539462	18572508	0.0474828	True	-3.87147	3.46109	negative	1
SBP	18	12	133781163	rs36174733	133688707	133781163	0.0274577	True	4.07159	-4.09727	negative	1
SBP	19	13	78905831	rs9544774	78821529	78971323	0.0257516	True	4.11769	-3.22913	negative	0
SBP	20	14	94838142	rs112635299	94672731	94844947	0.000872603	True	4.98882	-4.42376	negative	0
SBP	21	17	44293205	rs2696609	43463493	44865603	0.00341759	True	4.68194	-5.83258	negative	0
SBP	22	17	65990500	rs56305452	65824046	66098154	0.0282139	True	4.06173	-3.91839	negative	0
SBP	23	18	55881771	rs479865	55853897	55898199	0.00315471	True	4.70087	4.19858	positive	0
SBP	2	2	140324444	rs35835668	140195272	140476040	0.017535	True	-4.22153	4.06098	negative	0
SBP	1	2	63898428	rs2604615	63426223	63913711	0.0165023	True	-4.2415	-3.43795	positive	0
SBP	24	20	21281988	rs3761287	21233198	21485513	0.0139819	True	4.43368	3.41185	positive	0
SBP	25	21	35020161	rs8134847	34861921	35020161	0.0349519	True	3.9858	3.61289	positive	0
SBP	5	3	158152073	rs11707386	157828781	158279748	0.0212461	True	-4.15833	5.08001	negative	0
SBP	3	3	49200137	rs1134043	48770281	49749976	0.046599	True	3.92059	3.1778	positive	0
SBP	4	3	70255465	rs73116288	70252572	70296251	0.0274577	True	4.07159	-4.01369	negative	0
SBP	6	4	2781240	rs6422311	2768387	2781447	0.0279731	True	-4.06487	3.60343	negative	0
SBP	7	5	104006667	rs325500	103791044	104082179	0.00196539	True	4.83915	-4.02733	negative	0
SBP	8	5	114019748	rs285901	113837198	114422179	0.0200204	True	-4.17863	3.681	negative	0
SBP	9	5	127818890	rs13162269	127801058	127857493	0.045326	True	-3.88854	7.43844	negative	0
SBP	10	6	16742925	rs1144696	16710967	16758425	0.01626	True	-4.24617	-3.40429	positive	0
SBP	11	6	18984596	rs4716324	18913380	19109294	0.0465291	True	3.87903	-3.33119	negative	0
SBP	12	6	98562720	rs9375195	98547979	98591622	0.0206049	True	-4.18216	3.27546	negative	0
SBP	16	8	102847128	rs2155940	102757768	102916321	0.0487888	True	-3.89925	-3.18581	positive	1
SBP	13	8	10583506	rs4841432	8119248	11463015	0.000151558	True	5.33285	-5.11669	negative	0
SBP	14	8	53386046	rs2613267	53333088	53406893	0.0275158	True	-4.07083	-3.29256	positive	0
SBP	15	8	82796272	rs10481273	82688246	82857264	0.0379957	True	3.95498	5.05864	positive	0
T2DM	5	12	133781163	rs36174733	133688707	133781163	0.0271384	True	4.08532	-4.02945	negative	1
T2DM	6	14	94838142	rs112635299	94838142	94844947	0.0132674	True	5.00564	-3.77364	negative	0
T2DM	7	17	65990500	rs56305452	65824046	66098154	0.0280407	True	4.07542	5.06766	positive	0
T2DM	8	20	54239282	rs1337243	54238665	54241055	0.0294431	True	4.07245	3.49469	positive	0
T2DM	1	4	103618023	rs227375	103567348	103956956	0.0232397	True	-4.13093	-4.43341	positive	0
T2DM	2	5	103995368	rs325485	103791044	104055261	0.0207931	True	4.99333	3.62014	positive	0
T2DM	3	6	98562720	rs9375195	98547979	98591622	0.0216127	True	-4.19626	3.60576	negative	0
T2DM	4	8	10612925	rs4840514	8310508	11463015	0.000712422	True	4.9256	-5.01266	negative	0
TC	2	14	94838142	rs112635299	94672731	94844947	0.000808862	True	5.00941	4.68795	positive	0
TC	3	17	65990500	rs56305452	65824046	66098154	0.03226	True	4.07849	3.74771	positive	0
TC	1	2	202220623	rs6435081	202122995	202241907	0.0128258	True	4.24489	-4.04423	negative	0
CAD	1	14	94838142	rs112635299	94838142	94844947	0.00199771	True	5.00648	-4.55779	negative	0
PP	10	13	78905831	rs9544774	78821529	78971323	0.0289701	True	4.11736	-3.25921	negative	0
PP	11	14	94838142	rs112635299	94838142	94844947	0.0148367	True	4.98841	-3.52786	negative	0
PP	12	17	44293205	rs2696609	43463493	44865603	0.00357185	True	4.68156	-4.35726	negative	0
PP	13	17	65990500	rs56305452	65824046	66098154	0.0330216	True	4.0614	-4.0233	negative	0
PP	14	18	55888468	rs292453	55855025	55898199	0.0435833	True	4.4743	3.08812	positive	0
PP	1	2	140324444	rs35835668	140195272	140476040	0.019802	True	-4.22119	3.52625	negative	0
PP	2	3	70255465	rs73116288	70252572	70296251	0.0320748	True	4.07126	-4.25895	negative	0
PP	4	4	103618023	rs227375	103567348	103956956	0.0353663	True	-4.11671	3.17661	negative	0
PP	3	4	2781240	rs6422311	2768387	2781447	0.0327201	True	-4.06454	4.4452	negative	0
PP	5	5	104006667	rs325500	103682279	104082179	0.00311636	True	4.83875	-4.07837	negative	0
PP	6	5	114019748	rs285901	113837198	114422179	0.0254589	True	-4.17829	3.31173	negative	0
PP	8	6	135044376	rs9376056	135035609	135044642	0.0253019	True	4.41473	-3.31431	negative	0
PP	7	6	19161875	rs12528805	19053843	19161875	0.0397494	True	3.99974	-3.98072	negative	0
PP	9	8	10583506	rs4841432	8119248	11463015	0.00131372	True	5.33242	-4.3206	negative	0
HDL	5	17	65990500	rs56305452	65824046	66098154	0.034124	True	4.07799	-4.15231	negative	0
HDL	1	3	62471086	rs6774533	62462818	62492172	0.00658341	True	-4.77026	4.14186	negative	0
HDL	2	6	98585502	rs17814604	98585502	98585502	0.0437347	True	4.41466	3.59077	positive	0
HDL	3	7	24526039	rs6461809	24526039	24536700	0.0435699	True	4.23742	3.59197	positive	0
HDL	4	8	10612925	rs4840514	10552456	10730558	0.0233577	True	4.92871	3.78869	positive	0

## Sheet: Table S5
GWAS Catalog GeneSet	N_genes	N_overlap	p	adjP	genes
Processed meat consumption	32	12	1.87e-25	8.27e-22	CADPS, MFHAS1, ERI1, MSRA, SOX7, XKR6, MTMR9, FAM167A, BLK, NEIL2, FDFT1, CTSB
General factor of neuroticism	70	12	8.35e-21	1.85e-17	WDPCP, CLDN23, MFHAS1, ERI1, MSRA, SOX7, PINX1, XKR6, MTMR9, FAM167A, BLK, FDFT1
Fish- and plant-related diet	180	12	1.12e-15	1.65e-12	CLDN23, MFHAS1, ERI1, MSRA, SOX7, PINX1, XKR6, MTMR9, FAM167A, BLK, FDFT1, CTSB
Systolic blood pressure x smoking status (ever vs never) interaction (2df test)	83	9	6.44e-14	7.12e-11	RSRC1, MFHAS1, ERI1, MSRA, SOX7, PINX1, C8orf12, FAM167A, BLK
Systolic blood pressure x smoking status (current vs non-current) interaction (2df test)	98	9	3.02e-13	2.67e-10	RSRC1, MFHAS1, ERI1, MSRA, SOX7, PINX1, C8orf12, FAM167A, BLK
Asthma and attention deficit hyperactivity disorder	9	5	3.13e-12	2.31e-9	WDPCP, MDH1, MANBA, UBE2D3, CISD2
A body shape index	361	12	4.46e-12	2.82e-9	CLDN23, MFHAS1, ERI1, MSRA, SOX7, PINX1, XKR6, FAM167A, BLK, NEIL2, FDFT1, CTSB
Brain morphology (MOSTest)	1049	17	7.30e-12	4.04e-9	CADPS, CLDN23, MFHAS1, ERI1, MSRA, SOX7, PINX1, XKR6, MTMR9, FAM167A, BLK, NEIL2, FDFT1, CTSB, BPTF, C17orf58, KPNA2
Waist-hip index	518	13	1.70e-11	8.38e-9	CLDN23, MFHAS1, ERI1, MSRA, SOX7, PINX1, XKR6, MTMR9, FAM167A, BLK, NEIL2, FDFT1, CTSB
Waist circumference adjusted for body mass index	658	14	2.22e-11	9.84e-9	WDPCP, CLDN23, MFHAS1, ERI1, MSRA, SOX7, PINX1, XKR6, MTMR9, FAM167A, BLK, FDFT1, CTSB, BPTF
General risk tolerance (MTAG)	224	9	5.30e-10	2.13e-7	WDPCP, CLDN23, MFHAS1, MSRA, PINX1, XKR6, BLK, CTSB, KPNA2
Diastolic blood pressure x smoking status (ever vs never) interaction (2df test)	79	6	1.11e-8	4.10e-6	RSRC1, MFHAS1, ERI1, MSRA, SOX7, PINX1
Diastolic blood pressure x smoking status (current vs non-current) interaction (2df test)	89	6	2.29e-8	7.79e-6	RSRC1, MFHAS1, ERI1, MSRA, SOX7, PINX1
Retinal vascular caliber	17	4	3.21e-8	1.01e-5	SOX7, PINX1, XKR6, MTMR9
Bone ultrasound measurement (broadband ultrasound attenuation)	19	4	5.21e-8	1.54e-5	CLDN23, MFHAS1, XKR6, MTMR9
Neuroticism	119	6	1.31e-7	3.61e-5	SHOX2, RSRC1, CLDN23, MFHAS1, ERI1, XKR6
Waist-to-hip ratio adjusted for BMI	747	11	1.83e-7	4.77e-5	MFHAS1, ERI1, MSRA, SOX7, PINX1, XKR6, MTMR9, FAM167A, BLK, NEIL2, FDFT1
Refractive error	1389	14	3.09e-7	7.60e-5	CLDN23, MFHAS1, ERI1, MSRA, SOX7, XKR6, MTMR9, FAM167A, BLK, FDFT1, CTSB, NTM, BPTF, KPNA2
Systemic lupus erythematosus	361	8	5.17e-7	1.20e-4	MFHAS1, MSRA, PINX1, XKR6, MTMR9, TDH, FAM167A, BLK
Regular attendance at a religious group	68	4	1.02e-5	2.25e-3	WDPCP, BPTF, C17orf58, KPNA2
Depression	72	4	1.28e-5	2.70e-3	WDPCP, RSRC1, MSRA, BLK
Systolic blood pressure x alcohol consumption interaction (2df test)	73	4	1.35e-5	2.72e-3	MSRA, PINX1, XKR6, C8orf12
Autism spectrum disorder	30	3	2.88e-5	5.54e-3	CADPS, SOX7, PINX1
Systolic blood pressure x alcohol consumption (light vs heavy) interaction (2df test)	31	3	3.19e-5	5.87e-3	MSRA, XKR6, FAM167A
Number of sexual partners	93	4	3.52e-5	6.23e-3	WDPCP, SOX7, BLK, C17orf58
Bipolar disorder (early vs late onset)	5	2	3.85e-5	6.56e-3	MFHAS1, ERI1
Estimated glomerular filtration rate	482	7	4.38e-5	7.18e-3	MANBA, CISD2, SLC9B2, MFHAS1, MSRA, XKR6, BLK
Remission after SSRI treatment in MDD or neuroticism	6	2	5.77e-5	9.12e-3	MSRA, XKR6
Barrett's esophagus	7	2	8.07e-5	1.23e-2	MSRA, BLK
Type 2 diabetes	555	7	1.06e-4	1.56e-2	CISD2, SLC9B2, MSRA, PINX1, XKR6, BPTF, C17orf58
Body size at age 10	252	5	1.41e-4	2.02e-2	CADPS, CLDN23, MSRA, XKR6, NTM
Polymyositis	10	2	1.72e-4	2.38e-2	FAM167A, BLK
Anxiety/tension (special factor of neuroticism)	11	2	2.10e-4	2.82e-2	SOX7, PINX1
Loneliness (MTAG)	63	3	2.69e-4	3.50e-2	BPTF, C17orf58, KPNA2
Adult body size	481	6	3.66e-4	4.52e-2	CADPS, RSRC1, MSRA, BLK, NTM, BPTF
Medication use (calcium channel blockers)	70	3	3.67e-4	4.52e-2	MFHAS1, PINX1, NEIL2
Head circumference (infant)	4	2	4.13431e-05	0.0048143	CRHR1:MAPT
Systemic lupus erythematosus	361	7	4.70333e-05	0.00520305	FBN2:MFHAS1:PINX1:XKR6:MTMR9:TDH:ARHGAP27
A body shape index	361	7	4.70333e-05	0.00520305	MFHAS1:SOX7:PINX1:XKR6:ARHGAP27:CRHR1:MAPT
Diastolic blood pressure x smoking status (ever vs never) interaction (2df test)	79	4	5.80591e-05	0.00626613	RSRC1:MFHAS1:SOX7:PINX1
Alzheimer's disease in APOE e4- carriers	33	3	9.15097e-05	0.00951857	CRHR1:MAPT:WNT3
Diastolic blood pressure x smoking status (current vs non-current) interaction (2df test)	89	4	9.24968e-05	0.00951857	RSRC1:MFHAS1:SOX7:PINX1
Remission after SSRI treatment in MDD or neuroticism	6	2	0.000103004	0.0101288	XKR6:PLEKHM1
Physical activity (overall physical activity time)	6	2	0.000103004	0.0101288	CRHR1:KANSL1-AS1
Number of sexual partners	93	4	0.000109736	0.0105561	WDPCP:SOX7:STH:C17orf58
White matter integrity (mean diffusivity)	7	2	0.00014396	0.0135536	CRHR1:MAPT
Waist-to-hip ratio adjusted for BMI	747	9	0.000148572	0.0136965	MFHAS1:SOX7:PINX1:XKR6:MTMR9:ARHGAP27:CRHR1:MAPT:WNT3
General risk tolerance (MTAG)	224	5	0.000320827	0.0289726	WDPCP:MFHAS1:PINX1:XKR6:ST18
Anxiety/tension (special factor of neuroticism)	11	2	0.000374465	0.0331402	SOX7:PINX1
Household income (MTAG)	141	4	0.000539252	0.046788	USP4:RNF123:CRHR1:MAPT

## Sheet: Table S6
GWAS Catalog GeneSet	N_genes	N_overlap	p	adjP	genes
Brain morphology (MOSTest)	1049	47	4.21e-39	1.86e-35	CELSR3, NCKIPSD, PRKAR2A, ARIH2, P4HTM, WDR6, DALRD3, IMPDH2, QRICH1, USP19, LAMB2, CCDC71, KLHDC8B, C3orf84, USP4, APEH, RNF123, AMIGO3, GMPPB, RBM6, FBN2, TRIM27, GABBR1, CLDN23, MFHAS1, ERI1, MSRA, SOX7, PINX1, XKR6, MTMR9, FAM167A, BLK, NEIL2, FDFT1, CTSB, ARHGAP27, PLEKHM1, CRHR1, SPPL2C, MAPT, STH, ARL17B, LRRC37A, LRRC37A2, ARL17A, WNT3, BPTF, C17orf58, KPNA2
General factor of neuroticism	70	17	1.28e-26	2.84e-23	WDPCP, QRICH1, CLDN23, MFHAS1, ERI1, MSRA, SOX7, PINX1, XKR6, MTMR9, FAM167A, BLK, FDFT1, ARHGAP27, CRHR1, MAPT, WNT3
Processed meat consumption	32	11	1.81e-19	2.67e-16	MFHAS1, ERI1, MSRA, SOX7, XKR6, MTMR9, FAM167A, BLK, NEIL2, FDFT1, CTSB
Ulcerative colitis	287	19	1.91e-18	2.11e-15	CELSR3, NCKIPSD, PRKAR2A, ARIH2, P4HTM, WDR6, DALRD3, IMPDH2, QRICH1, USP19, LAMB2, CCDC71, KLHDC8B, C3orf84, USP4, APEH, RNF123, AMIGO3, GMPPB, MANBA
Subcortical volume (min-P)	308	19	7.16e-18	6.34e-15	CELSR3, NCKIPSD, PRKAR2A, ARIH2, P4HTM, WDR6, DALRD3, IMPDH2, QRICH1, USP19, LAMB2, CCDC71, KLHDC8B, C3orf84, USP4, APEH, RNF123, AMIGO3, GMPPB, RBM6
Subcortical volume (MOSTest)	522	22	4.36e-17	3.22e-14	CELSR3, NCKIPSD, PRKAR2A, ARIH2, P4HTM, WDR6, DALRD3, IMPDH2, QRICH1, USP19, LAMB2, CCDC71, KLHDC8B, C3orf84, USP4, APEH, RNF123, AMIGO3, GMPPB, RBM6, FBN2, TRIM27, GABBR1
Cortical surface area (MOSTest)	401	20	5.57e-17	3.26e-14	CELSR3, NCKIPSD, PRKAR2A, ARIH2, P4HTM, WDR6, DALRD3, IMPDH2, QRICH1, USP19, LAMB2, CCDC71, KLHDC8B, C3orf84, USP4, APEH, RNF123, AMIGO3, GMPPB, RBM6, FBN2
Brain morphology (min-P)	345	19	5.90e-17	3.26e-14	CELSR3, NCKIPSD, PRKAR2A, ARIH2, P4HTM, WDR6, DALRD3, IMPDH2, QRICH1, USP19, LAMB2, CCDC71, KLHDC8B, C3orf84, USP4, APEH, RNF123, AMIGO3, GMPPB, RBM6
Waist circumference adjusted for body mass index	658	23	4.41e-16	2.17e-13	WDPCP, CELSR3, NCKIPSD, QRICH1, LAMB2, CCDC71, FBN2, GPR126, CLDN23, MFHAS1, ERI1, MSRA, SOX7, PINX1, XKR6, MTMR9, FAM167A, BLK, FDFT1, CTSB, MAPT, WNT3, BPTF
Waist-hip index	518	21	5.40e-16	2.39e-13	NCKIPSD, PRKAR2A, CCDC71, CLDN23, MFHAS1, ERI1, MSRA, SOX7, PINX1, XKR6, MTMR9, FAM167A, BLK, NEIL2, FDFT1, CTSB, ARHGAP27, CRHR1, SPPL2C, MAPT, WNT3
A body shape index	361	18	2.39e-15	9.63e-13	NCKIPSD, CCDC71, KLHDC8B, CLDN23, MFHAS1, ERI1, MSRA, SOX7, PINX1, XKR6, FAM167A, BLK, NEIL2, FDFT1, CTSB, ARHGAP27, CRHR1, MAPT
Fish- and plant-related diet	180	14	8.70e-15	3.21e-12	TRIM27, GABBR1, CLDN23, MFHAS1, ERI1, MSRA, SOX7, PINX1, XKR6, MTMR9, FAM167A, BLK, FDFT1, CTSB
Neuroticism	119	12	3.46e-14	1.18e-11	SHOX2, RSRC1, CLDN23, MFHAS1, ERI1, XKR6, ARHGAP27, PLEKHM1, CRHR1, SPPL2C, MAPT, STH
Crohn's disease	506	18	7.67e-13	2.43e-10	CELSR3, NCKIPSD, PRKAR2A, ARIH2, P4HTM, WDR6, DALRD3, IMPDH2, QRICH1, USP19, LAMB2, CCDC71, KLHDC8B, C3orf84, USP4, APEH, RNF123, GABBR1
Regular attendance at a religious group	68	9	5.13e-12	1.51e-9	WDPCP, APEH, RNF123, AMIGO3, GMPPB, UBA7, MIR5193, RBM6, BPTF, C17orf58, KPNA2
Inflammatory bowel disease	539	17	2.38e-11	6.57e-9	CELSR3, NCKIPSD, PRKAR2A, ARIH2, P4HTM, WDR6, DALRD3, IMPDH2, QRICH1, USP19, LAMB2, CCDC71, KLHDC8B, C3orf84, USP4, APEH, RNF123
Systolic blood pressure x smoking status (ever vs never) interaction (2df test)	83	9	3.26e-11	8.49e-9	RSRC1, MFHAS1, ERI1, MSRA, SOX7, PINX1, C8orf12, FAM167A, BLK
Handedness (Left-handed vs. non-left-handed)	8	5	4.22e-11	1.04e-8	MAPT, STH, ARL17B, LRRC37A, LRRC37A2, ARL17A, WNT3
Refractive error	1389	25	5.45e-11	1.27e-8	CELSR3, ARIH2, QRICH1, USP4, RNF123, RBM6, FBN2, CLDN23, MFHAS1, ERI1, MSRA, SOX7, XKR6, MTMR9, FAM167A, BLK, FDFT1, CTSB, ST18, ARHGAP27, MAPT, STH, WNT3, BPTF, KPNA2
Asthma and attention deficit hyperactivity disorder	9	5	9.46e-11	2.09e-8	WDPCP, MDH1, MANBA, UBE2D3, CISD2
Systolic blood pressure x smoking status (current vs non-current) interaction (2df test)	98	9	1.49e-10	3.14e-8	RSRC1, MFHAS1, ERI1, MSRA, SOX7, PINX1, C8orf12, FAM167A, BLK
Alcohol use disorder (total score)	28	6	9.75e-10	1.96e-7	PLEKHM1, CRHR1, SPPL2C, MAPT, STH, WNT3
General risk tolerance (MTAG)	224	11	1.07e-9	2.06e-7	WDPCP, TRIM27, CLDN23, MFHAS1, MSRA, PINX1, XKR6, BLK, CTSB, ST18, KPNA2
Mood instability	52	7	1.16e-9	2.14e-7	LAMB2, AMIGO3, GMPPB, CLDN23, MFHAS1, CRHR1, MAPT, WNT3
Parkinson's disease	146	9	5.26e-9	9.31e-7	NCKIPSD, CTSB, ARHGAP27, PLEKHM1, CRHR1, SPPL2C, MAPT, STH, WNT3
Waist-to-hip ratio adjusted for BMI	747	16	2.48e-8	4.22e-6	PRKAR2A, MFHAS1, ERI1, MSRA, SOX7, PINX1, XKR6, MTMR9, FAM167A, BLK, NEIL2, FDFT1, ARHGAP27, CRHR1, MAPT, WNT3
Regular attendance at a gym or sports club	32	5	1.41e-7	2.31e-5	APEH, RNF123, AMIGO3, GMPPB, UBA7, MIR5193, RBM6
Male-pattern baldness	221	9	1.89e-7	2.99e-5	ARHGAP27, PLEKHM1, CRHR1, SPPL2C, MAPT, STH, ARL17B, LRRC37A, LRRC37A2, ARL17A, WNT3
Handedness (Right-handed vs. non-right-handed)	4	3	2.21e-7	3.37e-5	STH, ARL17B, LRRC37A, LRRC37A2, ARL17A
Retinal vascular caliber	17	4	4.72e-7	6.96e-5	SOX7, PINX1, XKR6, MTMR9
Diastolic blood pressure x smoking status (ever vs never) interaction (2df test)	79	6	6.14e-7	8.77e-5	RSRC1, MFHAS1, ERI1, MSRA, SOX7, PINX1
Bone ultrasound measurement (broadband ultrasound attenuation)	19	4	7.64e-7	1.06e-4	CLDN23, MFHAS1, XKR6, MTMR9
Remission after SSRI treatment in MDD or neuroticism	6	3	1.10e-6	1.47e-4	MSRA, XKR6, PLEKHM1
Multiple system atrophy	21	4	1.17e-6	1.53e-4	FBN2, CRHR1, MAPT, WNT3
Diastolic blood pressure x smoking status (current vs non-current) interaction (2df test)	89	6	1.25e-6	1.57e-4	RSRC1, MFHAS1, ERI1, MSRA, SOX7, PINX1
Systemic lupus erythematosus	361	10	1.32e-6	1.63e-4	FBN2, MFHAS1, MSRA, PINX1, XKR6, MTMR9, TDH, FAM167A, BLK, ARHGAP27
Left–right brain asymmetry	23	4	1.73e-6	2.06e-4	CRHR1, MAPT, ARL17B, LRRC37A, LRRC37A2, ARL17A
Intracranial volume	7	3	1.91e-6	2.23e-4	CRHR1, MAPT, STH
Idiopathic pulmonary fibrosis	25	4	2.45e-6	2.78e-4	CRHR1, SPPL2C, MAPT, STH
Cortical surface area (global PC1)	8	3	3.05e-6	3.38e-4	ARHGAP27, CRHR1, WNT3
Body fat distribution (trunk fat ratio)	180	7	6.28e-6	6.78e-4	ARIH2, WDR6, DALRD3, IMPDH2, QRICH1, RBM6, XKR6
Morning person	182	7	6.75e-6	7.11e-4	PRKAR2A, ARIH2, RNF123, RBM6, CLDN23, ERI1, ST18
Reaction time	33	4	7.74e-6	7.97e-4	MAPT, ARL17B, LRRC37A, LRRC37A2, ARL17A, WNT3
Depression	72	5	8.67e-6	8.72e-4	WDPCP, RSRC1, GABBR1, MSRA, BLK
Sleep duration (short sleep)	79	5	1.37e-5	1.34e-3	USP4, APEH, RNF123, AMIGO3, GMPPB, RBM6
Handedness (non-right-handed vs right-handed)	2	2	1.47e-5	1.41e-3	MAPT, WNT3
Subcortical brain region volumes	14	3	1.95e-5	1.80e-3	CRHR1, MAPT, STH
Neurociticism	85	5	1.95e-5	1.80e-3	SHOX2, TRIM27, MSRA, C8orf12, STH
Number of sexual partners	93	5	3.02e-5	2.73e-3	WDPCP, SOX7, BLK, STH, C17orf58
Depressive symptom (depressed mood) (binary trait)	3	2	4.39e-5	3.89e-3	PRKAR2A, KLHDC8B
Body fat distribution (leg fat ratio)	168	6	4.79e-5	4.16e-3	ARIH2, WDR6, DALRD3, IMPDH2, QRICH1, RBM6
Systolic blood pressure	697	11	7.62e-5	6.48e-3	UGP2, ARIH2, LHFPL2, FBN2, CLDN23, MSRA, BLK, NEIL2, SNX16, NCALD, ARL17B, ARL17A
Handedness (left-handed vs. right-handed)	4	2	8.76e-5	7.18e-3	MAPT, WNT3
Head circumference (infant)	4	2	8.76e-5	7.18e-3	CRHR1, MAPT
Bipolar disorder (early vs late onset)	5	2	1.46e-4	1.17e-2	MFHAS1, ERI1
Medication use (calcium channel blockers)	70	4	1.56e-4	1.23e-2	FBN2, MFHAS1, PINX1, NEIL2
Extremely high intelligence	72	4	1.74e-4	1.35e-2	APEH, RNF123, AMIGO3, GMPPB, RBM6
Systolic blood pressure x alcohol consumption interaction (2df test)	73	4	1.83e-4	1.40e-2	MSRA, PINX1, XKR6, C8orf12
Joint mobility (Beighton score)	29	3	1.88e-4	1.41e-2	MSRA, XKR6, CRHR1
Autism spectrum disorder	30	3	2.08e-4	1.54e-2	SOX7, PINX1, XRN2
Household income (MTAG)	141	5	2.17e-4	1.56e-2	USP4, RNF123, RBM6, CRHR1, MAPT
Physical activity (overall physical activity time)	6	2	2.18e-4	1.56e-2	CRHR1, KANSL1-AS1
Systolic blood pressure x alcohol consumption (light vs heavy) interaction (2df test)	31	3	2.30e-4	1.61e-2	MSRA, XKR6, FAM167A
Household income	32	3	2.53e-4	1.75e-2	APEH, RNF123, MAPT
Alzheimer's disease in APOE e4- carriers	33	3	2.77e-4	1.89e-2	CRHR1, MAPT, WNT3
White matter integrity (mean diffusivity)	7	2	3.04e-4	2.01e-2	CRHR1, MAPT
Barrett's esophagus	7	2	3.04e-4	2.01e-2	MSRA, BLK
Primary biliary cirrhosis	40	3	4.93e-4	3.21e-2	MANBA, CRHR1, MAPT
Insomnia symptoms (never/rarely vs. usually)	42	3	5.69e-4	3.65e-2	KLHDC8B, RBM6, MSRA
Polymyositis	10	2	6.47e-4	4.09e-2	FAM167A, BLK
Anxiety/tension (special factor of neuroticism)	11	2	7.89e-4	4.92e-2	SOX7, PINX1

## Sheet: Table S7
rsID	locusnum	CHR	INDEP_BP	INDEP_SNP	CAND_BP	R2	LEAD_SNP	BP	A1	A2	conjFDR	trait	uniqID	MAF	nearestGene	dist	func	CADD	RDB	minChrState	commonChrState
rs10874979	1	1	96597502	rs1222067	96604986	0.671278	rs12130426	96604986	C	T	0.0486854	BMI	1:96604986:C:T	0.2416	RNU1-130P	86470	intergenic	4.824	5	15	15
rs12130426	1	1	96603035	rs12130426	96603035	1	rs12130426	96603035	C	T	0.00709205	BMI	1:96603035:C:T	0.4245	RNU1-130P	88421	intergenic	2.839	5	14	15
rs1222067	1	1	96597502	rs1222067	96597502	1	rs12130426	96597502	C	A	0.0218578	BMI	1:96597502:A:C	0.3121	RNU1-130P	93954	intergenic	2.235	NA	14	15
rs1402807	1	1	96603035	rs12130426	96597055	0.961075	rs12130426	96597055	C	T	0.011903	BMI	1:96597055:C:T	0.4334	RNU1-130P	94401	intergenic	16.02	NA	7	15
rs2391734	1	1	96597502	rs1222067	96604591	0.906413	rs12130426	96604591	T	G	0.0291567	BMI	1:96604591:G:T	0.2893	RNU1-130P	86865	intergenic	1.529	6	15	15
rs1348804	2	2	63891261	rs262517	63895672	1	rs262517	63895672	C	T	0.0343527	BMI	2:63895672:C:T	0.2982	WDPCP	0	intergenic	1.282	5	2	15
rs174485	2	2	63891261	rs262517	63857402	0.851645	rs262517	63857402	G	A	0.0492519	BMI	2:63857402:A:G	0.2932	WDPCP	0	intergenic	0.997	7	5	15
rs262501	2	2	63891261	rs262517	63858657	0.842559	rs262517	63858657	G	A	0.042362	BMI	2:63858657:A:G	0.2972	WDPCP	0	intergenic	0.006	1f	5	15
rs262517	2	2	63891261	rs262517	63891261	1	rs262517	63891261	G	T	0.0205574	BMI	2:63891261:G:T	0.2982	WDPCP	0	intergenic	6.535	5	4	15
rs262531	2	2	63891261	rs262517	63904951	1	rs262517	63904951	A	C	0.022429	BMI	2:63904951:A:C	0.2982	WDPCP	0	intergenic	4.112	6	5	15
rs262537	2	2	63891261	rs262517	63907331	1	rs262517	63907331	C	T	0.0263358	BMI	2:63907331:C:T	0.2982	WDPCP	0	intergenic	0.089	7	5	15
rs10182738	3	2	104227869	rs6543223	104243342	0.976459	rs6543223	104243342	A	G	0.0266635	BMI	2:104243342:A:G	0.4215	AC018880.2	3053	intergenic	1.57	6	9	15
rs10189533	3	2	104227869	rs6543223	104219240	0.980365	rs6543223	104219240	C	A	0.0264459	BMI	2:104219240:A:C	0.4205	AC018880.2	20847	intergenic	1.066	6	9	15
rs10198643	3	2	104227869	rs6543223	104253461	0.980365	rs6543223	104253461	A	C	0.0244336	BMI	2:104253461:A:C	0.4205	AC018880.2	13172	intergenic	7.39	6	9	15
rs11123965	3	2	104227869	rs6543223	104240205	0.980365	rs6543223	104240205	T	C	0.0232114	BMI	2:104240205:C:T	0.4205	AC018880.2	0	ncRNA_exonic	2.172	7	9	15
rs11888473	3	2	104227869	rs6543223	104240420	0.972408	rs6543223	104240420	T	C	0.0268933	BMI	2:104240420:C:T	0.4205	AC018880.2	131	downstream	0.167	7	9	15
rs12328095	3	2	104227869	rs6543223	104236822	0.976459	rs6543223	104236822	G	A	0.0284759	BMI	2:104236822:A:G	0.4215	AC018880.2	3265	intergenic	5.209	7	9	15
rs13396809	3	2	104227869	rs6543223	104228863	0.984288	rs6543223	104228863	G	A	0.0256845	BMI	2:104228863:A:G	0.4195	AC018880.2	11224	intergenic	1.224	7	9	15
rs13411937	3	2	104227869	rs6543223	104186652	0.984288	rs6543223	104186652	A	G	0.0356846	BMI	2:104186652:A:G	0.4195	AC018880.1	40932	intergenic	9.791	6	9	15
rs1451974	3	2	104227869	rs6543223	104173664	0.980365	rs6543223	104173664	C	T	0.0356686	BMI	2:104173664:C:T	0.4205	AC018880.1	27944	intergenic	0.339	NA	9	15
rs1451982	3	2	104227869	rs6543223	104143998	0.826601	rs6543223	104143998	T	G	0.0471167	BMI	2:104143998:G:T	0.4364	AC018880.1	79	upstream	2.905	NA	5	15
rs1451988	3	2	104227869	rs6543223	104222589	0.984288	rs6543223	104222589	A	G	0.0257238	BMI	2:104222589:A:G	0.4195	AC018880.2	17498	intergenic	1.295	6	9	15
rs1584705	3	2	104227869	rs6543223	104239736	0.976459	rs6543223	104239736	T	C	0.0271931	BMI	2:104239736:C:T	0.4215	AC018880.2	351	upstream	2.556	6	9	15
rs1673464	3	2	104227869	rs6543223	104264977	0.980365	rs6543223	104264977	T	C	0.0268417	BMI	2:104264977:C:T	0.4205	AC018880.2	24688	intergenic	1.486	5	9	15
rs171939	3	2	104227869	rs6543223	104276502	0.9727	rs6543223	104276502	G	A	0.0301969	BMI	2:104276502:A:G	0.4225	AC018880.2	36213	intergenic	5.503	6	9	15
rs17336454	3	2	104227869	rs6543223	104124146	0.826601	rs6543223	104124146	G	T	0.0477026	BMI	2:104124146:G:T	0.4364	AC092568.1	11845	intergenic	0.17	7	9	15
rs1869073	3	2	104227869	rs6543223	104204520	0.980365	rs6543223	104204520	T	C	0.0358435	BMI	2:104204520:C:T	0.4205	AC018880.2	35567	intergenic	0.033	NA	9	15
rs1901480	3	2	104227869	rs6543223	104253005	0.932324	rs6543223	104253005	G	A	0.0440863	BMI	2:104253005:A:G	0.4334	AC018880.2	12716	intergenic	0.565	NA	9	15
rs1983305	3	2	104227869	rs6543223	104164439	0.980365	rs6543223	104164439	T	C	0.0345973	BMI	2:104164439:C:T	0.4205	AC018880.1	18719	intergenic	0.371	NA	9	15
rs2084814	3	2	104227869	rs6543223	104198288	0.980365	rs6543223	104198288	T	C	0.0334089	BMI	2:104198288:C:T	0.4205	AC018880.2	41799	intergenic	0.559	NA	9	15
rs2085484	3	2	104227869	rs6543223	104314216	0.909475	rs6543223	104314216	A	G	0.044191	BMI	2:104314216:A:G	0.3956	AC018880.2	73927	intergenic	0.062	7	9	15
rs2375766	3	2	104227869	rs6543223	104191900	0.980365	rs6543223	104191900	G	A	0.0338528	BMI	2:104191900:A:G	0.4205	AC018880.1	46180	intergenic	1.206	7	9	15
rs264926	3	2	104227869	rs6543223	104279490	0.980365	rs6543223	104279490	A	C	0.0267109	BMI	2:104279490:A:C	0.4205	AC018880.2	39201	intergenic	0.178	5	9	15
rs264938	3	2	104227869	rs6543223	104296743	0.908946	rs6543223	104296743	C	T	0.0490483	BMI	2:104296743:C:T	0.3976	AC018880.2	56454	intergenic	0.887	7	7	15
rs264945	3	2	104227869	rs6543223	104298784	0.913176	rs6543223	104298784	T	C	0.0458379	BMI	2:104298784:C:T	0.3966	AC018880.2	58495	intergenic	0.203	7	9	15
rs264947	3	2	104227869	rs6543223	104299089	0.913176	rs6543223	104299089	A	G	0.0452872	BMI	2:104299089:A:G	0.3966	AC018880.2	58800	intergenic	3.578	6	9	15
rs264952	3	2	104227869	rs6543223	104303311	0.913176	rs6543223	104303311	C	T	0.049469	BMI	2:104303311:C:T	0.3966	AC018880.2	63022	intergenic	13.21	6	9	15
rs264965	3	2	104227869	rs6543223	104255919	0.980365	rs6543223	104255919	A	C	0.0234079	BMI	2:104255919:A:C	0.4205	AC018880.2	15630	intergenic	0.658	7	9	15
rs264966	3	2	104227869	rs6543223	104255937	0.980365	rs6543223	104255937	C	T	0.0248006	BMI	2:104255937:C:T	0.4205	AC018880.2	15648	intergenic	1.064	7	9	15
rs264970	3	2	104227869	rs6543223	104258261	0.980365	rs6543223	104258261	C	T	0.0258187	BMI	2:104258261:C:T	0.4205	AC018880.2	17972	intergenic	1.867	NA	9	15
rs264972	3	2	104227869	rs6543223	104259981	0.980365	rs6543223	104259981	T	G	0.0263171	BMI	2:104259981:G:T	0.4205	AC018880.2	19692	intergenic	0.61	NA	9	15
rs264975	3	2	104227869	rs6543223	104268301	0.980365	rs6543223	104268301	A	G	0.026579	BMI	2:104268301:A:G	0.4205	AC018880.2	28012	intergenic	0.021	NA	9	15
rs264980	3	2	104227869	rs6543223	104269979	0.980365	rs6543223	104269979	T	C	0.026579	BMI	2:104269979:C:T	0.4205	AC018880.2	29690	intergenic	3.567	NA	9	15
rs4283441	3	2	104227869	rs6543223	104125396	0.826601	rs6543223	104125396	C	T	0.0488587	BMI	2:104125396:C:T	0.4364	AC092568.1	13095	intergenic	1.793	7	9	15
rs4851029	3	2	104227869	rs6543223	104159785	0.878719	rs6543223	104159785	T	G	0.0327512	BMI	2:104159785:G:T	0.4215	AC018880.1	14065	intergenic	0.111	6	9	15
rs4851031	3	2	104227869	rs6543223	104164950	0.984288	rs6543223	104164950	A	G	0.0335208	BMI	2:104164950:A:G	0.4195	AC018880.1	19230	intergenic	1.099	7	9	15
rs6543217	3	2	104227869	rs6543223	104183265	0.984288	rs6543223	104183265	A	G	0.0342995	BMI	2:104183265:A:G	0.4195	AC018880.1	37545	intergenic	5.267	6	9	15
rs6543218	3	2	104227869	rs6543223	104183537	0.984288	rs6543223	104183537	A	C	0.0342995	BMI	2:104183537:A:C	0.4195	AC018880.1	37817	intergenic	1.127	7	9	15
rs6543223	3	2	104227869	rs6543223	104227869	1	rs6543223	104227869	T	C	0.0215238	BMI	2:104227869:C:T	0.4175	AC018880.2	12218	intergenic	2.307	7	9	15
rs6711344	3	2	104227869	rs6543223	104199025	0.992075	rs6543223	104199025	A	G	0.032099	BMI	2:104199025:A:G	0.4155	AC018880.2	41062	intergenic	0.748	7	9	15
rs6719978	3	2	104227869	rs6543223	104238501	0.992042	rs6543223	104238501	G	A	0.0250892	BMI	2:104238501:A:G	0.4175	AC018880.2	1586	intergenic	0.242	5	9	15
rs6721892	3	2	104227869	rs6543223	104163187	0.984288	rs6543223	104163187	G	A	0.0333414	BMI	2:104163187:A:G	0.4195	AC018880.1	17467	intergenic	3.478	6	9	15
rs6723416	3	2	104227869	rs6543223	104147753	0.826601	rs6543223	104147753	A	G	0.0460196	BMI	2:104147753:A:G	0.4364	AC018880.1	2033	intergenic	4.263	5	7	15
rs6727525	3	2	104227869	rs6543223	104202712	0.984288	rs6543223	104202712	T	G	0.0328993	BMI	2:104202712:G:T	0.4195	AC018880.2	37375	intergenic	0.811	6	9	15
rs6738539	3	2	104227869	rs6543223	104195755	0.980365	rs6543223	104195755	C	T	0.034466	BMI	2:104195755:C:T	0.4205	AC018880.2	44332	intergenic	1.726	7	9	15
rs7564071	3	2	104227869	rs6543223	104129328	0.826601	rs6543223	104129328	A	C	0.0486854	BMI	2:104129328:A:C	0.4364	AC018880.1	14749	intergenic	2.437	6	9	15
rs7567562	3	2	104227869	rs6543223	104137154	0.826601	rs6543223	104137154	G	A	0.0496995	BMI	2:104137154:A:G	0.4364	AC018880.1	6923	intergenic	1.987	7	9	15
rs7573399	3	2	104227869	rs6543223	104123234	0.826601	rs6543223	104123234	G	A	0.0477026	BMI	2:104123234:A:G	0.4364	AC092568.1	10933	intergenic	1.462	5	9	15
rs7574952	3	2	104227869	rs6543223	104142699	0.826601	rs6543223	104142699	A	G	0.0480949	BMI	2:104142699:A:G	0.4364	AC018880.1	1378	intergenic	0.868	6	5	15
rs7580027	3	2	104227869	rs6543223	104178377	0.984288	rs6543223	104178377	T	G	0.0341316	BMI	2:104178377:G:T	0.4195	AC018880.1	32657	intergenic	0.164	7	9	15
rs7591265	3	2	104227869	rs6543223	104196439	0.984288	rs6543223	104196439	C	T	0.0317056	BMI	2:104196439:C:T	0.4195	AC018880.2	43648	intergenic	5.032	7	9	15
rs921965	3	2	104227869	rs6543223	104319881	0.900998	rs6543223	104319881	A	G	0.0450715	BMI	2:104319881:A:G	0.3976	AC018880.2	79592	intergenic	1.412	7	9	15
rs17734594	4	2	142339047	rs17734594	142339047	1	rs17734594	142339047	C	A	0.04119	BMI	2:142339047:A:C	0.07356	LRP1B	0	intronic	7.785	6	7	15
rs1111212	5	2	159388986	rs2883872	159312733	0.964524	rs2883872	159312733	C	T	0.0269571	BMI	2:159312733:C:T	0.3757	CCDC148	0	intronic	7.517	4	1	2
rs1118906	5	2	159388986	rs2883872	159361353	0.935132	rs2883872	159361353	C	A	0.017582	BMI	2:159361353:A:C	0.3857	PKP4	0	intronic	1.485	5	5	5
rs1125661	5	2	159388986	rs2883872	159316583	0.964524	rs2883872	159316583	A	G	0.0257461	BMI	2:159316583:A:G	0.3757	PKP4	0	intronic	3.852	7	1	7
rs11674284	5	2	159388986	rs2883872	159372889	0.684849	rs2883872	159372889	G	A	0.0475982	BMI	2:159372889:A:G	0.2803	PKP4	0	intronic	2.438	6	5	15
rs11675009	5	2	159388986	rs2883872	159377277	0.684849	rs2883872	159377277	T	C	0.0467646	BMI	2:159377277:C:T	0.2803	PKP4	0	intronic	3.479	7	4	15
rs11677605	5	2	159388986	rs2883872	159371596	0.684849	rs2883872	159371596	A	G	0.0472606	BMI	2:159371596:A:G	0.2803	PKP4	0	intronic	2.683	5	5	15
rs11685439	5	2	159388986	rs2883872	159376612	0.684849	rs2883872	159376612	A	G	0.0469189	BMI	2:159376612:A:G	0.2803	PKP4	0	intronic	0.286	6	4	15
rs11688809	5	2	159388986	rs2883872	159378986	0.684849	rs2883872	159378986	A	G	0.0467646	BMI	2:159378986:A:G	0.2803	PKP4	0	intronic	2.101	5	4	15
rs11695939	5	2	159388986	rs2883872	159376514	0.684849	rs2883872	159376514	T	C	0.0469189	BMI	2:159376514:C:T	0.2803	PKP4	0	intronic	2.322	5	5	15
rs2356186	5	2	159388986	rs2883872	159364472	0.935132	rs2883872	159364472	T	C	0.0167171	BMI	2:159364472:C:T	0.3857	PKP4	0	intronic	4.794	4	5	5
rs2883872	5	2	159388986	rs2883872	159388986	1	rs2883872	159388986	G	A	0.0128334	BMI	2:159388986:A:G	0.3688	PKP4	0	intronic	0.61	7	5	5
rs3755402	5	2	159388986	rs2883872	159390454	0.935132	rs2883872	159390454	A	G	0.0138571	BMI	2:159390454:A:G	0.3857	PKP4	0	intronic	1.407	6	4	5
rs3771593	5	2	159388986	rs2883872	159393172	0.689211	rs2883872	159393172	A	G	0.0497419	BMI	2:159393172:A:G	0.2823	PKP4	0	intronic	8.964	7	4	5
rs3771599	5	2	159388986	rs2883872	159397428	0.93172	rs2883872	159397428	C	T	0.0154802	BMI	2:159397428:C:T	0.3867	PKP4	0	intronic	14.59	6	4	5
rs3771602	5	2	159388986	rs2883872	159406250	0.931453	rs2883872	159406250	A	G	0.0153974	BMI	2:159406250:A:G	0.3867	PKP4	0	intronic	5.273	6	4	5
rs6437184	5	2	159388986	rs2883872	159354852	0.93172	rs2883872	159354852	C	T	0.0156211	BMI	2:159354852:C:T	0.3867	PKP4	0	intronic	0.32	5	5	5
rs6710184	5	2	159388986	rs2883872	159319410	0.895093	rs2883872	159319410	G	A	0.0218625	BMI	2:159319410:A:G	0.3926	PKP4	0	intronic	2.229	7	5	5
rs6711582	5	2	159388986	rs2883872	159327935	0.992043	rs2883872	159327935	A	G	0.0184641	BMI	2:159327935:A:G	0.3688	PKP4	0	intronic	18.21	6	4	5
rs6730686	5	2	159388986	rs2883872	159374984	0.93172	rs2883872	159374984	G	A	0.0157069	BMI	2:159374984:A:G	0.3867	PKP4	0	intronic	4.224	2b	5	15
rs6733579	5	2	159388986	rs2883872	159378631	0.684849	rs2883872	159378631	C	T	0.0472512	BMI	2:159378631:C:T	0.2803	PKP4	0	intronic	4.66	7	4	15
rs1452075	6	3	62481063	rs1452075	62481063	1	rs1452075	62481063	C	T	0.000514012	BMI	3:62481063:C:T	0.2843	CADPS	0	intronic	3.345	7	5	15
rs10936139	7	3	158152073	rs11707386	158138935	0.969271	rs11707386	158138935	C	T	0.0392969	BMI	3:158138935:C:T	0.2376	RSRC1	0	intronic	4.204	3a	1	15
rs11707386	7	3	158152073	rs11707386	158152073	1	rs11707386	158152073	A	G	0.0208062	BMI	3:158152073:A:G	0.2416	RSRC1	0	intronic	0.928	7	5	15
rs11719153	7	3	158152073	rs11707386	158018587	0.93405	rs11707386	158018587	A	G	0.044544	BMI	3:158018587:A:G	0.2386	RSRC1	0	intronic	6.912	7	5	15
rs12496934	7	3	158152073	rs11707386	158149561	0.964251	rs11707386	158149561	A	G	0.0393118	BMI	3:158149561:A:G	0.2386	RSRC1	0	intronic	0.893	6	5	15
rs17683939	7	3	158152073	rs11707386	158041712	0.93405	rs11707386	158041712	T	C	0.0480949	BMI	3:158041712:C:T	0.2386	RSRC1	0	intronic	2.996	7	5	15
rs1851062	7	3	158152073	rs11707386	157992363	0.93405	rs11707386	157992363	A	G	0.0465916	BMI	3:157992363:A:G	0.2386	RSRC1	0	intronic	7.781	6	4	15
rs4680421	7	3	158152073	rs11707386	157934971	0.929022	rs11707386	157934971	A	G	0.0490804	BMI	3:157934971:A:G	0.2396	RSRC1	0	intronic	1.368	6	5	15
rs4680435	7	3	158152073	rs11707386	158158365	0.969271	rs11707386	158158365	A	G	0.0369648	BMI	3:158158365:A:G	0.2376	RSRC1	0	intronic	3.373	6	5	15
rs7624303	7	3	158152073	rs11707386	157851223	0.93405	rs11707386	157851223	G	A	0.0379902	BMI	3:157851223:A:G	0.2386	RSRC1	0	intronic	17.6	5	4	5
rs170564	8	4	103607806	rs227285	103608308	1	rs227285	103608308	C	T	0.0439317	BMI	4:103608308:C:T	0.334	MANBA	0	intronic	2.136	NA	2	5
rs223508	8	4	103607806	rs227285	103632963	0.970742	rs227285	103632963	T	C	0.0477944	BMI	4:103632963:C:T	0.327	MANBA	0	intronic	1.992	6	4	5
rs227284	8	4	103607806	rs227285	103607635	0.995771	rs227285	103607635	G	A	0.0452872	BMI	4:103607635:A:G	0.333	MANBA	0	intronic	4.092	NA	2	5
rs227285	8	4	103607806	rs227285	103607806	1	rs227285	103607806	C	T	0.0401432	BMI	4:103607806:C:T	0.334	MANBA	0	intronic	0.493	NA	2	5
rs227369	8	4	103607806	rs227285	103612018	1	rs227285	103612018	G	T	0.045203	BMI	4:103612018:G:T	0.334	MANBA	0	intronic	7.418	NA	4	5
rs227370	8	4	103607806	rs227285	103612043	0.98734	rs227285	103612043	T	C	0.0448219	BMI	4:103612043:C:T	0.331	MANBA	0	intronic	0.971	NA	4	5
rs227372	8	4	103607806	rs227285	103612917	0.995765	rs227285	103612917	T	C	0.0412632	BMI	4:103612917:C:T	0.333	MANBA	0	intronic	0.773	NA	4	5
rs2139816	9	4	171178771	rs2139816	171178771	1	rs2139816	171178771	C	T	0.0449883	BMI	4:171178771:C:T	0.4652	RP11-789C1.1	16298	intergenic	10.68	NA	5	15
rs4692812	9	4	171178771	rs2139816	171180273	0.996035	rs2139816	171180273	G	A	0.0467431	BMI	4:171180273:A:G	0.4662	RP11-789C1.1	14796	intergenic	5.65	7	5	15
rs7657061	9	4	171178771	rs2139816	171197775	0.92277	rs2139816	171197775	G	A	0.0458876	BMI	4:171197775:A:G	0.4841	RP11-789C1.1	0	ncRNA_exonic	0.996	7	5	15
rs4242244	10	5	92546237	rs4242244	92546237	1	rs4242244	92546237	G	T	0.0488353	BMI	5:92546237:G:T	0.4085	POLD2P1	56897	intergenic	6.806	6	5	15
rs10053368	11	5	103933473	rs2447832	103914758	0.787144	rs2447832	103914758	A	G	0.0177235	BMI	5:103914758:A:G	0.4811	RP11-6N13.1	0	ncRNA_intronic	8.776	7	5	15
rs10059133	11	5	103933473	rs2447832	103901424	0.836928	rs2447832	103901424	C	T	0.0115636	BMI	5:103901424:C:T	0.4553	RP11-6N13.1	0	ncRNA_intronic	3.448	7	7	15
rs10059643	11	5	103933473	rs2447832	103919840	0.787144	rs2447832	103919840	G	A	0.0185859	BMI	5:103919840:A:G	0.4811	RP11-6N13.1	0	ncRNA_intronic	3.935	6	5	15
rs10064425	11	5	103933473	rs2447832	103899690	0.817768	rs2447832	103899690	T	C	0.0258449	BMI	5:103899690:C:T	0.4692	RP11-6N13.1	0	ncRNA_intronic	1.668	6	9	15
rs10455065	11	5	103933473	rs2447832	103941401	0.812209	rs2447832	103941401	T	C	0.012097	BMI	5:103941401:C:T	0.4712	RP11-6N13.1	0	ncRNA_intronic	2.153	7	15	15
rs10455066	11	5	103933473	rs2447832	103941415	0.812209	rs2447832	103941415	T	G	0.0108021	BMI	5:103941415:G:T	0.4712	RP11-6N13.1	0	ncRNA_intronic	3.326	6	15	15
rs10477834	11	5	103933473	rs2447832	103917352	0.787144	rs2447832	103917352	A	C	0.0185859	BMI	5:103917352:A:C	0.4811	RP11-6N13.1	0	ncRNA_intronic	0.051	6	5	15
rs10479296	11	5	103933473	rs2447832	103915443	0.787144	rs2447832	103915443	G	A	0.0177235	BMI	5:103915443:A:G	0.4811	RP11-6N13.1	0	ncRNA_intronic	3.567	5	5	15
rs11242522	11	5	103933473	rs2447832	103904914	0.813276	rs2447832	103904914	T	C	0.024929	BMI	5:103904914:C:T	0.4682	RP11-6N13.1	0	ncRNA_intronic	0.949	6	9	15
rs11738191	11	5	103933473	rs2447832	103913202	0.787144	rs2447832	103913202	A	G	0.0185859	BMI	5:103913202:A:G	0.4811	RP11-6N13.1	0	ncRNA_intronic	0.402	5	15	15
rs11747766	11	5	103933473	rs2447832	103838556	0.77009	rs2447832	103838556	G	T	0.0291567	BMI	5:103838556:G:T	0.4781	RP11-6N13.1	0	ncRNA_intronic	5.016	7	9	15
rs11955377	11	5	103933473	rs2447832	103861597	0.762681	rs2447832	103861597	C	A	0.0185859	BMI	5:103861597:A:C	0.4811	RP11-6N13.1	0	ncRNA_intronic	6.676	6	15	15
rs12187898	11	5	103933473	rs2447832	103939674	0.836244	rs2447832	103939674	C	T	0.0105581	BMI	5:103939674:C:T	0.4702	RP11-6N13.1	0	ncRNA_intronic	1.063	6	9	15
rs12515429	11	5	103933473	rs2447832	103905275	0.813276	rs2447832	103905275	C	T	0.024929	BMI	5:103905275:C:T	0.4682	RP11-6N13.1	0	ncRNA_intronic	2.957	6	9	15
rs13165289	11	5	103933473	rs2447832	103836995	0.77009	rs2447832	103836995	C	T	0.0296918	BMI	5:103836995:C:T	0.4781	RP11-6N13.1	0	ncRNA_intronic	6.841	7	9	15
rs13187104	11	5	103933473	rs2447832	103841272	0.774684	rs2447832	103841272	G	T	0.0291567	BMI	5:103841272:G:T	0.4791	RP11-6N13.1	0	ncRNA_intronic	0.273	6	9	15
rs1363096	11	5	103933473	rs2447832	103876193	0.773122	rs2447832	103876193	A	G	0.0285916	BMI	5:103876193:A:G	0.4771	RP11-6N13.1	0	ncRNA_intronic	7.829	NA	5	15
rs1363097	11	5	103933473	rs2447832	103875902	0.777704	rs2447832	103875902	T	C	0.0260592	BMI	5:103875902:C:T	0.4781	RP11-6N13.1	0	ncRNA_intronic	1.519	NA	5	15
rs1363098	11	5	103933473	rs2447832	103867339	0.77009	rs2447832	103867339	A	G	0.0277854	BMI	5:103867339:A:G	0.4781	RP11-6N13.1	0	ncRNA_intronic	4.628	7	5	15
rs1363101	11	5	103933473	rs2447832	103941070	0.812209	rs2447832	103941070	T	G	0.0107024	BMI	5:103941070:G:T	0.4712	RP11-6N13.1	0	ncRNA_intronic	2.991	NA	15	15
rs1363102	11	5	103933473	rs2447832	103917867	0.783396	rs2447832	103917867	G	T	0.0185859	BMI	5:103917867:G:T	0.4801	RP11-6N13.1	0	ncRNA_intronic	0.062	NA	5	15
rs1421665	11	5	103933473	rs2447832	103914014	0.787144	rs2447832	103914014	C	T	0.0181701	BMI	5:103914014:C:T	0.4811	RP11-6N13.1	0	ncRNA_intronic	11.51	NA	7	15
rs1421667	11	5	103933473	rs2447832	103907606	0.817768	rs2447832	103907606	G	A	0.024929	BMI	5:103907606:A:G	0.4692	RP11-6N13.1	0	ncRNA_intronic	2.873	NA	5	15
rs1582419	11	5	103933473	rs2447832	103870101	0.759699	rs2447832	103870101	C	T	0.0193988	BMI	5:103870101:C:T	0.4821	RP11-6N13.1	0	ncRNA_intronic	0.919	NA	5	15
rs1592754	11	5	103933473	rs2447832	103938115	0.782044	rs2447832	103938115	C	T	0.0201917	BMI	5:103938115:C:T	0.4831	RP11-6N13.1	0	ncRNA_intronic	1.279	NA	9	15
rs185260	11	5	103933473	rs2447832	103965223	0.969211	rs2447832	103965223	C	A	0.011929	BMI	5:103965223:A:C	0.4215	RP11-6N13.1	0	ncRNA_intronic	17.1	7	14	15
rs2018142	11	5	103933473	rs2447832	103941793	0.814632	rs2447832	103941793	C	A	0.0126006	BMI	5:103941793:A:C	0.4702	RP11-6N13.1	0	ncRNA_intronic	0.612	6	7	15
rs2112163	11	5	103933473	rs2447832	103946482	0.976913	rs2447832	103946482	T	C	0.00624751	BMI	5:103946482:C:T	0.4235	RP11-6N13.1	0	ncRNA_intronic	4.36	NA	5	15
rs2161097	11	5	103933473	rs2447832	103945178	0.984606	rs2447832	103945178	T	C	0.00761872	BMI	5:103945178:C:T	0.4215	RP11-6N13.1	0	ncRNA_intronic	0.97	NA	5	15
rs2447828	11	5	103933473	rs2447832	103947205	0.984606	rs2447832	103947205	T	C	0.00658167	BMI	5:103947205:C:T	0.4215	RP11-6N13.1	0	ncRNA_intronic	1.996	NA	5	15
rs2447832	11	5	103933473	rs2447832	103933473	1	rs2447832	103933473	T	C	0.00574028	BMI	5:103933473:C:T	0.4235	RP11-6N13.1	0	ncRNA_intronic	7.106	NA	9	15
rs2447838	11	5	103933473	rs2447832	103927579	0.992316	rs2447832	103927579	T	C	0.00688353	BMI	5:103927579:C:T	0.4215	RP11-6N13.1	0	ncRNA_intronic	3.189	7	9	15
rs254011	11	5	103933473	rs2447832	103920770	0.944559	rs2447832	103920770	A	C	0.0115636	BMI	5:103920770:A:C	0.4384	RP11-6N13.1	0	ncRNA_intronic	5.552	NA	5	15
rs254020	11	5	103933473	rs2447832	103950251	0.965384	rs2447832	103950251	T	C	0.00926753	BMI	5:103950251:C:T	0.4205	RP11-6N13.1	0	ncRNA_intronic	1.271	NA	15	15
rs254023	11	5	103933473	rs2447832	103955361	0.969211	rs2447832	103955361	C	T	0.00698743	BMI	5:103955361:C:T	0.4215	RP11-6N13.1	0	ncRNA_intronic	2.911	NA	7	15
rs325481	11	5	103933473	rs2447832	104000752	0.883191	rs2447832	104000752	G	A	0.0111401	BMI	5:104000752:A:G	0.3976	RP11-6N13.1	0	ncRNA_intronic	6.004	NA	9	15
rs325485	11	5	103933473	rs2447832	103995368	0.813764	rs2447832	103995368	A	G	0.0167171	BMI	5:103995368:A:G	0.3738	RP11-6N13.1	0	ncRNA_intronic	18.49	3a	5	15
rs325521	11	5	103933473	rs2447832	104043156	0.80978	rs2447832	104043156	C	T	0.0160291	BMI	5:104043156:C:T	0.4145	RP11-6N13.1	0	ncRNA_intronic	2.375	5	7	15
rs325523	11	5	103933473	rs2447832	104045386	0.810323	rs2447832	104045386	C	A	0.0109182	BMI	5:104045386:A:C	0.4165	RP11-6N13.1	0	ncRNA_intronic	0.759	6	7	15
rs33817	11	5	103933473	rs2447832	103978326	0.973099	rs2447832	103978326	A	G	0.00909642	BMI	5:103978326:A:G	0.4205	RP11-6N13.1	0	ncRNA_intronic	0.364	NA	7	15
rs410915	11	5	103933473	rs2447832	104034140	0.813589	rs2447832	104034140	C	T	0.0149302	BMI	5:104034140:C:T	0.4155	RP11-6N13.1	0	ncRNA_intronic	1.444	NA	8	9
rs4295362	11	5	103933473	rs2447832	103908868	0.813276	rs2447832	103908868	C	T	0.0236247	BMI	5:103908868:C:T	0.4682	RP11-6N13.1	0	ncRNA_intronic	1.205	7	7	15
rs4438849	11	5	103933473	rs2447832	103895102	0.834193	rs2447832	103895102	G	T	0.0121931	BMI	5:103895102:G:T	0.4563	RP11-6N13.1	0	ncRNA_intronic	3.858	7	9	15
rs4482879	11	5	103933473	rs2447832	103878652	0.779221	rs2447832	103878652	C	A	0.0287835	BMI	5:103878652:A:C	0.4751	RP11-6N13.1	0	ncRNA_intronic	0.562	7	9	15
rs4515268	11	5	103933473	rs2447832	103874262	0.773122	rs2447832	103874262	G	T	0.0266778	BMI	5:103874262:G:T	0.4771	RP11-6N13.1	0	ncRNA_intronic	0.561	6	5	15
rs4521446	11	5	103933473	rs2447832	103897758	0.817768	rs2447832	103897758	C	T	0.0253993	BMI	5:103897758:C:T	0.4692	RP11-6N13.1	0	ncRNA_intronic	1.348	6	9	15
rs4703040	11	5	103933473	rs2447832	103879813	0.779221	rs2447832	103879813	T	G	0.0302	BMI	5:103879813:G:T	0.4751	RP11-6N13.1	0	ncRNA_intronic	3.434	6	15	15
rs6596578	11	5	103933473	rs2447832	103899178	0.817768	rs2447832	103899178	G	A	0.0215542	BMI	5:103899178:A:G	0.4692	RP11-6N13.1	0	ncRNA_intronic	1.105	7	9	15
rs6865511	11	5	103933473	rs2447832	103902180	0.817768	rs2447832	103902180	C	T	0.024929	BMI	5:103902180:C:T	0.4692	RP11-6N13.1	0	ncRNA_intronic	5.146	7	7	15
rs6869862	11	5	103933473	rs2447832	103886213	0.816827	rs2447832	103886213	G	T	0.019931	BMI	5:103886213:G:T	0.4573	RP11-6N13.1	0	ncRNA_intronic	0.864	5	7	15
rs6881764	11	5	103933473	rs2447832	103810310	0.747597	rs2447832	103810310	A	G	0.0244311	BMI	5:103810310:A:G	0.4791	RP11-6N13.1	0	ncRNA_intronic	2.981	6	9	15
rs768905	11	5	103933473	rs2447832	103909664	0.817768	rs2447832	103909664	T	C	0.0153302	BMI	5:103909664:C:T	0.4692	RP11-6N13.1	0	ncRNA_intronic	1.889	7	5	15
rs7703746	11	5	103933473	rs2447832	103907337	0.843434	rs2447832	103907337	G	A	0.00971029	BMI	5:103907337:A:G	0.4602	RP11-6N13.1	0	ncRNA_intronic	2.881	6	5	15
rs7706513	11	5	103933473	rs2447832	103832094	0.77009	rs2447832	103832094	A	G	0.0291567	BMI	5:103832094:A:G	0.4781	RP11-6N13.1	0	ncRNA_intronic	1.125	7	5	15
rs7710489	11	5	103933473	rs2447832	103916349	0.787144	rs2447832	103916349	T	C	0.0172412	BMI	5:103916349:C:T	0.4811	RP11-6N13.1	0	ncRNA_intronic	1.479	7	5	15
rs13165130	12	5	113681050	rs13165130	113681050	1	rs13165130	113681050	G	A	0.0350846	BMI	5:113681050:A:G	0.335	KCNN2	15591	intergenic	8.344	7	14	15
rs13184870	12	5	113681050	rs13165130	113663831	0.951077	rs13165130	113663831	G	T	0.0447427	BMI	5:113663831:G:T	0.326	KCNN2	32810	intergenic	9.055	3a	14	15
rs13189863	12	5	113681050	rs13165130	113685001	0.964515	rs13165130	113685001	C	T	0.0493137	BMI	5:113685001:C:T	0.327	KCNN2	11640	intergenic	0.213	6	5	15
rs1425542	12	5	113874012	rs392585	113874292	0.988917	rs392585	113874292	C	T	0.0425658	BMI	5:113874292:C:T	0.2326	RP11-492A10.1	0	ncRNA_intronic	0.716	NA	9	15
rs1469249	12	5	113874012	rs392585	113837198	0.885023	rs392585	113837198	A	G	0.0444053	BMI	5:113837198:A:G	0.2316	RP11-492A10.1	0	ncRNA_intronic	0.493	6	5	15
rs1834396	12	5	113874012	rs392585	113874167	0.988917	rs392585	113874167	C	A	0.0427019	BMI	5:113874167:A:C	0.2326	RP11-492A10.1	0	ncRNA_intronic	14.32	NA	9	15
rs1834397	12	5	113874012	rs392585	113873571	0.988917	rs392585	113873571	G	A	0.0427019	BMI	5:113873571:A:G	0.2326	RP11-492A10.1	0	ncRNA_intronic	3.943	NA	9	15
rs2553482	12	5	113874012	rs392585	113978616	0.86677	rs392585	113978616	C	T	0.0453277	BMI	5:113978616:C:T	0.2525	RP11-492A10.1	0	ncRNA_intronic	0.338	NA	9	15
rs2553498	12	5	113874012	rs392585	113913104	0.977471	rs392585	113913104	A	G	0.0339994	BMI	5:113913104:A:G	0.2346	RP11-492A10.1:CTC-313D10.1	00:00:00	ncRNA_intronic	1.847	NA	9	15
rs392585	12	5	113874012	rs392585	113874012	1	rs392585	113874012	A	G	0.0263063	BMI	5:113874012:A:G	0.2306	RP11-492A10.1	0	ncRNA_intronic	7.509	NA	9	15
rs421243	12	5	113874012	rs392585	113914542	0.977471	rs392585	113914542	T	G	0.0295708	BMI	5:113914542:G:T	0.2346	RP11-492A10.1:CTC-313D10.1	00:00:00	ncRNA_intronic	0.056	NA	9	15
rs624034	12	5	113874012	rs392585	113856194	0.95483	rs392585	113856194	C	T	0.0364838	BMI	5:113856194:C:T	0.2286	RP11-492A10.1	0	ncRNA_intronic	4.674	NA	9	15
rs860815	12	5	113874012	rs392585	113874137	0.988917	rs392585	113874137	A	G	0.0438623	BMI	5:113874137:A:G	0.2326	RP11-492A10.1	0	ncRNA_intronic	2.806	NA	9	15
rs993270	12	5	113874012	rs392585	113978216	0.86677	rs392585	113978216	T	C	0.045498	BMI	5:113978216:C:T	0.2525	RP11-492A10.1	0	ncRNA_intronic	3.68	NA	9	15
rs12194004	13	6	23908557	rs12194004	23908557	1	rs12194004	23908557	C	T	0.0289212	BMI	6:23908557:C:T	0.3598	SPTLC1P2	51510	intergenic	2.001	6	5	15
rs12202439	13	6	23908557	rs12194004	23872685	0.892824	rs12194004	23872685	A	C	0.0424254	BMI	6:23872685:A:C	0.3509	SPTLC1P2	15638	intergenic	0.649	7	5	15
rs10457441	14	6	98582900	rs12206087	98572120	0.90957	rs12206087	98572120	T	C	0.0162879	BMI	6:98572120:C:T	0.4672	RP11-436D23.1	0	ncRNA_intronic	0.998	4	5	15
rs12202969	14	6	98582900	rs12206087	98576223	1	rs12206087	98576223	G	A	0.00312777	BMI	6:98576223:A:G	0.4911	RP11-436D23.1	0	ncRNA_intronic	1.218	6	5	15
rs12204181	14	6	98582900	rs12206087	98579481	0.90957	rs12206087	98579481	T	C	0.0142858	BMI	6:98579481:C:T	0.4672	RP11-436D23.1	0	ncRNA_intronic	7.468	7	5	15
rs12206087	14	6	98582900	rs12206087	98582900	1	rs12206087	98582900	G	A	0.00297946	BMI	6:98582900:A:G	0.4911	RP11-436D23.1	0	ncRNA_intronic	5.731	7	5	15
rs1487441	14	6	98582900	rs12206087	98553894	0.984117	rs12206087	98553894	G	A	0.00536213	BMI	6:98553894:A:G	0.4911	RP11-436D23.1	0	ncRNA_intronic	0.359	7	5	15
rs1872841	14	6	98582900	rs12206087	98576688	0.906169	rs12206087	98576688	C	A	0.0140219	BMI	6:98576688:A:C	0.4662	RP11-436D23.1	0	ncRNA_intronic	0.738	6	5	15
rs1906252	14	6	98582900	rs12206087	98550289	0.984151	rs12206087	98550289	C	A	0.0051507	BMI	6:98550289:A:C	0.493	RP11-436D23.1	0	ncRNA_intronic	0.052	NA	9	15
rs9375195	14	6	98582900	rs12206087	98562720	0.881788	rs12206087	98562720	G	A	0.0193339	BMI	6:98562720:A:G	0.4612	RP11-436D23.1	0	ncRNA_intronic	1.98	6	5	15
rs9375225	14	6	98582900	rs12206087	98588754	0.90957	rs12206087	98588754	G	T	0.0118665	BMI	6:98588754:G:T	0.4672	RP11-436D23.1	0	ncRNA_intronic	0.137	6	5	15
rs9385269	14	6	98582900	rs12206087	98547979	0.871564	rs12206087	98547979	C	T	0.0214046	BMI	6:98547979:C:T	0.4583	RP11-436D23.1	0	ncRNA_intronic	3.137	7	9	15
rs9401634	14	6	98582900	rs12206087	98578511	0.90957	rs12206087	98578511	T	C	0.0143507	BMI	6:98578511:C:T	0.4672	RP11-436D23.1	0	ncRNA_intronic	7.633	6	5	15
rs976681	15	7	24530016	rs976681	24530016	1	rs976681	24530016	A	G	0.0237997	BMI	7:24530016:A:G	0.2485	RNU6-1103P	46934	intergenic	13.12	5	1	15
rs10081437	16	8	8948979	rs10081437	8948979	1	rs11249905	8948979	T	C	0.0377683	BMI	8:8948979:C:T	0.497	ERI1	0	intergenic	2.131	6	5	15
rs10086521	16	8	10783769	rs10086521	10783769	1	rs7350124	10783769	T	C	0.0111076	BMI	8:10783769:C:T	0.3489	XKR6	0	intronic	0.521	1f	5	15
rs10089518	16	8	10802146	rs12546366	10839803	0.7057	rs7350124	10839803	C	T	0.0443049	BMI	8:10839803:C:T	0.4891	XKR6	0	intronic	1.947	7	9	14
rs10090800	16	8	10306432	rs10090800	10306432	1	rs11249905	10306432	C	T	0.0236467	BMI	8:10306432:C:T	0.2326	RP11-981G7.1	10609	intergenic	6.315	6	5	15
rs10093774	16	8	10712945	rs877116	10703293	0.778212	rs7350124	10703293	T	C	0.0342909	BMI	8:10703293:C:T	0.3807	RP11-177H2.2	0	ncRNA_intronic	1.286	6	5	14
rs10097870	16	8	11446680	rs11250151	11444516	0.81041	rs7350124	11444516	A	G	0.0346731	BMI	8:11444516:A:G	0.4354	LINC00208	5664	intergenic	0.019	5	5	14
rs10098699	16	8	10712945	rs877116	10676756	0.82063	rs7350124	10676756	C	T	0.0433909	BMI	8:10676756:C:T	0.3986	SOX7:SOX7:PINX1	00:00:00	intronic	5.067	4	3	4
rs10107145	16	8	10802146	rs12546366	10758213	0.858546	rs7350124	10758213	A	G	0.010601	BMI	8:10758213:A:G	0.4692	XKR6	0	intronic	0.556	7	5	15
rs10108511	16	8	11446680	rs11250151	11435516	0.773969	rs7350124	11435516	T	C	0.0428787	BMI	8:11435516:C:T	0.4384	LINC00208	0	ncRNA_intronic	1.67	5	5	14
rs10283145	16	8	10280228	rs7831557	10241411	0.784876	rs7350124	10241411	C	T	0.047721	BMI	8:10241411:C:T	0.4553	MSRA	0	intronic	2.112	5	4	15
rs1039915	16	8	8660538	rs6994038	8679614	0.903289	rs7350124	8679614	C	T	0.0339709	BMI	8:8679614:C:T	0.4414	MFHAS1	0	intronic	0.034	4	2	5
rs1039916	16	8	8660538	rs6994038	8685854	0.872505	rs7350124	8685854	G	A	0.0174391	BMI	8:8685854:A:G	0.4543	MFHAS1	0	intronic	1.488	NA	2	15
rs1045529	16	8	8850633	rs17701675	8890098	0.739736	rs11249905	8890098	T	C	0.041714	BMI	8:8890098:C:T	0.4423	ERI1	0	UTR3	2.842	6	4	5
rs10503410	16	8	10585162	rs7009920	10652352	0.868571	rs7350124	10652352	G	A	0.0393414	BMI	8:10652352:A:G	0.2058	SOX7:SOX7:PINX1	00:00:00	intronic	8.991	NA	4	5
rs10903330	16	8	10712945	rs877116	10673104	0.769552	rs7350124	10673104	A	G	0.038874	BMI	8:10673104:A:G	0.3877	SOX7:SOX7:PINX1	00:00:00	intronic	4.132	6	4	5
rs11249905	16	8	9042454	rs11249905	9042454	1	rs11249905	9042454	G	A	0.00349398	BMI	8:9042454:A:G	0.328	RP11-10A14.6	2424	intergenic	7.543	5	5	15
rs11250092	16	8	10802146	rs12546366	10786543	0.877417	rs7350124	10786543	G	A	0.00511916	BMI	8:10786543:A:G	0.4722	XKR6	0	intronic	1.287	1f	1	15
rs11250093	16	8	10802146	rs12546366	10798828	0.933435	rs7350124	10798828	T	C	0.00325373	BMI	8:10798828:C:T	0.4563	XKR6	0	intronic	1.168	1f	5	15
rs11250130	16	8	11237773	rs2736305	11214455	0.808367	rs7350124	11214455	A	G	0.0478858	BMI	8:11214455:A:G	0.4831	TDH	0	ncRNA_intronic	3.7	1f	4	14
rs11250151	16	8	11446680	rs11250151	11446680	1	rs7350124	11446680	T	C	0.0462686	BMI	8:11446680:C:T	0.4016	LINC00208	7828	intergenic	3.541	5	5	14
rs11774572	16	8	11446680	rs11250151	11446800	0.992249	rs7350124	11446800	C	T	0.0499811	BMI	8:11446800:C:T	0.4016	LINC00208	7948	intergenic	2.108	5	5	14
rs11776020	16	8	8809696	rs11776020	8809696	1	rs11249905	8809696	A	G	0.0209239	BMI	8:8809696:A:G	0.329	RP11-62H7.2	9013	intergenic	0.116	4	5	15
rs11776368	16	8	10751709	rs1529598	10783691	0.835486	rs7350124	10783691	A	G	0.0423584	BMI	8:10783691:A:G	0.2793	XKR6	0	intronic	2.018	5	5	15
rs11777976	16	8	10280228	rs7831557	10255402	0.781221	rs7350124	10255402	A	G	0.0427367	BMI	8:10255402:A:G	0.4761	MSRA	0	intronic	0.126	7	5	15
rs11778830	16	8	11446680	rs11250151	11446868	1	rs7350124	11446868	T	C	0.046785	BMI	8:11446868:C:T	0.4016	LINC00208	8016	intergenic	7.794	2b	2	14
rs11781400	16	8	11374072	rs11781400	11374072	1	rs7350124	11374072	G	T	0.0326907	BMI	8:11374072:G:T	0.3807	BLK	0	intronic	0.31	7	2	14
rs11783247	16	8	10802146	rs12546366	10788875	0.918569	rs7350124	10788875	C	T	0.00370833	BMI	8:10788875:C:T	0.4702	XKR6	0	intronic	2.201	7	9	15
rs11784052	16	8	8660538	rs6994038	8671962	0.951964	rs7350124	8671962	T	C	0.0196919	BMI	8:8671962:C:T	0.4284	MFHAS1	0	intronic	2.474	1f	4	5
rs11784144	16	8	10518691	rs11784144	10518691	1	rs7350124	10518691	A	G	0.00394979	BMI	8:10518691:A:G	0.4304	RP1L1	0	intergenic	0.685	5	5	14
rs11784393	16	8	8850633	rs17701675	8903134	0.664453	rs11249905	8903134	T	C	0.0284706	BMI	8:8903134:C:T	0.4583	ERI1	0	intergenic	0.45	7	5	15
rs11995206	16	8	11446680	rs11250151	11450133	0.957717	rs7350124	11450133	A	G	0.0471606	BMI	8:11450133:A:G	0.3966	LINC00208	11281	intergenic	0.998	5	5	14
rs11996321	16	8	10556109	rs11996321	10556109	1	rs7350124	10556109	C	T	0.036369	BMI	8:10556109:C:T	0.2366	RP1L1:C8orf74	00:00:00	intronic	0.487	4	2	15
rs11998382	16	8	10585162	rs7009920	10659517	0.862869	rs7350124	10659517	G	A	0.0478493	BMI	8:10659517:A:G	0.2048	SOX7:SOX7:PINX1	00:00:00	intronic	3.112	4	2	5
rs12155811	16	8	10585162	rs7009920	10673513	0.862869	rs7350124	10673513	T	C	0.0422203	BMI	8:10673513:C:T	0.2048	SOX7:SOX7:PINX1	00:00:00	intronic	0.532	4	2	5
rs12375394	16	8	10585162	rs7009920	10689212	0.862869	rs7350124	10689212	T	C	0.0392301	BMI	8:10689212:C:T	0.2048	SOX7:SOX7:PINX1	00:00:00	exonic	11.21	7	4	4
rs12542037	16	8	10802146	rs12546366	10758496	0.823029	rs7350124	10758496	A	G	0.00501456	BMI	8:10758496:A:G	0.4553	XKR6	0	intronic	0.127	7	5	15
rs12542733	16	8	8792426	rs6983150	8824858	0.76017	rs11249905	8824858	G	T	0.0153555	BMI	8:8824858:G:T	0.4602	RP11-62H7.2	0	ncRNA_intronic	2.74	7	5	15
rs12546366	16	8	10802146	rs12546366	10802146	1	rs7350124	10802146	T	C	0.00207166	BMI	8:10802146:C:T	0.4662	XKR6	0	intronic	6.392	5	5	15
rs12546760	16	8	8374836	rs12546760	8374836	1	rs11249905	8374836	A	G	0.0355485	BMI	8:8374836:A:G	0.492	CTD-3023L14.3	38411	intergenic	0.112	1f	5	15
rs12547955	16	8	9030387	rs453301	9035829	0.663356	rs7350124	9035829	T	G	0.0303927	BMI	8:9035829:G:T	0.498	RP11-10A14.6	1931	intergenic	0.359	3a	5	15
rs12676417	16	8	10712945	rs877116	10668634	0.814202	rs7350124	10668634	A	G	0.0404297	BMI	8:10668634:A:G	0.3966	SOX7:SOX7:PINX1	00:00:00	intronic	2.417	1f	4	5
rs12682352	16	8	8660538	rs6994038	8646246	0.887346	rs7350124	8646246	C	T	0.0117972	BMI	8:8646246:C:T	0.4483	MFHAS1	0	intronic	0.006	1d	4	5
rs12750	16	8	10585162	rs7009920	10622812	0.904322	rs7350124	10622812	A	G	0.0283587	BMI	8:10622812:A:G	0.2078	SOX7:SOX7:CTD-2135J3.3:PINX1	0:0:0:0	ncRNA_intronic	0.601	NA	4	4
rs13254263	16	8	10280228	rs7831557	10255181	0.784725	rs7350124	10255181	A	G	0.0475304	BMI	8:10255181:A:G	0.4751	MSRA	0	intronic	7.14	6	5	15
rs13259143	16	8	8809696	rs11776020	8821637	0.666915	rs11249905	8821637	G	A	0.0468142	BMI	8:8821637:A:G	0.3618	RP11-62H7.2	0	ncRNA_intronic	8.899	1f	1	15
rs13259216	16	8	8660538	rs6994038	8673601	0.896655	rs7350124	8673601	C	A	0.022374	BMI	8:8673601:A:C	0.4433	MFHAS1	0	intronic	3.727	5	4	5
rs13260067	16	8	9071033	rs13260067	9071033	1	rs11249905	9071033	G	A	0.0242683	BMI	8:9071033:A:G	0.4056	RP11-10A14.5	10668	intergenic	0.035	6	5	15
rs13270267	16	8	11446680	rs11250151	11444837	0.81115	rs7350124	11444837	T	C	0.0315578	BMI	8:11444837:C:T	0.4354	LINC00208	5985	intergenic	0.37	5	5	14
rs13272061	16	8	11347289	rs2736342	11352261	0.942016	rs7350124	11352261	G	T	0.0115517	BMI	8:11352261:G:T	0.4592	BLK	0	intronic	3.657	2b	1	15
rs1382567	16	8	11347289	rs2736342	11350899	0.93418	rs7350124	11350899	T	C	0.0106806	BMI	8:11350899:C:T	0.4573	BLK	610	upstream	6.357	4	2	15
rs1435277	16	8	11237773	rs2736305	11196970	0.821279	rs7350124	11196970	C	T	0.035472	BMI	8:11196970:C:T	0.4771	TDH	175	upstream	2.749	7	5	15
rs1529598	16	8	10751709	rs1529598	10751709	1	rs7350124	10751709	T	C	0.0158721	BMI	8:10751709:C:T	0.2982	XKR6	1845	intergenic	1.534	7	5	15
rs1533059	16	8	8660538	rs6994038	8684953	0.891758	rs7350124	8684953	A	G	0.0374068	BMI	8:8684953:A:G	0.4443	MFHAS1	0	intronic	1.584	NA	5	5
rs1562211	16	8	8850633	rs17701675	8902424	0.664453	rs11249905	8902424	A	G	0.0311502	BMI	8:8902424:A:G	0.4583	ERI1	0	intergenic	4.881	1f	5	15
rs1600250	16	8	11347289	rs2736342	11345425	0.942016	rs7350124	11345425	A	C	0.00645203	BMI	8:11345425:A:C	0.4592	BLK	6084	intergenic	5.075	7	5	15
rs1600252	16	8	11347289	rs2736342	11345644	0.942016	rs7350124	11345644	A	G	0.00645203	BMI	8:11345644:A:G	0.4592	BLK	5865	intergenic	2.304	7	5	15
rs17701675	16	8	8850633	rs17701675	8850633	1	rs11249905	8850633	A	G	0.00634899	BMI	8:8850633:A:G	0.3897	ERI1	9023	intergenic	0.888	1f	5	15
rs17709397	16	8	10280228	rs7831557	10249861	0.784999	rs7350124	10249861	G	A	0.0346647	BMI	8:10249861:A:G	0.4732	MSRA	0	intronic	4.806	4	5	15
rs17721089	16	8	10585162	rs7009920	10705438	0.841248	rs7350124	10705438	T	C	0.0234533	BMI	8:10705438:C:T	0.2048	RP11-177H2.2	1426	intergenic	8.098	6	5	14
rs17744726	16	8	11374072	rs11781400	11411823	0.743744	rs7350124	11411823	A	G	0.039595	BMI	8:11411823:A:G	0.3569	BLK	0	intronic	2.317	5	5	14
rs17765901	16	8	10280228	rs7831557	10249480	0.784033	rs7350124	10249480	G	T	0.0311046	BMI	8:10249480:G:T	0.4732	MSRA	0	intronic	1.064	5	5	15
rs17774023	16	8	10625045	rs7350124	10626333	0.971057	rs7350124	10626333	C	T	0.00441162	BMI	8:10626333:C:T	0.2843	SOX7:SOX7:CTD-2135J3.3:PINX1	0:0:0:0	ncRNA_intronic	2.002	7	4	5
rs17774331	16	8	10585162	rs7009920	10631226	0.85293	rs7350124	10631226	T	C	0.0465945	BMI	8:10631226:C:T	0.1988	SOX7:SOX7:PINX1	00:00:00	intronic	12.33	4	5	5
rs17774398	16	8	10585162	rs7009920	10632496	0.85293	rs7350124	10632496	A	G	0.0457221	BMI	8:10632496:A:G	0.1988	SOX7:SOX7:PINX1	00:00:00	intronic	0.425	7	5	5
rs17776404	16	8	10585162	rs7009920	10672829	0.862869	rs7350124	10672829	G	A	0.0408746	BMI	8:10672829:A:G	0.2048	SOX7:SOX7:PINX1	00:00:00	intronic	0.468	6	4	5
rs17776427	16	8	10585162	rs7009920	10672972	0.868809	rs7350124	10672972	A	C	0.0436596	BMI	8:10672972:A:C	0.2038	SOX7:SOX7:PINX1	00:00:00	intronic	0.932	7	4	5
rs17776497	16	8	10585162	rs7009920	10675162	0.862869	rs7350124	10675162	A	C	0.0434718	BMI	8:10675162:A:C	0.2048	SOX7:SOX7:PINX1	00:00:00	intronic	3.951	5	4	5
rs17776622	16	8	10585162	rs7009920	10676497	0.862869	rs7350124	10676497	C	T	0.0401752	BMI	8:10676497:C:T	0.2048	SOX7:SOX7:PINX1	00:00:00	intronic	2.116	4	3	4
rs17776946	16	8	10585162	rs7009920	10682674	0.851763	rs7350124	10682674	C	A	0.0401112	BMI	8:10682674:A:C	0.2068	SOX7:SOX7:PINX1	00:00:00	intronic	3.956	5	4	4
rs17778581	16	8	10802146	rs12546366	10743421	0.728426	rs7350124	10743421	T	C	0.00388785	BMI	8:10743421:C:T	0.4841	XKR6	10133	intergenic	1.014	5	5	14
rs1900102	16	8	8923585	rs1900102	8923585	1	rs1900102	8923585	C	T	0.0253834	BMI	8:8923585:C:T	0.3956	ERI1	0	intergenic	2.04	2a	1	15
rs2199690	16	8	11347289	rs2736342	11339616	0.93418	rs7350124	11339616	T	G	0.00777244	BMI	8:11339616:G:T	0.4573	FAM167A	7391	intergenic	4.371	4	5	15
rs2248932	16	8	11391650	rs2248932	11391650	1	rs2248932	11391650	A	G	0.0458531	BMI	8:11391650:A:G	0.327	BLK	0	intronic	4.724	NA	2	14
rs2409096	16	8	8660538	rs6994038	8692477	0.756781	rs7350124	8692477	C	T	0.0489785	BMI	8:8692477:C:T	0.4205	MFHAS1	0	intronic	4.006	6	5	15
rs2409654	16	8	10585162	rs7009920	10676935	0.671057	rs7350124	10676935	T	C	0.0364413	BMI	8:10676935:C:T	0.2624	SOX7:SOX7:PINX1	00:00:00	intronic	0.46	NA	3	5
rs2409655	16	8	10585162	rs7009920	10675832	0.671057	rs7350124	10675832	G	A	0.0358632	BMI	8:10675832:A:G	0.2624	SOX7:SOX7:PINX1	00:00:00	intronic	2.638	NA	4	4
rs2409676	16	8	10712945	rs877116	10722058	0.708936	rs7350124	10722058	T	C	0.033641	BMI	8:10722058:C:T	0.4394	RP11-177H2.2	18046	intergenic	1.971	NA	5	14
rs2409756	16	8	11237773	rs2736305	11242025	0.966581	rs7350124	11242025	G	T	0.0395877	BMI	8:11242025:G:T	0.4553	C8orf12	0	intronic	2.468	6	13	14
rs2409784	16	8	11347289	rs2736342	11396856	0.757406	rs7350124	11396856	C	A	0.0108487	BMI	8:11396856:A:C	0.4612	BLK	0	intronic	1.911	1d	2	15
rs2409798	16	8	11446680	rs11250151	11435564	0.782873	rs7350124	11435564	C	T	0.0360519	BMI	8:11435564:C:T	0.4473	LINC00208	0	ncRNA_intronic	2.009	5	5	14
rs2428	16	8	8660538	rs6994038	8641145	0.849096	rs7350124	8641145	T	C	0.022765	BMI	8:8641145:C:T	0.4553	MFHAS1	0	UTR3	16.03	1f	2	5
rs2572382	16	8	11237773	rs2736305	11211302	0.816858	rs7350124	11211302	T	G	0.0353303	BMI	8:11211302:G:T	0.4742	TDH	0	ncRNA_intronic	2.824	NA	5	14
rs2572446	16	8	11237773	rs2736305	11239565	0.996219	rs7350124	11239565	T	C	0.0293351	BMI	8:11239565:C:T	0.4612	C8orf12	0	intronic	2.887	NA	13	14
rs2736270	16	8	11237773	rs2736305	11192593	0.814777	rs7350124	11192593	G	A	0.0477822	BMI	8:11192593:A:G	0.4791	SLC35G5	2875	intergenic	1.855	6	5	15
rs2736288	16	8	11237773	rs2736305	11228100	0.939328	rs7350124	11228100	A	G	0.0496115	BMI	8:11228100:A:G	0.4622	C8orf12	0	intronic	1.674	7	5	14
rs2736290	16	8	11237773	rs2736305	11234298	0.958547	rs7350124	11234298	T	C	0.0483172	BMI	8:11234298:C:T	0.4672	C8orf12	0	intronic	0.087	5	5	14
rs2736305	16	8	11237773	rs2736305	11237773	1	rs7350124	11237773	C	T	0.0282677	BMI	8:11237773:C:T	0.4622	C8orf12	0	intronic	1.65	5	9	14
rs2736342	16	8	11347289	rs2736342	11347289	1	rs7350124	11347289	T	G	0.00572926	BMI	8:11347289:G:T	0.4433	BLK	4220	intergenic	5.076	1f	5	9
rs2898249	16	8	10745586	rs2898249	10745586	1	rs7350124	10745586	T	C	0.0284812	BMI	8:10745586:C:T	0.2942	XKR6	7968	intergenic	0.071	NA	5	14
rs2898290	16	8	11446680	rs11250151	11433909	0.776929	rs7350124	11433909	T	C	0.0378637	BMI	8:11433909:C:T	0.4473	LINC00208	0	ncRNA_exonic	3.539	5	5	14
rs2921040	16	8	8328101	rs2921040	8328101	1	rs11249905	8328101	C	T	0.0331239	BMI	8:8328101:C:T	0.2177	CTA-398F10.2	9253	intergenic	1.808	NA	1	15
rs2921052	16	8	8328101	rs2921040	8320071	0.977741	rs11249905	8320071	A	C	0.0442268	BMI	8:8320071:A:C	0.2217	CTA-398F10.2	1223	intergenic	8.437	NA	5	15
rs2929305	16	8	9084341	rs2929453	9085217	1	rs7350124	9085217	G	A	0.00908759	BMI	8:9085217:A:G	0.4761	RP11-10A14.8	5305	intergenic	6.447	NA	5	15
rs2929452	16	8	9084341	rs2929453	9084465	1	rs7350124	9084465	G	A	0.00849981	BMI	8:9084465:A:G	0.4761	RP11-10A14.8	6057	intergenic	7.418	NA	2	15
rs2929453	16	8	9084341	rs2929453	9084341	1	rs7350124	9084341	T	C	0.00744977	BMI	8:9084341:C:T	0.4761	RP11-10A14.8	6181	intergenic	6.277	NA	5	15
rs2929454	16	8	9084341	rs2929453	9083854	0.991989	rs7350124	9083854	A	C	0.00964712	BMI	8:9083854:A:C	0.4742	RP11-10A14.8	6668	intergenic	6.388	NA	5	15
rs2929457	16	8	9082249	rs2929457	9082249	1	rs11249905	9082249	A	C	0.0404121	BMI	8:9082249:A:C	0.3181	RP11-10A14.8	8273	intergenic	5.069	NA	5	15
rs2953802	16	8	8850633	rs17701675	8851881	0.995919	rs11249905	8851881	A	G	0.00825516	BMI	8:8851881:A:G	0.3887	ERI1	7775	intergenic	0.916	NA	2	15
rs2956244	16	8	8850633	rs17701675	8885166	0.744297	rs11249905	8885166	G	A	0.0341143	BMI	8:8885166:A:G	0.4463	ERI1	0	intronic	4.573	7	4	5
rs2980771	16	8	8328101	rs2921040	8321836	0.994328	rs11249905	8321836	G	A	0.0480375	BMI	8:8321836:A:G	0.2187	CTA-398F10.2	2988	intergenic	1.064	7	5	15
rs2980773	16	8	8328101	rs2921040	8325605	1	rs11249905	8325605	A	C	0.0467324	BMI	8:8325605:A:C	0.2177	CTA-398F10.2	6757	intergenic	0.481	1f	5	15
rs330048	16	8	9084341	rs2929453	9087278	0.991943	rs7350124	9087278	A	C	0.0114058	BMI	8:9087278:A:C	0.4742	RP11-10A14.8	3244	intergenic	0.794	1f	5	15
rs330049	16	8	9084341	rs2929453	9087299	0.972079	rs7350124	9087299	A	G	0.00793773	BMI	8:9087299:A:G	0.4692	RP11-10A14.8	3223	intergenic	0.774	1f	5	15
rs330054	16	8	9084341	rs2929453	9088291	0.991943	rs7350124	9088291	G	A	0.0124665	BMI	8:9088291:A:G	0.4742	RP11-10A14.8	2231	intergenic	10.59	5	1	15
rs3750310	16	8	10280228	rs7831557	10283426	0.957575	rs7350124	10283426	G	A	0.0211629	BMI	8:10283426:A:G	0.4612	MSRA	0	intronic	3.357	5	2	15
rs4240671	16	8	10802146	rs12546366	10767748	0.758132	rs7350124	10767748	A	G	0.00488967	BMI	8:10767748:A:G	0.4911	XKR6	0	intronic	0.285	1f	2	15
rs4240672	16	8	10802146	rs12546366	10767917	0.74047	rs7350124	10767917	A	G	0.00607386	BMI	8:10767917:A:G	0.4871	XKR6	0	intronic	6.527	5	5	15
rs4240673	16	8	10802146	rs12546366	10787612	0.929156	rs7350124	10787612	T	C	0.00347588	BMI	8:10787612:C:T	0.4672	XKR6	0	intronic	1.195	7	13	15
rs4310166	16	8	10763736	rs4310166	10763736	1	rs7350124	10763736	G	A	0.0418912	BMI	8:10763736:A:G	0.3718	XKR6	0	intronic	3.237	6	5	15
rs4368940	16	8	10518691	rs11784144	10526742	0.946178	rs7350124	10526742	T	C	0.0143692	BMI	8:10526742:C:T	0.4205	RP1L1	0	intergenic	0.355	7	5	15
rs453301	16	8	9030387	rs453301	9030387	1	rs7350124	9030387	G	T	0.0264138	BMI	8:9030387:G:T	0.4712	RP11-10A14.4	4740	intergenic	5.894	NA	2	15
rs4610752	16	8	10280228	rs7831557	10248962	0.780184	rs7350124	10248962	A	G	0.02855	BMI	8:10248962:A:G	0.4702	MSRA	0	intronic	0.663	6	5	15
rs4840567	16	8	11347289	rs2736342	11347625	0.942016	rs7350124	11347625	T	C	0.00720874	BMI	8:11347625:C:T	0.4592	BLK	3884	intergenic	10.82	1f	5	9
rs4841029	16	8	8604423	rs6985207	8605632	0.787879	rs11249905	8605632	A	G	0.0169086	BMI	8:8605632:A:G	0.4384	RP11-211C9.1	0	ncRNA_intronic	0.788	4	5	15
rs4841042	16	8	8660538	rs6994038	8664622	0.975727	rs7350124	8664622	A	G	0.0438259	BMI	8:8664622:A:G	0.4245	MFHAS1	0	intronic	0.544	1f	5	5
rs4841110	16	8	9071033	rs13260067	9086023	0.864704	rs11249905	9086023	G	A	0.0315974	BMI	8:9086023:A:G	0.4175	RP11-10A14.8	4499	intergenic	6.292	6	5	15
rs4841329	16	8	10280228	rs7831557	10253098	0.784999	rs7350124	10253098	A	G	0.0325972	BMI	8:10253098:A:G	0.4732	MSRA	0	intronic	2.48	2a	5	15
rs4841452	16	8	10712945	rs877116	10687121	0.811239	rs7350124	10687121	A	G	0.0335476	BMI	8:10687121:A:G	0.3917	SOX7:SOX7:PINX1	00:00:00	intronic	4.98	5	4	5
rs6601465	16	8	10321881	rs6601465	10321881	1	rs11249905	10321881	G	A	0.0207436	BMI	8:10321881:A:G	0.3042	RP11-981G7.2	10193	intergenic	4.988	6	5	15
rs6601529	16	8	10712945	rs877116	10670550	0.814202	rs7350124	10670550	T	C	0.0334224	BMI	8:10670550:C:T	0.3966	SOX7:SOX7:PINX1	00:00:00	intronic	1.435	6	4	5
rs6601582	16	8	11237773	rs2736305	11207367	0.785506	rs7350124	11207367	C	A	0.0487384	BMI	8:11207367:A:C	0.4881	TDH	0	ncRNA_intronic	0.318	5	2	13
rs6983150	16	8	8792426	rs6983150	8792426	1	rs11249905	8792426	A	G	0.0485613	BMI	8:8792426:A:G	0.4175	RP11-62H7.3	909	upstream	2.294	7	5	15
rs6984496	16	8	10802146	rs12546366	10796093	0.922622	rs7350124	10796093	G	T	0.00351345	BMI	8:10796093:G:T	0.4632	XKR6	0	intronic	1.627	1f	1	15
rs6985109	16	8	10802146	rs12546366	10761585	0.86138	rs7350124	10761585	G	A	0.0138768	BMI	8:10761585:A:G	0.4722	XKR6	0	intronic	1.894	1f	5	15
rs6985207	16	8	8604423	rs6985207	8604423	1	rs11249905	8604423	C	A	0.00810447	BMI	8:8604423:A:C	0.4642	RP11-211C9.1	0	ncRNA_intronic	5.408	6	5	15
rs6989160	16	8	10712945	rs877116	10705360	0.820082	rs7350124	10705360	A	C	0.0407019	BMI	8:10705360:A:C	0.3936	RP11-177H2.2	1348	intergenic	3.98	7	5	14
rs6994038	16	8	8660538	rs6994038	8660538	1	rs7350124	8660538	A	C	0.02513	BMI	8:8660538:A:C	0.4245	MFHAS1	0	intronic	0.886	7	4	5
rs7000276	16	8	10805015	rs7821914	10804843	0.828008	rs7350124	10804843	A	G	0.00513427	BMI	8:10804843:A:G	0.3887	XKR6	0	intronic	2.783	5	5	15
rs7002282	16	8	10712945	rs877116	10666993	0.814202	rs7350124	10666993	A	G	0.0486382	BMI	8:10666993:A:G	0.3966	SOX7:SOX7:PINX1	00:00:00	intronic	0.077	1f	4	5
rs7005133	16	8	8850633	rs17701675	8901222	0.679748	rs11249905	8901222	G	T	0.0142298	BMI	8:8901222:G:T	0.4602	ERI1	0	intergenic	2.444	6	5	15
rs7005363	16	8	10280228	rs7831557	10283748	0.82545	rs7350124	10283748	C	T	0.024747	BMI	8:10283748:C:T	0.4274	MSRA	0	intronic	4.232	1f	2	15
rs7009920	16	8	10585162	rs7009920	10585162	1	rs7350124	10585162	C	T	0.0141358	BMI	8:10585162:C:T	0.2117	SOX7:SOX7	00:00:00	intronic	4.501	5	1	13
rs7013277	16	8	10805015	rs7821914	10824384	0.797011	rs7350124	10824384	A	C	0.0330874	BMI	8:10824384:A:C	0.3897	XKR6	0	intronic	0.552	5	5	15
rs7015336	16	8	8850633	rs17701675	8830720	0.908823	rs11249905	8830720	A	G	0.0133947	BMI	8:8830720:A:G	0.3907	RP11-62H7.2	0	ncRNA_intronic	2.129	4	1	15
rs7016139	16	8	8850633	rs17701675	8895470	0.732513	rs11249905	8895470	T	C	0.0349652	BMI	8:8895470:C:T	0.4453	ERI1	0	intergenic	5.276	1f	5	15
rs7016385	16	8	10802146	rs12546366	10779472	0.890033	rs7350124	10779472	C	T	0.00922435	BMI	8:10779472:C:T	0.4682	XKR6	0	intronic	3.032	1f	4	9
rs720081	16	8	10585162	rs7009920	10602109	0.910135	rs7350124	10602109	C	T	0.0396934	BMI	8:10602109:C:T	0.2087	SOX7:SOX7:CTD-2135J3.3	00:00:00	ncRNA_intronic	0.312	7	9	15
rs7350075	16	8	10625045	rs7350124	10624999	0.971057	rs7350124	10624999	A	C	0.00259235	BMI	8:10624999:A:C	0.2843	SOX7:SOX7:CTD-2135J3.3:PINX1	0:0:0:0	ncRNA_intronic	3.148	6	4	5
rs7350124	16	8	10625045	rs7350124	10625045	1	rs7350124	10625045	C	T	0.00198951	BMI	8:10625045:C:T	0.2903	SOX7:SOX7:CTD-2135J3.3:PINX1	0:0:0:0	ncRNA_intronic	0.36	6	4	5
rs7817252	16	8	10585162	rs7009920	10685932	0.857564	rs7350124	10685932	A	C	0.0375119	BMI	8:10685932:A:C	0.2058	SOX7:SOX7:PINX1	00:00:00	intronic	2.174	7	4	4
rs7821826	16	8	10802146	rs12546366	10769439	0.74271	rs7350124	10769439	T	C	0.00606721	BMI	8:10769439:C:T	0.4881	XKR6	0	intronic	6.843	7	5	15
rs7821914	16	8	10805015	rs7821914	10805015	1	rs7350124	10805015	C	T	0.00354756	BMI	8:10805015:C:T	0.4314	XKR6	0	intronic	3.386	1f	5	15
rs7822109	16	8	11347289	rs2736342	11349147	0.942016	rs7350124	11349147	T	C	0.00854912	BMI	8:11349147:C:T	0.4592	BLK	2362	intergenic	1.633	2b	2	15
rs7823296	16	8	10802146	rs12546366	10778546	0.893833	rs7350124	10778546	A	G	0.00736027	BMI	8:10778546:A:G	0.4672	XKR6	0	intronic	0.204	5	5	9
rs7824675	16	8	10280228	rs7831557	10243418	0.694291	rs7350124	10243418	C	A	0.0253094	BMI	8:10243418:A:C	0.4414	MSRA	0	intronic	4.557	1f	4	15
rs7829381	16	8	11347289	rs2736342	11344573	0.942016	rs7350124	11344573	A	G	0.00730065	BMI	8:11344573:A:G	0.4592	BLK	6936	intergenic	4.394	3a	5	15
rs7831557	16	8	10280228	rs7831557	10280228	1	rs7350124	10280228	G	A	0.0192655	BMI	8:10280228:A:G	0.4523	MSRA	0	intronic	1.058	1f	5	15
rs7832968	16	8	8660538	rs6994038	8652889	0.901352	rs7350124	8652889	A	G	0.0128142	BMI	8:8652889:A:G	0.4463	MFHAS1	0	intronic	2.542	6	4	5
rs7833945	16	8	10712945	rs877116	10700266	0.809122	rs7350124	10700266	T	G	0.0434078	BMI	8:10700266:G:T	0.3907	RP11-177H2.2	0	ncRNA_intronic	7.685	5	5	14
rs7837038	16	8	10802146	rs12546366	10783074	0.747844	rs7350124	10783074	A	G	0.00301013	BMI	8:10783074:A:G	0.4861	XKR6	0	intronic	2.353	5	5	15
rs7838335	16	8	10585162	rs7009920	10589913	0.963939	rs7350124	10589913	T	C	0.0163798	BMI	8:10589913:C:T	0.2097	SOX7:SOX7:CTD-2135J3.3	00:00:00	ncRNA_intronic	8.695	4	5	13
rs7843666	16	8	10802146	rs12546366	10742059	0.726328	rs7350124	10742059	A	G	0.00505253	BMI	8:10742059:A:G	0.4831	XKR6	11495	intergenic	0.854	7	5	14
rs876954	16	8	8310923	rs876954	8310923	1	rs7350124	8310923	A	G	0.0488147	BMI	8:8310923:A:G	0.4801	CTA-398F10.2	3495	intergenic	3.98	NA	5	15
rs877116	16	8	10712945	rs877116	10712945	1	rs7350124	10712945	G	T	0.00954469	BMI	8:10712945:G:T	0.4215	RP11-177H2.2	8933	intergenic	1.926	NA	2	14
rs891558	16	8	10585162	rs7009920	10623771	0.904322	rs7350124	10623771	A	G	0.0353018	BMI	8:10623771:A:G	0.2078	SOX7:SOX7:CTD-2135J3.3:PINX1	0:0:0:0	ncRNA_intronic	1.355	5	4	5
rs907181	16	8	8660538	rs6994038	8702875	0.710942	rs7350124	8702875	C	T	0.0494004	BMI	8:8702875:C:T	0.4165	MFHAS1	0	intronic	0.501	2b	2	7
rs9329221	16	8	10280228	rs7831557	10240202	0.743185	rs7350124	10240202	T	G	0.0357443	BMI	8:10240202:G:T	0.4135	MSRA	0	intronic	7.724	1f	5	15
rs978803	16	8	11347289	rs2736342	11343475	0.938186	rs7350124	11343475	A	G	0.00681183	BMI	8:11343475:A:G	0.4583	BLK	8034	intergenic	2.616	6	5	15
rs978804	16	8	11347289	rs2736342	11343673	0.942016	rs7350124	11343673	C	T	0.00695168	BMI	8:11343673:C:T	0.4592	BLK	7836	intergenic	0.375	6	5	15
rs9969626	16	8	10712945	rs877116	10670801	0.814202	rs7350124	10670801	A	C	0.0318132	BMI	8:10670801:A:C	0.3966	SOX7:SOX7:PINX1	00:00:00	intronic	5.3	7	2	5
rs11782215	17	8	142629949	rs7357604	142647688	0.934478	rs7357604	142647688	A	G	0.0188608	BMI	8:142647688:A:G	0.3519	AC138647.1	118850	intergenic	1.195	5	5	15
rs12549680	17	8	142629949	rs7357604	142633630	0.983097	rs7357604	142633630	T	C	0.018272	BMI	8:142633630:C:T	0.3638	AC138647.1	104792	intergenic	0.823	5	5	15
rs2379268	17	8	142629949	rs7357604	142640905	0.95857	rs7357604	142640905	A	G	0.0189738	BMI	8:142640905:A:G	0.3579	AC138647.1	112067	intergenic	0.131	5	5	9
rs7357604	17	8	142629949	rs7357604	142629949	1	rs7357604	142629949	G	A	0.0111105	BMI	8:142629949:A:G	0.3678	AC138647.1	101111	intergenic	0.689	5	5	14
rs7846428	17	8	142629949	rs7357604	142639657	0.949833	rs7357604	142639657	A	G	0.0230525	BMI	8:142639657:A:G	0.3598	AC138647.1	110819	intergenic	0.411	4	5	15
rs12347982	18	9	31030360	rs12347982	31030360	1	rs12347982	31030360	A	C	0.0169003	BMI	9:31030360:A:C	0.2286	HSPA8P17	39789	intergenic	1.111	7	5	15
rs1576802	18	9	31030360	rs12347982	31005192	0.836407	rs12347982	31005192	T	C	0.0480133	BMI	9:31005192:C:T	0.2137	HSPA8P17	14621	intergenic	2.195	NA	7	15
rs17720893	18	9	31030360	rs12347982	31029867	1	rs12347982	31029867	A	G	0.0217657	BMI	9:31029867:A:G	0.2286	HSPA8P17	39296	intergenic	0.081	7	5	15
rs17720922	18	9	31030360	rs12347982	31030917	0.98823	rs12347982	31030917	T	C	0.0235568	BMI	9:31030917:C:T	0.2266	HSPA8P17	40346	intergenic	2.601	4	1	15
rs4878458	18	9	31030360	rs12347982	31003975	0.841634	rs12347982	31003975	C	T	0.0478432	BMI	9:31003975:C:T	0.2147	HSPA8P17	13404	intergenic	0.004	7	9	15
rs7024400	18	9	31030360	rs12347982	30982465	0.809503	rs12347982	30982465	T	C	0.03499	BMI	9:30982465:C:T	0.2127	HSPA8P17	5617	intergenic	1.935	5	9	15
rs7047777	18	9	31030360	rs12347982	30984462	0.794753	rs12347982	30984462	G	T	0.0466944	BMI	9:30984462:G:T	0.2117	HSPA8P17	3620	intergenic	0.696	7	9	15
rs7112357	19	11	131981029	rs7112357	131981029	1	rs7112357	131981029	G	A	0.046622	BMI	11:131981029:A:G	0.2903	NTM	0	intronic	0.46	6	5	15
rs6504550	20	17	65988049	rs9891146	65894542	0.963495	rs9891146	65894542	G	A	0.0461219	BMI	17:65894542:A:G	0.2694	BPTF	0	intronic	0.933	7	4	4
rs9891146	20	17	65988049	rs9891146	65988049	1	rs9891146	65988049	T	C	0.0375482	BMI	17:65988049:C:T	0.2714	C17orf58	0	exonic	5.191	4	4	5
rs6092143	21	20	54181875	rs6092143	54181875	1	rs6092143	54181875	T	C	0.0391892	BMI	20:54181875:C:T	0.3678	RP5-1010E17.1	97122	intergenic	2.612	6	9	15
rs112635299	1	14	94838142	rs112635299	94838142	1	rs112635299	94838142	NA	G	0.00199771	CAD	14:94838142:G:T	0.0169	SERPINA1	4941	intergenic	0.272	5	5	15
rs28929474	1	14	94838142	rs112635299	94844947	0.881944	rs112635299	94844947	NA	C	0.00833642	CAD	14:94844947:C:T	0.0169	SERPINA1	0	exonic	20.2	NA	4	15
rs1348804	1	2	63898428	rs2604615	63895672	1	rs2604615	63895672	C	T	0.0426061	DBP	2:63895672:C:T	0.2982	WDPCP	0	intergenic	1.282	5	2	15
rs1900303	1	2	63898428	rs2604615	63897260	1	rs2604615	63897260	C	T	0.0379114	DBP	2:63897260:C:T	0.2982	WDPCP	0	intergenic	1.749	7	5	15
rs2592387	1	2	63898428	rs2604615	63894834	1	rs2604615	63894834	C	T	0.0371527	DBP	2:63894834:C:T	0.2982	WDPCP	0	intergenic	0.707	7	5	15
rs2604615	1	2	63898428	rs2604615	63898428	1	rs2604615	63898428	T	C	0.0358814	DBP	2:63898428:C:T	0.2982	WDPCP	0	intergenic	6.697	6	5	15
rs262511	1	2	63898428	rs2604615	63889944	1	rs2604615	63889944	C	A	0.0401641	DBP	2:63889944:A:C	0.2982	WDPCP	0	intergenic	6.912	5	2	15
rs262512	1	2	63898428	rs2604615	63890260	1	rs2604615	63890260	T	C	0.0399828	DBP	2:63890260:C:T	0.2982	WDPCP	0	intergenic	5.35	5	2	15
rs262517	1	2	63898428	rs2604615	63891261	1	rs2604615	63891261	G	T	0.0371103	DBP	2:63891261:G:T	0.2982	WDPCP	0	intergenic	6.535	5	4	15
rs262531	1	2	63898428	rs2604615	63904951	1	rs2604615	63904951	A	C	0.0380208	DBP	2:63904951:A:C	0.2982	WDPCP	0	intergenic	4.112	6	5	15
rs262532	1	2	63898428	rs2604615	63906020	1	rs2604615	63906020	G	A	0.0368251	DBP	2:63906020:A:G	0.2982	WDPCP	0	intergenic	4.446	7	5	15
rs262537	1	2	63898428	rs2604615	63907331	1	rs2604615	63907331	C	T	0.0437282	DBP	2:63907331:C:T	0.2982	WDPCP	0	intergenic	0.089	7	5	15
rs262539	1	2	63898428	rs2604615	63908270	1	rs2604615	63908270	A	G	0.0402449	DBP	2:63908270:A:G	0.2982	WDPCP	0	intergenic	3.647	7	5	15
rs10189777	2	2	140324444	rs35835668	140299689	0.847864	rs35835668	140299689	G	A	0.0311861	DBP	2:140299689:A:G	0.2058	SNORA72	30563	intergenic	0.235	7	5	15
rs12053077	2	2	140324444	rs35835668	140265454	0.832818	rs35835668	140265454	G	A	0.0348722	DBP	2:140265454:A:G	0.2087	SNORA72	3539	intergenic	3.857	6	9	15
rs13025522	2	2	140324444	rs35835668	140262849	0.695876	rs35835668	140262849	G	A	0.0399291	DBP	2:140262849:A:G	0.1809	SNORA72	6144	intergenic	9.923	7	9	15
rs17714216	2	2	140324444	rs35835668	140271492	0.847864	rs35835668	140271492	C	A	0.0303781	DBP	2:140271492:A:C	0.2058	SNORA72	2366	intergenic	1.541	7	15	15
rs1837160	2	2	140324444	rs35835668	140423692	0.937538	rs35835668	140423692	A	G	0.0400388	DBP	2:140423692:A:G	0.2316	MRPS18BP2	2423	intergenic	1.784	7	5	15
rs2164855	2	2	140324444	rs35835668	140415379	0.937538	rs35835668	140415379	G	T	0.0406703	DBP	2:140415379:G:T	0.2316	MRPS18BP2	10736	intergenic	1.073	5	9	15
rs34147551	2	2	140324444	rs35835668	140357018	0.936936	rs35835668	140357018	G	A	0.0401969	DBP	2:140357018:A:G	0.2296	MRPS18BP2	69097	intergenic	1.094	7	9	15
rs34150606	2	2	140324444	rs35835668	140313940	0.857242	rs35835668	140313940	A	G	0.0393467	DBP	2:140313940:A:G	0.2078	SNORA72	44814	intergenic	4.711	6	15	15
rs35835668	2	2	140324444	rs35835668	140324444	1	rs35835668	140324444	A	G	0.0188916	DBP	2:140324444:A:G	0.2256	SNORA72	55318	intergenic	0.151	7	9	15
rs62172365	2	2	140324444	rs35835668	140299077	0.847864	rs35835668	140299077	T	C	0.0307871	DBP	2:140299077:C:T	0.2058	SNORA72	29951	intergenic	4.661	6	5	15
rs62172389	2	2	140324444	rs35835668	140378190	0.937538	rs35835668	140378190	A	C	0.0425081	DBP	2:140378190:A:C	0.2316	MRPS18BP2	47925	intergenic	2.895	5	9	15
rs6756387	2	2	140324444	rs35835668	140355032	0.937538	rs35835668	140355032	G	A	0.0360395	DBP	2:140355032:A:G	0.2316	MRPS18BP2	71083	intergenic	0.29	6	9	15
rs7596468	2	2	140324444	rs35835668	140376664	0.937538	rs35835668	140376664	C	T	0.0428762	DBP	2:140376664:C:T	0.2316	MRPS18BP2	49451	intergenic	4.15	6	9	15
rs7597242	2	2	140324444	rs35835668	140252390	0.685654	rs35835668	140252390	G	A	0.0415815	DBP	2:140252390:A:G	0.1789	SNORA72	16603	intergenic	8.065	7	5	15
rs1111212	3	2	159388986	rs2883872	159312733	0.964524	rs2883872	159312733	C	T	0.0300415	DBP	2:159312733:C:T	0.3757	CCDC148	0	intronic	7.517	4	1	2
rs1118906	3	2	159388986	rs2883872	159361353	0.935132	rs2883872	159361353	C	A	0.0193531	DBP	2:159361353:A:C	0.3857	PKP4	0	intronic	1.485	5	5	5
rs1125661	3	2	159388986	rs2883872	159316583	0.964524	rs2883872	159316583	A	G	0.0286142	DBP	2:159316583:A:G	0.3757	PKP4	0	intronic	3.852	7	1	7
rs1125843	3	2	159388986	rs2883872	159340038	0.93172	rs2883872	159340038	C	T	0.0176197	DBP	2:159340038:C:T	0.3867	PKP4	0	intronic	0.852	5	5	5
rs1972608	3	2	159388986	rs2883872	159314312	0.964524	rs2883872	159314312	C	T	0.0290872	DBP	2:159314312:C:T	0.3757	PKP4	0	UTR5	14.67	2b	1	1
rs1986307	3	2	159388986	rs2883872	159340810	0.93172	rs2883872	159340810	C	T	0.0156473	DBP	2:159340810:C:T	0.3867	PKP4	0	intronic	2.325	6	5	5
rs2013583	3	2	159388986	rs2883872	159310846	0.964524	rs2883872	159310846	G	T	0.0310115	DBP	2:159310846:G:T	0.3757	CCDC148	0	intronic	3.774	NA	5	15
rs2356186	3	2	159388986	rs2883872	159364472	0.935132	rs2883872	159364472	T	C	0.0173539	DBP	2:159364472:C:T	0.3857	PKP4	0	intronic	4.794	4	5	5
rs2883872	3	2	159388986	rs2883872	159388986	1	rs2883872	159388986	G	A	0.0133592	DBP	2:159388986:A:G	0.3688	PKP4	0	intronic	0.61	7	5	5
rs3755402	3	2	159388986	rs2883872	159390454	0.935132	rs2883872	159390454	A	G	0.0148441	DBP	2:159390454:A:G	0.3857	PKP4	0	intronic	1.407	6	4	5
rs3771594	3	2	159388986	rs2883872	159393208	0.93172	rs2883872	159393208	C	T	0.0157769	DBP	2:159393208:C:T	0.3867	PKP4	0	intronic	6.04	7	4	5
rs3771599	3	2	159388986	rs2883872	159397428	0.93172	rs2883872	159397428	C	T	0.015297	DBP	2:159397428:C:T	0.3867	PKP4	0	intronic	14.59	6	4	5
rs3771602	3	2	159388986	rs2883872	159406250	0.931453	rs2883872	159406250	A	G	0.0169963	DBP	2:159406250:A:G	0.3867	PKP4	0	intronic	5.273	6	4	5
rs4664964	3	2	159388986	rs2883872	159341805	0.93172	rs2883872	159341805	C	T	0.017044	DBP	2:159341805:C:T	0.3867	PKP4	0	intronic	0.275	3a	5	5
rs6437184	3	2	159388986	rs2883872	159354852	0.93172	rs2883872	159354852	C	T	0.0172515	DBP	2:159354852:C:T	0.3867	PKP4	0	intronic	0.32	5	5	5
rs6710184	3	2	159388986	rs2883872	159319410	0.895093	rs2883872	159319410	G	A	0.024168	DBP	2:159319410:A:G	0.3926	PKP4	0	intronic	2.229	7	5	5
rs6711582	3	2	159388986	rs2883872	159327935	0.992043	rs2883872	159327935	A	G	0.0203682	DBP	2:159327935:A:G	0.3688	PKP4	0	intronic	18.21	6	4	5
rs6730686	3	2	159388986	rs2883872	159374984	0.93172	rs2883872	159374984	G	A	0.013523	DBP	2:159374984:A:G	0.3867	PKP4	0	intronic	4.224	2b	5	15
rs6743102	3	2	159388986	rs2883872	159378458	0.93172	rs2883872	159378458	G	A	0.0135091	DBP	2:159378458:A:G	0.3867	PKP4	0	intronic	1.291	6	4	15
rs6744474	3	2	159388986	rs2883872	159371625	0.92366	rs2883872	159371625	C	A	0.0140421	DBP	2:159371625:A:C	0.3847	PKP4	0	intronic	1.436	5	5	15
rs6757576	3	2	159388986	rs2883872	159360533	0.935132	rs2883872	159360533	A	G	0.0193531	DBP	2:159360533:A:G	0.3857	PKP4	0	intronic	4.224	5	2	5
rs7601197	3	2	159388986	rs2883872	159333024	0.996023	rs2883872	159333024	C	T	0.0188098	DBP	2:159333024:C:T	0.3698	PKP4	0	intronic	1.998	6	4	5
rs9288715	3	2	159388986	rs2883872	159336954	0.996023	rs2883872	159336954	C	T	0.0186195	DBP	2:159336954:C:T	0.3698	PKP4	0	intronic	0.474	7	4	5
rs10936139	4	3	158152073	rs11707386	158138935	0.969271	rs11707386	158138935	C	T	0.0451174	DBP	3:158138935:C:T	0.2376	RSRC1	0	intronic	4.204	3a	1	15
rs11707386	4	3	158152073	rs11707386	158152073	1	rs11707386	158152073	A	G	0.022935	DBP	3:158152073:A:G	0.2416	RSRC1	0	intronic	0.928	7	5	15
rs11719124	4	3	158152073	rs11707386	158143726	0.969271	rs11707386	158143726	A	G	0.045924	DBP	3:158143726:A:G	0.2376	RSRC1	0	intronic	2.438	6	5	15
rs12493128	4	3	158152073	rs11707386	158166097	0.969271	rs11707386	158166097	C	T	0.0419196	DBP	3:158166097:C:T	0.2376	RSRC1	0	intronic	1.509	6	5	15
rs12496934	4	3	158152073	rs11707386	158149561	0.964251	rs11707386	158149561	A	G	0.0451366	DBP	3:158149561:A:G	0.2386	RSRC1	0	intronic	0.893	6	5	15
rs4680413	4	3	158152073	rs11707386	157852128	0.93405	rs11707386	157852128	G	A	0.0434193	DBP	3:157852128:A:G	0.2386	RSRC1	0	intronic	0.236	5	4	5
rs4680435	4	3	158152073	rs11707386	158158365	0.969271	rs11707386	158158365	A	G	0.0420867	DBP	3:158158365:A:G	0.2376	RSRC1	0	intronic	3.373	6	5	15
rs73172105	4	3	158152073	rs11707386	158144223	0.969271	rs11707386	158144223	G	A	0.0459006	DBP	3:158144223:A:G	0.2376	RSRC1	0	intronic	6.127	7	5	15
rs7624303	4	3	158152073	rs11707386	157851223	0.93405	rs11707386	157851223	G	A	0.0434193	DBP	3:157851223:A:G	0.2386	RSRC1	0	intronic	17.6	5	4	5
rs227282	5	4	103607806	rs227285	103606886	0.995765	rs227375	103606886	C	A	0.0485365	DBP	4:103606886:A:C	0.333	MANBA	0	intronic	0.017	NA	4	5
rs227285	5	4	103607806	rs227285	103607806	1	rs227375	103607806	C	T	0.0462171	DBP	4:103607806:C:T	0.334	MANBA	0	intronic	0.493	NA	2	5
rs227365	5	4	103607806	rs227285	103610872	1	rs227375	103610872	A	G	0.0494615	DBP	4:103610872:A:G	0.334	MANBA	0	intronic	2.521	NA	4	5
rs227366	5	4	103607806	rs227285	103611364	1	rs227375	103611364	G	A	0.0496771	DBP	4:103611364:A:G	0.334	MANBA	0	intronic	0.708	NA	4	5
rs227368	5	4	103618023	rs227375	103611845	0.865516	rs227375	103611845	T	C	0.0296053	DBP	4:103611845:C:T	0.497	MANBA	0	exonic	10.51	NA	4	5
rs227372	5	4	103607806	rs227285	103612917	0.995765	rs227375	103612917	T	C	0.0476724	DBP	4:103612917:C:T	0.333	MANBA	0	intronic	0.773	NA	4	5
rs227373	5	4	103607806	rs227285	103613266	0.98734	rs227375	103613266	A	G	0.0498263	DBP	4:103613266:A:G	0.331	MANBA	0	intronic	1.262	NA	4	5
rs227374	5	4	103607806	rs227285	103613299	1	rs227375	103613299	A	G	0.0483273	DBP	4:103613299:A:G	0.334	MANBA	0	intronic	3.325	NA	4	5
rs227375	5	4	103618023	rs227375	103618023	1	rs227375	103618023	T	C	0.0259567	DBP	4:103618023:C:T	0.4702	MANBA	0	intronic	0.933	NA	2	15
rs1005993	6	5	77766019	rs11750781	77815461	0.691739	rs11750781	77815461	G	A	0.0453332	DBP	5:77815461:A:G	0.2624	LHFPL2	0	intronic	5.185	NA	5	7
rs11742387	6	5	77766019	rs11750781	77814525	0.685893	rs11750781	77814525	A	G	0.0471943	DBP	5:77814525:A:G	0.2644	LHFPL2	0	intronic	5.911	4	2	7
rs11750781	6	5	77766019	rs11750781	77766019	1	rs11750781	77766019	C	T	0.0294151	DBP	5:77766019:C:T	0.2286	SCAMP1	0	intronic	8.226	3a	5	5
rs405161	7	5	113845984	rs434517	113846546	0.966201	rs434517	113846546	C	T	0.0440089	DBP	5:113846546:C:T	0.2296	RP11-492A10.1	0	ncRNA_intronic	2.051	7	14	15
rs434517	7	5	113845984	rs434517	113845984	1	rs434517	113845984	A	C	0.0305926	DBP	5:113845984:A:C	0.2237	RP11-492A10.1	0	ncRNA_intronic	8.066	NA	14	15
rs13162269	8	5	127818890	rs13162269	127818890	1	rs463035	127818890	G	T	0.0489875	DBP	5:127818890:G:T	0.2793	FBN2	0	intronic	2.998	7	4	15
rs463035	8	5	127657056	rs463035	127657056	1	rs463035	127657056	A	G	0.0262296	DBP	5:127657056:A:G	0.3042	FBN2	0	intronic	1.882	7	5	15
rs1144696	9	6	16753147	rs16879023	16742925	0.888025	rs16879023	16742925	G	A	0.0175104	DBP	6:16742925:A:G	0.164	ATXN1	0	intronic	4.785	7	4	5
rs1144698	9	6	16753147	rs16879023	16743334	0.740938	rs16879023	16743334	G	A	0.0352151	DBP	6:16743334:A:G	0.1928	ATXN1	0	intronic	4.98	NA	4	5
rs1144699	9	6	16753147	rs16879023	16743425	0.740938	rs16879023	16743425	C	T	0.0349499	DBP	6:16743425:C:T	0.1928	ATXN1	0	intronic	4.759	NA	4	5
rs1150639	9	6	16753147	rs16879023	16743776	0.916034	rs16879023	16743776	T	C	0.0162618	DBP	6:16743776:C:T	0.164	ATXN1	0	intronic	2.284	NA	4	5
rs1322599	9	6	16753147	rs16879023	16758425	0.806335	rs16879023	16758425	T	C	0.0161737	DBP	6:16758425:C:T	0.1819	ATXN1	0	intronic	6.432	5	1	7
rs16879023	9	6	16753147	rs16879023	16753147	1	rs16879023	16753147	A	G	0.004024	DBP	6:16753147:A:G	0.1521	ATXN1	0	intronic	3.569	4	1	7
rs2301594	9	6	16753147	rs16879023	16754366	0.817481	rs16879023	16754366	A	G	0.026223	DBP	6:16754366:A:G	0.1799	ATXN1	0	intronic	4.435	NA	4	5
rs3793118	9	6	16753147	rs16879023	16737046	0.77144	rs16879023	16737046	A	G	0.0103536	DBP	6:16737046:A:G	0.1521	ATXN1	0	intronic	11.02	3a	1	7
rs6915310	9	6	16753147	rs16879023	16758002	0.806335	rs16879023	16758002	T	C	0.0210274	DBP	6:16758002:C:T	0.1819	ATXN1	0	intronic	1.847	5	1	5
rs76654064	9	6	16753147	rs16879023	16731452	0.715377	rs16879023	16731452	A	G	0.0121507	DBP	6:16731452:A:G	0.1461	ATXN1	0	intronic	4.103	4	2	7
rs16867690	10	6	29583846	rs28749528	29585383	1	rs28749528	29585383	T	C	0.0182209	DBP	6:29585383:C:T	0.09742	GABBR1	0	intronic	2.705	7	4	5
rs17178014	10	6	29583846	rs28749528	29593093	1	rs28749528	29593093	G	T	0.0192076	DBP	6:29593093:G:T	0.09742	GABBR1	0	intronic	14.37	5	1	5
rs17184416	10	6	29583846	rs28749528	29593478	1	rs28749528	29593478	G	A	0.0191561	DBP	6:29593478:A:G	0.09742	GABBR1	0	intronic	8.356	5	1	5
rs17842396	10	6	29583846	rs28749528	29586384	1	rs28749528	29586384	C	T	0.0251914	DBP	6:29586384:C:T	0.09742	GABBR1	0	intronic	3.61	5	4	4
rs17854216	10	6	29583846	rs28749528	29581113	1	rs28749528	29581113	G	A	0.0162915	DBP	6:29581113:A:G	0.09742	GABBR1	0	exonic	0.045	5	4	4
rs17854217	10	6	29583846	rs28749528	29581110	1	rs28749528	29581110	G	A	0.0234717	DBP	6:29581110:A:G	0.09742	GABBR1	0	exonic	0.53	5	4	4
rs2021749	10	6	29583846	rs28749528	29598119	1	rs28749528	29598119	A	G	0.0170988	DBP	6:29598119:A:G	0.09742	GABBR1	0	intronic	1.823	NA	1	5
rs2058326	10	6	29583846	rs28749528	29582607	1	rs28749528	29582607	T	G	0.0194315	DBP	6:29582607:G:T	0.09742	GABBR1	0	intronic	2.559	NA	4	5
rs28359967	10	6	29583846	rs28749528	29580265	1	rs28749528	29580265	T	G	0.0250408	DBP	6:29580265:G:T	0.09742	GABBR1	0	intronic	0.066	6	4	4
rs28359969	10	6	29583846	rs28749528	29584546	1	rs28749528	29584546	G	A	0.0198859	DBP	6:29584546:A:G	0.09742	GABBR1	0	intronic	2.464	5	4	5
rs28359971	10	6	29583846	rs28749528	29584888	1	rs28749528	29584888	C	A	0.0197788	DBP	6:29584888:A:C	0.09742	GABBR1	0	intronic	12.12	5	4	5
rs28359972	10	6	29583846	rs28749528	29585204	1	rs28749528	29585204	G	A	0.0195717	DBP	6:29585204:A:G	0.09742	GABBR1	0	intronic	0.551	6	4	5
rs28359974	10	6	29583846	rs28749528	29585684	1	rs28749528	29585684	C	T	0.0199534	DBP	6:29585684:C:T	0.09742	GABBR1	0	intronic	5.455	5	4	5
rs28359975	10	6	29583846	rs28749528	29586182	1	rs28749528	29586182	G	A	0.0198859	DBP	6:29586182:A:G	0.09742	GABBR1	0	intronic	4.671	4	4	4
rs28359976	10	6	29583846	rs28749528	29586717	1	rs28749528	29586717	G	A	0.0248247	DBP	6:29586717:A:G	0.09742	GABBR1	0	intronic	7.252	7	4	4
rs28359977	10	6	29583846	rs28749528	29586812	1	rs28749528	29586812	A	G	0.0250974	DBP	6:29586812:A:G	0.09742	GABBR1	0	intronic	6.413	6	4	4
rs28359982	10	6	29583846	rs28749528	29592645	1	rs28749528	29592645	C	T	0.0192076	DBP	6:29592645:C:T	0.09742	GABBR1	0	intronic	8.622	4	1	5
rs28359983	10	6	29583846	rs28749528	29592679	1	rs28749528	29592679	A	G	0.0197102	DBP	6:29592679:A:G	0.09742	GABBR1	0	intronic	3.889	4	1	5
rs28359984	10	6	29583846	rs28749528	29592690	1	rs28749528	29592690	A	C	0.0194415	DBP	6:29592690:A:C	0.09742	GABBR1	0	intronic	8.344	4	1	5
rs28359987	10	6	29583846	rs28749528	29594449	1	rs28749528	29594449	C	A	0.018821	DBP	6:29594449:A:C	0.09742	GABBR1	0	intronic	0.988	5	1	5
rs28749525	10	6	29583846	rs28749528	29583342	1	rs28749528	29583342	T	C	0.0207231	DBP	6:29583342:C:T	0.09742	GABBR1	0	intronic	0.083	6	4	5
rs28749527	10	6	29583846	rs28749528	29583750	1	rs28749528	29583750	A	G	0.0194617	DBP	6:29583750:A:G	0.09742	GABBR1	0	intronic	11.04	7	4	5
rs28749528	10	6	29583846	rs28749528	29583846	1	rs28749528	29583846	T	C	0.0159787	DBP	6:29583846:C:T	0.09742	GABBR1	0	intronic	5.148	7	4	5
rs28749529	10	6	29583846	rs28749528	29584200	1	rs28749528	29584200	T	C	0.0197984	DBP	6:29584200:C:T	0.09742	GABBR1	0	intronic	3.038	7	4	5
rs28749530	10	6	29583846	rs28749528	29584221	1	rs28749528	29584221	G	A	0.0197593	DBP	6:29584221:A:G	0.09742	GABBR1	0	intronic	3.409	7	4	5
rs29222	10	6	29583846	rs28749528	29590952	0.988251	rs28749528	29590952	C	A	0.0197004	DBP	6:29590952:A:C	0.09642	GABBR1	0	intronic	0.916	NA	3	4
rs29223	10	6	29583846	rs28749528	29588544	1	rs28749528	29588544	C	A	0.0208734	DBP	6:29588544:A:C	0.09742	GABBR1	0	intronic	1.862	NA	4	4
rs29225	10	6	29583846	rs28749528	29581041	1	rs28749528	29581041	G	A	0.016362	DBP	6:29581041:A:G	0.09742	GABBR1	0	exonic	12.81	NA	4	4
rs29226	10	6	29583846	rs28749528	29581011	1	rs28749528	29581011	G	T	0.0201254	DBP	6:29581011:G:T	0.09742	GABBR1	0	intronic	6.58	NA	4	4
rs29227	10	6	29583846	rs28749528	29580588	1	rs28749528	29580588	T	G	0.0184428	DBP	6:29580588:G:T	0.09742	GABBR1	0	intronic	16.62	NA	4	4
rs29229	10	6	29583846	rs28749528	29575858	1	rs28749528	29575858	G	A	0.0193506	DBP	6:29575858:A:G	0.09742	GABBR1	0	intronic	5.026	5	4	4
rs29245	10	6	29583846	rs28749528	29590597	0.988251	rs28749528	29590597	T	C	0.0192076	DBP	6:29590597:C:T	0.09642	GABBR1	0	intronic	1.552	NA	3	4
rs29251	10	6	29583846	rs28749528	29581757	1	rs28749528	29581757	G	A	0.0237341	DBP	6:29581757:A:G	0.09742	GABBR1	0	intronic	4.077	NA	4	4
rs29253	10	6	29583846	rs28749528	29580436	1	rs28749528	29580436	G	A	0.0260582	DBP	6:29580436:A:G	0.09742	GABBR1	0	intronic	12.53	NA	4	4
rs29257	10	6	29583846	rs28749528	29578030	1	rs28749528	29578030	G	A	0.0216212	DBP	6:29578030:A:G	0.09742	GABBR1	0	intronic	3.34	NA	4	4
rs29258	10	6	29583846	rs28749528	29577617	1	rs28749528	29577617	T	C	0.0205992	DBP	6:29577617:C:T	0.09742	GABBR1	0	intronic	9.574	NA	4	4
rs29261	10	6	29583846	rs28749528	29576198	1	rs28749528	29576198	G	A	0.0218715	DBP	6:29576198:A:G	0.09742	GABBR1	0	intronic	12.44	NA	4	4
rs29262	10	6	29583846	rs28749528	29576592	1	rs28749528	29576592	G	A	0.0186819	DBP	6:29576592:A:G	0.09742	GABBR1	0	intronic	7.188	NA	3	4
rs29263	10	6	29583846	rs28749528	29576590	1	rs28749528	29576590	A	G	0.0194617	DBP	6:29576590:A:G	0.09742	GABBR1	0	intronic	0.122	7	3	4
rs3025626	10	6	29583846	rs28749528	29591864	0.988251	rs28749528	29591864	A	G	0.0170221	DBP	6:29591864:A:G	0.09642	GABBR1	0	intronic	7.597	NA	2	5
rs6919973	10	6	29583846	rs28749528	29587874	1	rs28749528	29587874	T	C	0.0213352	DBP	6:29587874:C:T	0.09742	GABBR1	0	intronic	3.908	5	4	4
rs740881	10	6	29583846	rs28749528	29575567	1	rs28749528	29575567	A	G	0.0189898	DBP	6:29575567:A:G	0.09742	GABBR1	0	intronic	0.244	NA	4	4
rs740882	10	6	29583846	rs28749528	29575456	1	rs28749528	29575456	T	C	0.0160952	DBP	6:29575456:C:T	0.09742	GABBR1	0	intronic	0.113	NA	4	4
rs881284	10	6	29583846	rs28749528	29576047	1	rs28749528	29576047	T	C	0.0172245	DBP	6:29576047:C:T	0.09742	GABBR1	0	intronic	1.578	5	4	4
rs10457441	11	6	98555272	rs9375188	98572120	0.898629	rs9375188	98572120	T	C	0.0236123	DBP	6:98572120:C:T	0.4672	RP11-436D23.1	0	ncRNA_intronic	0.998	4	5	15
rs12202969	11	6	98555272	rs9375188	98576223	0.988112	rs9375188	98576223	G	A	0.0299724	DBP	6:98576223:A:G	0.4911	RP11-436D23.1	0	ncRNA_intronic	1.218	6	5	15
rs12204181	11	6	98555272	rs9375188	98579481	0.898629	rs9375188	98579481	T	C	0.023586	DBP	6:98579481:C:T	0.4672	RP11-436D23.1	0	ncRNA_intronic	7.468	7	5	15
rs12206087	11	6	98555272	rs9375188	98582900	0.988112	rs9375188	98582900	G	A	0.0316622	DBP	6:98582900:A:G	0.4911	RP11-436D23.1	0	ncRNA_intronic	5.731	7	5	15
rs13208578	11	6	98555272	rs9375188	98572976	0.898629	rs9375188	98572976	C	T	0.0234186	DBP	6:98572976:C:T	0.4672	RP11-436D23.1	0	ncRNA_intronic	13.04	5	7	15
rs1487441	11	6	98555272	rs9375188	98553894	0.996038	rs9375188	98553894	G	A	0.0228298	DBP	6:98553894:A:G	0.4911	RP11-436D23.1	0	ncRNA_intronic	0.359	7	5	15
rs1487445	11	6	98555272	rs9375188	98565211	0.996038	rs9375188	98565211	C	T	0.0240849	DBP	6:98565211:C:T	0.493	RP11-436D23.1	0	ncRNA_intronic	3.269	5	7	15
rs1872841	11	6	98555272	rs9375188	98576688	0.895285	rs9375188	98576688	C	A	0.024127	DBP	6:98576688:A:C	0.4662	RP11-436D23.1	0	ncRNA_intronic	0.738	6	5	15
rs1906252	11	6	98555272	rs9375188	98550289	0.996038	rs9375188	98550289	C	A	0.0235333	DBP	6:98550289:A:C	0.493	RP11-436D23.1	0	ncRNA_intronic	0.052	NA	9	15
rs2388334	11	6	98555272	rs9375188	98591622	0.988112	rs9375188	98591622	A	G	0.0278102	DBP	6:98591622:A:G	0.4911	RP11-436D23.1	0	ncRNA_intronic	5.756	7	5	15
rs9372734	11	6	98555272	rs9375188	98577689	0.988112	rs9375188	98577689	C	T	0.028982	DBP	6:98577689:C:T	0.4911	RP11-436D23.1	0	ncRNA_intronic	0.114	6	5	15
rs9375188	11	6	98555272	rs9375188	98555272	1	rs9375188	98555272	C	T	0.0226528	DBP	6:98555272:C:T	0.492	RP11-436D23.1	0	ncRNA_intronic	1.721	6	5	15
rs9375195	11	6	98555272	rs9375188	98562720	0.878755	rs9375188	98562720	G	A	0.0358565	DBP	6:98562720:A:G	0.4612	RP11-436D23.1	0	ncRNA_intronic	1.98	6	5	15
rs9375225	11	6	98555272	rs9375188	98588754	0.898629	rs9375188	98588754	G	T	0.0229771	DBP	6:98588754:G:T	0.4672	RP11-436D23.1	0	ncRNA_intronic	0.137	6	5	15
rs9401593	11	6	98555272	rs9375188	98549801	1	rs9375188	98549801	A	C	0.023454	DBP	6:98549801:A:C	0.492	RP11-436D23.1	0	ncRNA_intronic	1.204	7	9	15
rs9401634	11	6	98555272	rs9375188	98578511	0.898629	rs9375188	98578511	T	C	0.0228575	DBP	6:98578511:C:T	0.4672	RP11-436D23.1	0	ncRNA_intronic	7.633	6	5	15
rs968050	11	6	98555272	rs9375188	98574560	0.988112	rs9375188	98574560	C	T	0.0307063	DBP	6:98574560:C:T	0.4911	RP11-436D23.1	0	ncRNA_intronic	6.008	NA	5	15
rs611802	12	6	142866387	rs611802	142866387	1	rs611802	142866387	C	A	0.044749	DBP	6:142866387:A:C	0.3211	RP11-440G9.1	0	ncRNA_intronic	7.648	5	5	15
rs150833979	13	7	18438521	rs150833979	18438521	1	rs150833979	18438521	G	A	0.0499345	DBP	7:18438521:A:G	0.02883	HDAC9	0	intronic	10.78	7	5	15
rs10081437	14	8	8948979	rs10081437	8948979	1	rs7820334	8948979	T	C	0.043131	DBP	8:8948979:C:T	0.497	ERI1	0	intergenic	2.131	6	5	15
rs10086521	14	8	10783769	rs10086521	10783769	1	rs7820334	10783769	T	C	0.0123866	DBP	8:10783769:C:T	0.3489	XKR6	0	intronic	0.521	1f	5	15
rs10090800	14	8	10306432	rs10090800	10306432	1	rs11249905	10306432	C	T	0.0261635	DBP	8:10306432:C:T	0.2326	RP11-981G7.1	10609	intergenic	6.315	6	5	15
rs10093774	14	8	10712945	rs877116	10703293	0.778212	rs7820334	10703293	T	C	0.038821	DBP	8:10703293:C:T	0.3807	RP11-177H2.2	0	ncRNA_intronic	1.286	6	5	14
rs10097870	14	8	11446421	rs11780420	11444516	0.816708	rs7820334	11444516	A	G	0.0393008	DBP	8:11444516:A:G	0.4354	LINC00208	5664	intergenic	0.019	5	5	14
rs10100333	14	8	10712945	rs877116	10584288	0.717184	rs7820334	10584288	C	T	0.0440471	DBP	8:10584288:C:T	0.3887	SOX7:SOX7	00:00:00	intronic	3.603	2b	2	13
rs10107145	14	8	10796472	rs7005884	10758213	0.879023	rs7820334	10758213	A	G	0.0118095	DBP	8:10758213:A:G	0.4692	XKR6	0	intronic	0.556	7	5	15
rs10108511	14	8	11446421	rs11780420	11435516	0.766538	rs7820334	11435516	T	C	0.0497331	DBP	8:11435516:C:T	0.4384	LINC00208	0	ncRNA_intronic	1.67	5	5	14
rs10109537	14	8	11198792	rs7839307	11239640	0.826981	rs7820334	11239640	T	C	0.0318396	DBP	8:11239640:C:T	0.4612	C8orf12	0	intronic	1.125	3a	13	14
rs1039915	14	8	8661534	rs12547493	8679614	0.960175	rs7820334	8679614	C	T	0.0384193	DBP	8:8679614:C:T	0.4414	MFHAS1	0	intronic	0.034	4	2	5
rs1039916	14	8	8661534	rs12547493	8685854	0.964063	rs7820334	8685854	G	A	0.0191975	DBP	8:8685854:A:G	0.4543	MFHAS1	0	intronic	1.488	NA	2	15
rs1045529	14	8	8850633	rs17701675	8890098	0.739736	rs7820334	8890098	T	C	0.048207	DBP	8:8890098:C:T	0.4423	ERI1	0	UTR3	2.842	6	4	5
rs10503410	14	8	10675832	rs2409655	10652352	0.681797	rs7820334	10652352	G	A	0.0451751	DBP	8:10652352:A:G	0.2058	SOX7:SOX7:PINX1	00:00:00	intronic	8.991	NA	4	5
rs1053036	14	8	9071033	rs13260067	9060077	0.879221	rs11249905	9060077	G	A	0.0485195	DBP	8:9060077:A:G	0.4314	RP11-10A14.5	0	ncRNA_exonic	4.841	6	5	15
rs10903330	14	8	10712945	rs877116	10673104	0.769552	rs7820334	10673104	A	G	0.0445678	DBP	8:10673104:A:G	0.3877	SOX7:SOX7:PINX1	00:00:00	intronic	4.132	6	4	5
rs10903333	14	8	10751709	rs1529598	10771237	0.88284	rs7820334	10771237	G	A	0.0465436	DBP	8:10771237:A:G	0.2922	XKR6	0	intronic	4.488	5	5	15
rs1106740	14	8	10675832	rs2409655	10652138	0.681797	rs7820334	10652138	C	T	0.0453284	DBP	8:10652138:C:T	0.2058	SOX7:SOX7:PINX1	00:00:00	intronic	0.316	NA	5	5
rs11249891	14	8	8661534	rs12547493	8649881	0.968408	rs7820334	8649881	T	C	0.0132282	DBP	8:8649881:C:T	0.4414	MFHAS1	0	intronic	3.127	7	4	5
rs11249905	14	8	9042454	rs11249905	9042454	1	rs11249905	9042454	G	A	0.00412674	DBP	8:9042454:A:G	0.328	RP11-10A14.6	2424	intergenic	7.543	5	5	15
rs11249906	14	8	9042454	rs11249905	9042607	0.671629	rs11249905	9042607	G	T	0.0137815	DBP	8:9042607:G:T	0.2744	RP11-10A14.6	2577	intergenic	9.087	7	5	15
rs11250086	14	8	10796472	rs7005884	10769783	0.748892	rs7820334	10769783	G	A	0.00663657	DBP	8:10769783:A:G	0.4871	XKR6	0	intronic	7.399	7	5	15
rs11250092	14	8	10796472	rs7005884	10786543	0.897923	rs7820334	10786543	G	A	0.00591487	DBP	8:10786543:A:G	0.4722	XKR6	0	intronic	1.287	1f	1	15
rs11250093	14	8	10796472	rs7005884	10798828	0.98134	rs7820334	10798828	T	C	0.00384235	DBP	8:10798828:C:T	0.4563	XKR6	0	intronic	1.168	1f	5	15
rs11250140	14	8	11347289	rs2736342	11346592	0.942016	rs7820334	11346592	A	C	0.0075381	DBP	8:11346592:A:C	0.4592	BLK	4917	intergenic	0.688	6	5	15
rs11775149	14	8	11347289	rs2736342	11335242	0.93446	rs7820334	11335242	G	A	0.0127985	DBP	8:11335242:A:G	0.4592	FAM167A	3017	intergenic	0.437	7	5	15
rs11775150	14	8	11347289	rs2736342	11335248	0.93446	rs7820334	11335248	G	A	0.0127985	DBP	8:11335248:A:G	0.4592	FAM167A	3023	intergenic	1.474	7	5	15
rs11775523	14	8	8661534	rs12547493	8679176	0.964302	rs7820334	8679176	G	A	0.0379941	DBP	8:8679176:A:G	0.4404	MFHAS1	0	intronic	10.14	6	2	5
rs11776011	14	8	10751709	rs1529598	10770796	0.895737	rs7820334	10770796	T	C	0.0430221	DBP	8:10770796:C:T	0.2913	XKR6	0	intronic	1.553	5	5	15
rs11776020	14	8	8808388	rs35305751	8809696	0.991118	rs11249905	8809696	A	G	0.0230723	DBP	8:8809696:A:G	0.329	RP11-62H7.2	9013	intergenic	0.116	4	5	15
rs11776368	14	8	10751709	rs1529598	10783691	0.835486	rs7820334	10783691	A	G	0.0490305	DBP	8:10783691:A:G	0.2793	XKR6	0	intronic	2.018	5	5	15
rs11776845	14	8	8605632	rs4841029	8604184	0.925899	rs11249905	8604184	C	T	0.0468754	DBP	8:8604184:C:T	0.4274	RP11-211C9.1	0	ncRNA_intronic	6.52	6	5	15
rs11776965	14	8	10612925	rs4840514	10697880	0.850882	rs7820334	10697880	G	A	0.00146996	DBP	8:10697880:A:G	0.2803	RP11-177H2.2	205	upstream	4.173	2b	1	1
rs11777007	14	8	10796472	rs7005884	10801857	0.948679	rs7820334	10801857	C	T	0.00297699	DBP	8:10801857:C:T	0.4672	XKR6	0	intronic	4.643	5	5	15
rs11777976	14	8	10280228	rs7831557	10255402	0.781221	rs7820334	10255402	A	G	0.0495413	DBP	8:10255402:A:G	0.4761	MSRA	0	intronic	0.126	7	5	15
rs11780420	14	8	11446421	rs11780420	11446421	1	rs7820334	11446421	G	A	0.0437147	DBP	8:11446421:A:G	0.4036	LINC00208	7569	intergenic	2.107	5	5	14
rs11780851	14	8	11347289	rs2736342	11401116	0.690379	rs7820334	11401116	G	A	0.0285074	DBP	8:11401116:A:G	0.4801	BLK	0	intronic	9.069	5	5	15
rs11781400	14	8	11374072	rs11781400	11374072	1	rs7820334	11374072	G	T	0.0368124	DBP	8:11374072:G:T	0.3807	BLK	0	intronic	0.31	7	2	14
rs11782430	14	8	11198792	rs7839307	11226071	0.823876	rs7820334	11226071	G	A	0.0430947	DBP	8:11226071:A:G	0.4692	C8orf12	0	intronic	2.691	5	5	14
rs11783247	14	8	10796472	rs7005884	10788875	0.939104	rs7820334	10788875	C	T	0.00437255	DBP	8:10788875:C:T	0.4702	XKR6	0	intronic	2.201	7	9	15
rs11783418	14	8	10796472	rs7005884	10841858	0.740285	rs7820334	10841858	G	A	0.0349276	DBP	8:10841858:A:G	0.495	XKR6	0	intronic	3.723	7	14	14
rs11783749	14	8	10796472	rs7005884	10802055	0.948679	rs7820334	10802055	G	A	0.00339935	DBP	8:10802055:A:G	0.4672	XKR6	0	intronic	4.146	5	5	15
rs11784052	14	8	8661534	rs12547493	8671962	0.903949	rs7820334	8671962	T	C	0.0217639	DBP	8:8671962:C:T	0.4284	MFHAS1	0	intronic	2.474	1f	4	5
rs11784144	14	8	10520548	rs4841410	10518691	0.980343	rs7820334	10518691	A	G	0.00462134	DBP	8:10518691:A:G	0.4304	RP1L1	0	intergenic	0.685	5	5	14
rs11784393	14	8	8907950	rs2044387	8903134	0.807229	rs7820334	8903134	T	C	0.0317557	DBP	8:8903134:C:T	0.4583	ERI1	0	intergenic	0.45	7	5	15
rs11996321	14	8	10556785	rs79466810	10556109	0.947732	rs7820334	10556109	C	T	0.028793	DBP	8:10556109:C:T	0.2366	RP1L1:C8orf74	00:00:00	intronic	0.487	4	2	15
rs12155745	14	8	11347289	rs2736342	11362277	0.743692	rs7820334	11362277	G	T	0.0169772	DBP	8:11362277:G:T	0.4672	BLK	0	intronic	1.093	5	5	15
rs12155811	14	8	10675832	rs2409655	10673513	0.687695	rs7820334	10673513	T	C	0.0488439	DBP	8:10673513:C:T	0.2048	SOX7:SOX7:PINX1	00:00:00	intronic	0.532	4	2	5
rs12156009	14	8	11285219	rs12156009	11285219	1	rs7820334	11285219	A	C	0.04074	DBP	8:11285219:A:C	0.4851	C8orf12:FAM167A	00:00:00	intronic	3.201	5	2	15
rs12375394	14	8	10675832	rs2409655	10689212	0.677967	rs7820334	10689212	T	C	0.0450306	DBP	8:10689212:C:T	0.2048	SOX7:SOX7:PINX1	00:00:00	exonic	11.21	7	4	4
rs12542037	14	8	10796472	rs7005884	10758496	0.841981	rs7820334	10758496	A	G	0.00578944	DBP	8:10758496:A:G	0.4553	XKR6	0	intronic	0.127	7	5	15
rs12542733	14	8	8850633	rs17701675	8824858	0.70898	rs7820334	8824858	G	T	0.0169485	DBP	8:8824858:G:T	0.4602	RP11-62H7.2	0	ncRNA_intronic	2.74	7	5	15
rs12545499	14	8	8661534	rs12547493	8682878	0.983889	rs7820334	8682878	C	T	0.0167746	DBP	8:8682878:C:T	0.4493	MFHAS1	0	intronic	3.001	7	4	5
rs12546366	14	8	10796472	rs7005884	10802146	0.952251	rs7820334	10802146	T	C	0.00250649	DBP	8:10802146:C:T	0.4662	XKR6	0	intronic	6.392	5	5	15
rs12546498	14	8	8921570	rs12546498	8921570	1	rs12546498	8921570	A	G	0.0178798	DBP	8:8921570:A:G	0.3926	ERI1	0	intergenic	2.808	2c	5	15
rs12546760	14	8	8363897	rs2921036	8374836	0.699401	rs7820334	8374836	A	G	0.0403995	DBP	8:8374836:A:G	0.492	CTD-3023L14.3	38411	intergenic	0.112	1f	5	15
rs12547100	14	8	11198792	rs7839307	11242632	0.850976	rs7820334	11242632	A	G	0.0399465	DBP	8:11242632:A:G	0.4662	C8orf12	0	intronic	1.013	7	13	14
rs12547493	14	8	8661534	rs12547493	8661534	1	rs7820334	8661534	C	T	0.00847609	DBP	8:8661534:C:T	0.4473	MFHAS1	0	intronic	5.035	1f	4	5
rs12547955	14	8	9035829	rs12547955	9035829	1	rs7820334	9035829	T	G	0.0340988	DBP	8:9035829:G:T	0.498	RP11-10A14.6	1931	intergenic	0.359	3a	5	15
rs12548747	14	8	8921570	rs12546498	8921568	1	rs12546498	8921568	G	A	0.0179682	DBP	8:8921568:A:G	0.3926	ERI1	0	intergenic	1.7	2c	5	15
rs12676417	14	8	10712945	rs877116	10668634	0.814202	rs7820334	10668634	A	G	0.0465893	DBP	8:10668634:A:G	0.3966	SOX7:SOX7:PINX1	00:00:00	intronic	2.417	1f	4	5
rs12679529	14	8	10796472	rs7005884	10803465	0.785397	rs7820334	10803465	T	C	0.00360247	DBP	8:10803465:C:T	0.4414	XKR6	0	intronic	3.788	5	5	15
rs12682352	14	8	8661534	rs12547493	8646246	0.980071	rs7820334	8646246	C	T	0.0131501	DBP	8:8646246:C:T	0.4483	MFHAS1	0	intronic	0.006	1d	4	5
rs12750	14	8	10675832	rs2409655	10622812	0.672309	rs7820334	10622812	A	G	0.0316193	DBP	8:10622812:A:G	0.2078	SOX7:SOX7:CTD-2135J3.3:PINX1	0:0:0:0	ncRNA_intronic	0.601	NA	4	4
rs13256208	14	8	10805015	rs7821914	10811878	0.767647	rs7820334	10811878	T	C	0.0281696	DBP	8:10811878:C:T	0.3877	XKR6	0	intronic	0.009	6	5	15
rs13256554	14	8	11446421	rs11780420	11432946	0.772887	rs7820334	11432946	C	A	0.0448415	DBP	8:11432946:A:C	0.4483	LINC00208	875	upstream	2.867	7	5	14
rs13259216	14	8	8661534	rs12547493	8673601	0.96813	rs7820334	8673601	C	A	0.024765	DBP	8:8673601:A:C	0.4433	MFHAS1	0	intronic	3.727	5	4	5
rs13260067	14	8	9071033	rs13260067	9071033	1	rs11249905	9071033	G	A	0.0268556	DBP	8:9071033:A:G	0.4056	RP11-10A14.5	10668	intergenic	0.035	6	5	15
rs13270267	14	8	11446421	rs11780420	11444837	0.817417	rs7820334	11444837	T	C	0.0354717	DBP	8:11444837:C:T	0.4354	LINC00208	5985	intergenic	0.37	5	5	14
rs13270870	14	8	10796472	rs7005884	10770782	0.751025	rs7820334	10770782	G	A	0.00685432	DBP	8:10770782:A:G	0.4881	XKR6	0	intronic	0.165	5	5	15
rs13272061	14	8	11347289	rs2736342	11352261	0.942016	rs7820334	11352261	G	T	0.0128925	DBP	8:11352261:G:T	0.4592	BLK	0	intronic	3.657	2b	1	15
rs13272451	14	8	8850633	rs17701675	8886183	0.768608	rs7820334	8886183	T	G	0.0343749	DBP	8:8886183:G:T	0.4374	ERI1	0	intronic	1.869	6	4	5
rs1382567	14	8	11347289	rs2736342	11350899	0.93418	rs7820334	11350899	T	C	0.0119002	DBP	8:11350899:C:T	0.4573	BLK	610	upstream	6.357	4	2	15
rs1435274	14	8	11198792	rs7839307	11235910	0.81995	rs7820334	11235910	A	G	0.042178	DBP	8:11235910:A:G	0.4592	C8orf12	0	intronic	0.645	NA	5	14
rs1435277	14	8	11198792	rs7839307	11196970	0.950704	rs7820334	11196970	C	T	0.0403035	DBP	8:11196970:C:T	0.4771	TDH	175	upstream	2.749	7	5	15
rs1478898	14	8	11347289	rs2736342	11395079	0.692373	rs7820334	11395079	G	A	0.029955	DBP	8:11395079:A:G	0.4831	BLK	0	intronic	0.367	NA	2	15
rs1529598	14	8	10751709	rs1529598	10751709	1	rs7820334	10751709	T	C	0.0175378	DBP	8:10751709:C:T	0.2982	XKR6	1845	intergenic	1.534	7	5	15
rs1531576	14	8	11347289	rs2736342	11338146	0.794802	rs7820334	11338146	A	G	0.0119274	DBP	8:11338146:A:G	0.4175	FAM167A	5921	intergenic	2.425	4	2	15
rs1533058	14	8	8661534	rs12547493	8685190	0.93592	rs7820334	8685190	G	A	0.0455331	DBP	8:8685190:A:G	0.4453	MFHAS1	0	intronic	5.143	NA	5	5
rs1533059	14	8	8661534	rs12547493	8684953	0.931899	rs7820334	8684953	A	G	0.0426612	DBP	8:8684953:A:G	0.4443	MFHAS1	0	intronic	1.584	NA	5	5
rs1562211	14	8	8907950	rs2044387	8902424	0.807229	rs7820334	8902424	A	G	0.0350221	DBP	8:8902424:A:G	0.4583	ERI1	0	intergenic	4.881	1f	5	15
rs1600250	14	8	11347289	rs2736342	11345425	0.942016	rs7820334	11345425	A	C	0.00738814	DBP	8:11345425:A:C	0.4592	BLK	6084	intergenic	5.075	7	5	15
rs1600252	14	8	11347289	rs2736342	11345644	0.942016	rs7820334	11345644	A	G	0.00738814	DBP	8:11345644:A:G	0.4592	BLK	5865	intergenic	2.304	7	5	15
rs17153498	14	8	11446421	rs11780420	11446955	0.992293	rs7820334	11446955	G	A	0.0478387	DBP	8:11446955:A:G	0.4016	LINC00208	8103	intergenic	1.776	4	2	14
rs17701675	14	8	8850633	rs17701675	8850633	1	rs7820334	8850633	A	G	0.0072667	DBP	8:8850633:A:G	0.3897	ERI1	9023	intergenic	0.888	1f	5	15
rs17709397	14	8	10280228	rs7831557	10249861	0.784999	rs7820334	10249861	G	A	0.0392902	DBP	8:10249861:A:G	0.4732	MSRA	0	intronic	4.806	4	5	15
rs17712981	14	8	10675832	rs2409655	10642658	0.662887	rs7820334	10642658	C	T	0.0456278	DBP	8:10642658:C:T	0.2008	SOX7:SOX7:PINX1	00:00:00	intronic	6.162	6	5	5
rs17721089	14	8	10556785	rs79466810	10705438	0.661366	rs7820334	10705438	T	C	0.0259634	DBP	8:10705438:C:T	0.2048	RP11-177H2.2	1426	intergenic	8.098	6	5	14
rs17744726	14	8	11374072	rs11781400	11411823	0.743744	rs7820334	11411823	A	G	0.0455047	DBP	8:11411823:A:G	0.3569	BLK	0	intronic	2.317	5	5	14
rs17765901	14	8	10280228	rs7831557	10249480	0.784033	rs7820334	10249480	G	T	0.0349666	DBP	8:10249480:G:T	0.4732	MSRA	0	intronic	1.064	5	5	15
rs17774023	14	8	10612925	rs4840514	10626333	0.985121	rs7820334	10626333	C	T	0.00516228	DBP	8:10626333:C:T	0.2843	SOX7:SOX7:CTD-2135J3.3:PINX1	0:0:0:0	ncRNA_intronic	2.002	7	4	5
rs17776404	14	8	10675832	rs2409655	10672829	0.687695	rs7820334	10672829	G	A	0.0471675	DBP	8:10672829:A:G	0.2048	SOX7:SOX7:PINX1	00:00:00	intronic	0.468	6	4	5
rs17776622	14	8	10675832	rs2409655	10676497	0.70736	rs7820334	10676497	C	T	0.0462587	DBP	8:10676497:C:T	0.2048	SOX7:SOX7:PINX1	00:00:00	intronic	2.116	4	3	4
rs17776946	14	8	10675832	rs2409655	10682674	0.676971	rs7820334	10682674	C	A	0.0461754	DBP	8:10682674:A:C	0.2068	SOX7:SOX7:PINX1	00:00:00	intronic	3.956	5	4	4
rs17778581	14	8	10796472	rs7005884	10743421	0.743541	rs7820334	10743421	T	C	0.00455752	DBP	8:10743421:C:T	0.4841	XKR6	10133	intergenic	1.014	5	5	14
rs17799486	14	8	11347289	rs2736342	11340494	0.937996	rs7820334	11340494	A	G	0.00800826	DBP	8:11340494:A:G	0.4583	FAM167A	8269	intergenic	0.51	7	5	15
rs1900102	14	8	8921570	rs12546498	8923585	0.957233	rs12546498	8923585	C	T	0.0255623	DBP	8:8923585:C:T	0.3956	ERI1	0	intergenic	2.04	2a	1	15
rs1964356	14	8	8850633	rs17701675	8853270	0.983678	rs7820334	8853270	T	G	0.0108941	DBP	8:8853270:G:T	0.3877	ERI1	6386	intergenic	0.647	NA	5	15
rs1986868	14	8	10675832	rs2409655	10598344	0.854709	rs7820334	10598344	G	A	0.0490495	DBP	8:10598344:A:G	0.2545	SOX7:SOX7:CTD-2135J3.3	00:00:00	ncRNA_intronic	8.522	6	5	14
rs2005310	14	8	10675832	rs2409655	10652033	0.681797	rs7820334	10652033	A	G	0.0446414	DBP	8:10652033:A:G	0.2058	SOX7:SOX7:PINX1	00:00:00	intronic	1.908	NA	5	5
rs2043132	14	8	8808388	rs35305751	8805424	0.904764	rs11249905	8805424	A	G	0.0408887	DBP	8:8805424:A:G	0.3151	RP11-62H7.2	13285	intergenic	0.024	NA	5	15
rs2044387	14	8	8907950	rs2044387	8907950	1	rs7820334	8907950	A	G	0.0323616	DBP	8:8907950:A:G	0.4125	ERI1	0	intergenic	0.063	6	5	15
rs2048419	14	8	8661534	rs12547493	8658540	0.926332	rs7820334	8658540	G	A	0.0148743	DBP	8:8658540:A:G	0.4324	MFHAS1	0	intronic	4.468	7	5	5
rs2088346	14	8	11654384	rs2088346	11654384	1	rs2088346	11654384	G	T	0.0216797	DBP	8:11654384:G:T	0.2266	FDFT1	0	intronic	0.38	4	1	5
rs2199690	14	8	11347289	rs2736342	11339616	0.93418	rs7820334	11339616	T	G	0.0088127	DBP	8:11339616:G:T	0.4573	FAM167A	7391	intergenic	4.371	4	5	15
rs2245232	14	8	11347289	rs2736342	11400944	0.692456	rs7820334	11400944	G	T	0.032754	DBP	8:11400944:G:T	0.4791	BLK	0	intronic	8.189	NA	5	15
rs2245250	14	8	11347289	rs2736342	11400680	0.692456	rs7820334	11400680	G	A	0.0283798	DBP	8:11400680:A:G	0.4791	BLK	0	intronic	2.637	NA	5	15
rs2248316	14	8	11347289	rs2736342	11397073	0.69867	rs7820334	11397073	A	C	0.0309251	DBP	8:11397073:A:C	0.4811	BLK	0	intronic	6.644	NA	2	15
rs2248325	14	8	11347289	rs2736342	11396874	0.69867	rs7820334	11396874	A	G	0.0333083	DBP	8:11396874:A:G	0.4811	BLK	0	intronic	0.553	4	2	15
rs2248909	14	8	11347289	rs2736342	11392093	0.705418	rs7820334	11392093	A	C	0.0160042	DBP	8:11392093:A:C	0.4652	BLK	0	intronic	3.651	NA	2	14
rs2271342	14	8	8661534	rs12547493	8643938	0.964055	rs7820334	8643938	T	C	0.0174738	DBP	8:8643938:C:T	0.4483	MFHAS1	0	intronic	1.258	5	4	5
rs2409654	14	8	10675832	rs2409655	10676935	1	rs7820334	10676935	T	C	0.0414648	DBP	8:10676935:C:T	0.2624	SOX7:SOX7:PINX1	00:00:00	intronic	0.46	NA	3	5
rs2409655	14	8	10675832	rs2409655	10675832	1	rs7820334	10675832	G	A	0.0407946	DBP	8:10675832:A:G	0.2624	SOX7:SOX7:PINX1	00:00:00	intronic	2.638	NA	4	4
rs2409658	14	8	10712945	rs877116	10668965	0.814202	rs7820334	10668965	A	G	0.0451991	DBP	8:10668965:A:G	0.3966	SOX7:SOX7:PINX1	00:00:00	intronic	0.188	NA	4	5
rs2409676	14	8	10712945	rs877116	10722058	0.708936	rs7820334	10722058	T	C	0.0380052	DBP	8:10722058:C:T	0.4394	RP11-177H2.2	18046	intergenic	1.971	NA	5	14
rs2409756	14	8	11198792	rs7839307	11242025	0.834905	rs7820334	11242025	G	T	0.0454952	DBP	8:11242025:G:T	0.4553	C8orf12	0	intronic	2.468	6	13	14
rs2409784	14	8	11347289	rs2736342	11396856	0.757406	rs7820334	11396856	C	A	0.0120916	DBP	8:11396856:A:C	0.4612	BLK	0	intronic	1.911	1d	2	15
rs2409798	14	8	11446421	rs11780420	11435564	0.775153	rs7820334	11435564	C	T	0.0410217	DBP	8:11435564:C:T	0.4473	LINC00208	0	ncRNA_intronic	2.009	5	5	14
rs2428	14	8	8661534	rs12547493	8641145	0.929611	rs7820334	8641145	T	C	0.0252215	DBP	8:8641145:C:T	0.4553	MFHAS1	0	UTR3	16.03	1f	2	5
rs2467520	14	8	11347289	rs2736342	11398953	0.663496	rs7820334	11398953	T	C	0.0271462	DBP	8:11398953:C:T	0.4851	BLK	0	intronic	3.613	NA	5	15
rs2572369	14	8	11198792	rs7839307	11238597	0.830869	rs7820334	11238597	T	C	0.0380164	DBP	8:11238597:C:T	0.4602	C8orf12	0	intronic	2.289	NA	9	14
rs2572376	14	8	11198792	rs7839307	11237756	0.826981	rs7820334	11237756	A	C	0.0359809	DBP	8:11237756:A:C	0.4612	C8orf12	0	intronic	1.401	NA	9	14
rs2572382	14	8	11198792	rs7839307	11211302	0.900636	rs7820334	11211302	T	G	0.0401256	DBP	8:11211302:G:T	0.4742	TDH	0	ncRNA_intronic	2.824	NA	5	14
rs2572385	14	8	11198792	rs7839307	11208903	0.916483	rs7820334	11208903	G	A	0.0379662	DBP	8:11208903:A:G	0.4781	TDH	0	ncRNA_intronic	0.953	NA	2	14
rs2572440	14	8	11198792	rs7839307	11249010	0.732257	rs7820334	11249010	G	T	0.0336777	DBP	8:11249010:G:T	0.4722	C8orf12	0	intronic	1.583	NA	5	14
rs2572446	14	8	11198792	rs7839307	11239565	0.826981	rs7820334	11239565	T	C	0.0328095	DBP	8:11239565:C:T	0.4612	C8orf12	0	intronic	2.887	NA	13	14
rs2572447	14	8	11198792	rs7839307	11239510	0.826981	rs7820334	11239510	A	G	0.0331514	DBP	8:11239510:A:G	0.4612	C8orf12	0	intronic	0.798	NA	13	14
rs2572448	14	8	11198792	rs7839307	11239352	0.830869	rs7820334	11239352	A	G	0.0354717	DBP	8:11239352:A:G	0.4602	C8orf12	0	intronic	4.714	NA	13	14
rs2572449	14	8	11198792	rs7839307	11239137	0.830869	rs7820334	11239137	A	G	0.0328095	DBP	8:11239137:A:G	0.4602	C8orf12	0	intronic	1.824	NA	13	14
rs2618434	14	8	11347289	rs2736342	11398865	0.692456	rs7820334	11398865	A	G	0.0382545	DBP	8:11398865:A:G	0.4791	BLK	0	intronic	0.855	6	5	15
rs2736273	14	8	11198792	rs7839307	11199938	0.940026	rs7820334	11199938	C	A	0.0440821	DBP	8:11199938:A:C	0.4801	TDH	0	ncRNA_intronic	1.801	5	5	14
rs2736285	14	8	11198792	rs7839307	11226456	0.826007	rs7820334	11226456	A	C	0.0398538	DBP	8:11226456:A:C	0.4602	C8orf12	0	intronic	0.53	6	5	14
rs2736305	14	8	11198792	rs7839307	11237773	0.823106	rs7820334	11237773	C	T	0.0315083	DBP	8:11237773:C:T	0.4622	C8orf12	0	intronic	1.65	5	9	14
rs2736342	14	8	11347289	rs2736342	11347289	1	rs7820334	11347289	T	G	0.00658807	DBP	8:11347289:G:T	0.4433	BLK	4220	intergenic	5.076	1f	5	9
rs28507213	14	8	10280228	rs7831557	10250849	0.782458	rs7820334	10250849	C	T	0.042006	DBP	8:10250849:C:T	0.4742	MSRA	0	intronic	0.626	7	5	15
rs2898249	14	8	10745586	rs2898249	10745586	1	rs7820334	10745586	T	C	0.0317686	DBP	8:10745586:C:T	0.2942	XKR6	7968	intergenic	0.071	NA	5	14
rs2898290	14	8	11446421	rs11780420	11433909	0.769268	rs7820334	11433909	T	C	0.0432549	DBP	8:11433909:C:T	0.4473	LINC00208	0	ncRNA_exonic	3.539	5	5	14
rs2921036	14	8	8363897	rs2921036	8363897	1	rs7820334	8363897	T	C	0.0126295	DBP	8:8363897:C:T	0.495	CTA-398F10.2	45049	intergenic	3.789	NA	5	15
rs2921040	14	8	8328101	rs2921040	8328101	1	rs11249905	8328101	C	T	0.0373562	DBP	8:8328101:C:T	0.2177	CTA-398F10.2	9253	intergenic	1.808	NA	1	15
rs2921071	14	8	8363897	rs2921036	8308044	0.663326	rs7820334	8308044	C	A	0.0491542	DBP	8:8308044:A:C	0.4602	CTA-398F10.2	6374	intergenic	6.502	NA	5	15
rs2921383	14	8	8850633	rs17701675	8892221	0.771649	rs7820334	8892221	T	C	0.026433	DBP	8:8892221:C:T	0.4334	ERI1	0	intergenic	0.375	NA	5	5
rs2929305	14	8	9084341	rs2929453	9085217	1	rs7820334	9085217	G	A	0.0102066	DBP	8:9085217:A:G	0.4761	RP11-10A14.8	5305	intergenic	6.447	NA	5	15
rs2929309	14	8	9084341	rs2929453	9083771	0.931383	rs7820334	9083771	C	A	0.00864245	DBP	8:9083771:A:C	0.494	RP11-10A14.8	6751	intergenic	0.402	NA	5	15
rs2929452	14	8	9084341	rs2929453	9084465	1	rs7820334	9084465	G	A	0.00957501	DBP	8:9084465:A:G	0.4761	RP11-10A14.8	6057	intergenic	7.418	NA	2	15
rs2929453	14	8	9084341	rs2929453	9084341	1	rs7820334	9084341	T	C	0.00843807	DBP	8:9084341:C:T	0.4761	RP11-10A14.8	6181	intergenic	6.277	NA	5	15
rs2929454	14	8	9084341	rs2929453	9083854	0.991989	rs7820334	9083854	A	C	0.0108487	DBP	8:9083854:A:C	0.4742	RP11-10A14.8	6668	intergenic	6.388	NA	5	15
rs2929456	14	8	9084341	rs2929453	9083416	0.991989	rs7820334	9083416	G	A	0.0108499	DBP	8:9083416:A:G	0.4742	RP11-10A14.8	7106	intergenic	5.483	NA	5	15
rs2929457	14	8	9082249	rs2929457	9082249	1	rs11249905	9082249	A	C	0.0465665	DBP	8:9082249:A:C	0.3181	RP11-10A14.8	8273	intergenic	5.069	NA	5	15
rs2953802	14	8	8850633	rs17701675	8851881	0.995919	rs7820334	8851881	A	G	0.00933431	DBP	8:8851881:A:G	0.3887	ERI1	7775	intergenic	0.916	NA	2	15
rs2953805	14	8	8907950	rs2044387	8914757	0.719991	rs7820334	8914757	C	T	0.048323	DBP	8:8914757:C:T	0.4563	ERI1	0	intergenic	7.126	NA	5	15
rs2953806	14	8	8907950	rs2044387	8914124	0.723353	rs7820334	8914124	T	C	0.0460872	DBP	8:8914124:C:T	0.4553	ERI1	0	intergenic	0.732	NA	5	15
rs2956244	14	8	8850633	rs17701675	8885166	0.744297	rs7820334	8885166	G	A	0.0385993	DBP	8:8885166:A:G	0.4463	ERI1	0	intronic	4.573	7	4	5
rs2979252	14	8	8921570	rs12546498	8922043	0.984446	rs12546498	8922043	G	A	0.0231686	DBP	8:8922043:A:G	0.3887	ERI1	0	intergenic	2.04	NA	5	15
rs2979253	14	8	8907950	rs2044387	8919676	0.705529	rs7820334	8919676	T	C	0.0417621	DBP	8:8919676:C:T	0.4493	ERI1	0	intergenic	3.384	NA	1	15
rs2980768	14	8	8328101	rs2921040	8319249	0.966843	rs11249905	8319249	A	G	0.0474565	DBP	8:8319249:A:G	0.2237	CTA-398F10.2	401	upstream	0.001	4	2	15
rs3021416	14	8	8907950	rs2044387	8919136	0.707739	rs7820334	8919136	A	G	0.045295	DBP	8:8919136:A:G	0.4483	ERI1	0	intergenic	2.868	NA	1	15
rs330048	14	8	9084341	rs2929453	9087278	0.991943	rs7820334	9087278	A	C	0.0127263	DBP	8:9087278:A:C	0.4742	RP11-10A14.8	3244	intergenic	0.794	1f	5	15
rs330049	14	8	9084341	rs2929453	9087299	0.972079	rs7820334	9087299	A	G	0.00900461	DBP	8:9087299:A:G	0.4692	RP11-10A14.8	3223	intergenic	0.774	1f	5	15
rs330054	14	8	9084341	rs2929453	9088291	0.991943	rs7820334	9088291	G	A	0.0138055	DBP	8:9088291:A:G	0.4742	RP11-10A14.8	2231	intergenic	10.59	5	1	15
rs330057	14	8	9084341	rs2929453	9089793	0.991943	rs7820334	9089793	C	T	0.0155819	DBP	8:9089793:C:T	0.4742	RP11-10A14.8	729	upstream	0.804	7	5	15
rs330058	14	8	9084341	rs2929453	9089809	0.972079	rs7820334	9089809	G	A	0.010961	DBP	8:9089809:A:G	0.4692	RP11-10A14.8	713	upstream	0.138	6	5	15
rs330060	14	8	9084341	rs2929453	9090902	0.944405	rs7820334	9090902	A	G	0.0125083	DBP	8:9090902:A:G	0.4662	RP11-10A14.8	0	ncRNA_exonic	4.971	7	5	15
rs332037	14	8	8661534	rs12547493	8722675	0.740805	rs7820334	8722675	T	C	0.0434039	DBP	8:8722675:C:T	0.3946	MFHAS1	0	intronic	0.77	NA	4	5
rs34389718	14	8	9071033	rs13260067	9065525	0.975136	rs11249905	9065525	G	A	0.0304796	DBP	8:9065525:A:G	0.4016	RP11-10A14.5	5160	intergenic	1.78	6	5	15
rs34455383	14	8	9071033	rs13260067	9066458	0.896907	rs11249905	9066458	T	C	0.0365713	DBP	8:9066458:C:T	0.3837	RP11-10A14.5	6093	intergenic	0.208	5	5	15
rs34491841	14	8	9071033	rs13260067	9065510	0.975007	rs11249905	9065510	A	C	0.0313572	DBP	8:9065510:A:C	0.4016	RP11-10A14.5	5145	intergenic	0.149	6	5	15
rs34944514	14	8	11252425	rs34944514	11252425	1	rs7820334	11252425	A	C	0.0212668	DBP	8:11252425:A:C	0.4423	C8orf12	0	intronic	0.718	7	5	14
rs34959618	14	8	10805015	rs7821914	10825164	0.68403	rs7820334	10825164	C	T	0.0310383	DBP	8:10825164:C:T	0.3539	XKR6	0	intronic	0.125	5	5	15
rs35091929	14	8	10712945	rs877116	10693492	0.80174	rs7820334	10693492	T	C	0.0416475	DBP	8:10693492:C:T	0.3907	SOX7:SOX7:PINX1	00:00:00	intronic	1.964	7	4	5
rs35181953	14	8	11446421	rs11780420	11435049	0.775153	rs7820334	11435049	G	A	0.0405904	DBP	8:11435049:A:G	0.4473	LINC00208	0	ncRNA_intronic	0.072	5	5	14
rs35305751	14	8	8808388	rs35305751	8808388	1	rs11249905	8808388	A	C	0.0182036	DBP	8:8808388:A:C	0.329	RP11-62H7.2	10321	intergenic	0.476	6	4	15
rs35431455	14	8	8661534	rs12547493	8673736	0.956371	rs7820334	8673736	C	T	0.0201471	DBP	8:8673736:C:T	0.4404	MFHAS1	0	intronic	2.268	6	4	5
rs35558344	14	8	11446421	rs11780420	11434232	0.769268	rs7820334	11434232	C	T	0.0449483	DBP	8:11434232:C:T	0.4473	LINC00208	0	ncRNA_exonic	0.306	5	5	14
rs35694744	14	8	8843878	rs35694744	8843878	1	rs11249905	8843878	C	T	0.0198612	DBP	8:8843878:C:T	0.2565	RP11-62H7.2	7342	intergenic	0.282	7	14	15
rs3750310	14	8	10280228	rs7831557	10283426	0.957575	rs7820334	10283426	G	A	0.0233514	DBP	8:10283426:A:G	0.4612	MSRA	0	intronic	3.357	5	2	15
rs3750311	14	8	10280228	rs7831557	10283602	0.957575	rs7820334	10283602	C	A	0.0229755	DBP	8:10283602:A:C	0.4612	MSRA	0	intronic	3.958	5	2	15
rs393155	14	8	9035829	rs12547955	9033093	0.71467	rs7820334	9033093	A	G	0.0371667	DBP	8:9033093:A:G	0.4742	RP11-10A14.6	4667	intergenic	1.7	NA	4	15
rs4240671	14	8	10796472	rs7005884	10767748	0.76575	rs7820334	10767748	A	G	0.00565302	DBP	8:10767748:A:G	0.4911	XKR6	0	intronic	0.285	1f	2	15
rs4240672	14	8	10796472	rs7005884	10767917	0.748892	rs7820334	10767917	A	G	0.00694247	DBP	8:10767917:A:G	0.4871	XKR6	0	intronic	6.527	5	5	15
rs4240673	14	8	10796472	rs7005884	10787612	0.949279	rs7820334	10787612	T	C	0.00410417	DBP	8:10787612:C:T	0.4672	XKR6	0	intronic	1.195	7	13	15
rs4310166	14	8	10734662	rs6984171	10763736	0.929617	rs7820334	10763736	G	A	0.0484171	DBP	8:10763736:A:G	0.3718	XKR6	0	intronic	3.237	6	5	15
rs435581	14	8	9035829	rs12547955	9029413	0.667693	rs7820334	9029413	G	A	0.0385504	DBP	8:9029413:A:G	0.4821	RP11-10A14.4	3766	intergenic	3.439	NA	2	15
rs4368940	14	8	10520548	rs4841410	10526742	0.941938	rs7820334	10526742	T	C	0.0158957	DBP	8:10526742:C:T	0.4205	RP1L1	0	intergenic	0.355	7	5	15
rs4496928	14	8	10751709	rs1529598	10769060	0.862305	rs7820334	10769060	G	T	0.0425028	DBP	8:10769060:G:T	0.2992	XKR6	0	intronic	4.247	6	5	15
rs453301	14	8	9035829	rs12547955	9030387	0.663356	rs7820334	9030387	G	T	0.0294087	DBP	8:9030387:G:T	0.4712	RP11-10A14.4	4740	intergenic	5.894	NA	2	15
rs4537305	14	8	8907950	rs2044387	8902670	0.807229	rs7820334	8902670	G	A	0.0290158	DBP	8:8902670:A:G	0.4583	ERI1	0	intergenic	7.01	4	5	15
rs4549730	14	8	11198792	rs7839307	11239078	0.830869	rs7820334	11239078	G	T	0.0328218	DBP	8:11239078:G:T	0.4602	C8orf12	0	intronic	0.718	5	13	14
rs4610752	14	8	10280228	rs7831557	10248962	0.780184	rs7820334	10248962	A	G	0.0318525	DBP	8:10248962:A:G	0.4702	MSRA	0	intronic	0.663	6	5	15
rs4631425	14	8	11198792	rs7839307	11239054	0.830869	rs7820334	11239054	T	C	0.0328095	DBP	8:11239054:C:T	0.4602	C8orf12	0	intronic	0.009	5	13	14
rs4840484	14	8	10306432	rs10090800	10297049	0.864096	rs11249905	10297049	C	T	0.0310784	DBP	8:10297049:C:T	0.2276	RP11-981G7.1	1226	intergenic	3.283	6	5	15
rs4840514	14	8	10612925	rs4840514	10612925	1	rs7820334	10612925	A	G	0.00134491	DBP	8:10612925:A:G	0.2833	SOX7:SOX7:CTD-2135J3.3	00:00:00	ncRNA_intronic	0.121	6	5	15
rs4840525	14	8	10796472	rs7005884	10765635	0.752594	rs7820334	10765635	A	C	0.00331182	DBP	8:10765635:A:C	0.4911	XKR6	0	intronic	1.521	2c	5	15
rs4840567	14	8	11347289	rs2736342	11347625	0.942016	rs7820334	11347625	T	C	0.00817048	DBP	8:11347625:C:T	0.4592	BLK	3884	intergenic	10.82	1f	5	9
rs4840570	14	8	11374072	rs11781400	11367730	0.911963	rs7820334	11367730	T	G	0.0474432	DBP	8:11367730:G:T	0.3638	BLK	0	intronic	3.637	4	2	15
rs4841029	14	8	8605632	rs4841029	8605632	1	rs11249905	8605632	A	G	0.0186694	DBP	8:8605632:A:G	0.4384	RP11-211C9.1	0	ncRNA_intronic	0.788	4	5	15
rs4841040	14	8	8661534	rs12547493	8654527	0.926752	rs7820334	8654527	C	T	0.025431	DBP	8:8654527:C:T	0.4304	MFHAS1	0	intronic	2.606	3a	2	5
rs4841045	14	8	8661534	rs12547493	8672579	0.907406	rs7820334	8672579	G	A	0.0235087	DBP	8:8672579:A:G	0.4294	MFHAS1	0	intronic	3.217	7	4	5
rs4841051	14	8	8661534	rs12547493	8685646	0.967996	rs7820334	8685646	C	T	0.017082	DBP	8:8685646:C:T	0.4533	MFHAS1	0	intronic	1.281	1f	2	5
rs4841084	14	8	8850633	rs17701675	8883905	0.746343	rs7820334	8883905	T	C	0.0365653	DBP	8:8883905:C:T	0.4453	ERI1	0	intronic	2.233	2b	2	5
rs4841110	14	8	9071033	rs13260067	9086023	0.864704	rs11249905	9086023	G	A	0.035515	DBP	8:9086023:A:G	0.4175	RP11-10A14.8	4499	intergenic	6.292	6	5	15
rs4841329	14	8	10280228	rs7831557	10253098	0.784999	rs7820334	10253098	A	G	0.036695	DBP	8:10253098:A:G	0.4732	MSRA	0	intronic	2.48	2a	5	15
rs4841410	14	8	10520548	rs4841410	10520548	1	rs7820334	10520548	A	G	0.00256277	DBP	8:10520548:A:G	0.4314	RP1L1	0	intergenic	0.832	5	5	14
rs4841432	14	8	10573702	rs7820334	10583506	0.685567	rs7820334	10583506	G	A	0.00142642	DBP	8:10583506:A:G	0.3777	SOX7:SOX7	00:00:00	exonic	17.85	5	4	14
rs4841452	14	8	10712945	rs877116	10687121	0.811239	rs7820334	10687121	A	G	0.037888	DBP	8:10687121:A:G	0.3917	SOX7:SOX7:PINX1	00:00:00	intronic	4.98	5	4	5
rs4841457	14	8	10796472	rs7005884	10773511	0.883005	rs7820334	10773511	T	G	0.0284873	DBP	8:10773511:G:T	0.4722	XKR6	0	intronic	1.508	4	5	15
rs4841567	14	8	11446421	rs11780420	11440019	0.844986	rs7820334	11440019	G	A	0.0413536	DBP	8:11440019:A:G	0.4423	LINC00208	1167	intergenic	2.025	7	5	14
rs486781	14	8	8661534	rs12547493	8639740	0.930325	rs7820334	8639740	A	G	0.0203006	DBP	8:8639740:A:G	0.4553	RP11-211C9.1	0	ncRNA_exonic	0.189	4	1	5
rs55816468	14	8	8608642	rs57301822	8605876	0.971652	rs12546498	8605876	A	C	0.0452039	DBP	8:8605876:A:C	0.2883	RP11-211C9.1	0	ncRNA_intronic	0.934	6	5	15
rs55848210	14	8	10675832	rs2409655	10693727	0.674162	rs7820334	10693727	C	T	0.033971	DBP	8:10693727:C:T	0.2038	SOX7:SOX7:PINX1	00:00:00	intronic	2.662	7	4	5
rs55860742	14	8	11347289	rs2736342	11358156	0.764977	rs7820334	11358156	T	C	0.0290027	DBP	8:11358156:C:T	0.4692	BLK	0	intronic	3.056	7	5	15
rs55896564	14	8	11446421	rs11780420	11447093	0.848857	rs7820334	11447093	G	A	0.0381773	DBP	8:11447093:A:G	0.4433	LINC00208	8241	intergenic	0.836	1b	1	14
rs56007835	14	8	8608642	rs57301822	8610026	0.985678	rs12546498	8610026	A	G	0.0301275	DBP	8:8610026:A:G	0.2893	RP11-211C9.1	0	ncRNA_intronic	0.321	3a	5	15
rs56046029	14	8	10675832	rs2409655	10693803	0.674162	rs7820334	10693803	C	A	0.0351712	DBP	8:10693803:A:C	0.2038	SOX7:SOX7:PINX1	00:00:00	intronic	12.75	3a	4	5
rs560544	14	8	8661534	rs12547493	8637429	0.925775	rs7820334	8637429	G	A	0.0245612	DBP	8:8637429:A:G	0.4543	RP11-211C9.1	0	ncRNA_intronic	1.071	2b	2	7
rs57211637	14	8	10556785	rs79466810	10552456	0.911486	rs7820334	10552456	G	A	0.0298184	DBP	8:10552456:A:G	0.2376	RP1L1:C8orf74	00:00:00	intronic	3.899	6	5	15
rs57301822	14	8	8608642	rs57301822	8608642	1	rs12546498	8608642	T	C	0.0237186	DBP	8:8608642:C:T	0.2903	RP11-211C9.1	0	ncRNA_intronic	0.53	4	2	15
rs57312668	14	8	8661534	rs12547493	8680477	0.960175	rs7820334	8680477	A	G	0.0476373	DBP	8:8680477:A:G	0.4414	MFHAS1	0	intronic	3.841	5	4	5
rs57348261	14	8	10675832	rs2409655	10669089	0.687695	rs7820334	10669089	A	G	0.0497378	DBP	8:10669089:A:G	0.2048	SOX7:SOX7:PINX1	00:00:00	intronic	1.478	5	4	5
rs58065122	14	8	10520548	rs4841410	10526186	0.968642	rs7820334	10526186	A	G	0.0059625	DBP	8:10526186:A:G	0.4254	RP1L1	0	intergenic	0.216	5	5	15
rs59046059	14	8	8661534	rs12547493	8670736	0.896394	rs7820334	8670736	A	C	0.0266272	DBP	8:8670736:A:C	0.4264	MFHAS1	0	intronic	2.53	7	5	5
rs60167323	14	8	10675832	rs2409655	10590715	0.663445	rs7820334	10590715	A	G	0.0154214	DBP	8:10590715:A:G	0.2097	SOX7:SOX7:CTD-2135J3.3	00:00:00	ncRNA_intronic	9.653	4	1	11
rs60315134	14	8	8661534	rs12547493	8670599	0.907406	rs7820334	8670599	G	A	0.0235087	DBP	8:8670599:A:G	0.4294	MFHAS1	0	intronic	4.763	7	4	5
rs60410697	14	8	10573702	rs7820334	10572617	0.957606	rs7820334	10572617	C	T	0.000245819	DBP	8:10572617:C:T	0.3151	RP1L1	2919	intergenic	1.4	5	5	14
rs609958	14	8	8661534	rs12547493	8633548	0.929955	rs7820334	8633548	T	G	0.022772	DBP	8:8633548:G:T	0.4553	RP11-211C9.1	0	ncRNA_intronic	5.665	NA	5	15
rs6601465	14	8	10321881	rs6601465	10321881	1	rs7820334	10321881	G	A	0.0228618	DBP	8:10321881:A:G	0.3042	RP11-981G7.2	10193	intergenic	4.988	6	5	15
rs6601529	14	8	10712945	rs877116	10670550	0.814202	rs7820334	10670550	T	C	0.0377308	DBP	8:10670550:C:T	0.3966	SOX7:SOX7:PINX1	00:00:00	intronic	1.435	6	4	5
rs6601599	14	8	11347289	rs2736342	11402347	0.726806	rs7820334	11402347	A	G	0.0334222	DBP	8:11402347:A:G	0.4712	BLK	0	intronic	0.031	6	5	15
rs693109	14	8	8661534	rs12547493	8640172	0.890901	rs7820334	8640172	C	A	0.0268703	DBP	8:8640172:A:C	0.4414	RP11-211C9.1	182	upstream	0.231	NA	1	5
rs6980884	14	8	11347289	rs2736342	11362275	0.743692	rs7820334	11362275	C	A	0.0169772	DBP	8:11362275:A:C	0.4672	BLK	0	intronic	0.265	5	5	15
rs6984171	14	8	10734662	rs6984171	10734662	1	rs7820334	10734662	G	A	0.0481941	DBP	8:10734662:A:G	0.3797	XKR6	18892	intergenic	2.125	5	5	14
rs6984496	14	8	10796472	rs7005884	10796093	0.970944	rs7820334	10796093	G	T	0.00415102	DBP	8:10796093:G:T	0.4632	XKR6	0	intronic	1.627	1f	1	15
rs6985109	14	8	10796472	rs7005884	10761585	0.882552	rs7820334	10761585	G	A	0.0154024	DBP	8:10761585:A:G	0.4722	XKR6	0	intronic	1.894	1f	5	15
rs6985207	14	8	8605632	rs4841029	8604423	0.787879	rs11249905	8604423	C	A	0.00918603	DBP	8:8604423:A:C	0.4642	RP11-211C9.1	0	ncRNA_intronic	5.408	6	5	15
rs6985767	14	8	10751709	rs1529598	10752474	0.990752	rs7820334	10752474	G	A	0.0196228	DBP	8:10752474:A:G	0.3002	XKR6	1080	intergenic	0.729	7	5	15
rs6987134	14	8	10805015	rs7821914	10804906	0.823626	rs7820334	10804906	C	T	0.0111158	DBP	8:10804906:C:T	0.3897	XKR6	0	intronic	6.633	5	5	15
rs6989160	14	8	10712945	rs877116	10705360	0.820082	rs7820334	10705360	A	C	0.0469431	DBP	8:10705360:A:C	0.3936	RP11-177H2.2	1348	intergenic	3.98	7	5	14
rs6992534	14	8	8808388	rs35305751	8806799	0.879833	rs11249905	8806799	A	C	0.0467259	DBP	8:8806799:A:C	0.3499	RP11-62H7.2	11910	intergenic	0.05	7	4	15
rs6994038	14	8	8661534	rs12547493	8660538	0.905384	rs7820334	8660538	A	C	0.027881	DBP	8:8660538:A:C	0.4245	MFHAS1	0	intronic	0.886	7	4	5
rs6997799	14	8	10556785	rs79466810	10606421	0.675436	rs7820334	10606421	C	A	0.0378768	DBP	8:10606421:A:C	0.2097	SOX7:SOX7:CTD-2135J3.3	00:00:00	ncRNA_intronic	0.191	7	9	15
rs6997839	14	8	10796472	rs7005884	10766028	0.752594	rs7820334	10766028	C	T	0.00500543	DBP	8:10766028:C:T	0.4911	XKR6	0	intronic	0.519	6	5	15
rs6997997	14	8	10796472	rs7005884	10766082	0.748225	rs7820334	10766082	C	T	0.00469034	DBP	8:10766082:C:T	0.492	XKR6	0	intronic	1.219	7	5	15
rs7000276	14	8	10805015	rs7821914	10804843	0.828008	rs7820334	10804843	A	G	0.005933	DBP	8:10804843:A:G	0.3887	XKR6	0	intronic	2.783	5	5	15
rs7002757	14	8	10675832	rs2409655	10645989	0.692478	rs7820334	10645989	T	C	0.038072	DBP	8:10645989:C:T	0.2058	SOX7:SOX7:PINX1	00:00:00	intronic	0.644	7	4	5
rs7005133	14	8	8907950	rs2044387	8901222	0.801414	rs7820334	8901222	G	T	0.0157584	DBP	8:8901222:G:T	0.4602	ERI1	0	intergenic	2.444	6	5	15
rs7005363	14	8	10280228	rs7831557	10283748	0.82545	rs7820334	10283748	C	T	0.0274252	DBP	8:10283748:C:T	0.4274	MSRA	0	intronic	4.232	1f	2	15
rs7005884	14	8	10796472	rs7005884	10796472	1	rs7820334	10796472	A	G	0.00232985	DBP	8:10796472:A:G	0.4553	XKR6	0	intronic	8.303	5	5	15
rs7005905	14	8	10712945	rs877116	10585144	0.699046	rs7820334	10585144	A	G	0.0483872	DBP	8:10585144:A:G	0.3797	SOX7:SOX7	00:00:00	intronic	4.5	1f	1	13
rs7009920	14	8	10675832	rs2409655	10585162	0.671057	rs7820334	10585162	C	T	0.0156659	DBP	8:10585162:C:T	0.2117	SOX7:SOX7	00:00:00	intronic	4.501	5	1	13
rs7013277	14	8	10805015	rs7821914	10824384	0.797011	rs7820334	10824384	A	C	0.0373104	DBP	8:10824384:A:C	0.3897	XKR6	0	intronic	0.552	5	5	15
rs7013471	14	8	8661534	rs12547493	8687325	0.687185	rs7820334	8687325	A	G	0.033109	DBP	8:8687325:A:G	0.4732	MFHAS1	0	intronic	0.63	6	5	15
rs7014633	14	8	10520548	rs4841410	10518320	0.988155	rs7820334	10518320	A	G	0.004024	DBP	8:10518320:A:G	0.4284	RP1L1	0	intergenic	5.029	4	5	14
rs7015336	14	8	8850633	rs17701675	8830720	0.908823	rs7820334	8830720	A	G	0.0148542	DBP	8:8830720:A:G	0.3907	RP11-62H7.2	0	ncRNA_intronic	2.129	4	1	15
rs7016139	14	8	8907950	rs2044387	8895470	0.733203	rs7820334	8895470	T	C	0.0396674	DBP	8:8895470:C:T	0.4453	ERI1	0	intergenic	5.276	1f	5	15
rs7016385	14	8	10796472	rs7005884	10779472	0.910269	rs7820334	10779472	C	T	0.0103636	DBP	8:10779472:C:T	0.4682	XKR6	0	intronic	3.032	1f	4	9
rs720081	14	8	10556785	rs79466810	10602109	0.679301	rs7820334	10602109	C	T	0.0456326	DBP	8:10602109:C:T	0.2087	SOX7:SOX7:CTD-2135J3.3	00:00:00	ncRNA_intronic	0.312	7	9	15
rs73200724	14	8	10556785	rs79466810	10592331	0.626847	rs7820334	10592331	T	G	0.0394061	DBP	8:10592331:G:T	0.2048	SOX7:SOX7:CTD-2135J3.3	00:00:00	ncRNA_intronic	3.005	3a	2	13
rs73208781	14	8	10675832	rs2409655	10677498	0.687695	rs7820334	10677498	C	A	0.0496958	DBP	8:10677498:A:C	0.2048	SOX7:SOX7:PINX1	00:00:00	intronic	7.179	6	4	5
rs73208782	14	8	10675832	rs2409655	10677555	0.68982	rs7820334	10677555	A	G	0.0497425	DBP	8:10677555:A:G	0.2028	SOX7:SOX7:PINX1	00:00:00	intronic	4.006	6	4	5
rs73208785	14	8	10675832	rs2409655	10678120	0.693644	rs7820334	10678120	C	T	0.0488966	DBP	8:10678120:C:T	0.2038	SOX7:SOX7:PINX1	00:00:00	intronic	5.387	3a	4	5
rs73208789	14	8	10675832	rs2409655	10679187	0.676971	rs7820334	10679187	G	A	0.039828	DBP	8:10679187:A:G	0.2068	SOX7:SOX7:PINX1	00:00:00	intronic	7.81	7	4	5
rs73208791	14	8	10675832	rs2409655	10680338	0.676971	rs7820334	10680338	C	T	0.0408986	DBP	8:10680338:C:T	0.2068	SOX7:SOX7:PINX1	00:00:00	intronic	2.282	7	4	5
rs73208792	14	8	10675832	rs2409655	10680471	0.676971	rs7820334	10680471	T	C	0.0408837	DBP	8:10680471:C:T	0.2068	SOX7:SOX7:PINX1	00:00:00	intronic	0.474	6	4	5
rs73208793	14	8	10675832	rs2409655	10680785	0.676971	rs7820334	10680785	C	T	0.0410659	DBP	8:10680785:C:T	0.2068	SOX7:SOX7:PINX1	00:00:00	intronic	0.917	5	4	4
rs73209913	14	8	10675832	rs2409655	10693123	0.677967	rs7820334	10693123	T	C	0.036214	DBP	8:10693123:C:T	0.2048	SOX7:SOX7:PINX1	00:00:00	intronic	4.034	5	4	5
rs73209918	14	8	10556785	rs79466810	10703264	0.652628	rs7820334	10703264	G	T	0.0396102	DBP	8:10703264:G:T	0.2068	RP11-177H2.2	0	ncRNA_intronic	2.621	6	5	14
rs73209921	14	8	10675832	rs2409655	10707724	0.665066	rs7820334	10707724	T	C	0.0306353	DBP	8:10707724:C:T	0.2008	RP11-177H2.2	3712	intergenic	0.01	7	5	14
rs73209922	14	8	10556785	rs79466810	10708509	0.65214	rs7820334	10708509	G	A	0.0260637	DBP	8:10708509:A:G	0.2087	RP11-177H2.2	4497	intergenic	7.398	5	1	1
rs7350075	14	8	10612925	rs4840514	10624999	0.985121	rs7820334	10624999	A	C	0.00306996	DBP	8:10624999:A:C	0.2843	SOX7:SOX7:CTD-2135J3.3:PINX1	0:0:0:0	ncRNA_intronic	3.148	6	4	5
rs7350124	14	8	10612925	rs4840514	10625045	0.956559	rs7820334	10625045	C	T	0.0024177	DBP	8:10625045:C:T	0.2903	SOX7:SOX7:CTD-2135J3.3:PINX1	0:0:0:0	ncRNA_intronic	0.36	6	4	5
rs7387360	14	8	8907950	rs2044387	8922464	0.680525	rs7820334	8922464	T	C	0.01227	DBP	8:8922464:C:T	0.4364	ERI1	0	intergenic	0.698	5	5	15
rs7461950	14	8	10569428	rs7461950	10569428	1	rs7820334	10569428	C	A	0.046916	DBP	8:10569428:A:C	0.495	RP1L1	0	intergenic	0.007	6	5	14
rs756038	14	8	11347289	rs2736342	11336781	0.79082	rs7820334	11336781	G	A	0.0128957	DBP	8:11336781:A:G	0.4185	FAM167A	4556	intergenic	0.231	3a	5	15
rs77559025	14	8	10675832	rs2409655	10692761	0.674162	rs7820334	10692761	A	C	0.0351877	DBP	8:10692761:A:C	0.2038	SOX7:SOX7:PINX1	00:00:00	intronic	0.016	7	4	5
rs7817252	14	8	10675832	rs2409655	10685932	0.673157	rs7820334	10685932	A	C	0.0427977	DBP	8:10685932:A:C	0.2058	SOX7:SOX7:PINX1	00:00:00	intronic	2.174	7	4	4
rs7820334	14	8	10573702	rs7820334	10573702	1	rs7820334	10573702	T	C	0.000202524	DBP	8:10573702:C:T	0.3101	RP1L1	4004	intergenic	0.087	2b	2	14
rs7821826	14	8	10796472	rs7005884	10769439	0.751025	rs7820334	10769439	T	C	0.00693463	DBP	8:10769439:C:T	0.4881	XKR6	0	intronic	6.843	7	5	15
rs7821914	14	8	10805015	rs7821914	10805015	1	rs7820334	10805015	C	T	0.00419355	DBP	8:10805015:C:T	0.4314	XKR6	0	intronic	3.386	1f	5	15
rs7822109	14	8	11347289	rs2736342	11349147	0.942016	rs7820334	11349147	T	C	0.00962353	DBP	8:11349147:C:T	0.4592	BLK	2362	intergenic	1.633	2b	2	15
rs7823200	14	8	10547758	rs7823200	10547758	1	rs7820334	10547758	C	A	0.00204298	DBP	8:10547758:A:C	0.4702	RP1L1:C8orf74	00:00:00	intronic	2.771	5	5	15
rs7823296	14	8	10796472	rs7005884	10778546	0.906709	rs7820334	10778546	A	G	0.00833417	DBP	8:10778546:A:G	0.4672	XKR6	0	intronic	0.204	5	5	9
rs7823898	14	8	8803487	rs7823898	8803487	1	rs11249905	8803487	G	T	0.0414793	DBP	8:8803487:G:T	0.4046	RP11-62H7.3	11970	intergenic	0.649	7	5	15
rs7824675	14	8	10280228	rs7831557	10243418	0.694291	rs7820334	10243418	C	A	0.0280945	DBP	8:10243418:A:C	0.4414	MSRA	0	intronic	4.557	1f	4	15
rs7825147	14	8	10675832	rs2409655	10589796	0.661718	rs7820334	10589796	G	T	0.015638	DBP	8:10589796:G:T	0.2117	SOX7:SOX7:CTD-2135J3.3	00:00:00	ncRNA_intronic	2.133	4	5	13
rs7827270	14	8	10675832	rs2409655	10590553	0.667802	rs7820334	10590553	T	C	0.0173353	DBP	8:10590553:C:T	0.2087	SOX7:SOX7:CTD-2135J3.3	00:00:00	ncRNA_intronic	10.8	4	1	12
rs7829381	14	8	11347289	rs2736342	11344573	0.942016	rs7820334	11344573	A	G	0.00826494	DBP	8:11344573:A:G	0.4592	BLK	6936	intergenic	4.394	3a	5	15
rs7831557	14	8	10280228	rs7831557	10280228	1	rs7820334	10280228	G	A	0.0212905	DBP	8:10280228:A:G	0.4523	MSRA	0	intronic	1.058	1f	5	15
rs7832968	14	8	8661534	rs12547493	8652889	0.995979	rs7820334	8652889	A	G	0.0141942	DBP	8:8652889:A:G	0.4463	MFHAS1	0	intronic	2.542	6	4	5
rs7833435	14	8	10796472	rs7005884	10801137	0.95944	rs7820334	10801137	A	G	0.00329316	DBP	8:10801137:A:G	0.4642	XKR6	0	intronic	4.387	5	5	15
rs7834121	14	8	10796472	rs7005884	10770255	0.743918	rs7820334	10770255	T	G	0.00706032	DBP	8:10770255:G:T	0.4901	XKR6	0	intronic	4.87	5	5	15
rs7837038	14	8	10796472	rs7005884	10783074	0.762364	rs7820334	10783074	A	G	0.00358749	DBP	8:10783074:A:G	0.4861	XKR6	0	intronic	2.353	5	5	15
rs7838335	14	8	10675832	rs2409655	10589913	0.663445	rs7820334	10589913	T	C	0.018117	DBP	8:10589913:C:T	0.2097	SOX7:SOX7:CTD-2135J3.3	00:00:00	ncRNA_intronic	8.695	4	5	13
rs7839307	14	8	11198792	rs7839307	11198792	1	rs7820334	11198792	A	G	0.0313176	DBP	8:11198792:A:G	0.4642	TDH	0	ncRNA_intronic	2.13	7	5	14
rs7843666	14	8	10796472	rs7005884	10742059	0.741528	rs7820334	10742059	A	G	0.00583498	DBP	8:10742059:A:G	0.4831	XKR6	11495	intergenic	0.854	7	5	14
rs7853	14	8	8850633	rs17701675	8890814	0.758545	rs7820334	8890814	G	A	0.0245318	DBP	8:8890814:A:G	0.4433	ERI1	0	UTR3	2.438	6	4	5
rs79466810	14	8	10556785	rs79466810	10556785	1	rs7820334	10556785	T	C	0.0106991	DBP	8:10556785:C:T	0.2266	RP1L1:C8orf74	00:00:00	intronic	2.743	5	7	15
rs79813735	14	8	10675832	rs2409655	10591003	0.659674	rs7820334	10591003	A	C	0.0161205	DBP	8:10591003:A:C	0.2087	SOX7:SOX7:CTD-2135J3.3	00:00:00	ncRNA_intronic	6.397	2b	1	13
rs877116	14	8	10712945	rs877116	10712945	1	rs7820334	10712945	G	T	0.0107311	DBP	8:10712945:G:T	0.4215	RP11-177H2.2	8933	intergenic	1.926	NA	2	14
rs882462	14	8	8661534	rs12547493	8678530	0.956584	rs7820334	8678530	A	G	0.0343062	DBP	8:8678530:A:G	0.4384	MFHAS1	0	intronic	5.451	NA	2	5
rs891558	14	8	10675832	rs2409655	10623771	0.672309	rs7820334	10623771	A	G	0.0400899	DBP	8:10623771:A:G	0.2078	SOX7:SOX7:CTD-2135J3.3:PINX1	0:0:0:0	ncRNA_intronic	1.355	5	4	5
rs9329221	14	8	10280228	rs7831557	10240202	0.743185	rs7820334	10240202	T	G	0.0406453	DBP	8:10240202:G:T	0.4135	MSRA	0	intronic	7.724	1f	5	15
rs9650658	14	8	10675832	rs2409655	10625241	0.657751	rs7820334	10625241	G	A	0.0401766	DBP	8:10625241:A:G	0.2028	SOX7:SOX7:CTD-2135J3.3:PINX1	0:0:0:0	ncRNA_intronic	9.417	5	4	5
rs978803	14	8	11347289	rs2736342	11343475	0.938186	rs7820334	11343475	A	G	0.00777675	DBP	8:11343475:A:G	0.4583	BLK	8034	intergenic	2.616	6	5	15
rs978804	14	8	11347289	rs2736342	11343673	0.942016	rs7820334	11343673	C	T	0.00791548	DBP	8:11343673:C:T	0.4592	BLK	7836	intergenic	0.375	6	5	15
rs9969626	14	8	10712945	rs877116	10670801	0.814202	rs7820334	10670801	A	C	0.0357519	DBP	8:10670801:A:C	0.3966	SOX7:SOX7:PINX1	00:00:00	intronic	5.3	7	2	5
rs1001932	15	8	53336933	rs34006528	53342616	0.916132	rs391557	53342616	G	T	0.0353901	DBP	8:53342616:G:T	0.326	ST18	0	intergenic	1.898	6	5	15
rs1036715	15	8	53336933	rs34006528	53374007	0.952607	rs391557	53374007	G	A	0.0457363	DBP	8:53374007:A:G	0.3429	ST18	487	intergenic	1.073	7	5	15
rs13279773	15	8	53336933	rs34006528	53341622	0.916132	rs391557	53341622	T	C	0.035965	DBP	8:53341622:C:T	0.326	ST18	0	intergenic	0.002	7	5	15
rs1365880	15	8	53356959	rs391557	53333088	0.929961	rs391557	53333088	T	C	0.0228781	DBP	8:53333088:C:T	0.3022	ST18	0	intergenic	2.849	5	5	15
rs1440786	15	8	53356959	rs391557	53386563	0.708794	rs391557	53386563	T	C	0.0319232	DBP	8:53386563:C:T	0.2753	ST18	13043	intergenic	0.599	5	14	15
rs1660554	15	8	53356959	rs391557	53343969	0.954626	rs391557	53343969	G	A	0.0352042	DBP	8:53343969:A:G	0.3052	ST18	0	intergenic	0.062	NA	7	15
rs1660555	15	8	53356959	rs391557	53338329	0.976311	rs391557	53338329	A	G	0.0356338	DBP	8:53338329:A:G	0.2942	ST18	0	intergenic	0.585	NA	5	15
rs166929	15	8	53356959	rs391557	53364055	0.805434	rs391557	53364055	A	G	0.0423755	DBP	8:53364055:A:G	0.2654	ST18	0	intergenic	3.179	7	5	15
rs1811437	15	8	53356959	rs391557	53384510	0.769066	rs391557	53384510	T	C	0.0449725	DBP	8:53384510:C:T	0.2753	ST18	10990	intergenic	2.122	7	7	15
rs182262	15	8	53356959	rs391557	53346704	0.94504	rs391557	53346704	A	G	0.0324244	DBP	8:53346704:A:G	0.3012	ST18	0	intergenic	0.328	NA	5	15
rs2582635	15	8	53356959	rs391557	53376653	0.791528	rs391557	53376653	G	A	0.0462448	DBP	8:53376653:A:G	0.2704	ST18	3133	intergenic	2.964	NA	5	15
rs2582639	15	8	53356959	rs391557	53373448	0.792482	rs391557	53373448	C	T	0.0466759	DBP	8:53373448:C:T	0.2684	ST18	0	intergenic	9.54	NA	2	15
rs2613259	15	8	53356959	rs391557	53391793	0.62687	rs391557	53391793	A	C	0.0282648	DBP	8:53391793:A:C	0.2485	ST18	18273	intergenic	0.607	NA	9	15
rs2613267	15	8	53356959	rs391557	53386046	0.735628	rs391557	53386046	T	C	0.0297309	DBP	8:53386046:C:T	0.2664	ST18	12526	intergenic	0.097	7	14	15
rs2613268	15	8	53356959	rs391557	53385381	0.769066	rs391557	53385381	C	T	0.0465116	DBP	8:53385381:C:T	0.2753	ST18	11861	intergenic	2.089	NA	9	15
rs2613270	15	8	53356959	rs391557	53381864	0.773561	rs391557	53381864	T	C	0.0396049	DBP	8:53381864:C:T	0.2724	ST18	8344	intergenic	0.498	NA	5	15
rs2613271	15	8	53356959	rs391557	53381624	0.768899	rs391557	53381624	C	T	0.0412808	DBP	8:53381624:C:T	0.2734	ST18	8104	intergenic	4.777	NA	5	15
rs2613279	15	8	53356959	rs391557	53376478	0.791528	rs391557	53376478	G	A	0.0479127	DBP	8:53376478:A:G	0.2704	ST18	2958	intergenic	0.07	NA	5	15
rs284799	15	8	53356959	rs391557	53351183	0.995243	rs391557	53351183	G	T	0.0333623	DBP	8:53351183:G:T	0.2962	ST18	0	intergenic	7.538	NA	2	15
rs284800	15	8	53356959	rs391557	53351137	0.990513	rs391557	53351137	C	T	0.0352042	DBP	8:53351137:C:T	0.2972	ST18	0	intergenic	0.693	NA	2	15
rs284801	15	8	53356959	rs391557	53348475	0.954626	rs391557	53348475	G	A	0.0335771	DBP	8:53348475:A:G	0.3052	ST18	0	intergenic	0.261	NA	5	15
rs284810	15	8	53356959	rs391557	53343063	0.995243	rs391557	53343063	G	A	0.027721	DBP	8:53343063:A:G	0.2962	ST18	0	intergenic	0.881	NA	5	15
rs284813	15	8	53356959	rs391557	53338714	0.98101	rs391557	53338714	G	T	0.0354988	DBP	8:53338714:G:T	0.2952	ST18	0	intergenic	0.295	NA	5	15
rs284814	15	8	53356959	rs391557	53360144	0.995243	rs391557	53360144	G	A	0.0204356	DBP	8:53360144:A:G	0.2962	ST18	0	intergenic	1.482	7	8	15
rs284815	15	8	53356959	rs391557	53361934	0.995243	rs391557	53361934	G	A	0.023493	DBP	8:53361934:A:G	0.2962	ST18	0	intergenic	0.215	NA	5	15
rs284819	15	8	53356959	rs391557	53364500	0.805434	rs391557	53364500	G	A	0.0425504	DBP	8:53364500:A:G	0.2654	ST18	0	intergenic	1.31	6	5	15
rs2926728	15	8	53356959	rs391557	53384689	0.769066	rs391557	53384689	G	A	0.0450064	DBP	8:53384689:A:G	0.2753	ST18	11169	intergenic	2.542	NA	7	15
rs34006528	15	8	53336933	rs34006528	53336933	1	rs391557	53336933	A	G	0.0267479	DBP	8:53336933:A:G	0.34	ST18	0	intergenic	17.2	6	1	15
rs391557	15	8	53356959	rs391557	53356959	1	rs391557	53356959	T	C	0.0175834	DBP	8:53356959:C:T	0.2952	ST18	0	intergenic	0.236	NA	5	15
rs416292	15	8	53356959	rs391557	53337584	0.981064	rs391557	53337584	T	C	0.0348719	DBP	8:53337584:C:T	0.2932	ST18	0	intergenic	9.819	NA	2	15
rs4873211	15	8	53336933	rs34006528	53338897	1	rs391557	53338897	T	C	0.0292598	DBP	8:53338897:C:T	0.34	ST18	0	intergenic	0.247	4	5	15
rs6989190	15	8	53356959	rs391557	53380895	0.77825	rs391557	53380895	C	T	0.0419844	DBP	8:53380895:C:T	0.2714	ST18	7375	intergenic	2.905	4	2	15
rs7012920	15	8	53356959	rs391557	53380905	0.77825	rs391557	53380905	T	C	0.0446512	DBP	8:53380905:C:T	0.2714	ST18	7385	intergenic	2.03	4	2	15
rs716583	15	8	53356959	rs391557	53335677	0.976311	rs391557	53335677	C	T	0.0485741	DBP	8:53335677:C:T	0.2942	ST18	0	intergenic	4.681	NA	2	15
rs10481272	16	8	82796272	rs10481273	82794296	1	rs10481273	82794296	G	A	0.0468799	DBP	8:82794296:A:G	0.4781	RP11-354A14.1	3315	intergenic	2.513	6	13	15
rs10481273	16	8	82796272	rs10481273	82796272	1	rs10481273	82796272	C	T	0.0410659	DBP	8:82796272:C:T	0.4781	RP11-354A14.1	1339	intergenic	2.495	6	7	15
rs10958049	16	8	82796272	rs10481273	82798338	1	rs10481273	82798338	A	G	0.0474698	DBP	8:82798338:A:G	0.4781	RP11-354A14.1	0	ncRNA_intronic	1.195	7	14	15
rs12056662	16	8	82796272	rs10481273	82792905	1	rs10481273	82792905	A	G	0.0447733	DBP	8:82792905:A:G	0.4781	RP11-354A14.1	4706	intergenic	4.742	5	14	15
rs12545172	16	8	82796272	rs10481273	82799823	0.996219	rs10481273	82799823	T	C	0.0453714	DBP	8:82799823:C:T	0.4771	RP11-354A14.1	0	ncRNA_intronic	10.58	5	14	15
rs1452002	16	8	82796272	rs10481273	82801603	1	rs10481273	82801603	A	G	0.0473013	DBP	8:82801603:A:G	0.4781	RP11-354A14.1	0	ncRNA_intronic	17.27	6	5	15
rs1597752	16	8	82796272	rs10481273	82781071	0.996206	rs10481273	82781071	T	C	0.0469836	DBP	8:82781071:C:T	0.4791	RP11-354A14.1	16540	intergenic	6.324	NA	13	15
rs1597753	16	8	82796272	rs10481273	82780523	0.996206	rs10481273	82780523	A	G	0.0463555	DBP	8:82780523:A:G	0.4791	RP11-354A14.1	17088	intergenic	5.633	NA	13	15
rs17714081	16	8	82796272	rs10481273	82793651	0.996206	rs10481273	82793651	G	T	0.047483	DBP	8:82793651:G:T	0.4771	RP11-354A14.1	3960	intergenic	1.518	7	14	15
rs2400545	16	8	82796272	rs10481273	82786152	1	rs10481273	82786152	G	A	0.0472166	DBP	8:82786152:A:G	0.4781	RP11-354A14.1	11459	intergenic	1.176	7	13	15
rs28417595	16	8	82796272	rs10481273	82797404	1	rs10481273	82797404	G	A	0.0464383	DBP	8:82797404:A:G	0.4781	RP11-354A14.1	207	upstream	0.757	6	5	15
rs28432731	16	8	82796272	rs10481273	82797678	1	rs10481273	82797678	G	A	0.0474963	DBP	8:82797678:A:G	0.4781	RP11-354A14.1	0	ncRNA_intronic	0.134	6	5	15
rs28675380	16	8	82796272	rs10481273	82801003	1	rs10481273	82801003	G	A	0.0457552	DBP	8:82801003:A:G	0.4781	RP11-354A14.1	0	ncRNA_intronic	6.351	5	5	15
rs35498340	16	8	82796272	rs10481273	82790536	1	rs10481273	82790536	C	T	0.0462078	DBP	8:82790536:C:T	0.4781	RP11-354A14.1	7075	intergenic	2.075	6	14	15
rs7388363	16	8	82796272	rs10481273	82790725	1	rs10481273	82790725	T	C	0.0462494	DBP	8:82790725:C:T	0.4781	RP11-354A14.1	6886	intergenic	0.559	6	14	15
rs7815442	16	8	82796272	rs10481273	82787027	1	rs10481273	82787027	T	C	0.0447441	DBP	8:82787027:C:T	0.4781	RP11-354A14.1	10584	intergenic	16.54	7	13	15
rs9792170	16	8	82796272	rs10481273	82799145	1	rs10481273	82799145	A	G	0.0461986	DBP	8:82799145:A:G	0.4781	RP11-354A14.1	0	ncRNA_intronic	15.03	6	14	15
rs12828318	17	12	133781163	rs36174733	133766122	0.97845	rs36174733	133766122	G	A	0.0492869	DBP	12:133766122:A:G	0.163	ZNF268:CTD-2140B24.4	00:00:00	intronic	4.288	5	4	8
rs36127550	17	12	133781163	rs36174733	133780309	0.971286	rs36174733	133780309	T	G	0.0392374	DBP	12:133780309:G:T	0.1581	ZNF268	0	exonic	11.74	4	5	8
rs36174733	17	12	133781163	rs36174733	133781163	1	rs36174733	133781163	G	A	0.0296682	DBP	12:133781163:A:G	0.162	ZNF268	0	UTR3	1.386	3a	8	8
rs112635299	18	14	94838142	rs112635299	94838142	1	rs112635299	94838142	T	G	0.0108631	DBP	14:94838142:G:T	0.0169	SERPINA1	4941	intergenic	0.272	5	5	15
rs28929474	18	14	94838142	rs112635299	94844947	0.881944	rs112635299	94844947	T	C	0.0188316	DBP	14:94844947:C:T	0.0169	SERPINA1	0	exonic	20.2	NA	4	15
rs12917054	19	15	85423857	rs12917054	85423857	1	rs12917054	85423857	T	C	0.0237572	DBP	15:85423857:C:T	0.2207	SLC28A1	4027	intergenic	7.917	7	5	15
rs12917429	19	15	85423857	rs12917054	85425097	0.973139	rs12917054	85425097	T	G	0.047904	DBP	15:85425097:G:T	0.2157	SLC28A1	2787	intergenic	0.491	1f	5	15
rs10221243	20	17	44293205	rs2696609	44212310	0.98964	rs2696609	44212310	A	G	0.00574518	DBP	17:44212310:A:G	0.2465	KANSL1	0	intronic	0.169	6	4	5
rs10445333	20	17	44293205	rs2696609	43916509	0.953951	rs2696609	43916509	G	A	0.0108952	DBP	17:43916509:A:G	0.2396	CRHR1	3314	intergenic	9.333	5	5	15
rs10445334	20	17	44293205	rs2696609	43934826	0.953951	rs2696609	43934826	G	T	0.0112774	DBP	17:43934826:G:T	0.2396	MAPT-AS1	0	ncRNA_intronic	0.323	6	5	14
rs10445336	20	17	44293205	rs2696609	43934948	0.953951	rs2696609	43934948	G	A	0.0112774	DBP	17:43934948:A:G	0.2396	MAPT-AS1	0	ncRNA_intronic	2.205	7	5	14
rs10445337	20	17	44293205	rs2696609	44067400	0.958962	rs2696609	44067400	C	T	0.0142274	DBP	17:44067400:C:T	0.2406	MAPT	0	exonic	19.15	1f	4	15
rs10445338	20	17	44293205	rs2696609	44067682	0.958962	rs2696609	44067682	A	G	0.012997	DBP	17:44067682:A:G	0.2406	MAPT	0	intronic	0.413	1f	4	15
rs10445362	20	17	44293205	rs2696609	43914554	0.953951	rs2696609	43914554	A	C	0.0109299	DBP	17:43914554:A:C	0.2396	CRHR1	1359	intergenic	4.857	5	5	15
rs10445363	20	17	44293205	rs2696609	43914558	0.953951	rs2696609	43914558	A	G	0.0106358	DBP	17:43914558:A:G	0.2396	CRHR1	1363	intergenic	0.374	5	5	15
rs10445364	20	17	44293205	rs2696609	43916356	0.953951	rs2696609	43916356	A	G	0.0109068	DBP	17:43916356:A:G	0.2396	CRHR1	3161	intergenic	1.099	1f	5	15
rs10445369	20	17	44293205	rs2696609	43934776	0.953951	rs2696609	43934776	G	A	0.0112774	DBP	17:43934776:A:G	0.2396	MAPT-AS1	0	ncRNA_intronic	2.669	7	5	14
rs10445370	20	17	44293205	rs2696609	43935118	0.953951	rs2696609	43935118	A	G	0.0112774	DBP	17:43935118:A:G	0.2396	MAPT-AS1	0	ncRNA_intronic	11.29	6	5	14
rs10445371	20	17	44293205	rs2696609	44065410	0.958962	rs2696609	44065410	A	G	0.0132944	DBP	17:44065410:A:G	0.2406	MAPT	0	intronic	5.075	1f	4	15
rs10451283	20	17	44293205	rs2696609	43814020	0.948607	rs2696609	43814020	C	T	0.00933184	DBP	17:43814020:C:T	0.2406	CRHR1:RP11-105N13.4	00:00:00	ncRNA_intronic	0.851	5	5	14
rs10491144	20	17	44293205	rs2696609	43773124	0.953951	rs2696609	43773124	C	A	0.0137371	DBP	17:43773124:A:C	0.2396	CRHR1:RP11-105N13.4	00:00:00	ncRNA_intronic	4.718	NA	13	14
rs10514879	20	17	44293205	rs2696609	43802971	0.953951	rs2696609	43802971	T	C	0.0121876	DBP	17:43802971:C:T	0.2396	CRHR1:RP11-105N13.4	00:00:00	ncRNA_intronic	2.178	NA	9	14
rs10514897	20	17	44293205	rs2696609	44117397	0.958962	rs2696609	44117397	G	A	0.014339	DBP	17:44117397:A:G	0.2406	KANSL1	0	intronic	7.578	1f	4	4
rs10514898	20	17	44293205	rs2696609	44119636	0.958962	rs2696609	44119636	C	A	0.0142626	DBP	17:44119636:A:C	0.2406	KANSL1	0	intronic	4.198	6	4	4
rs10514901	20	17	44293205	rs2696609	44194735	0.958962	rs2696609	44194735	T	G	0.0115472	DBP	17:44194735:G:T	0.2406	KANSL1	0	intronic	2.512	1f	5	5
rs10514904	20	17	44293205	rs2696609	44207887	0.958962	rs2696609	44207887	T	C	0.0109599	DBP	17:44207887:C:T	0.2406	KANSL1	0	intronic	6.32	1f	2	7
rs1052551	20	17	44293205	rs2696609	44068924	0.958962	rs2696609	44068924	A	G	0.012955	DBP	17:44068924:A:G	0.2406	MAPT	0	exonic	1.881	5	4	15
rs1052553	20	17	44293205	rs2696609	44073889	0.953624	rs2696609	44073889	G	A	0.0119782	DBP	17:44073889:A:G	0.2416	MAPT	0	exonic	12.06	1f	4	15
rs1052587	20	17	44293205	rs2696609	44102604	0.958962	rs2696609	44102604	C	T	0.0122632	DBP	17:44102604:C:T	0.2406	MAPT	0	UTR3	1	1f	4	5
rs1052590	20	17	44293205	rs2696609	44102638	0.958962	rs2696609	44102638	G	A	0.0131645	DBP	17:44102638:A:G	0.2406	MAPT	0	UTR3	6.413	5	4	5
rs1078268	20	17	44293205	rs2696609	44075901	0.958962	rs2696609	44075901	G	A	0.011252	DBP	17:44075901:A:G	0.2406	MAPT	0	intronic	0.349	1f	4	15
rs1078269	20	17	44293205	rs2696609	44075837	0.958962	rs2696609	44075837	C	T	0.0127231	DBP	17:44075837:C:T	0.2406	MAPT	0	intronic	5.011	5	4	15
rs1078830	20	17	44293205	rs2696609	43946112	0.953951	rs2696609	43946112	C	T	0.0124359	DBP	17:43946112:C:T	0.2396	MAPT-AS1	0	ncRNA_intronic	6.573	6	5	14
rs1105569	20	17	44293205	rs2696609	43793388	0.953951	rs2696609	43793388	T	C	0.0121195	DBP	17:43793388:C:T	0.2396	CRHR1:RP11-105N13.4	00:00:00	ncRNA_intronic	1.844	NA	5	14
rs1105570	20	17	44293205	rs2696609	43793342	0.953951	rs2696609	43793342	G	A	0.0121299	DBP	17:43793342:A:G	0.2396	CRHR1:RP11-105N13.4	00:00:00	ncRNA_intronic	7.713	NA	5	14
rs1107820	20	17	44293205	rs2696609	44135359	0.958962	rs2696609	44135359	C	T	0.0133339	DBP	17:44135359:C:T	0.2406	KANSL1	0	intronic	2.681	NA	2	5
rs11079717	20	17	44293205	rs2696609	43835351	0.953951	rs2696609	43835351	C	T	0.0119841	DBP	17:43835351:C:T	0.2396	CRHR1:RP11-105N13.4	00:00:00	ncRNA_intronic	4.034	1f	5	14
rs11079719	20	17	44293205	rs2696609	43840006	0.932793	rs2696609	43840006	G	T	0.0252916	DBP	17:43840006:G:T	0.2435	CRHR1:RP11-105N13.4	00:00:00	ncRNA_intronic	9.06	1f	5	14
rs11079720	20	17	44293205	rs2696609	43840016	0.948973	rs2696609	43840016	A	G	0.0167259	DBP	17:43840016:A:G	0.2386	CRHR1:RP11-105N13.4	00:00:00	ncRNA_intronic	6.475	1f	5	14
rs11079721	20	17	44293205	rs2696609	43840107	0.953951	rs2696609	43840107	A	C	0.0136233	DBP	17:43840107:A:C	0.2396	CRHR1:RP11-105N13.4	00:00:00	ncRNA_intronic	5.565	1f	5	14
rs11079723	20	17	44293205	rs2696609	43841729	0.948607	rs2696609	43841729	C	T	0.012038	DBP	17:43841729:C:T	0.2406	CRHR1:RP11-105N13.4	00:00:00	ncRNA_intronic	2.296	1f	5	14
rs11079724	20	17	44293205	rs2696609	43841912	0.953951	rs2696609	43841912	T	C	0.0134014	DBP	17:43841912:C:T	0.2396	CRHR1:RP11-105N13.4	00:00:00	ncRNA_intronic	4.166	1f	5	14
rs11079725	20	17	44293205	rs2696609	43923934	0.953951	rs2696609	43923934	C	T	0.0105538	DBP	17:43923934:C:T	0.2396	MAPT-AS1:SPPL2C	00:00:00	exonic	0.169	1f	5	15
rs11079729	20	17	44293205	rs2696609	44115569	0.958962	rs2696609	44115569	A	C	0.0156659	DBP	17:44115569:A:C	0.2406	KANSL1	0	intronic	5.501	6	4	4
rs111259120	20	17	44293205	rs2696609	44133534	0.958962	rs2696609	44133534	T	C	0.0133299	DBP	17:44133534:C:T	0.2406	KANSL1	0	intronic	3.822	7	4	5
rs111273167	20	17	44293205	rs2696609	43740967	0.953951	rs2696609	43740967	T	C	0.0140551	DBP	17:43740967:C:T	0.2396	CRHR1:RP11-105N13.4	00:00:00	ncRNA_intronic	6.087	7	5	14
rs111295615	20	17	44293205	rs2696609	44184428	0.958962	rs2696609	44184428	C	T	0.0120415	DBP	17:44184428:C:T	0.2406	KANSL1	0	intronic	3.867	4	2	7
rs111324579	20	17	44293205	rs2696609	44082181	0.958962	rs2696609	44082181	G	A	0.0125061	DBP	17:44082181:A:G	0.2406	MAPT	0	intronic	0.582	7	5	15
rs111327992	20	17	44293205	rs2696609	44126691	0.958962	rs2696609	44126691	A	G	0.0133299	DBP	17:44126691:A:G	0.2406	KANSL1	0	intronic	0.979	6	4	4
rs111364350	20	17	44293205	rs2696609	44168508	0.958962	rs2696609	44168508	T	C	0.0125005	DBP	17:44168508:C:T	0.2406	KANSL1	0	intronic	0.612	5	4	5
rs111370985	20	17	44293205	rs2696609	43852742	0.953951	rs2696609	43852742	C	T	0.0129739	DBP	17:43852742:C:T	0.2396	CRHR1:RP11-105N13.4	00:00:00	ncRNA_intronic	5.079	5	5	14
rs111372048	20	17	44293205	rs2696609	44136577	0.958962	rs2696609	44136577	C	A	0.0128744	DBP	17:44136577:A:C	0.2406	KANSL1	0	intronic	5.134	6	4	5
rs111374028	20	17	44293205	rs2696609	43846820	0.953951	rs2696609	43846820	A	G	0.0130452	DBP	17:43846820:A:G	0.2396	CRHR1:RP11-105N13.4	00:00:00	ncRNA_intronic	3.475	7	5	14
rs111415173	20	17	44293205	rs2696609	43795573	0.953951	rs2696609	43795573	T	C	0.0121195	DBP	17:43795573:C:T	0.2396	CRHR1:RP11-105N13.4	00:00:00	ncRNA_intronic	0.477	6	5	14
rs111424940	20	17	44293205	rs2696609	44211502	0.958962	rs2696609	44211502	A	G	0.01227	DBP	17:44211502:A:G	0.2406	KANSL1	0	intronic	5.515	7	4	5
rs111447859	20	17	44293205	rs2696609	43987184	0.953951	rs2696609	43987184	C	T	0.012456	DBP	17:43987184:C:T	0.2396	MAPT:RP11-669E14.4	00:00:00	ncRNA_intronic	0.672	7	5	14
rs111497072	20	17	44293205	rs2696609	43824201	0.953951	rs2696609	43824201	A	G	0.0113378	DBP	17:43824201:A:G	0.2396	CRHR1:RP11-105N13.4	00:00:00	ncRNA_intronic	0.015	6	5	14
rs111519055	20	17	44293205	rs2696609	44159672	0.958962	rs2696609	44159672	G	A	0.0127414	DBP	17:44159672:A:G	0.2406	KANSL1	0	intronic	7.422	5	4	5
rs111520035	20	17	44293205	rs2696609	44039410	0.953729	rs2696609	44039410	G	A	0.0126382	DBP	17:44039410:A:G	0.2416	MAPT	0	intronic	5.088	5	4	14
rs111541901	20	17	44293205	rs2696609	43994358	0.953951	rs2696609	43994358	T	C	0.0114713	DBP	17:43994358:C:T	0.2396	MAPT	0	intronic	1.808	5	4	15
rs111652694	20	17	44293205	rs2696609	44067831	0.958962	rs2696609	44067831	C	T	0.0131273	DBP	17:44067831:C:T	0.2406	MAPT	0	intronic	5.218	7	4	15
rs111676341	20	17	44293205	rs2696609	44183403	0.958962	rs2696609	44183403	G	A	0.0120415	DBP	17:44183403:A:G	0.2406	KANSL1	0	intronic	5.829	5	4	5
rs111678697	20	17	44293205	rs2696609	44197032	0.958962	rs2696609	44197032	C	T	0.0116098	DBP	17:44197032:C:T	0.2406	KANSL1	0	intronic	0.212	5	3	5
rs111724389	20	17	44293205	rs2696609	44209364	0.958962	rs2696609	44209364	A	G	0.011511	DBP	17:44209364:A:G	0.2406	KANSL1	0	intronic	0.445	5	4	5
rs1117253	20	17	44293205	rs2696609	44149297	0.958962	rs2696609	44149297	C	A	0.0123358	DBP	17:44149297:A:C	0.2406	KANSL1	0	intronic	0.753	1f	4	5
rs111739681	20	17	44293205	rs2696609	43898459	0.953951	rs2696609	43898459	T	C	0.00990784	DBP	17:43898459:C:T	0.2396	CRHR1	0	intronic	10.35	5	5	15
rs111853996	20	17	44293205	rs2696609	44130878	0.958962	rs2696609	44130878	G	A	0.0133339	DBP	17:44130878:A:G	0.2406	KANSL1	0	intronic	2.774	6	4	5
rs111913701	20	17	44293205	rs2696609	44159631	0.958962	rs2696609	44159631	G	T	0.0127414	DBP	17:44159631:G:T	0.2406	KANSL1	0	intronic	3.243	7	4	5
rs111952388	20	17	44293205	rs2696609	44181454	0.958962	rs2696609	44181454	T	C	0.0120287	DBP	17:44181454:C:T	0.2406	KANSL1	0	intronic	1.9	6	5	5
rs111970616	20	17	44293205	rs2696609	44169581	0.958962	rs2696609	44169581	C	T	0.0118442	DBP	17:44169581:C:T	0.2406	KANSL1	0	intronic	1.18	6	4	5
rs111976319	20	17	44293205	rs2696609	44095335	0.958962	rs2696609	44095335	A	C	0.0139766	DBP	17:44095335:A:C	0.2406	MAPT	0	intronic	2.242	7	5	15
rs112058117	20	17	44293205	rs2696609	44041562	0.958962	rs2696609	44041562	T	G	0.012094	DBP	17:44041562:G:T	0.2406	MAPT	0	intronic	1.078	2b	4	14
rs112074397	20	17	44293205	rs2696609	44131022	0.958962	rs2696609	44131022	C	T	0.0133339	DBP	17:44131022:C:T	0.2406	KANSL1	0	intronic	3.68	6	4	5
rs112102887	20	17	44293205	rs2696609	44179749	0.958962	rs2696609	44179749	A	G	0.0120287	DBP	17:44179749:A:G	0.2406	KANSL1	0	intronic	3.106	6	2	5
rs112116311	20	17	44293205	rs2696609	43989898	0.953951	rs2696609	43989898	G	T	0.0123539	DBP	17:43989898:G:T	0.2396	MAPT	0	intronic	2.302	5	4	9
rs112137135	20	17	44293205	rs2696609	43900817	0.953951	rs2696609	43900817	G	A	0.0100735	DBP	17:43900817:A:G	0.2396	CRHR1	0	intronic	7.258	4	5	15
rs112155389	20	17	44293205	rs2696609	43758078	0.953951	rs2696609	43758078	A	G	0.0139854	DBP	17:43758078:A:G	0.2396	CRHR1:RP11-105N13.4	00:00:00	ncRNA_intronic	1.646	7	5	14
rs112169475	20	17	44293205	rs2696609	43760192	0.953951	rs2696609	43760192	G	A	0.0139908	DBP	17:43760192:A:G	0.2396	CRHR1:RP11-105N13.4	00:00:00	ncRNA_intronic	3.703	7	5	14
rs112197756	20	17	44293205	rs2696609	44154105	0.958962	rs2696609	44154105	G	A	0.0127414	DBP	17:44154105:A:G	0.2406	KANSL1	0	intronic	4.875	6	4	5
rs112206871	20	17	44293205	rs2696609	44041817	0.958962	rs2696609	44041817	G	A	0.0129402	DBP	17:44041817:A:G	0.2406	MAPT	0	intronic	0.07	6	4	14
rs1122380	20	17	44293205	rs2696609	44206079	0.958962	rs2696609	44206079	T	C	0.0116056	DBP	17:44206079:C:T	0.2406	KANSL1	0	intronic	3.129	NA	2	7
rs1122381	20	17	44293205	rs2696609	44205839	0.958962	rs2696609	44205839	G	A	0.0116098	DBP	17:44205839:A:G	0.2406	KANSL1	0	intronic	4.494	NA	2	5
rs112275277	20	17	44293205	rs2696609	43981958	0.953951	rs2696609	43981958	T	C	0.0123222	DBP	17:43981958:C:T	0.2396	MAPT	0	intronic	1.534	6	5	14
rs112333322	20	17	44293205	rs2696609	44126673	0.958962	rs2696609	44126673	G	A	0.0133339	DBP	17:44126673:A:G	0.2406	KANSL1	0	intronic	3.771	6	4	4
rs112385572	20	17	44293205	rs2696609	44066172	0.958962	rs2696609	44066172	G	A	0.0131273	DBP	17:44066172:A:G	0.2406	MAPT	0	intronic	7.407	5	4	15
rs112415880	20	17	44293205	rs2696609	44042868	0.958962	rs2696609	44042868	A	G	0.0129539	DBP	17:44042868:A:G	0.2406	MAPT	0	intronic	0.169	6	4	14
rs112431991	20	17	44293205	rs2696609	43758885	0.953951	rs2696609	43758885	G	A	0.0139908	DBP	17:43758885:A:G	0.2396	CRHR1:RP11-105N13.4	00:00:00	ncRNA_intronic	1.009	5	5	14
rs112454267	20	17	44293205	rs2696609	44005329	0.948737	rs2696609	44005329	A	G	0.0132394	DBP	17:44005329:A:G	0.2406	MAPT	0	intronic	0.706	5	5	9
rs112570965	20	17	44293205	rs2696609	43801092	0.953951	rs2696609	43801092	C	T	0.0122632	DBP	17:43801092:C:T	0.2396	CRHR1:RP11-105N13.4	00:00:00	ncRNA_intronic	11.18	5	9	14
rs112572874	20	17	44293205	rs2696609	44072984	0.958962	rs2696609	44072984	G	A	0.0129296	DBP	17:44072984:A:G	0.2406	MAPT	0	intronic	5.348	5	4	15
rs112578465	20	17	44293205	rs2696609	44125066	0.958962	rs2696609	44125066	T	C	0.0138304	DBP	17:44125066:C:T	0.2406	KANSL1	0	intronic	1.101	7	4	4
rs112583797	20	17	44293205	rs2696609	43918418	0.953951	rs2696609	43918418	G	A	0.010953	DBP	17:43918418:A:G	0.2396	MAPT-AS1	2598	intergenic	1.863	7	5	15
rs112596352	20	17	44293205	rs2696609	44170238	0.958962	rs2696609	44170238	A	G	0.0123697	DBP	17:44170238:A:G	0.2406	KANSL1	0	intronic	4.51	6	4	5
rs112647192	20	17	44293205	rs2696609	43994623	0.953951	rs2696609	43994623	A	G	0.0114713	DBP	17:43994623:A:G	0.2396	MAPT	0	intronic	0.013	4	4	14
rs112746008	20	17	44293205	rs2696609	44126650	0.958962	rs2696609	44126650	T	C	0.0133299	DBP	17:44126650:C:T	0.2406	KANSL1	0	intronic	3.821	6	4	4
rs112813897	20	17	44293205	rs2696609	44196799	0.958962	rs2696609	44196799	A	G	0.0116056	DBP	17:44196799:A:G	0.2406	KANSL1	0	intronic	2.294	7	5	5
rs112893440	20	17	44293205	rs2696609	44179969	0.958962	rs2696609	44179969	A	G	0.0120287	DBP	17:44179969:A:G	0.2406	KANSL1	0	intronic	3.8	5	2	5
rs112915466	20	17	44293205	rs2696609	43958744	0.953951	rs2696609	43958744	G	A	0.0122689	DBP	17:43958744:A:G	0.2396	MAPT-AS1	0	ncRNA_intronic	3.013	6	9	14
rs112950348	20	17	44293205	rs2696609	44033188	0.953951	rs2696609	44033188	A	G	0.0119239	DBP	17:44033188:A:G	0.2396	MAPT	0	intronic	3.268	7	5	14
rs112995313	20	17	44293205	rs2696609	43795768	0.953951	rs2696609	43795768	C	T	0.0121299	DBP	17:43795768:C:T	0.2396	CRHR1:RP11-105N13.4	00:00:00	ncRNA_intronic	8.762	6	5	14
rs113120855	20	17	44293205	rs2696609	44203520	0.953729	rs2696609	44203520	T	C	0.0143895	DBP	17:44203520:C:T	0.2416	KANSL1	0	intronic	7.24	5	4	5
rs113134013	20	17	44293205	rs2696609	44066995	0.958962	rs2696609	44066995	T	C	0.0132944	DBP	17:44066995:C:T	0.2406	MAPT	0	intronic	0.049	7	4	15
rs113277432	20	17	44293205	rs2696609	44033169	0.953951	rs2696609	44033169	C	T	0.011931	DBP	17:44033169:C:T	0.2396	MAPT	0	intronic	3.744	6	5	14
rs113327263	20	17	44293205	rs2696609	43965063	0.953951	rs2696609	43965063	C	T	0.0126568	DBP	17:43965063:C:T	0.2396	MAPT-AS1	0	ncRNA_intronic	0.944	7	14	14
rs113347741	20	17	44293205	rs2696609	43973408	0.953951	rs2696609	43973408	T	C	0.0127512	DBP	17:43973408:C:T	0.2396	MAPT	0	intronic	10.18	4	1	11
rs113395365	20	17	44293205	rs2696609	44025650	0.953951	rs2696609	44025650	C	T	0.010953	DBP	17:44025650:C:T	0.2396	MAPT	0	intronic	4.146	5	5	14
rs113414067	20	17	44293205	rs2696609	43955093	0.953951	rs2696609	43955093	C	T	0.0121657	DBP	17:43955093:C:T	0.2396	MAPT-AS1	0	ncRNA_intronic	3.434	5	9	14
rs113434679	20	17	44293205	rs2696609	44126765	0.76357	rs2696609	44126765	A	C	0.0210676	DBP	17:44126765:A:C	0.2028	KANSL1	0	intronic	2.31	6	4	4
rs113520245	20	17	44293205	rs2696609	44033132	0.953951	rs2696609	44033132	T	C	0.0121715	DBP	17:44033132:C:T	0.2396	MAPT	0	intronic	5.11	6	5	14
rs113537106	20	17	44293205	rs2696609	44016462	0.953951	rs2696609	44016462	G	A	0.0118657	DBP	17:44016462:A:G	0.2396	MAPT	0	intronic	2.502	6	5	14
rs113589236	20	17	44293205	rs2696609	43981795	0.953951	rs2696609	43981795	A	G	0.0123245	DBP	17:43981795:A:G	0.2396	MAPT	0	intronic	0.067	7	5	14
rs113638513	20	17	44293205	rs2696609	44204749	0.958962	rs2696609	44204749	G	A	0.0116098	DBP	17:44204749:A:G	0.2406	KANSL1	0	intronic	5.282	5	4	5
rs113661667	20	17	44293205	rs2696609	43791610	0.953951	rs2696609	43791610	C	T	0.0121299	DBP	17:43791610:C:T	0.2396	CRHR1:RP11-105N13.4	00:00:00	ncRNA_intronic	5.133	6	5	14
rs113728380	20	17	44293205	rs2696609	43760199	0.953951	rs2696609	43760199	T	C	0.0140638	DBP	17:43760199:C:T	0.2396	CRHR1:RP11-105N13.4	00:00:00	ncRNA_intronic	2.131	6	5	14
rs113756354	20	17	44293205	rs2696609	44013483	0.953951	rs2696609	44013483	G	A	0.0114874	DBP	17:44013483:A:G	0.2396	MAPT	0	intronic	0.837	2b	1	14
rs113788190	20	17	44293205	rs2696609	44161302	0.958962	rs2696609	44161302	G	A	0.0125724	DBP	17:44161302:A:G	0.2406	KANSL1	0	intronic	3.903	6	4	5
rs113793114	20	17	44293205	rs2696609	44037079	0.953951	rs2696609	44037079	A	G	0.0128424	DBP	17:44037079:A:G	0.2396	MAPT	0	intronic	0.685	7	5	14
rs113819830	20	17	43302259	rs12449792	43292279	0.983371	rs12449792	43292279	T	C	0.0211636	DBP	17:43292279:C:T	0.4175	CTD-2020K17.1	0	ncRNA_intronic	0.719	6	4	15
rs113834264	20	17	44293205	rs2696609	43979622	0.953951	rs2696609	43979622	A	G	0.0123245	DBP	17:43979622:A:G	0.2396	MAPT	0	intronic	1.134	7	5	14
rs113856644	20	17	44293205	rs2696609	43932277	0.953951	rs2696609	43932277	A	G	0.0119688	DBP	17:43932277:A:G	0.2396	MAPT-AS1	0	ncRNA_intronic	4.078	7	5	14
rs113857334	20	17	44293205	rs2696609	44044940	0.958962	rs2696609	44044940	C	T	0.0130065	DBP	17:44044940:C:T	0.2406	MAPT	0	intronic	1.151	5	2	15
rs113871181	20	17	44293205	rs2696609	43852733	0.953951	rs2696609	43852733	A	G	0.0129781	DBP	17:43852733:A:G	0.2396	CRHR1:RP11-105N13.4	00:00:00	ncRNA_intronic	1.826	5	5	14
rs113909426	20	17	44293205	rs2696609	44196822	0.958962	rs2696609	44196822	A	G	0.0116056	DBP	17:44196822:A:G	0.2406	KANSL1	0	intronic	0.594	6	5	5
rs113934115	20	17	44293205	rs2696609	43847039	0.953951	rs2696609	43847039	T	C	0.0130452	DBP	17:43847039:C:T	0.2396	CRHR1:RP11-105N13.4	00:00:00	ncRNA_intronic	2.416	7	5	14
rs113952577	20	17	44293205	rs2696609	44010661	0.953951	rs2696609	44010661	G	A	0.0112509	DBP	17:44010661:A:G	0.2396	MAPT	0	intronic	3.527	7	1	14
rs113991678	20	17	44293205	rs2696609	43795634	0.948973	rs2696609	43795634	T	C	0.0130473	DBP	17:43795634:C:T	0.2386	CRHR1:RP11-105N13.4	00:00:00	ncRNA_intronic	0.281	7	5	14
rs11575895	20	17	44293205	rs2696609	43971785	0.953951	rs2696609	43971785	G	A	0.0127598	DBP	17:43971785:A:G	0.2396	MAPT-AS1:MAPT	00:00:00	ncRNA_intronic	16.48	2a	1	1
rs11575896	20	17	44293205	rs2696609	43972142	0.953951	rs2696609	43972142	A	G	0.0127512	DBP	17:43972142:A:G	0.2396	MAPT-AS1:MAPT	00:00:00	ncRNA_exonic	11.69	4	1	1
rs117365970	20	17	44293205	rs2696609	43893259	0.953951	rs2696609	43893259	A	G	0.0106418	DBP	17:43893259:A:G	0.2396	CRHR1:RP11-105N13.4	00:00:00	ncRNA_intronic	3.226	3a	5	14
rs117368197	20	17	44293205	rs2696609	43715924	0.953951	rs2696609	43715924	G	A	0.0137042	DBP	17:43715924:A:G	0.2396	CRHR1-IT1:CRHR1:RP11-105N13.4	00:00:00	ncRNA_intronic	8.738	6	4	5
rs117646503	20	17	44293205	rs2696609	43893260	0.953951	rs2696609	43893260	C	T	0.0106585	DBP	17:43893260:C:T	0.2396	CRHR1:RP11-105N13.4	00:00:00	ncRNA_intronic	5.739	3a	5	14
rs118087478	20	17	44293205	rs2696609	44051589	0.958962	rs2696609	44051589	G	T	0.0131459	DBP	17:44051589:G:T	0.2406	MAPT	0	UTR5	5.936	4	2	15
rs12149995	20	17	44293205	rs2696609	44092801	0.958962	rs2696609	44092801	A	G	0.0139832	DBP	17:44092801:A:G	0.2406	MAPT	0	intronic	8.566	6	5	15
rs12150064	20	17	44293205	rs2696609	44128407	0.958962	rs2696609	44128407	A	C	0.0133299	DBP	17:44128407:A:C	0.2406	KANSL1	0	intronic	1.908	1f	4	4
rs12150090	20	17	44293205	rs2696609	44115886	0.958962	rs2696609	44115886	T	C	0.0138055	DBP	17:44115886:C:T	0.2406	KANSL1	0	intronic	6.176	1f	4	4
rs12150091	20	17	44293205	rs2696609	43776242	0.953951	rs2696609	43776242	G	A	0.0137371	DBP	17:43776242:A:G	0.2396	CRHR1:RP11-105N13.4	00:00:00	ncRNA_intronic	0.074	7	9	14
rs12150104	20	17	44293205	rs2696609	44015929	0.953951	rs2696609	44015929	A	G	0.0118083	DBP	17:44015929:A:G	0.2396	MAPT	0	intronic	4.376	1f	5	14
rs12150111	20	17	44293205	rs2696609	44013938	0.953951	rs2696609	44013938	G	A	0.0108975	DBP	17:44013938:A:G	0.2396	MAPT	0	intronic	0.54	1f	2	14
rs12150125	20	17	44293205	rs2696609	43986432	0.953951	rs2696609	43986432	A	G	0.0124605	DBP	17:43986432:A:G	0.2396	MAPT:RP11-669E14.4	00:00:00	ncRNA_intronic	3.538	5	2	14
rs12150127	20	17	44293205	rs2696609	44141732	0.958962	rs2696609	44141732	A	G	0.0127501	DBP	17:44141732:A:G	0.2406	KANSL1	0	intronic	0.806	5	4	5
rs12150141	20	17	44293205	rs2696609	43775145	0.953951	rs2696609	43775145	A	G	0.0137371	DBP	17:43775145:A:G	0.2396	CRHR1:RP11-105N13.4	00:00:00	ncRNA_intronic	5.02	6	9	14
rs12150162	20	17	44293205	rs2696609	44114218	0.958962	rs2696609	44114218	C	T	0.0138026	DBP	17:44114218:C:T	0.2406	KANSL1	0	intronic	1.696	5	4	4
rs12150170	20	17	44293205	rs2696609	44090646	0.958962	rs2696609	44090646	G	A	0.0129949	DBP	17:44090646:A:G	0.2406	MAPT	0	intronic	5.654	1d	2	15
rs12150195	20	17	44293205	rs2696609	44014263	0.953951	rs2696609	44014263	C	T	0.0116698	DBP	17:44014263:C:T	0.2396	MAPT	0	intronic	1.538	1f	5	14
rs12150223	20	17	44293205	rs2696609	43944204	0.953951	rs2696609	43944204	C	T	0.0117891	DBP	17:43944204:C:T	0.2396	MAPT-AS1	0	ncRNA_intronic	0.801	6	5	14
rs12150229	20	17	44293205	rs2696609	44015446	0.953951	rs2696609	44015446	G	A	0.0117987	DBP	17:44015446:A:G	0.2396	MAPT	0	intronic	2.019	6	5	14
rs12150230	20	17	44293205	rs2696609	44015464	0.953951	rs2696609	44015464	G	A	0.0117987	DBP	17:44015464:A:G	0.2396	MAPT	0	intronic	2.931	6	5	14
rs12150235	20	17	44293205	rs2696609	44015745	0.953951	rs2696609	44015745	G	A	0.0117987	DBP	17:44015745:A:G	0.2396	MAPT	0	intronic	0.328	6	5	14
rs12150242	20	17	44293205	rs2696609	44015816	0.953951	rs2696609	44015816	G	A	0.0117987	DBP	17:44015816:A:G	0.2396	MAPT	0	intronic	2.681	1f	5	14
rs12150254	20	17	44293205	rs2696609	44090455	0.958962	rs2696609	44090455	C	T	0.0129949	DBP	17:44090455:C:T	0.2406	MAPT	0	intronic	4.815	NA	2	15
rs12150332	20	17	44293205	rs2696609	43824908	0.953951	rs2696609	43824908	T	C	0.0113378	DBP	17:43824908:C:T	0.2396	CRHR1:RP11-105N13.4	00:00:00	ncRNA_intronic	1.626	7	5	14
rs12150336	20	17	44293205	rs2696609	44125704	0.958962	rs2696609	44125704	T	C	0.0135338	DBP	17:44125704:C:T	0.2406	KANSL1	0	intronic	13.5	6	4	4
rs12150344	20	17	44293205	rs2696609	44143484	0.958962	rs2696609	44143484	A	G	0.0127501	DBP	17:44143484:A:G	0.2406	KANSL1	0	intronic	3.418	7	4	4
rs12150363	20	17	44293205	rs2696609	43826351	0.953951	rs2696609	43826351	G	A	0.0113978	DBP	17:43826351:A:G	0.2396	CRHR1:RP11-105N13.4	00:00:00	ncRNA_intronic	3.55	2c	5	14
rs12150390	20	17	44293205	rs2696609	43896228	0.953951	rs2696609	43896228	C	T	0.00995779	DBP	17:43896228:C:T	0.2396	CRHR1	0	intronic	17.47	5	5	15
rs12150438	20	17	44293205	rs2696609	44113963	0.958962	rs2696609	44113963	T	C	0.0138055	DBP	17:44113963:C:T	0.2406	KANSL1	0	intronic	4.433	5	4	4
rs12150447	20	17	44293205	rs2696609	44128125	0.958962	rs2696609	44128125	C	A	0.0133339	DBP	17:44128125:A:C	0.2406	KANSL1	0	intronic	5.23	1f	4	4
rs12150451	20	17	44293205	rs2696609	43827431	0.953951	rs2696609	43827431	G	A	0.0114551	DBP	17:43827431:A:G	0.2396	CRHR1:RP11-105N13.4	00:00:00	ncRNA_intronic	0.482	1f	5	14
rs12150454	20	17	44293205	rs2696609	43776061	0.953951	rs2696609	43776061	T	C	0.0137371	DBP	17:43776061:C:T	0.2396	CRHR1:RP11-105N13.4	00:00:00	ncRNA_intronic	0.551	6	9	14
rs12150455	20	17	44293205	rs2696609	43827508	0.953951	rs2696609	43827508	G	A	0.0114551	DBP	17:43827508:A:G	0.2396	CRHR1:RP11-105N13.4	00:00:00	ncRNA_intronic	3.287	1f	5	14
rs12150460	20	17	44293205	rs2696609	44014137	0.953951	rs2696609	44014137	T	G	0.0114927	DBP	17:44014137:G:T	0.2396	MAPT	0	intronic	1.684	1d	2	14
rs12150464	20	17	44293205	rs2696609	43776371	0.953951	rs2696609	43776371	T	C	0.0137371	DBP	17:43776371:C:T	0.2396	CRHR1:RP11-105N13.4	00:00:00	ncRNA_intronic	0.46	6	9	14
rs12150469	20	17	44293205	rs2696609	44092497	0.958962	rs2696609	44092497	C	T	0.0129949	DBP	17:44092497:C:T	0.2406	MAPT	0	intronic	4.992	7	5	15
rs12150515	20	17	44293205	rs2696609	44090685	0.958962	rs2696609	44090685	T	G	0.012997	DBP	17:44090685:G:T	0.2406	MAPT	0	intronic	5.603	1b	2	15
rs12150516	20	17	44293205	rs2696609	43944519	0.953951	rs2696609	43944519	T	C	0.0117154	DBP	17:43944519:C:T	0.2396	MAPT-AS1	0	ncRNA_intronic	1.306	6	5	14
rs12150527	20	17	44293205	rs2696609	43986462	0.953951	rs2696609	43986462	G	A	0.0123899	DBP	17:43986462:A:G	0.2396	MAPT:RP11-669E14.4	00:00:00	ncRNA_intronic	9.12	5	2	14
rs12150542	20	17	44293205	rs2696609	44115730	0.958962	rs2696609	44115730	A	G	0.0141136	DBP	17:44115730:A:G	0.2406	KANSL1	0	intronic	3.174	6	4	4
rs12150547	20	17	44293205	rs2696609	43775546	0.953951	rs2696609	43775546	G	A	0.0141103	DBP	17:43775546:A:G	0.2396	CRHR1:RP11-105N13.4	00:00:00	ncRNA_intronic	3.644	1f	9	14
rs12150551	20	17	44293205	rs2696609	44150920	0.958962	rs2696609	44150920	C	T	0.0127414	DBP	17:44150920:C:T	0.2406	KANSL1	0	intronic	2.691	7	2	5
rs12150558	20	17	44293205	rs2696609	44151156	0.958962	rs2696609	44151156	C	T	0.0127414	DBP	17:44151156:C:T	0.2406	KANSL1	0	intronic	6.856	5	2	5
rs12150570	20	17	44293205	rs2696609	44126218	0.958962	rs2696609	44126218	A	G	0.0133974	DBP	17:44126218:A:G	0.2406	KANSL1	0	intronic	5.064	6	4	4
rs12150576	20	17	44293205	rs2696609	44015624	0.953951	rs2696609	44015624	A	G	0.0115579	DBP	17:44015624:A:G	0.2396	MAPT	0	intronic	5.811	6	5	14
rs12150608	20	17	44293205	rs2696609	43775402	0.953951	rs2696609	43775402	C	T	0.0137371	DBP	17:43775402:C:T	0.2396	CRHR1:RP11-105N13.4	00:00:00	ncRNA_intronic	1.987	5	9	14
rs12150610	20	17	44293205	rs2696609	43775479	0.953951	rs2696609	43775479	C	T	0.0137371	DBP	17:43775479:C:T	0.2396	CRHR1:RP11-105N13.4	00:00:00	ncRNA_intronic	3.776	1f	9	14
rs12150611	20	17	44293205	rs2696609	44149741	0.958962	rs2696609	44149741	A	G	0.0127501	DBP	17:44149741:A:G	0.2406	KANSL1	0	intronic	0.055	7	4	5
rs12150621	20	17	44293205	rs2696609	43838482	0.953951	rs2696609	43838482	T	G	0.0128606	DBP	17:43838482:G:T	0.2396	CRHR1:RP11-105N13.4	00:00:00	ncRNA_intronic	1.795	6	5	14
rs12150628	20	17	44293205	rs2696609	44149581	0.958962	rs2696609	44149581	T	C	0.0127501	DBP	17:44149581:C:T	0.2406	KANSL1	0	intronic	8.472	7	2	5
rs12150658	20	17	44293205	rs2696609	43826305	0.953951	rs2696609	43826305	A	G	0.0113967	DBP	17:43826305:A:G	0.2396	CRHR1:RP11-105N13.4	00:00:00	ncRNA_intronic	4.801	1f	5	14
rs12150672	20	17	44293205	rs2696609	43826637	0.953951	rs2696609	43826637	A	G	0.0113967	DBP	17:43826637:A:G	0.2396	CRHR1:RP11-105N13.4	00:00:00	ncRNA_intronic	0.321	1d	5	14
rs12150683	20	17	44293205	rs2696609	43824848	0.953951	rs2696609	43824848	G	A	0.0113411	DBP	17:43824848:A:G	0.2396	CRHR1:RP11-105N13.4	00:00:00	ncRNA_intronic	12.82	6	5	14
rs12185225	20	17	44293205	rs2696609	44113491	0.958962	rs2696609	44113491	C	T	0.0137362	DBP	17:44113491:C:T	0.2406	KANSL1	0	intronic	5.417	7	4	4
rs12185235	20	17	44293205	rs2696609	43923703	0.953951	rs2696609	43923703	T	C	0.0129116	DBP	17:43923703:C:T	0.2396	MAPT-AS1:SPPL2C	00:00:00	exonic	5.04	1f	5	15
rs12185243	20	17	44293205	rs2696609	44115351	0.958962	rs2696609	44115351	C	T	0.0120134	DBP	17:44115351:C:T	0.2406	KANSL1	0	intronic	6.295	1f	4	4
rs12185268	20	17	44293205	rs2696609	43923683	0.953951	rs2696609	43923683	G	A	0.0135684	DBP	17:43923683:A:G	0.2396	MAPT-AS1:SPPL2C	00:00:00	exonic	8.654	1f	5	15
rs12373123	20	17	44293205	rs2696609	43924073	0.953951	rs2696609	43924073	C	T	0.0114086	DBP	17:43924073:C:T	0.2396	MAPT-AS1:SPPL2C	00:00:00	exonic	23.3	1f	5	15
rs12373124	20	17	44293205	rs2696609	43924219	0.953951	rs2696609	43924219	C	T	0.0111327	DBP	17:43924219:C:T	0.2396	MAPT-AS1:SPPL2C	00:00:00	exonic	0.387	NA	5	15
rs12373139	20	17	44293205	rs2696609	43924130	0.953951	rs2696609	43924130	A	G	0.00964236	DBP	17:43924130:A:G	0.2396	MAPT-AS1:SPPL2C	00:00:00	exonic	4.046	1f	5	15
rs12373140	20	17	44293205	rs2696609	43924231	0.953951	rs2696609	43924231	A	G	0.0111383	DBP	17:43924231:A:G	0.2396	MAPT-AS1:SPPL2C	00:00:00	exonic	12.99	5	5	15
rs12373168	20	17	44293205	rs2696609	43924337	0.938453	rs2696609	43924337	C	A	0.00624334	DBP	17:43924337:A:C	0.2425	MAPT-AS1:SPPL2C	00:00:00	ncRNA_intronic	6.155	1f	5	15
rs12449792	20	17	43302259	rs12449792	43302259	1	rs12449792	43302259	T	C	0.0102408	DBP	17:43302259:C:T	0.4195	FMNL1	0	intronic	11.71	4	1	2
rs12943085	20	17	44293205	rs2696609	43834482	0.953951	rs2696609	43834482	A	G	0.0120497	DBP	17:43834482:A:G	0.2396	CRHR1:RP11-105N13.4	00:00:00	ncRNA_intronic	11.98	5	5	14
rs12948216	20	17	44293205	rs2696609	43836673	0.953951	rs2696609	43836673	T	C	0.0128872	DBP	17:43836673:C:T	0.2396	CRHR1:RP11-105N13.4	00:00:00	ncRNA_intronic	0.014	6	5	14
rs1378358	20	17	44293205	rs2696609	44787312	0.850515	rs2696609	44787312	T	C	0.0384467	DBP	17:44787312:C:T	0.2247	NSF	0	intronic	2.785	NA	4	5
rs1396862	20	17	44293205	rs2696609	43902997	0.953951	rs2696609	43902997	A	G	0.0105538	DBP	17:43902997:A:G	0.2396	CRHR1	0	intronic	0.045	NA	5	14
rs1467962	20	17	44293205	rs2696609	43978604	0.953951	rs2696609	43978604	G	A	0.0121542	DBP	17:43978604:A:G	0.2396	MAPT	0	intronic	4.555	2b	5	14
rs1467963	20	17	44293205	rs2696609	43978934	0.953951	rs2696609	43978934	G	T	0.0121542	DBP	17:43978934:G:T	0.2396	MAPT	0	intronic	9.557	5	5	14
rs1467966	20	17	44293205	rs2696609	43984399	0.953951	rs2696609	43984399	T	C	0.0123922	DBP	17:43984399:C:T	0.2396	MAPT	0	intronic	3.864	5	2	14
rs1467968	20	17	44293205	rs2696609	43986396	0.953951	rs2696609	43986396	T	C	0.0125713	DBP	17:43986396:C:T	0.2396	MAPT:RP11-669E14.4	00:00:00	ncRNA_intronic	2.538	5	2	14
rs1467969	20	17	44293205	rs2696609	43998328	0.953951	rs2696609	43998328	T	C	0.0106526	DBP	17:43998328:C:T	0.2396	MAPT	0	intronic	0.98	6	4	15
rs1467970	20	17	44293205	rs2696609	43998574	0.953951	rs2696609	43998574	G	T	0.0114249	DBP	17:43998574:G:T	0.2396	MAPT	0	intronic	4.058	1f	4	15
rs1468241	20	17	44293205	rs2696609	44196153	0.958962	rs2696609	44196153	G	A	0.0116098	DBP	17:44196153:A:G	0.2406	KANSL1	0	intronic	2.301	NA	2	7
rs1476127	20	17	44293205	rs2696609	43999793	0.953951	rs2696609	43999793	A	G	0.0112132	DBP	17:43999793:A:G	0.2396	MAPT	0	intronic	4.444	5	4	14
rs1476554	20	17	44293205	rs2696609	44159102	0.958962	rs2696609	44159102	T	C	0.0126818	DBP	17:44159102:C:T	0.2406	KANSL1	0	intronic	1.332	NA	4	5
rs1526125	20	17	44293205	rs2696609	43812177	0.953951	rs2696609	43812177	T	C	0.0118274	DBP	17:43812177:C:T	0.2396	CRHR1:RP11-105N13.4	00:00:00	ncRNA_intronic	2.724	1b	5	14
rs1526126	20	17	44293205	rs2696609	43812218	0.953951	rs2696609	43812218	T	C	0.0118274	DBP	17:43812218:C:T	0.2396	CRHR1:RP11-105N13.4	00:00:00	ncRNA_intronic	8.475	1b	5	14
rs1526128	20	17	44293205	rs2696609	43779624	0.929377	rs2696609	43779624	T	C	0.0139919	DBP	17:43779624:C:T	0.2346	CRHR1:RP11-105N13.4	00:00:00	ncRNA_intronic	5.788	1f	5	14
rs1526129	20	17	44293205	rs2696609	43779657	0.953951	rs2696609	43779657	C	T	0.0143601	DBP	17:43779657:C:T	0.2396	CRHR1:RP11-105N13.4	00:00:00	ncRNA_intronic	5.58	1f	5	14
rs1560310	20	17	44293205	rs2696609	43978534	0.953951	rs2696609	43978534	A	G	0.0119381	DBP	17:43978534:A:G	0.2396	MAPT	0	intronic	0.562	1f	2	14
rs1560311	20	17	44293205	rs2696609	43978625	0.953951	rs2696609	43978625	C	T	0.0121542	DBP	17:43978625:C:T	0.2396	MAPT	0	intronic	0.849	4	5	14
rs1568949	20	17	44293205	rs2696609	43792975	0.948607	rs2696609	43792975	A	G	0.0123234	DBP	17:43792975:A:G	0.2406	CRHR1:RP11-105N13.4	00:00:00	ncRNA_intronic	9.597	NA	5	14
rs1568950	20	17	44293205	rs2696609	43792896	0.953951	rs2696609	43792896	C	T	0.0121299	DBP	17:43792896:C:T	0.2396	CRHR1:RP11-105N13.4	00:00:00	ncRNA_intronic	0.736	NA	5	14
rs1568951	20	17	44293205	rs2696609	43792895	0.953951	rs2696609	43792895	G	T	0.0121299	DBP	17:43792895:G:T	0.2396	CRHR1:RP11-105N13.4	00:00:00	ncRNA_intronic	3.678	NA	5	14
rs1608955	20	17	44293205	rs2696609	43815713	0.953951	rs2696609	43815713	T	C	0.0118274	DBP	17:43815713:C:T	0.2396	CRHR1:RP11-105N13.4	00:00:00	ncRNA_intronic	1.827	7	5	14
rs1630095	20	17	44293205	rs2696609	43750172	0.836946	rs2696609	43750172	G	A	0.0170059	DBP	17:43750172:A:G	0.2664	CRHR1:RP11-105N13.4	00:00:00	ncRNA_intronic	0.299	NA	5	14
rs1631850	20	17	44293205	rs2696609	43749942	0.836946	rs2696609	43749942	A	G	0.0172888	DBP	17:43749942:A:G	0.2664	CRHR1:RP11-105N13.4	00:00:00	ncRNA_intronic	4.924	NA	5	14
rs1635288	20	17	44293205	rs2696609	43756969	0.841337	rs2696609	43756969	A	G	0.0161737	DBP	17:43756969:A:G	0.2654	CRHR1:RP11-105N13.4	00:00:00	ncRNA_intronic	7.732	NA	5	14
rs1635291	20	17	44293205	rs2696609	43751913	0.836946	rs2696609	43751913	G	A	0.0159682	DBP	17:43751913:A:G	0.2664	CRHR1:RP11-105N13.4	00:00:00	ncRNA_intronic	4.098	NA	5	14
rs169201	20	17	44293205	rs2696609	44790203	0.850515	rs2696609	44790203	G	A	0.0365949	DBP	17:44790203:A:G	0.2247	NSF	0	intronic	10.01	6	4	5
rs16940633	20	17	44293205	rs2696609	43710371	0.953951	rs2696609	43710371	A	G	0.0140844	DBP	17:43710371:A:G	0.2396	CRHR1-IT1:CRHR1:RP11-105N13.4	00:00:00	ncRNA_intronic	3.408	5	4	5
rs16940665	20	17	44293205	rs2696609	43907896	0.953951	rs2696609	43907896	C	T	0.0107489	DBP	17:43907896:C:T	0.2396	CRHR1	0	exonic	10.05	1f	5	15
rs16940668	20	17	44293205	rs2696609	43907966	0.953951	rs2696609	43907966	A	G	0.0109241	DBP	17:43907966:A:G	0.2396	CRHR1	0	intronic	1.686	5	5	15
rs16940671	20	17	44293205	rs2696609	43908151	0.953951	rs2696609	43908151	T	C	0.0109241	DBP	17:43908151:C:T	0.2396	CRHR1	0	intronic	6.787	5	5	15
rs16940672	20	17	44293205	rs2696609	43908152	0.953951	rs2696609	43908152	T	C	0.0109241	DBP	17:43908152:C:T	0.2396	CRHR1	0	intronic	0.756	5	5	15
rs16940674	20	17	44293205	rs2696609	43910507	0.953951	rs2696609	43910507	T	C	0.0105756	DBP	17:43910507:C:T	0.2396	CRHR1	0	exonic	17.55	1f	5	15
rs16940676	20	17	44293205	rs2696609	43911036	0.948973	rs2696609	43911036	A	G	0.00980491	DBP	17:43911036:A:G	0.2386	CRHR1	0	intronic	0.531	5	5	15
rs16940677	20	17	44293205	rs2696609	43911898	0.953951	rs2696609	43911898	T	C	0.00964236	DBP	17:43911898:C:T	0.2396	CRHR1	0	intronic	0.987	1f	5	15
rs16940799	20	17	44293205	rs2696609	44102933	0.958962	rs2696609	44102933	C	T	0.0130023	DBP	17:44102933:C:T	0.2406	MAPT	0	UTR3	0.676	1f	4	5
rs16940806	20	17	44293205	rs2696609	44103826	0.958962	rs2696609	44103826	A	G	0.0131593	DBP	17:44103826:A:G	0.2406	MAPT	0	UTR3	3.569	4	4	4
rs16940904	20	17	44293205	rs2696609	44186063	0.98964	rs2696609	44186063	T	C	0.00505725	DBP	17:44186063:C:T	0.2465	KANSL1	0	intronic	1.32	4	2	7
rs16941035	20	17	44293205	rs2696609	43761519	0.841337	rs2696609	43761519	G	T	0.019344	DBP	17:43761519:G:T	0.2654	CRHR1:RP11-105N13.4	00:00:00	ncRNA_intronic	1.487	1f	5	14
rs16941038	20	17	44293205	rs2696609	43761565	0.841337	rs2696609	43761565	C	T	0.019344	DBP	17:43761565:C:T	0.2654	CRHR1:RP11-105N13.4	00:00:00	ncRNA_intronic	8.044	1f	5	14
rs1706746	20	17	44293205	rs2696609	43721457	0.953951	rs2696609	43721457	T	C	0.0136028	DBP	17:43721457:C:T	0.2396	CRHR1-IT1:CRHR1:RP11-105N13.4	00:00:00	ncRNA_intronic	0.501	6	5	15
rs1724400	20	17	44293205	rs2696609	43755871	0.836946	rs2696609	43755871	A	C	0.0156659	DBP	17:43755871:A:C	0.2664	CRHR1:RP11-105N13.4	00:00:00	ncRNA_intronic	3.23	6	5	14
rs1724401	20	17	44293205	rs2696609	43755857	0.836946	rs2696609	43755857	C	A	0.0160491	DBP	17:43755857:A:C	0.2664	CRHR1:RP11-105N13.4	00:00:00	ncRNA_intronic	0.981	NA	5	14
rs1724407	20	17	44293205	rs2696609	43747615	0.836946	rs2696609	43747615	C	T	0.0174186	DBP	17:43747615:C:T	0.2664	CRHR1:RP11-105N13.4	00:00:00	ncRNA_intronic	6.937	NA	5	14
rs1724409	20	17	44293205	rs2696609	43740565	0.797993	rs2696609	43740565	G	T	0.00938707	DBP	17:43740565:G:T	0.2763	CRHR1:RP11-105N13.4	00:00:00	ncRNA_intronic	7.098	NA	5	14
rs17334797	20	17	44293205	rs2696609	43825912	0.953951	rs2696609	43825912	G	A	0.0111349	DBP	17:43825912:A:G	0.2396	CRHR1:RP11-105N13.4	00:00:00	ncRNA_intronic	1.619	1f	5	14
rs17334894	20	17	44293205	rs2696609	43827209	0.953951	rs2696609	43827209	A	G	0.0106729	DBP	17:43827209:A:G	0.2396	CRHR1:RP11-105N13.4	00:00:00	ncRNA_intronic	1.03	1f	5	14
rs17334923	20	17	44293205	rs2696609	43827244	0.953951	rs2696609	43827244	T	C	0.0124526	DBP	17:43827244:C:T	0.2396	CRHR1:RP11-105N13.4	00:00:00	ncRNA_intronic	10.74	5	5	14
rs17334944	20	17	44293205	rs2696609	43828617	0.948737	rs2696609	43828617	A	G	0.014067	DBP	17:43828617:A:G	0.2406	CRHR1:RP11-105N13.4	00:00:00	ncRNA_intronic	0.13	1f	5	14
rs17425752	20	17	44293205	rs2696609	43906726	0.948973	rs2696609	43906726	C	A	0.0127867	DBP	17:43906726:A:C	0.2386	CRHR1	0	intronic	2.573	5	5	15
rs17426064	20	17	44293205	rs2696609	43828698	0.953951	rs2696609	43828698	T	C	0.0111596	DBP	17:43828698:C:T	0.2396	CRHR1:RP11-105N13.4	00:00:00	ncRNA_intronic	0.415	6	5	14
rs17426195	20	17	44293205	rs2696609	43832367	0.953951	rs2696609	43832367	A	G	0.0101032	DBP	17:43832367:A:G	0.2396	CRHR1:RP11-105N13.4	00:00:00	ncRNA_intronic	0.732	6	5	14
rs17563433	20	17	44293205	rs2696609	43800351	0.953951	rs2696609	43800351	C	A	0.0122632	DBP	17:43800351:A:C	0.2396	CRHR1:RP11-105N13.4	00:00:00	ncRNA_intronic	1.317	1f	13	14
rs17563501	20	17	44293205	rs2696609	43801695	0.953951	rs2696609	43801695	T	C	0.0119829	DBP	17:43801695:C:T	0.2396	CRHR1:RP11-105N13.4	00:00:00	ncRNA_intronic	0.634	6	9	14
rs17563599	20	17	44293205	rs2696609	43807955	0.953951	rs2696609	43807955	C	A	0.0118262	DBP	17:43807955:A:C	0.2396	CRHR1:RP11-105N13.4	00:00:00	ncRNA_intronic	2.221	6	9	9
rs17563683	20	17	44293205	rs2696609	43811072	0.953951	rs2696609	43811072	G	A	0.0118262	DBP	17:43811072:A:G	0.2396	CRHR1:RP11-105N13.4:RP11-293E1.1	00:00:00	ncRNA_intronic	5.696	6	5	14
rs17563718	20	17	44293205	rs2696609	43811673	0.953951	rs2696609	43811673	T	C	0.0118274	DBP	17:43811673:C:T	0.2396	CRHR1:RP11-105N13.4:RP11-293E1.1	00:00:00	ncRNA_exonic	4.554	6	5	14
rs17563800	20	17	44293205	rs2696609	43817459	0.953951	rs2696609	43817459	T	C	0.0119641	DBP	17:43817459:C:T	0.2396	CRHR1:RP11-105N13.4	00:00:00	ncRNA_intronic	8.442	1b	5	14
rs17563827	20	17	44293205	rs2696609	43818222	0.953951	rs2696609	43818222	A	C	0.0115142	DBP	17:43818222:A:C	0.2396	CRHR1:RP11-105N13.4	00:00:00	ncRNA_intronic	3.106	1f	1	14
rs17563861	20	17	44293205	rs2696609	43818906	0.953951	rs2696609	43818906	G	A	0.0114745	DBP	17:43818906:A:G	0.2396	CRHR1:RP11-105N13.4	00:00:00	ncRNA_intronic	3.007	6	5	14
rs17563923	20	17	44293205	rs2696609	43819450	0.953951	rs2696609	43819450	A	G	0.0115142	DBP	17:43819450:A:G	0.2396	CRHR1:RP11-105N13.4	00:00:00	ncRNA_intronic	0.024	1f	5	14
rs17563965	20	17	44293205	rs2696609	43990919	0.953951	rs2696609	43990919	G	A	0.0124571	DBP	17:43990919:A:G	0.2396	MAPT	0	intronic	4.407	1f	4	14
rs17563986	20	17	44293205	rs2696609	43991272	0.953951	rs2696609	43991272	G	A	0.0118131	DBP	17:43991272:A:G	0.2396	MAPT	0	intronic	1.378	1f	4	14
rs17564020	20	17	44293205	rs2696609	43991781	0.953951	rs2696609	43991781	T	G	0.0122129	DBP	17:43991781:G:T	0.2396	MAPT	0	intronic	6.387	1b	2	14
rs17564153	20	17	44293205	rs2696609	43995098	0.953951	rs2696609	43995098	A	G	0.0114173	DBP	17:43995098:A:G	0.2396	MAPT	0	intronic	0.591	6	4	14
rs17564223	20	17	44293205	rs2696609	43997520	0.948607	rs2696609	43997520	T	C	0.014133	DBP	17:43997520:C:T	0.2406	MAPT	0	intronic	5.256	1f	2	14
rs17564493	20	17	44293205	rs2696609	44001379	0.953951	rs2696609	44001379	T	C	0.011154	DBP	17:44001379:C:T	0.2396	MAPT	0	intronic	8.427	1f	2	14
rs17564591	20	17	44293205	rs2696609	44002062	0.953951	rs2696609	44002062	C	A	0.0111484	DBP	17:44002062:A:C	0.2396	MAPT	0	intronic	0.792	5	2	15
rs17564619	20	17	44293205	rs2696609	44002138	0.953951	rs2696609	44002138	G	A	0.0116014	DBP	17:44002138:A:G	0.2396	MAPT	0	intronic	1.304	1f	2	15
rs17564703	20	17	44293205	rs2696609	44002595	0.953951	rs2696609	44002595	T	C	0.0122151	DBP	17:44002595:C:T	0.2396	MAPT	0	intronic	0.162	5	5	15
rs17564780	20	17	44293205	rs2696609	44005413	0.948737	rs2696609	44005413	G	A	0.0130452	DBP	17:44005413:A:G	0.2406	MAPT	0	intronic	1.552	NA	5	9
rs17564829	20	17	44293205	rs2696609	44006601	0.953951	rs2696609	44006601	C	T	0.0114346	DBP	17:44006601:C:T	0.2396	MAPT	0	intronic	5.304	7	5	14
rs17564871	20	17	44293205	rs2696609	44011018	0.953951	rs2696609	44011018	G	A	0.0113082	DBP	17:44011018:A:G	0.2396	MAPT	0	intronic	6.615	6	1	14
rs17564948	20	17	44293205	rs2696609	44011749	0.953951	rs2696609	44011749	G	A	0.0113717	DBP	17:44011749:A:G	0.2396	MAPT	0	intronic	1.631	1f	1	14
rs17564983	20	17	44293205	rs2696609	44011825	0.953951	rs2696609	44011825	C	A	0.0113717	DBP	17:44011825:A:C	0.2396	MAPT	0	intronic	0.298	6	1	14
rs17565025	20	17	44293205	rs2696609	44012463	0.948607	rs2696609	44012463	C	T	0.0100632	DBP	17:44012463:C:T	0.2406	MAPT	0	intronic	5.491	6	1	14
rs17571718	20	17	44293205	rs2696609	44032768	0.953951	rs2696609	44032768	C	T	0.0111371	DBP	17:44032768:C:T	0.2396	MAPT	0	intronic	10.31	1f	5	14
rs17571739	20	17	44293205	rs2696609	44032915	0.953951	rs2696609	44032915	C	T	0.0110785	DBP	17:44032915:C:T	0.2396	MAPT	0	intronic	4.096	NA	5	14
rs17571781	20	17	44293205	rs2696609	44033802	0.953951	rs2696609	44033802	C	T	0.0121669	DBP	17:44033802:C:T	0.2396	MAPT	0	intronic	1.62	1d	5	14
rs17571809	20	17	44293205	rs2696609	44034859	0.953951	rs2696609	44034859	G	A	0.0123731	DBP	17:44034859:A:G	0.2396	MAPT	0	intronic	7.235	1f	5	14
rs17571857	20	17	44293205	rs2696609	44035706	0.953951	rs2696609	44035706	G	A	0.0112873	DBP	17:44035706:A:G	0.2396	MAPT	0	intronic	10.51	1f	5	14
rs17572147	20	17	44293205	rs2696609	44044985	0.958962	rs2696609	44044985	G	A	0.0130065	DBP	17:44044985:A:G	0.2406	MAPT	0	intronic	0.292	1f	2	15
rs17572169	20	17	44293205	rs2696609	44045974	0.958962	rs2696609	44045974	T	C	0.0129539	DBP	17:44045974:C:T	0.2406	MAPT	0	intronic	8.627	1f	4	14
rs17572248	20	17	44293205	rs2696609	44049867	0.958962	rs2696609	44049867	G	A	0.0133339	DBP	17:44049867:A:G	0.2406	MAPT	0	intronic	10.55	1f	4	15
rs17572361	20	17	44293205	rs2696609	44052009	0.958962	rs2696609	44052009	C	T	0.0142071	DBP	17:44052009:C:T	0.2406	MAPT	0	UTR5	5.87	1f	3	15
rs17572467	20	17	44293205	rs2696609	44054388	0.958962	rs2696609	44054388	C	T	0.0132128	DBP	17:44054388:C:T	0.2406	MAPT	0	UTR5	0.949	1f	2	15
rs17572495	20	17	44293205	rs2696609	44054596	0.958962	rs2696609	44054596	G	T	0.0132128	DBP	17:44054596:G:T	0.2406	MAPT	0	UTR5	2.914	1a	2	15
rs17572613	20	17	44293205	rs2696609	44058004	0.958962	rs2696609	44058004	G	A	0.0134654	DBP	17:44058004:A:G	0.2406	MAPT	0	intronic	3.211	NA	4	15
rs17573245	20	17	44293205	rs2696609	44072854	0.953624	rs2696609	44072854	C	T	0.0116498	DBP	17:44072854:C:T	0.2416	MAPT	0	intronic	4.937	5	4	15
rs17573447	20	17	44293205	rs2696609	44079567	0.948456	rs2696609	44079567	T	C	0.0157952	DBP	17:44079567:C:T	0.2425	MAPT	0	intronic	1.72	4	4	15
rs17573509	20	17	44293205	rs2696609	44081224	0.958962	rs2696609	44081224	A	G	0.0126152	DBP	17:44081224:A:G	0.2406	MAPT	0	intronic	4.021	5	2	15
rs17573593	20	17	44293205	rs2696609	44082603	0.958962	rs2696609	44082603	C	A	0.0126753	DBP	17:44082603:A:C	0.2406	MAPT	0	intronic	0.541	1f	4	15
rs17573607	20	17	44293205	rs2696609	44083081	0.953951	rs2696609	44083081	A	G	0.0116936	DBP	17:44083081:A:G	0.2396	MAPT	0	intronic	2.458	6	4	15
rs17573858	20	17	44293205	rs2696609	44090796	0.958962	rs2696609	44090796	C	T	0.0129949	DBP	17:44090796:C:T	0.2406	MAPT	0	intronic	6.563	1f	2	15
rs17573907	20	17	44293205	rs2696609	44099082	0.958962	rs2696609	44099082	T	C	0.0131593	DBP	17:44099082:C:T	0.2406	MAPT	0	intronic	0.728	7	4	5
rs17574040	20	17	44293205	rs2696609	44102865	0.958962	rs2696609	44102865	C	A	0.0131645	DBP	17:44102865:A:C	0.2406	MAPT	0	UTR3	7.102	1f	4	5
rs17574228	20	17	44293205	rs2696609	44104509	0.958962	rs2696609	44104509	C	T	0.0135022	DBP	17:44104509:C:T	0.2406	MAPT	0	UTR3	1.197	1f	4	4
rs17574361	20	17	44293205	rs2696609	44108202	0.958962	rs2696609	44108202	G	A	0.0128914	DBP	17:44108202:A:G	0.2406	KANSL1	0	UTR3	10.44	1f	3	4
rs17574604	20	17	44293205	rs2696609	44111613	0.958962	rs2696609	44111613	G	A	0.0138026	DBP	17:44111613:A:G	0.2406	KANSL1	0	exonic	10.24	6	4	4
rs17574796	20	17	44293205	rs2696609	44115074	0.958962	rs2696609	44115074	C	T	0.0140334	DBP	17:44115074:C:T	0.2406	KANSL1	0	intronic	3.037	1f	4	4
rs17574824	20	17	44293205	rs2696609	44115107	0.958962	rs2696609	44115107	T	C	0.0139558	DBP	17:44115107:C:T	0.2406	KANSL1	0	intronic	0.21	1f	4	4
rs17575423	20	17	44293205	rs2696609	44129253	0.958962	rs2696609	44129253	C	T	0.0133339	DBP	17:44129253:C:T	0.2406	KANSL1	0	intronic	6.932	1f	4	5
rs17575507	20	17	44293205	rs2696609	44134095	0.958962	rs2696609	44134095	G	A	0.0133339	DBP	17:44134095:A:G	0.2406	KANSL1	0	intronic	1.072	1f	2	5
rs17575556	20	17	44293205	rs2696609	44135827	0.953624	rs2696609	44135827	A	G	0.0146921	DBP	17:44135827:A:G	0.2416	KANSL1	0	intronic	10.65	1f	4	5
rs17575683	20	17	44293205	rs2696609	44139662	0.958962	rs2696609	44139662	T	C	0.0127501	DBP	17:44139662:C:T	0.2406	KANSL1	0	intronic	9.205	NA	4	5
rs17575773	20	17	44293205	rs2696609	44142879	0.958962	rs2696609	44142879	T	C	0.0127501	DBP	17:44142879:C:T	0.2406	KANSL1	0	intronic	0.49	6	4	4
rs17575822	20	17	44293205	rs2696609	44144345	0.958962	rs2696609	44144345	G	A	0.0127414	DBP	17:44144345:A:G	0.2406	KANSL1	0	intronic	10.4	6	3	4
rs17575850	20	17	44293205	rs2696609	44144387	0.958962	rs2696609	44144387	A	C	0.0123415	DBP	17:44144387:A:C	0.2406	KANSL1	0	intronic	2.304	6	3	4
rs17576165	20	17	44293205	rs2696609	44159849	0.958962	rs2696609	44159849	C	T	0.0127414	DBP	17:44159849:C:T	0.2406	KANSL1	0	exonic	10.66	5	3	5
rs17576200	20	17	44293205	rs2696609	44159988	0.958962	rs2696609	44159988	A	G	0.0126818	DBP	17:44159988:A:G	0.2406	KANSL1	0	intronic	4.824	5	3	5
rs17576779	20	17	44293205	rs2696609	44178272	0.958962	rs2696609	44178272	T	C	0.0120963	DBP	17:44178272:C:T	0.2406	KANSL1	0	intronic	0.184	1f	2	7
rs17576842	20	17	44293205	rs2696609	44179992	0.958962	rs2696609	44179992	G	A	0.0121079	DBP	17:44179992:A:G	0.2406	KANSL1	0	intronic	5.007	1f	2	5
rs17576870	20	17	44293205	rs2696609	44180442	0.958962	rs2696609	44180442	G	A	0.0121079	DBP	17:44180442:A:G	0.2406	KANSL1	0	intronic	5.565	1f	5	5
rs17576954	20	17	44293205	rs2696609	44181933	0.953951	rs2696609	44181933	C	T	0.0142007	DBP	17:44181933:C:T	0.2396	KANSL1	0	intronic	5.707	1f	5	5
rs17576989	20	17	44293205	rs2696609	44183616	0.958962	rs2696609	44183616	A	C	0.0120287	DBP	17:44183616:A:C	0.2406	KANSL1	0	intronic	5.22	1f	4	5
rs17577024	20	17	44293205	rs2696609	44186252	0.958962	rs2696609	44186252	A	G	0.0114874	DBP	17:44186252:A:G	0.2406	KANSL1	0	intronic	0.856	1f	2	7
rs17577052	20	17	44293205	rs2696609	44186301	0.958962	rs2696609	44186301	C	T	0.0114949	DBP	17:44186301:C:T	0.2406	KANSL1	0	intronic	8.007	1b	2	7
rs17577094	20	17	44293205	rs2696609	44187492	0.958962	rs2696609	44187492	G	A	0.0156287	DBP	17:44187492:A:G	0.2406	KANSL1	0	intronic	4.008	1f	4	7
rs17577159	20	17	44293205	rs2696609	44188477	0.958962	rs2696609	44188477	G	T	0.0114949	DBP	17:44188477:G:T	0.2406	KANSL1	0	intronic	4.113	1f	5	5
rs17577313	20	17	44293205	rs2696609	44191835	0.958962	rs2696609	44191835	G	A	0.0115526	DBP	17:44191835:A:G	0.2406	KANSL1	0	intronic	0.461	1f	5	5
rs17577369	20	17	44293205	rs2696609	44192923	0.958962	rs2696609	44192923	G	A	0.0118011	DBP	17:44192923:A:G	0.2406	KANSL1	0	intronic	7.431	6	2	5
rs17577496	20	17	44293205	rs2696609	44194835	0.958962	rs2696609	44194835	C	T	0.0116098	DBP	17:44194835:C:T	0.2406	KANSL1	0	intronic	1.678	1f	2	5
rs17577650	20	17	44293205	rs2696609	44205500	0.958962	rs2696609	44205500	G	A	0.00915319	DBP	17:44205500:A:G	0.2406	KANSL1	0	intronic	2.189	1f	2	5
rs17577877	20	17	44293205	rs2696609	44208218	0.953951	rs2696609	44208218	G	A	0.00947207	DBP	17:44208218:A:G	0.2396	KANSL1	0	intronic	8.337	1f	2	7
rs17577954	20	17	44293205	rs2696609	44209628	0.958962	rs2696609	44209628	C	T	0.0117987	DBP	17:44209628:C:T	0.2406	KANSL1	0	intronic	2.336	6	4	5
rs17577975	20	17	44293205	rs2696609	44210442	0.953951	rs2696609	44210442	T	C	0.0111034	DBP	17:44210442:C:T	0.2396	KANSL1	0	intronic	8.171	1f	4	5
rs17649019	20	17	44293205	rs2696609	43801593	0.953951	rs2696609	43801593	A	G	0.0124348	DBP	17:43801593:A:G	0.2396	CRHR1:RP11-105N13.4	00:00:00	ncRNA_intronic	0.383	6	9	14
rs17649138	20	17	44293205	rs2696609	43808067	0.953951	rs2696609	43808067	A	G	0.0118274	DBP	17:43808067:A:G	0.2396	CRHR1:RP11-105N13.4	00:00:00	ncRNA_intronic	10.02	6	9	9
rs17649518	20	17	44293205	rs2696609	43994386	0.953951	rs2696609	43994386	A	C	0.0114713	DBP	17:43994386:A:C	0.2396	MAPT	0	intronic	3.773	1f	4	15
rs17649553	20	17	44293205	rs2696609	43994648	0.948607	rs2696609	43994648	T	C	0.0119144	DBP	17:43994648:C:T	0.2406	MAPT	0	intronic	0.289	NA	4	14
rs17649571	20	17	44293205	rs2696609	43994952	0.953951	rs2696609	43994952	G	A	0.011413	DBP	17:43994952:A:G	0.2396	MAPT	0	intronic	5.951	1f	4	14
rs17649635	20	17	44293205	rs2696609	43995990	0.953951	rs2696609	43995990	G	A	0.0117093	DBP	17:43995990:A:G	0.2396	MAPT	0	intronic	1.403	5	4	14
rs17649641	20	17	44293205	rs2696609	43997372	0.953951	rs2696609	43997372	C	T	0.0106562	DBP	17:43997372:C:T	0.2396	MAPT	0	intronic	7.818	1f	2	14
rs17649866	20	17	44293205	rs2696609	44000914	0.953951	rs2696609	44000914	C	T	0.0111484	DBP	17:44000914:C:T	0.2396	MAPT	0	intronic	1.34	1f	2	14
rs17649918	20	17	44293205	rs2696609	44001621	0.953951	rs2696609	44001621	G	A	0.0111484	DBP	17:44001621:A:G	0.2396	MAPT	0	intronic	8.304	1f	2	15
rs17649954	20	17	44293205	rs2696609	44001661	0.953951	rs2696609	44001661	G	A	0.0111484	DBP	17:44001661:A:G	0.2396	MAPT	0	intronic	4.535	1f	2	15
rs17650063	20	17	44293205	rs2696609	44002555	0.953951	rs2696609	44002555	G	A	0.0103137	DBP	17:44002555:A:G	0.2396	MAPT	0	intronic	0.975	1f	5	15
rs17650258	20	17	44293205	rs2696609	44011073	0.953951	rs2696609	44011073	A	G	0.0113159	DBP	17:44011073:A:G	0.2396	MAPT	0	intronic	1.717	5	1	14
rs17650335	20	17	44293205	rs2696609	44012343	0.953951	rs2696609	44012343	A	G	0.0114335	DBP	17:44012343:A:G	0.2396	MAPT	0	intronic	4.437	6	2	14
rs17650381	20	17	44293205	rs2696609	44013024	0.953951	rs2696609	44013024	C	T	0.0129402	DBP	17:44013024:C:T	0.2396	MAPT	0	intronic	9.758	6	1	14
rs17650417	20	17	44293205	rs2696609	44013103	0.953951	rs2696609	44013103	T	G	0.0114335	DBP	17:44013103:G:T	0.2396	MAPT	0	intronic	6.738	1f	1	14
rs17650579	20	17	44293205	rs2696609	44030115	0.953951	rs2696609	44030115	T	C	0.0120088	DBP	17:44030115:C:T	0.2396	MAPT	0	intronic	2.106	6	5	14
rs17650633	20	17	44293205	rs2696609	44030231	0.953951	rs2696609	44030231	C	T	0.0120088	DBP	17:44030231:C:T	0.2396	MAPT	0	intronic	4.118	6	5	14
rs17650651	20	17	44293205	rs2696609	44030311	0.953951	rs2696609	44030311	G	T	0.0120088	DBP	17:44030311:G:T	0.2396	MAPT	0	intronic	0.182	6	5	14
rs17650771	20	17	44293205	rs2696609	44035367	0.953951	rs2696609	44035367	G	A	0.0125049	DBP	17:44035367:A:G	0.2396	MAPT	0	intronic	6.031	1f	5	14
rs17650818	20	17	44293205	rs2696609	44036787	0.953951	rs2696609	44036787	C	T	0.0127759	DBP	17:44036787:C:T	0.2396	MAPT	0	intronic	3.878	1f	5	14
rs17650842	20	17	44293205	rs2696609	44037491	0.953951	rs2696609	44037491	G	A	0.0129402	DBP	17:44037491:A:G	0.2396	MAPT	0	intronic	2.766	6	5	14
rs17650860	20	17	44293205	rs2696609	44039008	0.958962	rs2696609	44039008	A	G	0.0115611	DBP	17:44039008:A:G	0.2406	MAPT	0	intronic	1.42	1f	5	14
rs17650872	20	17	44293205	rs2696609	44039516	0.958962	rs2696609	44039516	T	G	0.0130838	DBP	17:44039516:G:T	0.2406	MAPT	0	intronic	0.061	1f	4	14
rs17650901	20	17	44293205	rs2696609	44039691	0.958962	rs2696609	44039691	G	A	0.0127414	DBP	17:44039691:A:G	0.2406	MAPT	0	UTR5	9.079	1f	4	14
rs17650991	20	17	44293205	rs2696609	44044508	0.958962	rs2696609	44044508	C	A	0.0130065	DBP	17:44044508:A:C	0.2406	MAPT	0	intronic	0.907	1f	5	14
rs17651093	20	17	44293205	rs2696609	44049550	0.958962	rs2696609	44049550	A	G	0.0136926	DBP	17:44049550:A:G	0.2406	MAPT	0	intronic	1.193	1f	4	15
rs17651134	20	17	44293205	rs2696609	44050340	0.958962	rs2696609	44050340	A	G	0.0138275	DBP	17:44050340:A:G	0.2406	MAPT	0	UTR5	4.213	1f	4	15
rs17651213	20	17	44293205	rs2696609	44051924	0.958962	rs2696609	44051924	A	G	0.0140268	DBP	17:44051924:A:G	0.2406	MAPT	0	UTR5	3.224	1f	3	15
rs17651243	20	17	44293205	rs2696609	44052284	0.958962	rs2696609	44052284	A	G	0.0133299	DBP	17:44052284:A:G	0.2406	MAPT	0	UTR5	0.92	1f	2	15
rs17651285	20	17	44293205	rs2696609	44054237	0.958962	rs2696609	44054237	A	G	0.0133299	DBP	17:44054237:A:G	0.2406	MAPT	0	UTR5	0.752	1f	2	15
rs17651483	20	17	44293205	rs2696609	44058861	0.958962	rs2696609	44058861	A	C	0.0132005	DBP	17:44058861:A:C	0.2406	MAPT	0	intronic	2.179	1f	4	15
rs17651549	20	17	44293205	rs2696609	44061278	0.958962	rs2696609	44061278	T	C	0.0140137	DBP	17:44061278:C:T	0.2406	MAPT	0	exonic	26.8	1f	4	15
rs17651754	20	17	44293205	rs2696609	44067546	0.958962	rs2696609	44067546	C	T	0.0131273	DBP	17:44067546:C:T	0.2406	MAPT	0	intronic	5.747	1f	4	15
rs17651857	20	17	44293205	rs2696609	44069687	0.958962	rs2696609	44069687	G	A	0.0131273	DBP	17:44069687:A:G	0.2406	MAPT	0	intronic	5.666	4	4	15
rs17651887	20	17	44293205	rs2696609	44069840	0.958962	rs2696609	44069840	A	G	0.0132944	DBP	17:44069840:A:G	0.2406	MAPT	0	intronic	6.283	4	4	15
rs17652036	20	17	44293205	rs2696609	44073027	0.958962	rs2696609	44073027	A	G	0.013091	DBP	17:44073027:A:G	0.2406	MAPT	0	intronic	5.071	1f	4	15
rs17652121	20	17	44293205	rs2696609	44073973	0.958962	rs2696609	44073973	C	T	0.0131273	DBP	17:44073973:C:T	0.2406	MAPT	0	exonic	19.13	1f	4	15
rs17652337	20	17	44293205	rs2696609	44083323	0.943195	rs2696609	44083323	T	C	0.0114368	DBP	17:44083323:C:T	0.2416	MAPT	0	intronic	7.67	6	4	15
rs17652502	20	17	44293205	rs2696609	44094471	0.953624	rs2696609	44094471	A	G	0.0138865	DBP	17:44094471:A:G	0.2416	MAPT	0	intronic	2.348	1f	5	15
rs17652520	20	17	44293205	rs2696609	44098967	0.943058	rs2696609	44098967	A	G	0.0164092	DBP	17:44098967:A:G	0.2435	MAPT	0	intronic	0.283	7	4	5
rs17652748	20	17	44293205	rs2696609	44103616	0.958962	rs2696609	44103616	T	C	0.0131593	DBP	17:44103616:C:T	0.2406	MAPT	0	UTR3	1.614	1f	4	4
rs17652961	20	17	44293205	rs2696609	44108355	0.958962	rs2696609	44108355	A	G	0.0128872	DBP	17:44108355:A:G	0.2406	KANSL1	0	UTR3	3.68	1f	3	4
rs17653162	20	17	44293205	rs2696609	44111827	0.958962	rs2696609	44111827	A	C	0.0134054	DBP	17:44111827:A:C	0.2406	KANSL1	0	intronic	4.34	6	4	4
rs17653193	20	17	44293205	rs2696609	44112441	0.958962	rs2696609	44112441	A	G	0.0135408	DBP	17:44112441:A:G	0.2406	KANSL1	0	intronic	3.45	1b	4	4
rs17653211	20	17	44293205	rs2696609	44112638	0.958962	rs2696609	44112638	C	T	0.0135309	DBP	17:44112638:C:T	0.2406	KANSL1	0	intronic	6.144	1b	4	4
rs17653255	20	17	44293205	rs2696609	44112743	0.958962	rs2696609	44112743	A	C	0.0135408	DBP	17:44112743:A:C	0.2406	KANSL1:RP11-669E14.6	00:00:00	ncRNA_intronic	4.571	1d	4	4
rs17653906	20	17	44293205	rs2696609	44133142	0.958962	rs2696609	44133142	A	G	0.0133974	DBP	17:44133142:A:G	0.2406	KANSL1	0	intronic	8.151	6	4	5
rs17653998	20	17	44293205	rs2696609	44135985	0.958962	rs2696609	44135985	G	A	0.0130796	DBP	17:44135985:A:G	0.2406	KANSL1	0	intronic	5.844	1f	4	5
rs17654016	20	17	44293205	rs2696609	44137925	0.958962	rs2696609	44137925	C	T	0.0127414	DBP	17:44137925:C:T	0.2406	KANSL1	0	intronic	2.933	1f	4	5
rs17659731	20	17	44293205	rs2696609	44144634	0.958962	rs2696609	44144634	A	G	0.0127501	DBP	17:44144634:A:G	0.2406	KANSL1	0	intronic	4.791	1f	4	4
rs17659881	20	17	44293205	rs2696609	44157597	0.958962	rs2696609	44157597	G	A	0.0127414	DBP	17:44157597:A:G	0.2406	KANSL1	0	intronic	3.72	1d	4	5
rs17659953	20	17	44293205	rs2696609	44159725	0.958962	rs2696609	44159725	T	C	0.0126818	DBP	17:44159725:C:T	0.2406	KANSL1	0	intronic	9.366	NA	4	5
rs17660065	20	17	44293205	rs2696609	44162284	0.958962	rs2696609	44162284	C	T	0.0120625	DBP	17:44162284:C:T	0.2406	KANSL1	0	intronic	5.776	1f	4	5
rs17660132	20	17	44293205	rs2696609	44165803	0.958962	rs2696609	44165803	C	T	0.0126491	DBP	17:44165803:C:T	0.2406	KANSL1	0	intronic	3.841	1f	4	5
rs17660167	20	17	44293205	rs2696609	44166311	0.958962	rs2696609	44166311	T	C	0.0127468	DBP	17:44166311:C:T	0.2406	KANSL1	0	intronic	0.456	6	4	5
rs17660228	20	17	44293205	rs2696609	44166500	0.958962	rs2696609	44166500	A	G	0.0137574	DBP	17:44166500:A:G	0.2406	KANSL1	0	intronic	3.795	6	4	5
rs17660251	20	17	44293205	rs2696609	44166646	0.958962	rs2696609	44166646	T	C	0.0127468	DBP	17:44166646:C:T	0.2406	KANSL1	0	intronic	2.406	6	4	5
rs17660294	20	17	44293205	rs2696609	44167101	0.958962	rs2696609	44167101	C	T	0.0127512	DBP	17:44167101:C:T	0.2406	KANSL1	0	intronic	2.826	1f	4	5
rs17660337	20	17	44293205	rs2696609	44169605	0.958962	rs2696609	44169605	C	T	0.0118442	DBP	17:44169605:C:T	0.2406	KANSL1	0	intronic	8.708	NA	4	5
rs17660398	20	17	44293205	rs2696609	44170612	0.958962	rs2696609	44170612	T	C	0.0123697	DBP	17:44170612:C:T	0.2406	KANSL1	0	intronic	0.727	1f	4	5
rs17660464	20	17	44293205	rs2696609	44177993	0.958962	rs2696609	44177993	A	C	0.00913289	DBP	17:44177993:A:C	0.2406	KANSL1	0	intronic	4.151	1f	5	5
rs17660488	20	17	44293205	rs2696609	44178337	0.958962	rs2696609	44178337	C	T	0.0121079	DBP	17:44178337:C:T	0.2406	KANSL1	0	intronic	3.133	1d	2	7
rs17660595	20	17	44293205	rs2696609	44180954	0.958962	rs2696609	44180954	G	A	0.0121079	DBP	17:44180954:A:G	0.2406	KANSL1	0	intronic	1.368	1f	5	5
rs17660847	20	17	44293205	rs2696609	44189373	0.958962	rs2696609	44189373	T	C	0.0114874	DBP	17:44189373:C:T	0.2406	KANSL1	0	intronic	1.135	6	5	5
rs17660865	20	17	44293205	rs2696609	44189408	0.958962	rs2696609	44189408	C	T	0.0114949	DBP	17:44189408:C:T	0.2406	KANSL1	0	intronic	9.875	6	5	5
rs17660907	20	17	44293205	rs2696609	44191085	0.958962	rs2696609	44191085	A	G	0.011893	DBP	17:44191085:A:G	0.2406	KANSL1	0	intronic	1.249	1f	5	5
rs17660936	20	17	44293205	rs2696609	44191159	0.958962	rs2696609	44191159	T	C	0.0114874	DBP	17:44191159:C:T	0.2406	KANSL1	0	intronic	2.183	1f	5	5
rs17661015	20	17	44293205	rs2696609	44192957	0.958962	rs2696609	44192957	C	T	0.0151515	DBP	17:44192957:C:T	0.2406	KANSL1	0	intronic	4.906	6	2	5
rs17661027	20	17	44293205	rs2696609	44193097	0.958962	rs2696609	44193097	A	C	0.0115472	DBP	17:44193097:A:C	0.2406	KANSL1	0	intronic	2.15	1f	2	5
rs17661348	20	17	44293205	rs2696609	44207066	0.958962	rs2696609	44207066	G	A	0.0116677	DBP	17:44207066:A:G	0.2406	KANSL1	0	intronic	8.861	1f	4	5
rs17661385	20	17	44293205	rs2696609	44207778	0.958962	rs2696609	44207778	G	A	0.0116677	DBP	17:44207778:A:G	0.2406	KANSL1	0	intronic	5.092	1f	2	5
rs17664048	20	17	44293205	rs2696609	44278742	0.958962	rs2696609	44278742	G	A	0.00895781	DBP	17:44278742:A:G	0.2406	KANSL1	0	intronic	2.606	6	5	5
rs17665188	20	17	44293205	rs2696609	44357351	0.928025	rs2696609	44357351	C	T	0.0119888	DBP	17:44357351:C:T	0.2386	ARL17B	0	intronic	7.502	NA	2	15
rs17686610	20	17	44293205	rs2696609	43710384	0.953951	rs2696609	43710384	C	A	0.0140735	DBP	17:43710384:A:C	0.2396	CRHR1-IT1:CRHR1:RP11-105N13.4	00:00:00	ncRNA_intronic	6.793	5	4	5
rs17687462	20	17	44293205	rs2696609	43744990	0.953951	rs2696609	43744990	T	C	0.0140844	DBP	17:43744990:C:T	0.2396	CRHR1:RP11-105N13.4	00:00:00	ncRNA_intronic	0.607	1f	5	14
rs17687504	20	17	44293205	rs2696609	43746721	0.953951	rs2696609	43746721	G	A	0.0140887	DBP	17:43746721:A:G	0.2396	CRHR1:RP11-105N13.4	00:00:00	ncRNA_intronic	4.93	6	5	14
rs17687534	20	17	44293205	rs2696609	43749579	0.953951	rs2696609	43749579	C	T	0.0141642	DBP	17:43749579:C:T	0.2396	CRHR1:RP11-105N13.4	00:00:00	ncRNA_intronic	0.832	1f	6	14
rs17687571	20	17	44293205	rs2696609	43750010	0.953951	rs2696609	43750010	A	G	0.0150927	DBP	17:43750010:A:G	0.2396	CRHR1:RP11-105N13.4	00:00:00	ncRNA_intronic	2.789	1f	5	14
rs17687625	20	17	44293205	rs2696609	43750238	0.953951	rs2696609	43750238	G	A	0.0142498	DBP	17:43750238:A:G	0.2396	CRHR1:RP11-105N13.4	00:00:00	ncRNA_exonic	3.272	1f	5	14
rs17687667	20	17	44293205	rs2696609	43754099	0.953951	rs2696609	43754099	A	G	0.0148943	DBP	17:43754099:A:G	0.2396	CRHR1:RP11-105N13.4	00:00:00	ncRNA_intronic	4.699	1f	5	14
rs17687838	20	17	44293205	rs2696609	43759048	0.953951	rs2696609	43759048	C	T	0.0139908	DBP	17:43759048:C:T	0.2396	CRHR1:RP11-105N13.4	00:00:00	ncRNA_intronic	14.09	1f	5	14
rs17687849	20	17	44293205	rs2696609	43759719	0.953951	rs2696609	43759719	G	A	0.0156193	DBP	17:43759719:A:G	0.2396	CRHR1:RP11-105N13.4	00:00:00	ncRNA_intronic	6.685	1f	5	14
rs17688032	20	17	44293205	rs2696609	43763202	0.953951	rs2696609	43763202	A	G	0.0138766	DBP	17:43763202:A:G	0.2396	CRHR1:RP11-105N13.4	00:00:00	ncRNA_intronic	7.072	1f	5	14
rs17688056	20	17	44293205	rs2696609	43763241	0.953951	rs2696609	43763241	T	C	0.0138766	DBP	17:43763241:C:T	0.2396	CRHR1:RP11-105N13.4	00:00:00	ncRNA_intronic	0.008	6	5	14
rs17688068	20	17	44293205	rs2696609	43763935	0.953951	rs2696609	43763935	G	A	0.0135319	DBP	17:43763935:A:G	0.2396	CRHR1:RP11-105N13.4	00:00:00	ncRNA_intronic	6.541	1f	2	14
rs17688090	20	17	44293205	rs2696609	43764987	0.953951	rs2696609	43764987	A	G	0.0138766	DBP	17:43764987:A:G	0.2396	CRHR1:RP11-105N13.4	00:00:00	ncRNA_intronic	0.77	1f	5	14
rs17688126	20	17	44293205	rs2696609	43765080	0.953951	rs2696609	43765080	G	A	0.0138721	DBP	17:43765080:A:G	0.2396	CRHR1:RP11-105N13.4	00:00:00	ncRNA_intronic	0.746	5	5	14
rs17688249	20	17	44293205	rs2696609	43766754	0.953951	rs2696609	43766754	T	C	0.0141427	DBP	17:43766754:C:T	0.2396	CRHR1:RP11-105N13.4	00:00:00	ncRNA_intronic	2.173	4	7	14
rs17688296	20	17	44293205	rs2696609	43767815	0.953951	rs2696609	43767815	T	C	0.0138045	DBP	17:43767815:C:T	0.2396	CRHR1:RP11-105N13.4	00:00:00	ncRNA_intronic	1.385	1f	7	13
rs17688391	20	17	44293205	rs2696609	43772109	0.953951	rs2696609	43772109	A	C	0.0144983	DBP	17:43772109:A:C	0.2396	CRHR1:RP11-105N13.4	00:00:00	ncRNA_intronic	5.36	6	9	14
rs17688410	20	17	44293205	rs2696609	43772251	0.953951	rs2696609	43772251	T	C	0.0137371	DBP	17:43772251:C:T	0.2396	CRHR1:RP11-105N13.4	00:00:00	ncRNA_intronic	5.744	6	13	14
rs17688434	20	17	44293205	rs2696609	43772540	0.953951	rs2696609	43772540	A	G	0.0140268	DBP	17:43772540:A:G	0.2396	CRHR1:RP11-105N13.4	00:00:00	ncRNA_intronic	10.62	6	13	14
rs17688452	20	17	44293205	rs2696609	43773085	0.953951	rs2696609	43773085	A	G	0.0137371	DBP	17:43773085:A:G	0.2396	CRHR1:RP11-105N13.4	00:00:00	ncRNA_intronic	11.87	6	13	14
rs17688511	20	17	44293205	rs2696609	43773607	0.948737	rs2696609	43773607	G	T	0.0141438	DBP	17:43773607:G:T	0.2406	CRHR1:RP11-105N13.4	00:00:00	ncRNA_intronic	5.577	6	13	14
rs17688558	20	17	44293205	rs2696609	43773943	0.953951	rs2696609	43773943	G	A	0.0137371	DBP	17:43773943:A:G	0.2396	CRHR1:RP11-105N13.4	00:00:00	ncRNA_intronic	5.789	2b	13	14
rs17688767	20	17	44293205	rs2696609	43777542	0.953951	rs2696609	43777542	G	A	0.0137371	DBP	17:43777542:A:G	0.2396	CRHR1:RP11-105N13.4	00:00:00	ncRNA_intronic	2.389	1f	7	14
rs17688773	20	17	44293205	rs2696609	43777710	0.953951	rs2696609	43777710	C	T	0.0141103	DBP	17:43777710:C:T	0.2396	CRHR1:RP11-105N13.4	00:00:00	ncRNA_intronic	4.212	1f	7	14
rs17688875	20	17	44293205	rs2696609	43778406	0.953951	rs2696609	43778406	G	A	0.0135496	DBP	17:43778406:A:G	0.2396	CRHR1:RP11-105N13.4	00:00:00	ncRNA_intronic	7.559	6	5	14
rs17688922	20	17	44293205	rs2696609	43779351	0.953951	rs2696609	43779351	A	G	0.0145998	DBP	17:43779351:A:G	0.2396	CRHR1:RP11-105N13.4	00:00:00	ncRNA_intronic	2.617	6	5	14
rs17689104	20	17	44293205	rs2696609	43782492	0.953951	rs2696609	43782492	G	A	0.0139273	DBP	17:43782492:A:G	0.2396	CRHR1:RP11-105N13.4	00:00:00	ncRNA_intronic	14.01	6	5	14
rs17689116	20	17	44293205	rs2696609	43782558	0.953951	rs2696609	43782558	C	T	0.0138511	DBP	17:43782558:C:T	0.2396	CRHR1:RP11-105N13.4	00:00:00	ncRNA_intronic	10.89	6	5	14
rs17689218	20	17	44293205	rs2696609	43785808	0.953951	rs2696609	43785808	C	T	0.0121968	DBP	17:43785808:C:T	0.2396	CRHR1:RP11-105N13.4	00:00:00	ncRNA_intronic	5.157	1f	5	14
rs17689378	20	17	44293205	rs2696609	43881790	0.943622	rs2696609	43881790	T	C	0.0110103	DBP	17:43881790:C:T	0.2396	CRHR1:RP11-105N13.4	00:00:00	ncRNA_intronic	2.946	5	5	14
rs17689471	20	17	44293205	rs2696609	43892973	0.953951	rs2696609	43892973	C	T	0.0104106	DBP	17:43892973:C:T	0.2396	CRHR1:RP11-105N13.4	00:00:00	ncRNA_intronic	0.364	1f	5	14
rs17689824	20	17	44293205	rs2696609	43904397	0.953951	rs2696609	43904397	T	C	0.0100851	DBP	17:43904397:C:T	0.2396	CRHR1	0	intronic	4.425	1f	5	14
rs17689882	20	17	44293205	rs2696609	43906828	0.948973	rs2696609	43906828	A	G	0.0122814	DBP	17:43906828:A:G	0.2386	CRHR1	0	intronic	6.828	1f	4	15
rs17689918	20	17	44293205	rs2696609	43910088	0.953951	rs2696609	43910088	A	G	0.00993811	DBP	17:43910088:A:G	0.2396	CRHR1	0	intronic	3.79	1f	5	15
rs17690176	20	17	44293205	rs2696609	43916773	0.948737	rs2696609	43916773	C	A	0.0110581	DBP	17:43916773:A:C	0.2406	CRHR1	3578	intergenic	5.131	5	5	15
rs17690314	20	17	44293205	rs2696609	43919884	0.953951	rs2696609	43919884	G	T	0.0108066	DBP	17:43919884:G:T	0.2396	MAPT-AS1	1132	intergenic	0.244	1f	5	15
rs17690326	20	17	44293205	rs2696609	43920974	0.953951	rs2696609	43920974	C	T	0.0106009	DBP	17:43920974:C:T	0.2396	MAPT-AS1	42	downstream	0.997	1f	5	15
rs17690661	20	17	44293205	rs2696609	43924521	0.953951	rs2696609	43924521	A	G	0.0112553	DBP	17:43924521:A:G	0.2396	MAPT-AS1	0	ncRNA_intronic	0.069	1f	5	15
rs17690679	20	17	44293205	rs2696609	43924803	0.953951	rs2696609	43924803	G	A	0.0110103	DBP	17:43924803:A:G	0.2396	MAPT-AS1	0	ncRNA_intronic	6.843	1f	5	15
rs17690987	20	17	44293205	rs2696609	43931626	0.953951	rs2696609	43931626	C	T	0.0115791	DBP	17:43931626:C:T	0.2396	MAPT-AS1	0	ncRNA_intronic	8.747	3a	5	14
rs17691328	20	17	44293205	rs2696609	43955487	0.943622	rs2696609	43955487	T	C	0.0153737	DBP	17:43955487:C:T	0.2396	MAPT-AS1	0	ncRNA_intronic	2.284	1f	9	14
rs17691466	20	17	44293205	rs2696609	43968219	0.953951	rs2696609	43968219	G	A	0.0127231	DBP	17:43968219:A:G	0.2396	MAPT-AS1	0	ncRNA_intronic	4.578	6	5	14
rs17691610	20	17	44293205	rs2696609	43970662	0.953951	rs2696609	43970662	T	G	0.0134922	DBP	17:43970662:G:T	0.2396	MAPT-AS1	0	ncRNA_intronic	1.819	1f	5	14
rs17760577	20	17	44293205	rs2696609	43741452	0.953951	rs2696609	43741452	T	C	0.0131149	DBP	17:43741452:C:T	0.2396	CRHR1:RP11-105N13.4	00:00:00	ncRNA_intronic	0.315	1f	5	14
rs17760631	20	17	44293205	rs2696609	43743045	0.953951	rs2696609	43743045	C	T	0.0141308	DBP	17:43743045:C:T	0.2396	CRHR1:RP11-105N13.4	00:00:00	ncRNA_intronic	4.503	1f	5	14
rs17760733	20	17	44293205	rs2696609	43746276	0.948973	rs2696609	43746276	T	G	0.0137612	DBP	17:43746276:G:T	0.2386	CRHR1:RP11-105N13.4	00:00:00	ncRNA_intronic	0.132	6	5	14
rs17761046	20	17	44293205	rs2696609	43758382	0.953951	rs2696609	43758382	C	T	0.0139908	DBP	17:43758382:C:T	0.2396	CRHR1:RP11-105N13.4	00:00:00	ncRNA_intronic	1.491	1f	5	14
rs17761100	20	17	44293205	rs2696609	43760389	0.953951	rs2696609	43760389	G	A	0.0139908	DBP	17:43760389:A:G	0.2396	CRHR1:RP11-105N13.4	00:00:00	ncRNA_intronic	5.107	6	5	14
rs17761207	20	17	44293205	rs2696609	43762255	0.953951	rs2696609	43762255	C	T	0.0131273	DBP	17:43762255:C:T	0.2396	CRHR1:RP11-105N13.4	00:00:00	ncRNA_intronic	0.314	6	5	14
rs17761387	20	17	44293205	rs2696609	43765450	0.953951	rs2696609	43765450	A	G	0.0139481	DBP	17:43765450:A:G	0.2396	CRHR1:RP11-105N13.4	00:00:00	ncRNA_intronic	4.225	1f	7	14
rs17761581	20	17	44293205	rs2696609	43769088	0.953951	rs2696609	43769088	C	T	0.0138026	DBP	17:43769088:C:T	0.2396	CRHR1:RP11-105N13.4	00:00:00	ncRNA_intronic	3.367	7	12	14
rs17761838	20	17	44293205	rs2696609	43774959	0.953951	rs2696609	43774959	C	T	0.0137371	DBP	17:43774959:C:T	0.2396	CRHR1:RP11-105N13.4	00:00:00	ncRNA_intronic	0.916	6	9	14
rs17761985	20	17	44293205	rs2696609	43776787	0.953951	rs2696609	43776787	T	C	0.0137371	DBP	17:43776787:C:T	0.2396	CRHR1:RP11-105N13.4	00:00:00	ncRNA_intronic	2.354	6	9	14
rs17762165	20	17	44293205	rs2696609	43778602	0.953951	rs2696609	43778602	T	C	0.0145201	DBP	17:43778602:C:T	0.2396	CRHR1:RP11-105N13.4	00:00:00	ncRNA_intronic	1.734	1f	5	14
rs17762308	20	17	44293205	rs2696609	43780948	0.953951	rs2696609	43780948	C	T	0.0141985	DBP	17:43780948:C:T	0.2396	CRHR1:RP11-105N13.4	00:00:00	ncRNA_intronic	7.297	1f	5	14
rs17762361	20	17	44293205	rs2696609	43781778	0.953951	rs2696609	43781778	G	A	0.0145118	DBP	17:43781778:A:G	0.2396	CRHR1:RP11-105N13.4	00:00:00	ncRNA_intronic	6.303	6	5	14
rs17762535	20	17	44293205	rs2696609	43787130	0.953951	rs2696609	43787130	C	T	0.0121299	DBP	17:43787130:C:T	0.2396	CRHR1:RP11-105N13.4	00:00:00	ncRNA_intronic	1.778	1f	7	14
rs17762769	20	17	44293205	rs2696609	43893403	0.953951	rs2696609	43893403	A	G	0.00981637	DBP	17:43893403:A:G	0.2396	CRHR1:RP11-105N13.4	00:00:00	ncRNA_intronic	2.086	1f	5	14
rs17762882	20	17	44293205	rs2696609	43898887	0.953951	rs2696609	43898887	C	T	0.00989992	DBP	17:43898887:C:T	0.2396	CRHR1	0	intronic	0.436	5	5	15
rs17762912	20	17	44293205	rs2696609	43899161	0.953951	rs2696609	43899161	C	A	0.00995779	DBP	17:43899161:A:C	0.2396	CRHR1	0	intronic	5.16	5	5	15
rs17762954	20	17	44293205	rs2696609	43899786	0.953951	rs2696609	43899786	T	C	0.0100269	DBP	17:43899786:C:T	0.2396	CRHR1	0	intronic	10.48	1f	5	15
rs17763050	20	17	44293205	rs2696609	43903336	0.953951	rs2696609	43903336	A	G	0.0105538	DBP	17:43903336:A:G	0.2396	CRHR1	0	intronic	0.116	5	5	14
rs17763086	20	17	44293205	rs2696609	43905481	0.953951	rs2696609	43905481	G	T	0.0100839	DBP	17:43905481:G:T	0.2396	CRHR1	0	intronic	0.042	1f	5	14
rs17763199	20	17	44293205	rs2696609	43910183	0.948901	rs2696609	43910183	A	G	0.0106454	DBP	17:43910183:A:G	0.2386	CRHR1	0	intronic	0.66	5	5	15
rs17763515	20	17	44293205	rs2696609	43917818	0.953951	rs2696609	43917818	A	G	0.0112198	DBP	17:43917818:A:G	0.2396	MAPT-AS1	3198	intergenic	2.528	5	5	15
rs17763533	20	17	44293205	rs2696609	43918190	0.953951	rs2696609	43918190	C	T	0.0100735	DBP	17:43918190:C:T	0.2396	MAPT-AS1	2826	intergenic	0.248	1f	5	15
rs17763596	20	17	44293205	rs2696609	43921210	0.953951	rs2696609	43921210	T	G	0.0104193	DBP	17:43921210:G:T	0.2396	MAPT-AS1	0	ncRNA_exonic	0.826	1f	5	15
rs17763634	20	17	44293205	rs2696609	43921754	0.953951	rs2696609	43921754	C	T	0.0104279	DBP	17:43921754:C:T	0.2396	MAPT-AS1	0	ncRNA_intronic	1.123	1f	5	15
rs17769490	20	17	44293205	rs2696609	43925605	0.948737	rs2696609	43925605	A	G	0.0122495	DBP	17:43925605:A:G	0.2406	MAPT-AS1	0	ncRNA_intronic	5.553	1f	5	14
rs17769552	20	17	44293205	rs2696609	43927290	0.909342	rs2696609	43927290	A	G	0.0216797	DBP	17:43927290:A:G	0.2326	MAPT-AS1	0	ncRNA_intronic	1.021	1f	5	14
rs17770108	20	17	44293205	rs2696609	43961292	0.953951	rs2696609	43961292	T	G	0.0123415	DBP	17:43961292:G:T	0.2396	MAPT-AS1	0	ncRNA_intronic	2.839	6	7	14
rs17770120	20	17	44293205	rs2696609	43963943	0.953951	rs2696609	43963943	A	C	0.0126568	DBP	17:43963943:A:C	0.2396	MAPT-AS1	0	ncRNA_intronic	13.33	6	14	14
rs17770150	20	17	44293205	rs2696609	43964163	0.953951	rs2696609	43964163	A	G	0.012955	DBP	17:43964163:A:G	0.2396	MAPT-AS1	0	ncRNA_intronic	3.117	1f	14	14
rs17770186	20	17	44293205	rs2696609	43964191	0.953951	rs2696609	43964191	A	C	0.0126568	DBP	17:43964191:A:C	0.2396	MAPT-AS1	0	ncRNA_intronic	2.874	1f	14	14
rs17770296	20	17	44293205	rs2696609	43969136	0.953951	rs2696609	43969136	T	C	0.0150138	DBP	17:43969136:C:T	0.2396	MAPT-AS1	0	ncRNA_intronic	1.453	1f	5	14
rs17770337	20	17	44293205	rs2696609	43969779	0.953951	rs2696609	43969779	T	G	0.0126568	DBP	17:43969779:G:T	0.2396	MAPT-AS1	0	ncRNA_intronic	1.512	6	5	14
rs17770343	20	17	44293205	rs2696609	43970154	0.953951	rs2696609	43970154	C	T	0.0126568	DBP	17:43970154:C:T	0.2396	MAPT-AS1	0	ncRNA_intronic	11.08	6	5	14
rs1800547	20	17	44293205	rs2696609	44051846	0.958962	rs2696609	44051846	G	A	0.0128744	DBP	17:44051846:A:G	0.2406	MAPT	0	UTR5	11.88	1f	3	15
rs1864324	20	17	44293205	rs2696609	43977702	0.953951	rs2696609	43977702	T	C	0.0120765	DBP	17:43977702:C:T	0.2396	MAPT	0	intronic	8.354	5	5	13
rs1864325	20	17	44293205	rs2696609	43977827	0.953951	rs2696609	43977827	T	C	0.0138304	DBP	17:43977827:C:T	0.2396	MAPT	0	intronic	4.16	1f	5	13
rs1876827	20	17	44293205	rs2696609	43911832	0.953951	rs2696609	43911832	C	T	0.0105756	DBP	17:43911832:C:T	0.2396	CRHR1	0	intronic	3.947	NA	5	15
rs1876828	20	17	44293205	rs2696609	43911525	0.953951	rs2696609	43911525	T	C	0.0108487	DBP	17:43911525:C:T	0.2396	CRHR1	0	intronic	0.766	NA	5	15
rs1876829	20	17	44293205	rs2696609	43911443	0.953951	rs2696609	43911443	C	T	0.0107489	DBP	17:43911443:C:T	0.2396	CRHR1	0	intronic	5.472	NA	5	15
rs1876830	20	17	44293205	rs2696609	43911352	0.953951	rs2696609	43911352	T	C	0.0105756	DBP	17:43911352:C:T	0.2396	CRHR1	0	intronic	4.044	NA	5	15
rs1876831	20	17	44293205	rs2696609	43907745	0.953951	rs2696609	43907745	T	C	0.0108697	DBP	17:43907745:C:T	0.2396	CRHR1	0	intronic	3.27	NA	5	15
rs1880749	20	17	44293205	rs2696609	43792586	0.953951	rs2696609	43792586	C	A	0.0121299	DBP	17:43792586:A:C	0.2396	CRHR1:RP11-105N13.4	00:00:00	ncRNA_intronic	5.541	6	5	14
rs1880752	20	17	44293205	rs2696609	43806264	0.953951	rs2696609	43806264	T	C	0.0118274	DBP	17:43806264:C:T	0.2396	CRHR1:RP11-105N13.4	00:00:00	ncRNA_intronic	0.297	6	7	14
rs1912151	20	17	44293205	rs2696609	43902944	0.953951	rs2696609	43902944	T	C	0.0105538	DBP	17:43902944:C:T	0.2396	CRHR1	0	UTR3	2.785	NA	5	14
rs1918786	20	17	44293205	rs2696609	44279101	0.958962	rs2696609	44279101	G	A	0.00895781	DBP	17:44279101:A:G	0.2406	KANSL1	0	intronic	8.209	7	5	5
rs1918787	20	17	44293205	rs2696609	44279252	0.958962	rs2696609	44279252	G	A	0.00895781	DBP	17:44279252:A:G	0.2406	KANSL1	0	intronic	3.797	5	5	5
rs1966345	20	17	44293205	rs2696609	44197806	0.958962	rs2696609	44197806	C	T	0.0113093	DBP	17:44197806:C:T	0.2406	KANSL1	0	intronic	6.065	NA	2	5
rs1981997	20	17	44293205	rs2696609	44056767	0.958962	rs2696609	44056767	A	G	0.0127931	DBP	17:44056767:A:G	0.2406	MAPT	0	intronic	6.018	1f	4	15
rs1981998	20	17	44293205	rs2696609	44056833	0.958962	rs2696609	44056833	A	G	0.0133299	DBP	17:44056833:A:G	0.2406	MAPT	0	intronic	0.89	1f	4	15
rs1984937	20	17	44293205	rs2696609	43980530	0.953951	rs2696609	43980530	C	A	0.0123234	DBP	17:43980530:A:C	0.2396	MAPT	0	intronic	8.638	NA	2	14
rs1991556	20	17	44293205	rs2696609	44083402	0.938028	rs2696609	44083402	A	G	0.0190213	DBP	17:44083402:A:G	0.2425	MAPT	0	intronic	1.265	1f	4	15
rs199439	20	17	44293205	rs2696609	44793503	0.850515	rs2696609	44793503	G	A	0.0376575	DBP	17:44793503:A:G	0.2247	NSF	0	intronic	17.18	6	4	5
rs199443	20	17	44293205	rs2696609	44819565	0.841063	rs2696609	44819565	T	C	0.0326612	DBP	17:44819565:C:T	0.2227	NSF	0	intronic	5.03	1d	4	5
rs199445	20	17	44293205	rs2696609	44817408	0.841063	rs2696609	44817408	T	C	0.0316324	DBP	17:44817408:C:T	0.2227	NSF	0	intronic	2.705	1f	4	5
rs199447	20	17	44293205	rs2696609	44812188	0.831001	rs2696609	44812188	T	C	0.0363635	DBP	17:44812188:C:T	0.2227	NSF	0	intronic	2.564	7	4	5
rs199448	20	17	44293205	rs2696609	44809001	0.841063	rs2696609	44809001	G	A	0.0388641	DBP	17:44809001:A:G	0.2227	NSF	0	intronic	5.383	6	4	5
rs199451	20	17	44293205	rs2696609	44801784	0.841063	rs2696609	44801784	A	G	0.0370221	DBP	17:44801784:A:G	0.2227	NSF	0	intronic	0.104	5	4	5
rs199456	20	17	44293205	rs2696609	44797919	0.850515	rs2696609	44797919	T	C	0.0381274	DBP	17:44797919:C:T	0.2247	NSF	0	intronic	15.73	1b	4	5
rs199457	20	17	44293205	rs2696609	44795469	0.850515	rs2696609	44795469	T	C	0.0373161	DBP	17:44795469:C:T	0.2247	NSF	0	intronic	0.704	5	4	5
rs199498	20	17	44865439	rs2074404	44865603	0.740248	rs2696609	44865603	C	T	0.017167	DBP	17:44865603:C:T	0.2247	WNT3	0	intronic	3.65	1f	5	14
rs199499	20	17	44865439	rs2074404	44865498	0.682503	rs2696609	44865498	T	C	0.0438411	DBP	17:44865498:C:T	0.2078	WNT3	0	intronic	0.096	5	5	14
rs199502	20	17	44293205	rs2696609	44862347	0.703432	rs2696609	44862347	A	G	0.0138103	DBP	17:44862347:A:G	0.2326	WNT3	0	intronic	4.014	5	5	14
rs199504	20	17	44293205	rs2696609	44861003	0.792954	rs2696609	44861003	C	T	0.0199658	DBP	17:44861003:C:T	0.2207	WNT3	0	intronic	1.171	1f	2	14
rs199505	20	17	44293205	rs2696609	44859410	0.789056	rs2696609	44859410	A	G	0.0225644	DBP	17:44859410:A:G	0.2177	WNT3	0	intronic	2.453	1f	4	14
rs199506	20	17	44293205	rs2696609	44859031	0.807643	rs2696609	44859031	A	G	0.0166081	DBP	17:44859031:A:G	0.2197	WNT3	0	intronic	5.804	1f	5	14
rs199507	20	17	44293205	rs2696609	44858855	0.797774	rs2696609	44858855	A	G	0.0255623	DBP	17:44858855:A:G	0.2197	WNT3	0	intronic	3.286	1f	5	14
rs199509	20	17	44293205	rs2696609	44858728	0.797774	rs2696609	44858728	G	A	0.0255692	DBP	17:44858728:A:G	0.2197	WNT3	0	intronic	4.152	6	5	14
rs199512	20	17	44293205	rs2696609	44857352	0.797774	rs2696609	44857352	T	C	0.0263283	DBP	17:44857352:C:T	0.2197	WNT3	0	intronic	7.839	5	2	14
rs199513	20	17	44293205	rs2696609	44856932	0.784738	rs2696609	44856932	A	G	0.0236954	DBP	17:44856932:A:G	0.2167	WNT3	0	intronic	3.207	1f	1	14
rs199514	20	17	44293205	rs2696609	44856881	0.793401	rs2696609	44856881	G	A	0.0237572	DBP	17:44856881:A:G	0.2187	WNT3	0	intronic	2.162	1f	1	14
rs199516	20	17	44293205	rs2696609	44856485	0.802174	rs2696609	44856485	C	T	0.0272898	DBP	17:44856485:C:T	0.2207	WNT3	0	intronic	5.101	1f	5	14
rs199525	20	17	44293205	rs2696609	44847834	0.802174	rs2696609	44847834	G	T	0.0209224	DBP	17:44847834:G:T	0.2207	WNT3	0	intronic	6.88	2b	1	12
rs199528	20	17	44293205	rs2696609	44843136	0.802174	rs2696609	44843136	T	C	0.0211795	DBP	17:44843136:C:T	0.2207	WNT3	0	intronic	0.646	1f	4	5
rs199533	20	17	44293205	rs2696609	44828931	0.841063	rs2696609	44828931	A	G	0.0365417	DBP	17:44828931:A:G	0.2227	NSF	0	exonic	11.26	NA	4	4
rs199534	20	17	44293205	rs2696609	44824213	0.841063	rs2696609	44824213	G	T	0.0328402	DBP	17:44824213:G:T	0.2227	NSF	0	intronic	0.871	6	4	5
rs199535	20	17	44293205	rs2696609	44822662	0.841063	rs2696609	44822662	G	A	0.0354065	DBP	17:44822662:A:G	0.2227	NSF	0	intronic	12.39	6	4	5
rs2004260	20	17	44293205	rs2696609	43822398	0.953951	rs2696609	43822398	C	T	0.0114874	DBP	17:43822398:C:T	0.2396	CRHR1:RP11-105N13.4	00:00:00	ncRNA_intronic	5.045	NA	5	14
rs2004673	20	17	44293205	rs2696609	44075099	0.958962	rs2696609	44075099	C	T	0.0127231	DBP	17:44075099:C:T	0.2406	MAPT	0	intronic	2.427	4	4	15
rs2019816	20	17	44293205	rs2696609	43959661	0.953951	rs2696609	43959661	A	G	0.0122734	DBP	17:43959661:A:G	0.2396	MAPT-AS1	0	ncRNA_intronic	0.262	NA	9	14
rs2040844	20	17	44293205	rs2696609	43767219	0.953951	rs2696609	43767219	C	A	0.0138026	DBP	17:43767219:A:C	0.2396	CRHR1:RP11-105N13.4	00:00:00	ncRNA_intronic	8.175	NA	7	14
rs2040846	20	17	44293205	rs2696609	43762846	0.953951	rs2696609	43762846	G	A	0.0140246	DBP	17:43762846:A:G	0.2396	CRHR1:RP11-105N13.4	00:00:00	ncRNA_intronic	0.921	NA	5	14
rs2049515	20	17	44293205	rs2696609	43761856	0.953951	rs2696609	43761856	T	C	0.0133974	DBP	17:43761856:C:T	0.2396	CRHR1:RP11-105N13.4	00:00:00	ncRNA_intronic	11.59	1f	5	14
rs2055794	20	17	44293205	rs2696609	43951717	0.953951	rs2696609	43951717	A	G	0.0120263	DBP	17:43951717:A:G	0.2396	MAPT-AS1	0	ncRNA_intronic	0.506	1f	7	14
rs2055795	20	17	44293205	rs2696609	43951995	0.953951	rs2696609	43951995	T	C	0.0120263	DBP	17:43951995:C:T	0.2396	MAPT-AS1	0	ncRNA_intronic	2.517	7	7	14
rs2066899	20	17	44293205	rs2696609	44155732	0.98964	rs2696609	44155732	T	C	0.00575884	DBP	17:44155732:C:T	0.2465	KANSL1	0	intronic	0.254	NA	2	5
rs2074404	20	17	44865439	rs2074404	44865439	1	rs2696609	44865439	G	T	0.00762619	DBP	17:44865439:G:T	0.2664	WNT3	0	intronic	3.184	1f	5	14
rs2082068	20	17	44293205	rs2696609	43979971	0.953951	rs2696609	43979971	T	C	0.0133369	DBP	17:43979971:C:T	0.2396	MAPT	0	intronic	1.433	6	5	14
rs2097760	20	17	44293205	rs2696609	44168677	0.98964	rs2696609	44168677	G	A	0.0051135	DBP	17:44168677:A:G	0.2465	KANSL1	0	intronic	4.336	NA	4	5
rs2106784	20	17	44293205	rs2696609	43949892	0.953951	rs2696609	43949892	T	C	0.0119641	DBP	17:43949892:C:T	0.2396	MAPT-AS1	0	ncRNA_intronic	5.172	NA	5	14
rs2106785	20	17	44293205	rs2696609	43919105	0.948973	rs2696609	43919105	T	C	0.0133116	DBP	17:43919105:C:T	0.2386	MAPT-AS1	1911	intergenic	2.898	NA	5	15
rs2141298	20	17	44293205	rs2696609	44268488	0.953729	rs2696609	44268488	T	C	0.00625719	DBP	17:44268488:C:T	0.2416	KANSL1	0	intronic	6.293	NA	1	1
rs2158072	20	17	44293205	rs2696609	43950195	0.953951	rs2696609	43950195	C	T	0.0119593	DBP	17:43950195:C:T	0.2396	MAPT-AS1	0	ncRNA_intronic	4.343	NA	5	14
rs2158257	20	17	44293205	rs2696609	44104343	0.958962	rs2696609	44104343	C	A	0.0131645	DBP	17:44104343:A:C	0.2406	MAPT	0	UTR3	4.725	NA	4	4
rs2163129	20	17	44293205	rs2696609	44056433	0.958962	rs2696609	44056433	C	T	0.0133994	DBP	17:44056433:C:T	0.2406	MAPT	0	intronic	4.81	6	4	15
rs2163130	20	17	44293205	rs2696609	44056434	0.958962	rs2696609	44056434	A	G	0.0133299	DBP	17:44056434:A:G	0.2406	MAPT	0	intronic	0.036	6	4	15
rs2188888	20	17	44293205	rs2696609	43953695	0.953951	rs2696609	43953695	C	T	0.0120998	DBP	17:43953695:C:T	0.2396	MAPT-AS1	0	ncRNA_intronic	1.515	NA	7	14
rs2217394	20	17	44293205	rs2696609	44053448	0.958962	rs2696609	44053448	G	A	0.0132128	DBP	17:44053448:A:G	0.2406	MAPT	0	UTR5	3.552	1f	4	15
rs2316763	20	17	44293205	rs2696609	43895530	0.953951	rs2696609	43895530	T	C	0.00996696	DBP	17:43895530:C:T	0.2396	CRHR1	0	intronic	3.423	3a	5	15
rs2316764	20	17	44293205	rs2696609	43895602	0.953951	rs2696609	43895602	G	T	0.00995779	DBP	17:43895602:G:T	0.2396	CRHR1	0	intronic	2.579	5	5	15
rs2316765	20	17	44293205	rs2696609	43912454	0.953951	rs2696609	43912454	C	T	0.0105756	DBP	17:43912454:C:T	0.2396	CRHR1	0	UTR3	11.01	4	5	15
rs2316769	20	17	44293205	rs2696609	43930798	0.953951	rs2696609	43930798	G	A	0.0116948	DBP	17:43930798:A:G	0.2396	MAPT-AS1	0	ncRNA_intronic	1.441	7	5	14
rs2316771	20	17	44293205	rs2696609	43945931	0.953951	rs2696609	43945931	C	T	0.0172046	DBP	17:43945931:C:T	0.2396	MAPT-AS1	0	ncRNA_intronic	11.19	5	5	14
rs2316772	20	17	44293205	rs2696609	43946423	0.9433	rs2696609	43946423	C	A	0.0105526	DBP	17:43946423:A:C	0.2416	MAPT-AS1	0	ncRNA_intronic	8.687	6	5	14
rs2316773	20	17	44293205	rs2696609	43946536	0.953951	rs2696609	43946536	T	C	0.0117154	DBP	17:43946536:C:T	0.2396	MAPT-AS1	0	ncRNA_intronic	3.6	7	5	14
rs2316774	20	17	44293205	rs2696609	43946642	0.953951	rs2696609	43946642	C	T	0.0117227	DBP	17:43946642:C:T	0.2396	MAPT-AS1	0	ncRNA_intronic	8.704	6	5	14
rs2316782	20	17	44293205	rs2696609	44010040	0.953951	rs2696609	44010040	G	A	0.0112509	DBP	17:44010040:A:G	0.2396	MAPT	0	intronic	11.03	6	5	14
rs2316784	20	17	44293205	rs2696609	44021699	0.953951	rs2696609	44021699	T	G	0.0109137	DBP	17:44021699:G:T	0.2396	MAPT	0	intronic	3.529	1f	4	14
rs2316953	20	17	44293205	rs2696609	44140341	0.958962	rs2696609	44140341	A	G	0.0127501	DBP	17:44140341:A:G	0.2406	KANSL1	0	intronic	0.563	6	4	5
rs2316955	20	17	44293205	rs2696609	44161985	0.958962	rs2696609	44161985	G	T	0.0127414	DBP	17:44161985:G:T	0.2406	KANSL1	0	intronic	3.341	6	4	5
rs241020	20	17	44293205	rs2696609	43738676	0.953951	rs2696609	43738676	A	C	0.0142902	DBP	17:43738676:A:C	0.2396	CRHR1:RP11-105N13.4	00:00:00	ncRNA_intronic	0.134	NA	7	14
rs241021	20	17	44293205	rs2696609	43738627	0.953951	rs2696609	43738627	G	T	0.0134823	DBP	17:43738627:G:T	0.2396	CRHR1:RP11-105N13.4	00:00:00	ncRNA_intronic	0.327	NA	7	14
rs241022	20	17	44293205	rs2696609	43737730	0.953951	rs2696609	43737730	C	T	0.013892	DBP	17:43737730:C:T	0.2396	CRHR1:RP11-105N13.4	00:00:00	ncRNA_intronic	3.329	NA	5	14
rs241023	20	17	44293205	rs2696609	43737040	0.953951	rs2696609	43737040	A	G	0.0139052	DBP	17:43737040:A:G	0.2396	CRHR1:RP11-105N13.4	00:00:00	ncRNA_intronic	2.576	NA	5	14
rs241024	20	17	44293205	rs2696609	43736763	0.953951	rs2696609	43736763	T	C	0.0134224	DBP	17:43736763:C:T	0.2396	CRHR1:RP11-105N13.4	00:00:00	ncRNA_intronic	7.619	NA	5	14
rs241026	20	17	44293205	rs2696609	43735555	0.953951	rs2696609	43735555	A	G	0.0138294	DBP	17:43735555:A:G	0.2396	CRHR1:RP11-105N13.4	00:00:00	ncRNA_intronic	3.636	NA	5	14
rs241027	20	17	44293205	rs2696609	43735478	0.953951	rs2696609	43735478	G	A	0.0138198	DBP	17:43735478:A:G	0.2396	CRHR1:RP11-105N13.4	00:00:00	ncRNA_intronic	3.464	NA	5	14
rs241028	20	17	44293205	rs2696609	43735276	0.953951	rs2696609	43735276	T	C	0.015171	DBP	17:43735276:C:T	0.2396	CRHR1:RP11-105N13.4	00:00:00	ncRNA_intronic	1.897	NA	5	14
rs241029	20	17	44293205	rs2696609	43734643	0.953951	rs2696609	43734643	C	T	0.0140105	DBP	17:43734643:C:T	0.2396	CRHR1:RP11-105N13.4	00:00:00	ncRNA_intronic	2.406	NA	5	14
rs241030	20	17	44293205	rs2696609	43734503	0.953951	rs2696609	43734503	G	A	0.0139338	DBP	17:43734503:A:G	0.2396	CRHR1:RP11-105N13.4	00:00:00	ncRNA_intronic	1.63	NA	5	14
rs241031	20	17	44293205	rs2696609	43734304	0.953951	rs2696609	43734304	C	T	0.0140105	DBP	17:43734304:C:T	0.2396	CRHR1:RP11-105N13.4	00:00:00	ncRNA_intronic	3.018	NA	5	14
rs241032	20	17	44293205	rs2696609	43734145	0.953951	rs2696609	43734145	C	T	0.0140876	DBP	17:43734145:C:T	0.2396	CRHR1:RP11-105N13.4	00:00:00	ncRNA_intronic	10.66	NA	5	14
rs241033	20	17	44293205	rs2696609	43733983	0.953951	rs2696609	43733983	A	G	0.0132455	DBP	17:43733983:A:G	0.2396	CRHR1:RP11-105N13.4	00:00:00	ncRNA_intronic	7.521	NA	5	14
rs241035	20	17	44293205	rs2696609	43731896	0.953951	rs2696609	43731896	T	C	0.0138566	DBP	17:43731896:C:T	0.2396	CRHR1:RP11-105N13.4	00:00:00	ncRNA_intronic	3.708	NA	5	14
rs241036	20	17	44293205	rs2696609	43731719	0.953951	rs2696609	43731719	C	A	0.0138578	DBP	17:43731719:A:C	0.2396	CRHR1:RP11-105N13.4	00:00:00	ncRNA_intronic	10.65	NA	5	14
rs241037	20	17	44293205	rs2696609	43730636	0.953951	rs2696609	43730636	T	G	0.013041	DBP	17:43730636:G:T	0.2396	CRHR1:RP11-105N13.4	00:00:00	ncRNA_intronic	0.032	NA	5	14
rs241038	20	17	44293205	rs2696609	43730598	0.953951	rs2696609	43730598	A	G	0.0138566	DBP	17:43730598:A:G	0.2396	CRHR1:RP11-105N13.4	00:00:00	ncRNA_intronic	2.082	NA	5	14
rs241041	20	17	44293205	rs2696609	43713925	0.953951	rs2696609	43713925	G	A	0.0137042	DBP	17:43713925:A:G	0.2396	CRHR1-IT1:CRHR1:RP11-105N13.4	00:00:00	ncRNA_exonic	0.354	NA	4	4
rs241042	20	17	44293205	rs2696609	43712657	0.953951	rs2696609	43712657	C	T	0.0137699	DBP	17:43712657:C:T	0.2396	CRHR1-IT1:CRHR1:RP11-105N13.4	00:00:00	ncRNA_intronic	2.423	NA	4	5
rs241044	20	17	44293205	rs2696609	43712464	0.953951	rs2696609	43712464	A	G	0.0137805	DBP	17:43712464:A:G	0.2396	CRHR1-IT1:CRHR1:RP11-105N13.4	00:00:00	ncRNA_intronic	5.062	NA	4	5
rs241045	20	17	44293205	rs2696609	43712337	0.953951	rs2696609	43712337	T	C	0.0138489	DBP	17:43712337:C:T	0.2396	CRHR1-IT1:CRHR1:RP11-105N13.4	00:00:00	ncRNA_intronic	1.364	NA	4	5
rs242559	20	17	44293205	rs2696609	44025888	0.898992	rs2696609	44025888	C	A	0.0161294	DBP	17:44025888:A:C	0.2505	MAPT	0	intronic	1.461	1b	2	14
rs242561	20	17	44293205	rs2696609	44026548	0.953951	rs2696609	44026548	T	C	0.0132649	DBP	17:44026548:C:T	0.2396	MAPT	0	intronic	17.47	NA	1	12
rs2435200	20	17	44071851	rs2435200	44071851	1	rs2696609	44071851	A	G	0.0424286	DBP	17:44071851:A:G	0.4394	MAPT	0	intronic	0.054	6	4	15
rs2435204	20	17	44293205	rs2696609	43988205	0.9433	rs2696609	43988205	G	A	0.0243398	DBP	17:43988205:A:G	0.2416	MAPT	0	intronic	0.273	5	5	14
rs2532229	20	17	44293205	rs2696609	44277265	0.953729	rs2696609	44277265	C	A	0.00931209	DBP	17:44277265:A:C	0.2416	KANSL1	0	intronic	9.096	NA	5	5
rs2532233	20	17	44293205	rs2696609	44273218	0.948641	rs2696609	44273218	T	C	0.00721917	DBP	17:44273218:C:T	0.2425	KANSL1:KANSL1-AS1	00:00:00	ncRNA_intronic	6.979	NA	2	5
rs2532276	20	17	44293205	rs2696609	44246624	0.938453	rs2696609	44246624	A	C	0.00881803	DBP	17:44246624:A:C	0.2425	KANSL1	0	intronic	3.249	NA	4	5
rs2532307	20	17	44293205	rs2696609	44221350	0.958962	rs2696609	44221350	A	G	0.0128424	DBP	17:44221350:A:G	0.2406	KANSL1	0	intronic	5.229	NA	2	5
rs2532329	20	17	44293205	rs2696609	44350090	0.878464	rs2696609	44350090	A	G	0.00783453	DBP	17:44350090:A:G	0.2515	ARL17B	2059	intergenic	3.086	NA	5	15
rs2532363	20	17	44293205	rs2696609	44333423	0.938178	rs2696609	44333423	T	G	0.00625872	DBP	17:44333423:G:T	0.2406	RP11-259G18.3	3493	intergenic	0.045	NA	5	15
rs2532418	20	17	44293205	rs2696609	44288579	0.953729	rs2696609	44288579	C	T	0.00665781	DBP	17:44288579:C:T	0.2416	KANSL1	0	intronic	7.74	NA	4	5
rs2668622	20	17	44293205	rs2696609	44352131	0.866454	rs2696609	44352131	T	G	0.0120951	DBP	17:44352131:G:T	0.2515	ARL17B	18	downstream	11.28	6	5	15
rs2668662	20	17	44293205	rs2696609	44290759	0.958962	rs2696609	44290759	C	T	0.00713198	DBP	17:44290759:C:T	0.2406	KANSL1	0	intronic	3.258	NA	4	5
rs2668665	20	17	44293205	rs2696609	44290047	0.953729	rs2696609	44290047	A	G	0.00764419	DBP	17:44290047:A:G	0.2416	KANSL1	0	intronic	1.878	NA	2	5
rs2668670	20	17	44293205	rs2696609	44289628	0.953729	rs2696609	44289628	C	A	0.00771564	DBP	17:44289628:A:C	0.2416	KANSL1	0	intronic	2.362	NA	4	5
rs2668692	20	17	44293205	rs2696609	44293020	0.958884	rs2696609	44293020	A	G	0.0121864	DBP	17:44293020:A:G	0.2425	KANSL1	0	intronic	10.28	NA	4	5
rs2668694	20	17	44293205	rs2696609	44292319	0.953729	rs2696609	44292319	C	T	0.00804314	DBP	17:44292319:C:T	0.2416	KANSL1	0	intronic	15	NA	4	5
rs2668695	20	17	44293205	rs2696609	44292126	0.958962	rs2696609	44292126	C	T	0.00771974	DBP	17:44292126:C:T	0.2406	KANSL1	0	intronic	2.779	NA	4	5
rs2696524	20	17	44293205	rs2696609	44356793	0.928025	rs2696609	44356793	G	A	0.0123188	DBP	17:44356793:A:G	0.2386	ARL17B	0	intronic	1.454	NA	5	15
rs2696532	20	17	44293205	rs2696609	44355602	0.918102	rs2696609	44355602	G	A	0.0141996	DBP	17:44355602:A:G	0.2366	ARL17B	0	intronic	0.835	NA	5	15
rs2696566	20	17	44293205	rs2696609	44266531	0.958962	rs2696609	44266531	A	G	0.00671678	DBP	17:44266531:A:G	0.2406	KANSL1	0	intronic	6.188	NA	1	7
rs2696608	20	17	44293205	rs2696609	44293671	0.810924	rs2696609	44293671	G	A	0.0208329	DBP	17:44293671:A:G	0.2097	KANSL1	0	intronic	0.291	NA	4	5
rs2696609	20	17	44293205	rs2696609	44293205	1	rs2696609	44293205	G	A	0.00362108	DBP	17:44293205:A:G	0.2485	KANSL1	0	intronic	0.723	NA	4	5
rs2696610	20	17	44293205	rs2696609	44291820	0.958962	rs2696609	44291820	G	A	0.00713198	DBP	17:44291820:A:G	0.2406	KANSL1	0	intronic	4.926	NA	4	5
rs2732601	20	17	44293205	rs2696609	44291479	0.958962	rs2696609	44291479	A	G	0.00713501	DBP	17:44291479:A:G	0.2406	KANSL1	0	intronic	14.68	NA	4	5
rs2732605	20	17	44293205	rs2696609	44291381	0.948607	rs2696609	44291381	G	A	0.00655499	DBP	17:44291381:A:G	0.2406	KANSL1	0	intronic	1.888	NA	4	5
rs2732606	20	17	44293205	rs2696609	44291365	0.958962	rs2696609	44291365	T	C	0.00780773	DBP	17:44291365:C:T	0.2406	KANSL1	0	intronic	1.453	NA	4	5
rs2732628	20	17	44293205	rs2696609	44288284	0.832376	rs2696609	44288284	A	G	0.022354	DBP	17:44288284:A:G	0.2117	KANSL1	0	intronic	3.233	1f	4	5
rs2732629	20	17	44293205	rs2696609	44289101	0.943695	rs2696609	44289101	G	A	0.0081667	DBP	17:44289101:A:G	0.2435	KANSL1	0	intronic	11.81	1f	4	5
rs2732705	20	17	44293205	rs2696609	44351929	0.912751	rs2696609	44351929	G	T	0.0112276	DBP	17:44351929:G:T	0.2435	ARL17B	220	downstream	11.74	NA	5	15
rs2732706	20	17	44293205	rs2696609	44351686	0.908032	rs2696609	44351686	T	C	0.00977618	DBP	17:44351686:C:T	0.2445	ARL17B	463	downstream	12.36	NA	5	15
rs28364021	20	17	44293205	rs2696609	43912282	0.953951	rs2696609	43912282	T	C	0.0102798	DBP	17:43912282:C:T	0.2396	CRHR1	0	UTR3	1.179	4	5	15
rs28364023	20	17	44293205	rs2696609	43894159	0.953951	rs2696609	43894159	T	C	0.0101096	DBP	17:43894159:C:T	0.2396	CRHR1	0	intronic	0.095	5	5	15
rs28364025	20	17	44293205	rs2696609	43894102	0.953951	rs2696609	43894102	C	T	0.0103586	DBP	17:43894102:C:T	0.2396	CRHR1	0	intronic	0.129	5	5	15
rs2838	20	17	44293205	rs2696609	44141347	0.958962	rs2696609	44141347	G	A	0.0127414	DBP	17:44141347:A:G	0.2406	KANSL1	0	intronic	8.011	6	4	5
rs28416808	20	17	44293205	rs2696609	44021218	0.948737	rs2696609	44021218	T	C	0.0107937	DBP	17:44021218:C:T	0.2406	MAPT	0	intronic	5.606	5	4	14
rs28439143	20	17	44293205	rs2696609	43987723	0.953951	rs2696609	43987723	A	G	0.0124605	DBP	17:43987723:A:G	0.2396	MAPT:RP11-669E14.4	00:00:00	ncRNA_intronic	9.325	6	5	14
rs28439278	20	17	44293205	rs2696609	43838071	0.953951	rs2696609	43838071	T	C	0.0130233	DBP	17:43838071:C:T	0.2396	CRHR1:RP11-105N13.4	00:00:00	ncRNA_intronic	0.25	6	5	14
rs2864087	20	17	44293205	rs2696609	43807063	0.953951	rs2696609	43807063	T	C	0.0118274	DBP	17:43807063:C:T	0.2396	CRHR1:RP11-105N13.4	00:00:00	ncRNA_intronic	5.451	NA	7	14
rs2873268	20	17	44293205	rs2696609	43930955	0.953951	rs2696609	43930955	A	G	0.0113826	DBP	17:43930955:A:G	0.2396	MAPT-AS1	0	ncRNA_intronic	3.423	7	5	14
rs2873269	20	17	44293205	rs2696609	43931122	0.953951	rs2696609	43931122	T	C	0.0113247	DBP	17:43931122:C:T	0.2396	MAPT-AS1	0	ncRNA_intronic	4.123	6	5	14
rs2902661	20	17	44293205	rs2696609	43807099	0.953951	rs2696609	43807099	A	G	0.0118274	DBP	17:43807099:A:G	0.2396	CRHR1:RP11-105N13.4	00:00:00	ncRNA_intronic	8.414	NA	7	14
rs2902662	20	17	44293205	rs2696609	43806925	0.953951	rs2696609	43806925	A	G	0.0115142	DBP	17:43806925:A:G	0.2396	CRHR1:RP11-105N13.4	00:00:00	ncRNA_intronic	10.85	NA	7	14
rs2942166	20	17	44293205	rs2696609	43715427	0.948607	rs2696609	43715427	C	T	0.015535	DBP	17:43715427:C:T	0.2406	CRHR1-IT1:CRHR1:RP11-105N13.4	00:00:00	ncRNA_intronic	0.231	NA	4	5
rs2942167	20	17	44293205	rs2696609	43715018	0.953951	rs2696609	43715018	C	T	0.0137042	DBP	17:43715018:C:T	0.2396	CRHR1-IT1:CRHR1:RP11-105N13.4	00:00:00	ncRNA_exonic	3.48	NA	4	5
rs2942168	20	17	44293205	rs2696609	43714850	0.953951	rs2696609	43714850	A	G	0.0130222	DBP	17:43714850:A:G	0.2396	CRHR1-IT1:CRHR1:RP11-105N13.4	00:00:00	ncRNA_exonic	5.087	1f	4	4
rs2942170	20	17	44293205	rs2696609	43711312	0.953951	rs2696609	43711312	T	C	0.0140844	DBP	17:43711312:C:T	0.2396	CRHR1-IT1:CRHR1:RP11-105N13.4	00:00:00	ncRNA_intronic	2.047	NA	4	5
rs3087534	20	17	44293205	rs2696609	44198806	0.958962	rs2696609	44198806	C	T	0.0116098	DBP	17:44198806:C:T	0.2406	KANSL1	0	intronic	6.72	2a	2	7
rs3108317	20	17	44293205	rs2696609	43719870	0.953951	rs2696609	43719870	A	G	0.0137197	DBP	17:43719870:A:G	0.2396	CRHR1-IT1:CRHR1:RP11-105N13.4	00:00:00	ncRNA_intronic	0.185	NA	5	5
rs34008514	20	17	44293205	rs2696609	43834314	0.953951	rs2696609	43834314	G	A	0.0120509	DBP	17:43834314:A:G	0.2396	CRHR1:RP11-105N13.4	00:00:00	ncRNA_intronic	2.158	5	5	14
rs34043286	20	17	44293205	rs2696609	44117119	0.958962	rs2696609	44117119	G	A	0.014339	DBP	17:44117119:A:G	0.2406	KANSL1	0	exonic	21	4	4	4
rs34097347	20	17	44293205	rs2696609	43949448	0.953951	rs2696609	43949448	A	C	0.00892249	DBP	17:43949448:A:C	0.2396	MAPT-AS1	0	ncRNA_intronic	0.281	1f	5	14
rs3418	20	17	44293205	rs2696609	43723462	0.953951	rs2696609	43723462	T	C	0.0137381	DBP	17:43723462:C:T	0.2396	CRHR1-IT1:CRHR1:RP11-105N13.4	00:00:00	ncRNA_exonic	3.497	NA	5	15
rs34195569	20	17	44293205	rs2696609	43833921	0.953951	rs2696609	43833921	A	G	0.0120497	DBP	17:43833921:A:G	0.2396	CRHR1:RP11-105N13.4	00:00:00	ncRNA_intronic	2.337	5	5	14
rs34283254	20	17	44293205	rs2696609	43902861	0.953951	rs2696609	43902861	A	C	0.0102041	DBP	17:43902861:A:C	0.2396	CRHR1	0	exonic	1.015	5	5	14
rs34303488	20	17	44293205	rs2696609	43848181	0.953951	rs2696609	43848181	T	C	0.0131748	DBP	17:43848181:C:T	0.2396	CRHR1:RP11-105N13.4	00:00:00	ncRNA_intronic	5.185	3a	2	14
rs34416056	20	17	44293205	rs2696609	43951220	0.953951	rs2696609	43951220	G	T	0.0119593	DBP	17:43951220:G:T	0.2396	MAPT-AS1	0	ncRNA_intronic	4.731	2b	2	14
rs34579278	20	17	44293205	rs2696609	43833981	0.953951	rs2696609	43833981	G	A	0.0119841	DBP	17:43833981:A:G	0.2396	CRHR1:RP11-105N13.4	00:00:00	ncRNA_intronic	3.424	5	5	14
rs34579536	20	17	44293205	rs2696609	44108906	0.958962	rs2696609	44108906	G	A	0.0134534	DBP	17:44108906:A:G	0.2406	KANSL1	0	exonic	14.36	3a	3	4
rs34739559	20	17	44293205	rs2696609	43949342	0.943521	rs2696609	43949342	A	G	0.0131066	DBP	17:43949342:A:G	0.2396	MAPT-AS1	0	ncRNA_intronic	1.756	5	5	14
rs35282504	20	17	44293205	rs2696609	43832618	0.953951	rs2696609	43832618	A	G	0.0119817	DBP	17:43832618:A:G	0.2396	CRHR1:RP11-105N13.4	00:00:00	ncRNA_intronic	3.509	5	5	14
rs35631660	20	17	44293205	rs2696609	43832337	0.953951	rs2696609	43832337	G	A	0.0117951	DBP	17:43832337:A:G	0.2396	CRHR1:RP11-105N13.4	00:00:00	ncRNA_intronic	1.303	7	5	14
rs35833914	20	17	44293205	rs2696609	44110541	0.958962	rs2696609	44110541	A	G	0.013269	DBP	17:44110541:A:G	0.2406	KANSL1	0	exonic	13.15	5	3	4
rs35879086	20	17	44293205	rs2696609	43830382	0.953951	rs2696609	43830382	A	G	0.0116098	DBP	17:43830382:A:G	0.2396	CRHR1:RP11-105N13.4	00:00:00	ncRNA_intronic	2.132	7	5	14
rs36076725	20	17	44293205	rs2696609	44110532	0.958962	rs2696609	44110532	A	G	0.013269	DBP	17:44110532:A:G	0.2406	KANSL1	0	exonic	14.41	5	3	4
rs365825	20	17	44293205	rs2696609	43705601	0.943458	rs2696609	43705601	G	A	0.0126185	DBP	17:43705601:A:G	0.2416	CRHR1-IT1:CRHR1:RP11-105N13.4	00:00:00	ncRNA_intronic	3.201	NA	4	5
rs366858	20	17	44293205	rs2696609	43726588	0.953951	rs2696609	43726588	T	C	0.0138304	DBP	17:43726588:C:T	0.2396	CRHR1:RP11-105N13.4	00:00:00	ncRNA_intronic	15.14	1f	5	15
rs376120	20	17	44293205	rs2696609	43705518	0.953951	rs2696609	43705518	G	A	0.0141491	DBP	17:43705518:A:G	0.2396	CRHR1-IT1:CRHR1:RP11-105N13.4	00:00:00	ncRNA_intronic	2.004	NA	4	5
rs3785884	20	17	44293205	rs2696609	44057595	0.907925	rs2696609	44057595	A	G	0.00886187	DBP	17:44057595:A:G	0.2505	MAPT	0	intronic	0.037	5	4	15
rs383241	20	17	44293205	rs2696609	43705356	0.953951	rs2696609	43705356	A	G	0.0141621	DBP	17:43705356:A:G	0.2396	CRHR1-IT1:CRHR1:RP11-105N13.4	00:00:00	ncRNA_intronic	1.367	NA	4	5
rs385691	20	17	44293205	rs2696609	43726125	0.953951	rs2696609	43726125	C	A	0.0137718	DBP	17:43726125:A:C	0.2396	CRHR1:RP11-105N13.4	00:00:00	ncRNA_intronic	1.6	NA	5	15
rs3885074	20	17	44293205	rs2696609	43902738	0.953951	rs2696609	43902738	A	C	0.0104942	DBP	17:43902738:A:C	0.2396	CRHR1	0	intronic	2.739	NA	5	14
rs3885075	20	17	44293205	rs2696609	43902799	0.953951	rs2696609	43902799	G	A	0.0104856	DBP	17:43902799:A:G	0.2396	CRHR1	0	intronic	0.492	NA	5	14
rs389217	20	17	44293205	rs2696609	43717131	0.953951	rs2696609	43717131	T	C	0.0136517	DBP	17:43717131:C:T	0.2396	CRHR1-IT1:CRHR1:RP11-105N13.4	00:00:00	ncRNA_intronic	10.42	NA	4	5
rs389978	20	17	44293205	rs2696609	43717415	0.948607	rs2696609	43717415	G	A	0.00987347	DBP	17:43717415:A:G	0.2406	CRHR1-IT1:CRHR1:RP11-105N13.4	00:00:00	ncRNA_intronic	0.353	7	4	5
rs3912060	20	17	44293205	rs2696609	44165435	0.953951	rs2696609	44165435	T	C	0.0135595	DBP	17:44165435:C:T	0.2396	KANSL1	0	intronic	0.275	NA	4	5
rs3912061	20	17	44293205	rs2696609	44165098	0.958962	rs2696609	44165098	T	C	0.012409	DBP	17:44165098:C:T	0.2406	KANSL1	0	intronic	0.013	NA	4	5
rs3912062	20	17	44293205	rs2696609	44165069	0.958962	rs2696609	44165069	G	A	0.0124023	DBP	17:44165069:A:G	0.2406	KANSL1	0	intronic	0.295	NA	4	5
rs3912063	20	17	44293205	rs2696609	44165049	0.958962	rs2696609	44165049	G	A	0.0132455	DBP	17:44165049:A:G	0.2406	KANSL1	0	intronic	4.259	NA	4	5
rs3919455	20	17	44293205	rs2696609	43953707	0.953951	rs2696609	43953707	T	C	0.012094	DBP	17:43953707:C:T	0.2396	MAPT-AS1	0	ncRNA_intronic	0.899	NA	7	14
rs393152	20	17	44293205	rs2696609	43719143	0.943458	rs2696609	43719143	G	A	0.0121945	DBP	17:43719143:A:G	0.2416	CRHR1-IT1:CRHR1:RP11-105N13.4	00:00:00	ncRNA_exonic	7.184	1f	5	5
rs393675	20	17	44293205	rs2696609	43723605	0.953951	rs2696609	43723605	C	T	0.013742	DBP	17:43723605:C:T	0.2396	CRHR1-IT1:CRHR1:RP11-105N13.4	00:00:00	ncRNA_exonic	10.3	NA	5	15
rs396593	20	17	44293205	rs2696609	43707955	0.953951	rs2696609	43707955	A	C	0.0141621	DBP	17:43707955:A:C	0.2396	CRHR1-IT1:CRHR1:RP11-105N13.4	00:00:00	ncRNA_exonic	0.484	NA	4	4
rs4074462	20	17	44293205	rs2696609	43855228	0.948737	rs2696609	43855228	T	G	0.0106502	DBP	17:43855228:G:T	0.2406	CRHR1:RP11-105N13.4	00:00:00	ncRNA_intronic	6.564	1d	5	14
rs41280116	20	17	44293205	rs2696609	43902842	0.953951	rs2696609	43902842	T	C	0.0104942	DBP	17:43902842:C:T	0.2396	CRHR1	0	intronic	3.905	5	5	14
rs41280118	20	17	44293205	rs2696609	43903089	0.953951	rs2696609	43903089	T	C	0.0105538	DBP	17:43903089:C:T	0.2396	CRHR1	0	intronic	1.004	5	5	14
rs413519	20	17	44293205	rs2696609	43685826	0.958962	rs2696609	43685826	G	A	0.0142626	DBP	17:43685826:A:G	0.2406	RPS26P8	82	upstream	2.393	NA	14	15
rs41374248	20	17	44293205	rs2696609	44120442	0.958962	rs2696609	44120442	G	A	0.0138026	DBP	17:44120442:A:G	0.2406	KANSL1	0	intronic	4.559	5	4	4
rs413778	20	17	44293205	rs2696609	43716885	0.953951	rs2696609	43716885	G	A	0.0139963	DBP	17:43716885:A:G	0.2396	CRHR1-IT1:CRHR1:RP11-105N13.4	00:00:00	ncRNA_exonic	4.949	NA	4	5
rs41382552	20	17	44293205	rs2696609	44118999	0.958962	rs2696609	44118999	G	A	0.0141857	DBP	17:44118999:A:G	0.2406	KANSL1	0	intronic	4.257	7	4	4
rs413844	20	17	44293205	rs2696609	43729384	0.953951	rs2696609	43729384	A	G	0.0139854	DBP	17:43729384:A:G	0.2396	CRHR1:RP11-105N13.4	00:00:00	ncRNA_intronic	0.769	6	5	14
rs41384744	20	17	44293205	rs2696609	44137070	0.958962	rs2696609	44137070	G	A	0.0126688	DBP	17:44137070:A:G	0.2406	KANSL1	0	intronic	0.322	3a	4	5
rs413917	20	17	44293205	rs2696609	43723189	0.953951	rs2696609	43723189	A	G	0.0152002	DBP	17:43723189:A:G	0.2396	CRHR1-IT1:CRHR1:RP11-105N13.4	00:00:00	ncRNA_exonic	5.069	1f	5	15
rs41437445	20	17	44293205	rs2696609	44116238	0.958962	rs2696609	44116238	A	G	0.0138055	DBP	17:44116238:A:G	0.2406	KANSL1	0	intronic	16.83	7	4	4
rs41457044	20	17	44293205	rs2696609	43911424	0.943622	rs2696609	43911424	T	C	0.0106765	DBP	17:43911424:C:T	0.2396	CRHR1	0	intronic	3.162	5	5	15
rs415430	20	17	44293205	rs2696609	44859144	0.784738	rs2696609	44859144	C	T	0.0284672	DBP	17:44859144:C:T	0.2167	WNT3	0	intronic	2.655	NA	5	14
rs417968	20	17	44293205	rs2696609	43728376	0.797993	rs2696609	43728376	G	A	0.0100438	DBP	17:43728376:A:G	0.2763	CRHR1:RP11-105N13.4	00:00:00	ncRNA_intronic	7.968	NA	4	15
rs422112	20	17	44293205	rs2696609	43728137	0.953951	rs2696609	43728137	A	G	0.0147633	DBP	17:43728137:A:G	0.2396	CRHR1:RP11-105N13.4	00:00:00	ncRNA_intronic	1.811	1f	5	15
rs4277389	20	17	44293205	rs2696609	43895653	0.953951	rs2696609	43895653	G	A	0.00978424	DBP	17:43895653:A:G	0.2396	CRHR1	0	intronic	1.876	1f	5	15
rs4283261	20	17	44293205	rs2696609	44089921	0.953729	rs2696609	44089921	T	C	0.0122632	DBP	17:44089921:C:T	0.2416	MAPT	0	intronic	2.371	5	2	15
rs4306559	20	17	44293205	rs2696609	44090236	0.958962	rs2696609	44090236	C	T	0.0129949	DBP	17:44090236:C:T	0.2406	MAPT	0	intronic	5.072	5	4	15
rs430685	20	17	44293205	rs2696609	44859148	0.784738	rs2696609	44859148	T	C	0.0238724	DBP	17:44859148:C:T	0.2167	WNT3	0	intronic	5.372	NA	5	14
rs4309444	20	17	44293205	rs2696609	43895797	0.953951	rs2696609	43895797	C	T	0.00995779	DBP	17:43895797:C:T	0.2396	CRHR1	0	intronic	9.226	5	5	15
rs4327090	20	17	44293205	rs2696609	43902541	0.768198	rs2696609	43902541	G	A	0.0354934	DBP	17:43902541:A:G	0.2038	CRHR1	0	intronic	6.761	5	5	14
rs4327091	20	17	44293205	rs2696609	44021717	0.953951	rs2696609	44021717	A	G	0.0117081	DBP	17:44021717:A:G	0.2396	MAPT	0	intronic	0.278	1f	4	14
rs4335809	20	17	44293205	rs2696609	43902216	0.953951	rs2696609	43902216	T	C	0.010376	DBP	17:43902216:C:T	0.2396	CRHR1	0	intronic	3.622	5	5	14
rs4340365	20	17	44293205	rs2696609	43930980	0.953951	rs2696609	43930980	T	C	0.0113826	DBP	17:43930980:C:T	0.2396	MAPT-AS1	0	ncRNA_intronic	4.253	7	5	14
rs4341787	20	17	44293205	rs2696609	43902505	0.948607	rs2696609	43902505	T	C	0.0115355	DBP	17:43902505:C:T	0.2406	CRHR1	0	intronic	19.39	5	5	14
rs434428	20	17	44293205	rs2696609	43725684	0.953951	rs2696609	43725684	A	G	0.0137632	DBP	17:43725684:A:G	0.2396	CRHR1:RP11-105N13.4	00:00:00	ncRNA_intronic	5.872	1f	5	15
rs434598	20	17	44293205	rs2696609	43725762	0.953951	rs2696609	43725762	A	G	0.0137632	DBP	17:43725762:A:G	0.2396	CRHR1:RP11-105N13.4	00:00:00	ncRNA_intronic	0.606	5	5	15
rs434805	20	17	44293205	rs2696609	43718336	0.943458	rs2696609	43718336	C	T	0.0121426	DBP	17:43718336:C:T	0.2416	CRHR1-IT1:CRHR1:RP11-105N13.4	00:00:00	ncRNA_exonic	0.111	NA	5	5
rs434971	20	17	44293205	rs2696609	43725992	0.953951	rs2696609	43725992	A	G	0.0137632	DBP	17:43725992:A:G	0.2396	CRHR1:RP11-105N13.4	00:00:00	ncRNA_intronic	5.203	4	5	15
rs436667	20	17	44293205	rs2696609	43709415	0.953951	rs2696609	43709415	T	C	0.0141621	DBP	17:43709415:C:T	0.2396	CRHR1-IT1:CRHR1:RP11-105N13.4	00:00:00	ncRNA_intronic	6.134	1f	4	4
rs4371195	20	17	44293205	rs2696609	43986420	0.953951	rs2696609	43986420	G	A	0.0123899	DBP	17:43986420:A:G	0.2396	MAPT:RP11-669E14.4	00:00:00	ncRNA_intronic	0.094	5	2	14
rs4383188	20	17	44293205	rs2696609	44197603	0.958962	rs2696609	44197603	C	T	0.0127889	DBP	17:44197603:C:T	0.2406	KANSL1	0	intronic	4.019	1f	2	5
rs4390635	20	17	44293205	rs2696609	43809016	0.953951	rs2696609	43809016	T	C	0.0118274	DBP	17:43809016:C:T	0.2396	CRHR1:RP11-105N13.4	00:00:00	ncRNA_intronic	5.436	1f	8	9
rs439558	20	17	44293205	rs2696609	43717803	0.948607	rs2696609	43717803	C	T	0.0163891	DBP	17:43717803:C:T	0.2406	CRHR1-IT1:CRHR1:RP11-105N13.4	00:00:00	ncRNA_exonic	5.404	NA	1	5
rs439945	20	17	44293205	rs2696609	43726659	0.797993	rs2696609	43726659	A	C	0.0107948	DBP	17:43726659:A:C	0.2763	CRHR1:RP11-105N13.4	00:00:00	ncRNA_intronic	1.405	1f	5	15
rs4401083	20	17	44293205	rs2696609	43806015	0.953951	rs2696609	43806015	A	G	0.0119002	DBP	17:43806015:A:G	0.2396	CRHR1:RP11-105N13.4	00:00:00	ncRNA_intronic	0.424	1f	7	14
rs440778	20	17	44293205	rs2696609	43686420	0.958962	rs2696609	43686420	G	A	0.0135022	DBP	17:43686420:A:G	0.2406	RPS26P8	70	downstream	2.846	NA	14	15
rs444071	20	17	44293205	rs2696609	43707951	0.953951	rs2696609	43707951	T	C	0.0141621	DBP	17:43707951:C:T	0.2396	CRHR1-IT1:CRHR1:RP11-105N13.4	00:00:00	ncRNA_exonic	3.796	NA	4	4
rs4441322	20	17	44293205	rs2696609	43955030	0.953951	rs2696609	43955030	G	A	0.0118262	DBP	17:43955030:A:G	0.2396	MAPT-AS1	0	ncRNA_intronic	6.719	1f	9	14
rs4471723	20	17	44293205	rs2696609	44205690	0.927719	rs2696609	44205690	T	C	0.0210194	DBP	17:44205690:C:T	0.2465	KANSL1	0	intronic	1.641	6	2	5
rs4471726	20	17	44293205	rs2696609	43807134	0.953951	rs2696609	43807134	C	T	0.0118262	DBP	17:43807134:C:T	0.2396	CRHR1:RP11-105N13.4	00:00:00	ncRNA_intronic	4.354	1f	7	14
rs4479288	20	17	44293205	rs2696609	43793828	0.948607	rs2696609	43793828	A	G	0.0243769	DBP	17:43793828:A:G	0.2406	CRHR1:RP11-105N13.4	00:00:00	ncRNA_intronic	4.53	5	5	14
rs4479289	20	17	44293205	rs2696609	43793951	0.953951	rs2696609	43793951	A	G	0.0121195	DBP	17:43793951:A:G	0.2396	CRHR1:RP11-105N13.4	00:00:00	ncRNA_intronic	5.675	5	5	14
rs4479290	20	17	44293205	rs2696609	44021744	0.953951	rs2696609	44021744	C	T	0.0108627	DBP	17:44021744:C:T	0.2396	MAPT	0	intronic	1.274	5	4	14
rs4482334	20	17	44293205	rs2696609	43912830	0.953951	rs2696609	43912830	C	T	0.0108859	DBP	17:43912830:C:T	0.2396	CRHR1	0	UTR3	1.673	5	5	15
rs4486953	20	17	44293205	rs2696609	43763007	0.953951	rs2696609	43763007	C	T	0.0138721	DBP	17:43763007:C:T	0.2396	CRHR1:RP11-105N13.4	00:00:00	ncRNA_intronic	3.9	6	5	14
rs448830	20	17	44293205	rs2696609	43725212	0.953951	rs2696609	43725212	A	G	0.0136955	DBP	17:43725212:A:G	0.2396	CRHR1-IT1:CRHR1:RP11-105N13.4	00:00:00	ncRNA_exonic	0.419	NA	5	15
rs449501	20	17	44293205	rs2696609	43724555	0.953951	rs2696609	43724555	A	G	0.0154594	DBP	17:43724555:A:G	0.2396	CRHR1-IT1:CRHR1:RP11-105N13.4	00:00:00	ncRNA_exonic	0.543	NA	5	15
rs4523962	20	17	44293205	rs2696609	43902522	0.953951	rs2696609	43902522	A	G	0.0104353	DBP	17:43902522:A:G	0.2396	CRHR1	0	intronic	11.51	5	5	14
rs4525537	20	17	44293205	rs2696609	43912723	0.953951	rs2696609	43912723	C	T	0.0108859	DBP	17:43912723:C:T	0.2396	CRHR1	0	UTR3	9.437	4	5	15
rs453997	20	17	44293205	rs2696609	43727061	0.953951	rs2696609	43727061	T	C	0.0136028	DBP	17:43727061:C:T	0.2396	CRHR1:RP11-105N13.4	00:00:00	ncRNA_intronic	0.03	NA	5	15
rs4548919	20	17	44293205	rs2696609	44192395	0.958962	rs2696609	44192395	T	G	0.0114874	DBP	17:44192395:G:T	0.2406	KANSL1	0	intronic	1.049	6	5	5
rs455028	20	17	44293205	rs2696609	43726574	0.953951	rs2696609	43726574	C	T	0.0137718	DBP	17:43726574:C:T	0.2396	CRHR1:RP11-105N13.4	00:00:00	ncRNA_intronic	13.12	1f	5	15
rs4566211	20	17	44293205	rs2696609	43895696	0.953951	rs2696609	43895696	A	G	0.00974501	DBP	17:43895696:A:G	0.2396	CRHR1	0	intronic	0.716	1f	5	15
rs4566212	20	17	44293205	rs2696609	43895751	0.953951	rs2696609	43895751	A	G	0.00996696	DBP	17:43895751:A:G	0.2396	CRHR1	0	intronic	1.308	5	5	15
rs4569335	20	17	44293205	rs2696609	43811950	0.953951	rs2696609	43811950	C	A	0.0118262	DBP	17:43811950:A:C	0.2396	CRHR1:RP11-105N13.4:RP11-293E1.1	00:00:00	ncRNA_exonic	8.825	5	5	14
rs4581739	20	17	44293205	rs2696609	44204739	0.958962	rs2696609	44204739	C	T	0.0116098	DBP	17:44204739:C:T	0.2406	KANSL1	0	intronic	6.007	5	4	5
rs4606752	20	17	44293205	rs2696609	44192618	0.953951	rs2696609	44192618	G	A	0.00862463	DBP	17:44192618:A:G	0.2396	KANSL1	0	intronic	4.058	7	5	5
rs4608377	20	17	44293205	rs2696609	44113359	0.958962	rs2696609	44113359	C	T	0.0136702	DBP	17:44113359:C:T	0.2406	KANSL1	0	intronic	3.697	6	4	4
rs4609898	20	17	44293205	rs2696609	43794182	0.953951	rs2696609	43794182	A	G	0.011653	DBP	17:43794182:A:G	0.2396	CRHR1:RP11-105N13.4	00:00:00	ncRNA_intronic	3.572	6	5	14
rs4609899	20	17	44293205	rs2696609	43807113	0.953951	rs2696609	43807113	T	C	0.0118274	DBP	17:43807113:C:T	0.2396	CRHR1:RP11-105N13.4	00:00:00	ncRNA_intronic	2.361	3a	7	14
rs4617909	20	17	44293205	rs2696609	43806451	0.953951	rs2696609	43806451	T	C	0.0118274	DBP	17:43806451:C:T	0.2396	CRHR1:RP11-105N13.4	00:00:00	ncRNA_intronic	3.132	6	7	14
rs4627402	20	17	44293205	rs2696609	43932741	0.944026	rs2696609	43932741	T	C	0.00998787	DBP	17:43932741:C:T	0.2376	MAPT-AS1	0	ncRNA_intronic	2.492	5	5	14
rs4630591	20	17	44293205	rs2696609	44192568	0.795176	rs2696609	44192568	T	C	0.0333503	DBP	17:44192568:C:T	0.2078	KANSL1	0	intronic	0.795	6	5	5
rs4792824	20	17	44293205	rs2696609	43750910	0.836946	rs2696609	43750910	C	T	0.017167	DBP	17:43750910:C:T	0.2664	CRHR1:RP11-105N13.4	00:00:00	ncRNA_intronic	1.449	6	5	14
rs55638417	20	17	44293205	rs2696609	43900434	0.953951	rs2696609	43900434	G	A	0.0100152	DBP	17:43900434:A:G	0.2396	CRHR1	0	intronic	6.306	7	5	15
rs55645418	20	17	44293205	rs2696609	43832115	0.953951	rs2696609	43832115	G	A	0.0116014	DBP	17:43832115:A:G	0.2396	CRHR1:RP11-105N13.4	00:00:00	ncRNA_intronic	0.673	7	5	14
rs55646970	20	17	44293205	rs2696609	43938796	0.953951	rs2696609	43938796	G	A	0.0115142	DBP	17:43938796:A:G	0.2396	MAPT-AS1	0	ncRNA_intronic	6.223	5	5	14
rs55653657	20	17	44293205	rs2696609	43956778	0.953951	rs2696609	43956778	G	A	0.0121956	DBP	17:43956778:A:G	0.2396	MAPT-AS1	0	ncRNA_intronic	2.729	7	14	14
rs55653937	20	17	44293205	rs2696609	44316076	0.958753	rs2696609	44316076	T	G	0.00822186	DBP	17:44316076:G:T	0.2425	RP11-259G18.2	4895	intergenic	2.34	7	5	15
rs55653963	20	17	44293205	rs2696609	43799509	0.953951	rs2696609	43799509	C	A	0.0117227	DBP	17:43799509:A:C	0.2396	CRHR1:RP11-105N13.4	00:00:00	ncRNA_intronic	4.381	4	5	14
rs55657917	20	17	44293205	rs2696609	43844560	0.953951	rs2696609	43844560	G	T	0.0129739	DBP	17:43844560:G:T	0.2396	CRHR1:RP11-105N13.4	00:00:00	ncRNA_intronic	14.78	5	5	14
rs55660209	20	17	44293205	rs2696609	43932173	0.867977	rs2696609	43932173	G	A	0.0181604	DBP	17:43932173:A:G	0.2217	MAPT-AS1	0	ncRNA_intronic	5.09	6	5	14
rs55662347	20	17	44293205	rs2696609	44070545	0.958962	rs2696609	44070545	A	G	0.0132005	DBP	17:44070545:A:G	0.2406	MAPT	0	intronic	0.128	2b	4	15
rs55668363	20	17	44293205	rs2696609	43892788	0.881138	rs2696609	43892788	A	G	0.00770197	DBP	17:43892788:A:G	0.2247	CRHR1:RP11-105N13.4	00:00:00	ncRNA_intronic	0.697	4	5	14
rs55669046	20	17	44293205	rs2696609	43768501	0.953951	rs2696609	43768501	T	C	0.0138045	DBP	17:43768501:C:T	0.2396	CRHR1:RP11-105N13.4	00:00:00	ncRNA_intronic	1.94	5	7	13
rs55669501	20	17	44293205	rs2696609	44202564	0.958962	rs2696609	44202564	A	G	0.0116056	DBP	17:44202564:A:G	0.2406	KANSL1	0	intronic	9.115	4	4	5
rs55672516	20	17	44293205	rs2696609	44201680	0.958962	rs2696609	44201680	C	A	0.0116098	DBP	17:44201680:A:C	0.2406	KANSL1	0	intronic	5.14	5	4	5
rs55673092	20	17	44293205	rs2696609	43938882	0.953951	rs2696609	43938882	A	G	0.0115131	DBP	17:43938882:A:G	0.2396	MAPT-AS1	0	ncRNA_intronic	2.891	4	5	14
rs55673340	20	17	44293205	rs2696609	43948733	0.953951	rs2696609	43948733	T	C	0.0117154	DBP	17:43948733:C:T	0.2396	MAPT-AS1	0	ncRNA_intronic	2.74	7	5	14
rs55682376	20	17	44293205	rs2696609	43991888	0.953951	rs2696609	43991888	A	G	0.012145	DBP	17:43991888:A:G	0.2396	MAPT	0	intronic	1.095	4	4	14
rs55685451	20	17	44293205	rs2696609	44001957	0.953951	rs2696609	44001957	G	T	0.0111484	DBP	17:44001957:G:T	0.2396	MAPT	0	intronic	9.237	5	2	15
rs55686102	20	17	44293205	rs2696609	44202608	0.958962	rs2696609	44202608	T	C	0.0116056	DBP	17:44202608:C:T	0.2406	KANSL1	0	intronic	0.086	2b	4	5
rs55690782	20	17	44293205	rs2696609	44137311	0.958962	rs2696609	44137311	A	G	0.0129285	DBP	17:44137311:A:G	0.2406	KANSL1	0	intronic	1.175	5	4	5
rs55692232	20	17	44293205	rs2696609	44164323	0.958962	rs2696609	44164323	A	G	0.0123415	DBP	17:44164323:A:G	0.2406	KANSL1	0	intronic	0.746	7	4	5
rs55707339	20	17	44293205	rs2696609	43842462	0.948737	rs2696609	43842462	C	T	0.0136458	DBP	17:43842462:C:T	0.2406	CRHR1:RP11-105N13.4	00:00:00	ncRNA_intronic	5.777	6	5	14
rs55709241	20	17	44293205	rs2696609	44041101	0.958962	rs2696609	44041101	C	T	0.0130065	DBP	17:44041101:C:T	0.2406	MAPT	0	intronic	9.367	5	4	14
rs55711941	20	17	44293205	rs2696609	44040823	0.958962	rs2696609	44040823	T	C	0.0128861	DBP	17:44040823:C:T	0.2406	MAPT	0	intronic	1.243	5	4	14
rs55718212	20	17	44293205	rs2696609	43920411	0.953951	rs2696609	43920411	C	T	0.0107489	DBP	17:43920411:C:T	0.2396	MAPT-AS1	605	downstream	5.507	6	5	15
rs55719714	20	17	44293205	rs2696609	43939638	0.953951	rs2696609	43939638	A	G	0.0116299	DBP	17:43939638:A:G	0.2396	MAPT-AS1	0	ncRNA_intronic	2.246	3a	5	14
rs55721252	20	17	44293205	rs2696609	43958099	0.953951	rs2696609	43958099	C	T	0.0121956	DBP	17:43958099:C:T	0.2396	MAPT-AS1	0	ncRNA_intronic	4.424	7	9	14
rs55726761	20	17	44293205	rs2696609	44099669	0.958962	rs2696609	44099669	A	G	0.0136556	DBP	17:44099669:A:G	0.2406	MAPT	0	intronic	1.153	7	4	5
rs55736025	20	17	44293205	rs2696609	44072017	0.958962	rs2696609	44072017	A	C	0.0132271	DBP	17:44072017:A:C	0.2406	MAPT	0	intronic	7.965	7	4	15
rs55747440	20	17	44293205	rs2696609	43837115	0.953951	rs2696609	43837115	G	A	0.0129581	DBP	17:43837115:A:G	0.2396	CRHR1:RP11-105N13.4	00:00:00	ncRNA_intronic	9.098	4	5	14
rs55751924	20	17	44293205	rs2696609	43932155	0.953951	rs2696609	43932155	G	A	0.0119688	DBP	17:43932155:A:G	0.2396	MAPT-AS1	0	ncRNA_intronic	0.384	6	5	14
rs55760800	20	17	44293205	rs2696609	43996908	0.953951	rs2696609	43996908	G	T	0.011482	DBP	17:43996908:G:T	0.2396	MAPT	0	intronic	5.656	5	4	14
rs55767267	20	17	44293205	rs2696609	43960325	0.953951	rs2696609	43960325	C	T	0.0123358	DBP	17:43960325:C:T	0.2396	MAPT-AS1	0	ncRNA_intronic	5.792	5	7	14
rs55768605	20	17	44293205	rs2696609	43956734	0.953951	rs2696609	43956734	A	C	0.0118466	DBP	17:43956734:A:C	0.2396	MAPT-AS1	0	ncRNA_intronic	0.091	7	14	14
rs55779147	20	17	44293205	rs2696609	43894510	0.953951	rs2696609	43894510	A	G	0.0100503	DBP	17:43894510:A:G	0.2396	CRHR1	0	intronic	1.333	5	5	15
rs55780786	20	17	44293205	rs2696609	44209875	0.958962	rs2696609	44209875	C	T	0.0117987	DBP	17:44209875:C:T	0.2406	KANSL1	0	intronic	2.814	7	4	5
rs55780945	20	17	44293205	rs2696609	44040120	0.958962	rs2696609	44040120	T	C	0.0128178	DBP	17:44040120:C:T	0.2406	MAPT	0	intronic	2.309	7	4	14
rs55781174	20	17	44293205	rs2696609	43944158	0.953951	rs2696609	43944158	T	C	0.0117842	DBP	17:43944158:C:T	0.2396	MAPT-AS1	0	ncRNA_intronic	0.551	7	5	14
rs55787105	20	17	44293205	rs2696609	43853109	0.953951	rs2696609	43853109	A	G	0.0129781	DBP	17:43853109:A:G	0.2396	CRHR1:RP11-105N13.4	00:00:00	ncRNA_intronic	10.95	4	5	14
rs55787734	20	17	44293205	rs2696609	43799052	0.953951	rs2696609	43799052	G	A	0.0121968	DBP	17:43799052:A:G	0.2396	CRHR1:RP11-105N13.4	00:00:00	ncRNA_intronic	5.686	5	5	14
rs55788678	20	17	44293205	rs2696609	43992233	0.953951	rs2696609	43992233	T	C	0.0120765	DBP	17:43992233:C:T	0.2396	MAPT	0	intronic	2.103	7	4	14
rs55794067	20	17	44293205	rs2696609	44188764	0.958962	rs2696609	44188764	C	T	0.0114949	DBP	17:44188764:C:T	0.2406	KANSL1	0	intronic	4.413	6	5	5
rs55801356	20	17	44293205	rs2696609	43837237	0.953951	rs2696609	43837237	G	A	0.0129581	DBP	17:43837237:A:G	0.2396	CRHR1:RP11-105N13.4	00:00:00	ncRNA_intronic	7.008	3a	2	14
rs55810795	20	17	44293205	rs2696609	43992283	0.953951	rs2696609	43992283	G	A	0.0120134	DBP	17:43992283:A:G	0.2396	MAPT	0	intronic	0.147	7	4	14
rs55823844	20	17	44293205	rs2696609	43978320	0.953951	rs2696609	43978320	A	G	0.0120765	DBP	17:43978320:A:G	0.2396	MAPT	0	intronic	0.562	4	5	13
rs55831516	20	17	44293205	rs2696609	44148267	0.953729	rs2696609	44148267	T	C	0.0188098	DBP	17:44148267:C:T	0.2416	KANSL1	0	intronic	9.451	5	4	5
rs55838058	20	17	44293205	rs2696609	43798902	0.953951	rs2696609	43798902	T	C	0.0121876	DBP	17:43798902:C:T	0.2396	CRHR1:RP11-105N13.4	00:00:00	ncRNA_intronic	3.237	5	5	14
rs55849949	20	17	44293205	rs2696609	43853526	0.953951	rs2696609	43853526	G	A	0.0129084	DBP	17:43853526:A:G	0.2396	CRHR1:RP11-105N13.4	00:00:00	ncRNA_intronic	9.088	5	5	14
rs55849973	20	17	44293205	rs2696609	43792418	0.953951	rs2696609	43792418	C	T	0.0121299	DBP	17:43792418:C:T	0.2396	CRHR1:RP11-105N13.4	00:00:00	ncRNA_intronic	7.087	5	5	14
rs55864131	20	17	44293205	rs2696609	44163411	0.958962	rs2696609	44163411	C	T	0.0124683	DBP	17:44163411:C:T	0.2406	KANSL1	0	intronic	9.157	6	4	5
rs55865707	20	17	44293205	rs2696609	43908826	0.953951	rs2696609	43908826	G	T	0.0109218	DBP	17:43908826:G:T	0.2396	CRHR1	0	intronic	9.202	5	5	14
rs55874169	20	17	44293205	rs2696609	44014384	0.953951	rs2696609	44014384	A	G	0.0117408	DBP	17:44014384:A:G	0.2396	MAPT	0	intronic	0.104	4	5	14
rs55876817	20	17	44293205	rs2696609	43958139	0.953951	rs2696609	43958139	C	A	0.0121956	DBP	17:43958139:A:C	0.2396	MAPT-AS1	0	ncRNA_intronic	7.877	7	9	14
rs55877243	20	17	44293205	rs2696609	43969019	0.953951	rs2696609	43969019	C	T	0.0127231	DBP	17:43969019:C:T	0.2396	MAPT-AS1	0	ncRNA_intronic	5.878	7	5	14
rs55881134	20	17	44293205	rs2696609	44109248	0.958962	rs2696609	44109248	A	G	0.0132015	DBP	17:44109248:A:G	0.2406	KANSL1	0	intronic	4.913	5	3	4
rs55886302	20	17	44293205	rs2696609	43936011	0.953951	rs2696609	43936011	G	A	0.0113989	DBP	17:43936011:A:G	0.2396	MAPT-AS1	0	ncRNA_intronic	4.328	5	5	14
rs55888391	20	17	44293205	rs2696609	43938107	0.953951	rs2696609	43938107	G	A	0.0113989	DBP	17:43938107:A:G	0.2396	MAPT-AS1	0	ncRNA_intronic	11.3	5	5	14
rs55893711	20	17	44293205	rs2696609	44119320	0.958962	rs2696609	44119320	T	C	0.014994	DBP	17:44119320:C:T	0.2406	KANSL1	0	intronic	0.55	7	4	4
rs55894109	20	17	44293205	rs2696609	43957221	0.953951	rs2696609	43957221	T	C	0.0122048	DBP	17:43957221:C:T	0.2396	MAPT-AS1	0	ncRNA_intronic	0.31	7	14	14
rs55895732	20	17	44293205	rs2696609	43968937	0.953951	rs2696609	43968937	C	T	0.0127231	DBP	17:43968937:C:T	0.2396	MAPT-AS1	0	ncRNA_intronic	2.746	7	5	14
rs55896111	20	17	44293205	rs2696609	43799048	0.953951	rs2696609	43799048	A	G	0.0121876	DBP	17:43799048:A:G	0.2396	CRHR1:RP11-105N13.4	00:00:00	ncRNA_intronic	4.29	5	5	14
rs55900347	20	17	44293205	rs2696609	44176092	0.958962	rs2696609	44176092	A	G	0.0121657	DBP	17:44176092:A:G	0.2406	KANSL1	0	intronic	0.606	5	5	5
rs55905252	20	17	44293205	rs2696609	43955365	0.953951	rs2696609	43955365	A	C	0.0120263	DBP	17:43955365:A:C	0.2396	MAPT-AS1	0	ncRNA_intronic	1.415	5	9	14
rs55907036	20	17	44293205	rs2696609	44042366	0.958962	rs2696609	44042366	A	G	0.0129539	DBP	17:44042366:A:G	0.2406	MAPT	0	intronic	3.572	5	4	14
rs55909047	20	17	44293205	rs2696609	44209957	0.958962	rs2696609	44209957	G	A	0.0117987	DBP	17:44209957:A:G	0.2406	KANSL1	0	intronic	6.02	7	4	5
rs55915917	20	17	44293205	rs2696609	43892784	0.875324	rs2696609	43892784	G	T	0.00689526	DBP	17:43892784:G:T	0.2256	CRHR1:RP11-105N13.4	00:00:00	ncRNA_intronic	0.572	4	5	14
rs55927630	20	17	44293205	rs2696609	43772407	0.953951	rs2696609	43772407	T	C	0.0137564	DBP	17:43772407:C:T	0.2396	CRHR1:RP11-105N13.4	00:00:00	ncRNA_intronic	0.344	7	13	14
rs55929431	20	17	44293205	rs2696609	44000202	0.953951	rs2696609	44000202	A	G	0.0116014	DBP	17:44000202:A:G	0.2396	MAPT	0	intronic	0.461	5	4	15
rs55933304	20	17	44293205	rs2696609	43992305	0.953951	rs2696609	43992305	A	G	0.0120765	DBP	17:43992305:A:G	0.2396	MAPT	0	intronic	2.568	7	4	14
rs55937610	20	17	44293205	rs2696609	43960283	0.953951	rs2696609	43960283	G	A	0.0123358	DBP	17:43960283:A:G	0.2396	MAPT-AS1	0	ncRNA_intronic	0.594	5	7	14
rs55942528	20	17	44293205	rs2696609	43932028	0.953951	rs2696609	43932028	G	A	0.0113771	DBP	17:43932028:A:G	0.2396	MAPT-AS1	0	ncRNA_intronic	0.086	5	5	14
rs55943044	20	17	44293205	rs2696609	43872228	0.953951	rs2696609	43872228	A	G	0.0121715	DBP	17:43872228:A:G	0.2396	CRHR1:RP11-105N13.4	00:00:00	ncRNA_intronic	0.478	4	5	14
rs55943606	20	17	44293205	rs2696609	43968874	0.953951	rs2696609	43968874	G	A	0.0127231	DBP	17:43968874:A:G	0.2396	MAPT-AS1	0	ncRNA_intronic	2.462	6	5	14
rs55943825	20	17	44293205	rs2696609	43924776	0.953951	rs2696609	43924776	T	C	0.0113148	DBP	17:43924776:C:T	0.2396	MAPT-AS1	0	ncRNA_intronic	0.414	5	5	15
rs55944735	20	17	44293205	rs2696609	43958172	0.953951	rs2696609	43958172	G	A	0.0125349	DBP	17:43958172:A:G	0.2396	MAPT-AS1	0	ncRNA_intronic	0.388	7	9	14
rs55946323	20	17	44293205	rs2696609	44031946	0.948973	rs2696609	44031946	G	A	0.0121496	DBP	17:44031946:A:G	0.2386	MAPT	0	intronic	0.288	7	5	14
rs55947022	20	17	44293205	rs2696609	44147574	0.958962	rs2696609	44147574	A	G	0.0113148	DBP	17:44147574:A:G	0.2406	KANSL1	0	intronic	2.096	5	4	5
rs55947210	20	17	44293205	rs2696609	43808763	0.953951	rs2696609	43808763	G	A	0.0118262	DBP	17:43808763:A:G	0.2396	CRHR1:RP11-105N13.4	00:00:00	ncRNA_intronic	11.04	5	9	9
rs55960528	20	17	44293205	rs2696609	43968994	0.953951	rs2696609	43968994	C	T	0.0127231	DBP	17:43968994:C:T	0.2396	MAPT-AS1	0	ncRNA_intronic	4.601	7	5	14
rs55962674	20	17	44293205	rs2696609	43799033	0.953951	rs2696609	43799033	T	C	0.0121876	DBP	17:43799033:C:T	0.2396	CRHR1:RP11-105N13.4	00:00:00	ncRNA_intronic	0.412	5	5	14
rs55972157	20	17	44293205	rs2696609	43768703	0.953951	rs2696609	43768703	T	C	0.0138045	DBP	17:43768703:C:T	0.2396	CRHR1:RP11-105N13.4	00:00:00	ncRNA_intronic	4.715	5	7	13
rs55972730	20	17	44293205	rs2696609	44155707	0.958962	rs2696609	44155707	T	C	0.0127501	DBP	17:44155707:C:T	0.2406	KANSL1	0	intronic	0.81	7	2	5
rs55973918	20	17	44293205	rs2696609	43792252	0.953951	rs2696609	43792252	A	C	0.0121195	DBP	17:43792252:A:C	0.2396	CRHR1:RP11-105N13.4	00:00:00	ncRNA_intronic	0.145	6	5	14
rs55974014	20	17	44293205	rs2696609	43757450	0.89372	rs2696609	43757450	A	C	0.0254588	DBP	17:43757450:A:C	0.2316	CRHR1:RP11-105N13.4	00:00:00	ncRNA_intronic	0.613	5	5	14
rs55975673	20	17	44293205	rs2696609	43959113	0.953951	rs2696609	43959113	G	A	0.0122689	DBP	17:43959113:A:G	0.2396	MAPT-AS1	0	ncRNA_intronic	5.104	5	9	14
rs55978005	20	17	44293205	rs2696609	44031540	0.953951	rs2696609	44031540	T	G	0.0119923	DBP	17:44031540:G:T	0.2396	MAPT	0	intronic	3.192	3a	5	14
rs55980621	20	17	44293205	rs2696609	43768496	0.953951	rs2696609	43768496	T	C	0.01304	DBP	17:43768496:C:T	0.2396	CRHR1:RP11-105N13.4	00:00:00	ncRNA_intronic	1.761	5	7	13
rs55989971	20	17	44293205	rs2696609	43798160	0.953951	rs2696609	43798160	A	G	0.0121876	DBP	17:43798160:A:G	0.2396	CRHR1:RP11-105N13.4	00:00:00	ncRNA_intronic	0.213	5	5	14
rs55991914	20	17	44293205	rs2696609	43854267	0.953951	rs2696609	43854267	T	C	0.0129781	DBP	17:43854267:C:T	0.2396	CRHR1:RP11-105N13.4	00:00:00	ncRNA_intronic	1.119	5	5	14
rs55996632	20	17	44293205	rs2696609	43935888	0.953951	rs2696609	43935888	T	C	0.0113956	DBP	17:43935888:C:T	0.2396	MAPT-AS1	0	ncRNA_intronic	4.091	5	5	14
rs56002706	20	17	44293205	rs2696609	44000505	0.953951	rs2696609	44000505	T	C	0.0112132	DBP	17:44000505:C:T	0.2396	MAPT	0	intronic	0.351	5	2	14
rs56006248	20	17	44293205	rs2696609	43815141	0.953951	rs2696609	43815141	G	A	0.0118262	DBP	17:43815141:A:G	0.2396	CRHR1:RP11-105N13.4	00:00:00	ncRNA_intronic	0.59	7	5	14
rs56013908	20	17	44293205	rs2696609	43836920	0.953951	rs2696609	43836920	C	T	0.0128914	DBP	17:43836920:C:T	0.2396	CRHR1:RP11-105N13.4	00:00:00	ncRNA_intronic	3.339	5	5	14
rs56023973	20	17	44293205	rs2696609	43917776	0.953951	rs2696609	43917776	T	G	0.0109668	DBP	17:43917776:G:T	0.2396	MAPT-AS1	3240	intergenic	1.06	5	5	15
rs56036719	20	17	44293205	rs2696609	43943974	0.953951	rs2696609	43943974	T	C	0.0117842	DBP	17:43943974:C:T	0.2396	MAPT-AS1	0	ncRNA_intronic	0.275	7	5	14
rs56040418	20	17	44293205	rs2696609	43958079	0.948737	rs2696609	43958079	T	C	0.015171	DBP	17:43958079:C:T	0.2406	MAPT-AS1	0	ncRNA_intronic	4.194	7	9	14
rs56042957	20	17	44293205	rs2696609	43992244	0.953951	rs2696609	43992244	A	G	0.0120765	DBP	17:43992244:A:G	0.2396	MAPT	0	intronic	1.306	7	4	14
rs56043078	20	17	44293205	rs2696609	43853235	0.953951	rs2696609	43853235	G	T	0.0129739	DBP	17:43853235:G:T	0.2396	CRHR1:RP11-105N13.4	00:00:00	ncRNA_intronic	0.872	4	5	14
rs56046792	20	17	44293205	rs2696609	43797246	0.953951	rs2696609	43797246	T	C	0.011653	DBP	17:43797246:C:T	0.2396	CRHR1:RP11-105N13.4	00:00:00	ncRNA_intronic	2.179	4	5	14
rs56062621	20	17	44293205	rs2696609	43798903	0.953951	rs2696609	43798903	G	A	0.0121968	DBP	17:43798903:A:G	0.2396	CRHR1:RP11-105N13.4	00:00:00	ncRNA_intronic	4.67	5	5	14
rs56070245	20	17	44293205	rs2696609	43847868	0.953951	rs2696609	43847868	C	T	0.0131789	DBP	17:43847868:C:T	0.2396	CRHR1:RP11-105N13.4	00:00:00	ncRNA_intronic	4.711	6	5	14
rs56080482	20	17	44293205	rs2696609	44032597	0.953951	rs2696609	44032597	A	G	0.0119923	DBP	17:44032597:A:G	0.2396	MAPT	0	intronic	1.175	3a	5	14
rs56082319	20	17	44293205	rs2696609	43844798	0.948737	rs2696609	43844798	A	G	0.00905494	DBP	17:43844798:A:G	0.2406	CRHR1:RP11-105N13.4	00:00:00	ncRNA_intronic	6.145	6	5	14
rs56099546	20	17	44293205	rs2696609	43894609	0.953951	rs2696609	43894609	G	A	0.00989992	DBP	17:43894609:A:G	0.2396	CRHR1	0	intronic	14.12	5	5	15
rs56100013	20	17	44293205	rs2696609	43768467	0.953951	rs2696609	43768467	T	C	0.0138045	DBP	17:43768467:C:T	0.2396	CRHR1:RP11-105N13.4	00:00:00	ncRNA_intronic	0.268	5	7	13
rs56100031	20	17	44293205	rs2696609	44155157	0.958962	rs2696609	44155157	T	C	0.0127501	DBP	17:44155157:C:T	0.2406	KANSL1	0	intronic	2.491	6	4	5
rs56101773	20	17	44293205	rs2696609	43957269	0.953951	rs2696609	43957269	C	T	0.0121956	DBP	17:43957269:C:T	0.2396	MAPT-AS1	0	ncRNA_intronic	0.401	7	14	14
rs56109643	20	17	44293205	rs2696609	43844859	0.953951	rs2696609	43844859	G	A	0.0129739	DBP	17:43844859:A:G	0.2396	CRHR1:RP11-105N13.4	00:00:00	ncRNA_intronic	8.963	5	5	14
rs56110538	20	17	44293205	rs2696609	43768727	0.953951	rs2696609	43768727	A	G	0.0138045	DBP	17:43768727:A:G	0.2396	CRHR1:RP11-105N13.4	00:00:00	ncRNA_intronic	2.455	5	7	13
rs56113217	20	17	44293205	rs2696609	43926948	0.948737	rs2696609	43926948	G	A	0.0114108	DBP	17:43926948:A:G	0.2406	MAPT-AS1	0	ncRNA_intronic	0.033	4	5	14
rs56119705	20	17	44293205	rs2696609	44209985	0.953951	rs2696609	44209985	C	T	0.0122289	DBP	17:44209985:C:T	0.2396	KANSL1	0	intronic	2.824	7	4	5
rs56127111	20	17	44293205	rs2696609	43913315	0.953951	rs2696609	43913315	T	C	0.010872	DBP	17:43913315:C:T	0.2396	CRHR1	120	downstream	0.51	5	5	15
rs56127309	20	17	44293205	rs2696609	43960341	0.948737	rs2696609	43960341	A	G	0.0119829	DBP	17:43960341:A:G	0.2406	MAPT-AS1	0	ncRNA_intronic	7.6	5	7	14
rs56136075	20	17	44293205	rs2696609	43936298	0.953951	rs2696609	43936298	A	C	0.0113956	DBP	17:43936298:A:C	0.2396	MAPT-AS1	0	ncRNA_intronic	12.13	5	5	14
rs56146262	20	17	44293205	rs2696609	43931907	0.953951	rs2696609	43931907	A	C	0.0116372	DBP	17:43931907:A:C	0.2396	MAPT-AS1	0	ncRNA_intronic	0.044	2b	5	14
rs56150806	20	17	44293205	rs2696609	43919301	0.953951	rs2696609	43919301	C	T	0.010953	DBP	17:43919301:C:T	0.2396	MAPT-AS1	1715	intergenic	3.157	3a	5	15
rs56160448	20	17	44293205	rs2696609	43792358	0.953951	rs2696609	43792358	G	A	0.0121299	DBP	17:43792358:A:G	0.2396	CRHR1:RP11-105N13.4	00:00:00	ncRNA_intronic	1.055	7	5	14
rs56166491	20	17	44293205	rs2696609	44042221	0.958962	rs2696609	44042221	G	A	0.0131943	DBP	17:44042221:A:G	0.2406	MAPT	0	intronic	0.606	5	4	14
rs56167560	20	17	44293205	rs2696609	43792411	0.953951	rs2696609	43792411	G	A	0.0116603	DBP	17:43792411:A:G	0.2396	CRHR1:RP11-105N13.4	00:00:00	ncRNA_intronic	9.427	5	5	14
rs56168907	20	17	44293205	rs2696609	43837091	0.953951	rs2696609	43837091	C	T	0.0129581	DBP	17:43837091:C:T	0.2396	CRHR1:RP11-105N13.4	00:00:00	ncRNA_intronic	3.592	2b	5	14
rs56178230	20	17	44293205	rs2696609	43817832	0.953951	rs2696609	43817832	A	G	0.0116911	DBP	17:43817832:A:G	0.2396	CRHR1:RP11-105N13.4	00:00:00	ncRNA_intronic	2.377	4	5	14
rs56180212	20	17	44293205	rs2696609	43960911	0.948737	rs2696609	43960911	G	A	0.0147125	DBP	17:43960911:A:G	0.2406	MAPT-AS1	0	ncRNA_intronic	4.09	5	7	14
rs56189701	20	17	44293205	rs2696609	43987801	0.948973	rs2696609	43987801	C	T	0.0114756	DBP	17:43987801:C:T	0.2386	MAPT:RP11-669E14.4	00:00:00	ncRNA_intronic	1.194	6	5	14
rs56194412	20	17	44293205	rs2696609	43960600	0.953951	rs2696609	43960600	C	T	0.0123358	DBP	17:43960600:C:T	0.2396	MAPT-AS1	0	ncRNA_intronic	15.7	5	7	14
rs56194509	20	17	44293205	rs2696609	43844559	0.953951	rs2696609	43844559	G	T	0.0129739	DBP	17:43844559:G:T	0.2396	CRHR1:RP11-105N13.4	00:00:00	ncRNA_intronic	12.2	5	5	14
rs56197117	20	17	44293205	rs2696609	44003446	0.953951	rs2696609	44003446	G	A	0.0111484	DBP	17:44003446:A:G	0.2396	MAPT	0	intronic	0.143	6	5	15
rs56200760	20	17	44293205	rs2696609	43772018	0.953951	rs2696609	43772018	T	G	0.0137371	DBP	17:43772018:G:T	0.2396	CRHR1:RP11-105N13.4	00:00:00	ncRNA_intronic	1.462	7	9	14
rs56220242	20	17	44293205	rs2696609	43792326	0.953951	rs2696609	43792326	T	C	0.0114766	DBP	17:43792326:C:T	0.2396	CRHR1:RP11-105N13.4	00:00:00	ncRNA_intronic	3.21	6	5	14
rs56226437	20	17	44293205	rs2696609	44042361	0.958962	rs2696609	44042361	C	T	0.0129402	DBP	17:44042361:C:T	0.2406	MAPT	0	intronic	4.613	5	4	14
rs56233672	20	17	44293205	rs2696609	43920300	0.953951	rs2696609	43920300	C	T	0.0107489	DBP	17:43920300:C:T	0.2396	MAPT-AS1	716	downstream	0.736	7	5	15
rs56234850	20	17	44293205	rs2696609	44060248	0.958962	rs2696609	44060248	A	G	0.0133299	DBP	17:44060248:A:G	0.2406	MAPT	0	intronic	2.423	5	4	15
rs56249080	20	17	44293205	rs2696609	43939432	0.953951	rs2696609	43939432	T	G	0.0116834	DBP	17:43939432:G:T	0.2396	MAPT-AS1	0	ncRNA_intronic	0.657	5	5	14
rs56249311	20	17	44293205	rs2696609	44003599	0.953951	rs2696609	44003599	T	C	0.011154	DBP	17:44003599:C:T	0.2396	MAPT	0	intronic	1.941	6	5	15
rs56249780	20	17	44293205	rs2696609	43957328	0.953951	rs2696609	43957328	T	C	0.0122048	DBP	17:43957328:C:T	0.2396	MAPT-AS1	0	ncRNA_intronic	1.519	7	14	14
rs56254732	20	17	44293205	rs2696609	43932049	0.953951	rs2696609	43932049	T	C	0.0119688	DBP	17:43932049:C:T	0.2396	MAPT-AS1	0	ncRNA_intronic	1.543	6	5	14
rs56257094	20	17	44293205	rs2696609	44201667	0.958962	rs2696609	44201667	A	G	0.0116056	DBP	17:44201667:A:G	0.2406	KANSL1	0	intronic	10.11	5	4	5
rs56268325	20	17	44293205	rs2696609	43847741	0.953951	rs2696609	43847741	C	T	0.0131128	DBP	17:43847741:C:T	0.2396	CRHR1:RP11-105N13.4	00:00:00	ncRNA_intronic	3.648	7	5	14
rs56269136	20	17	44293205	rs2696609	43926992	0.948737	rs2696609	43926992	T	C	0.0114151	DBP	17:43926992:C:T	0.2406	MAPT-AS1	0	ncRNA_intronic	7.713	4	5	14
rs56280222	20	17	44293205	rs2696609	43803788	0.953951	rs2696609	43803788	C	T	0.011997	DBP	17:43803788:C:T	0.2396	CRHR1:RP11-105N13.4	00:00:00	ncRNA_intronic	10.23	5	9	14
rs56280951	20	17	44293205	rs2696609	44041107	0.958962	rs2696609	44041107	A	G	0.0129539	DBP	17:44041107:A:G	0.2406	MAPT	0	intronic	8.904	5	4	14
rs56283089	20	17	44293205	rs2696609	43769321	0.953951	rs2696609	43769321	C	A	0.0138026	DBP	17:43769321:A:C	0.2396	CRHR1:RP11-105N13.4	00:00:00	ncRNA_intronic	0.916	5	13	14
rs56288604	20	17	44293205	rs2696609	43931380	0.953951	rs2696609	43931380	G	A	0.011328	DBP	17:43931380:A:G	0.2396	MAPT-AS1	0	ncRNA_intronic	0.499	5	5	14
rs56289364	20	17	44293205	rs2696609	43947928	0.953951	rs2696609	43947928	G	A	0.0117227	DBP	17:43947928:A:G	0.2396	MAPT-AS1	0	ncRNA_intronic	5.097	5	5	14
rs56290582	20	17	44293205	rs2696609	43788371	0.953951	rs2696609	43788371	T	C	0.0103983	DBP	17:43788371:C:T	0.2396	CRHR1:RP11-105N13.4	00:00:00	ncRNA_intronic	5.256	5	5	14
rs56294117	20	17	44293205	rs2696609	44042783	0.958962	rs2696609	44042783	A	G	0.0129539	DBP	17:44042783:A:G	0.2406	MAPT	0	intronic	3.419	7	4	14
rs56295996	20	17	44293205	rs2696609	43817557	0.953951	rs2696609	43817557	T	C	0.0117589	DBP	17:43817557:C:T	0.2396	CRHR1:RP11-105N13.4	00:00:00	ncRNA_intronic	0.384	3a	5	14
rs56298110	20	17	44293205	rs2696609	43815336	0.953951	rs2696609	43815336	G	A	0.0118262	DBP	17:43815336:A:G	0.2396	CRHR1:RP11-105N13.4	00:00:00	ncRNA_intronic	4.042	6	5	14
rs56299858	20	17	44293205	rs2696609	43939659	0.953951	rs2696609	43939659	A	G	0.0116299	DBP	17:43939659:A:G	0.2396	MAPT-AS1	0	ncRNA_intronic	2.435	4	5	14
rs56301449	20	17	44293205	rs2696609	43960918	0.953951	rs2696609	43960918	C	T	0.0123358	DBP	17:43960918:C:T	0.2396	MAPT-AS1	0	ncRNA_intronic	3.772	5	7	14
rs56301633	20	17	44293205	rs2696609	44077850	0.958962	rs2696609	44077850	A	G	0.0127241	DBP	17:44077850:A:G	0.2406	MAPT	0	intronic	1.269	5	4	15
rs56303031	20	17	44293205	rs2696609	43853922	0.953951	rs2696609	43853922	A	G	0.0130212	DBP	17:43853922:A:G	0.2396	CRHR1:RP11-105N13.4	00:00:00	ncRNA_intronic	0.357	7	5	14
rs56303672	20	17	44293205	rs2696609	43996960	0.953951	rs2696609	43996960	G	A	0.011482	DBP	17:43996960:A:G	0.2396	MAPT	0	intronic	5.342	5	4	14
rs56312737	20	17	44293205	rs2696609	43769516	0.953951	rs2696609	43769516	A	C	0.0138045	DBP	17:43769516:A:C	0.2396	CRHR1:RP11-105N13.4	00:00:00	ncRNA_intronic	0.551	6	13	14
rs56317731	20	17	44293205	rs2696609	44032073	0.953951	rs2696609	44032073	G	A	0.0117987	DBP	17:44032073:A:G	0.2396	MAPT	0	intronic	0.193	7	5	14
rs56318865	20	17	44293205	rs2696609	44147411	0.958962	rs2696609	44147411	A	G	0.0127501	DBP	17:44147411:A:G	0.2406	KANSL1	0	intronic	3.852	7	4	5
rs56319902	20	17	44293205	rs2696609	43871982	0.953951	rs2696609	43871982	T	C	0.0118322	DBP	17:43871982:C:T	0.2396	CRHR1:RP11-105N13.4	00:00:00	ncRNA_intronic	2.15	5	5	14
rs56323304	20	17	44293205	rs2696609	43932129	0.948737	rs2696609	43932129	T	C	0.0123437	DBP	17:43932129:C:T	0.2406	MAPT-AS1	0	ncRNA_intronic	0.271	7	5	14
rs56323408	20	17	44293205	rs2696609	44147721	0.958962	rs2696609	44147721	T	C	0.0167746	DBP	17:44147721:C:T	0.2406	KANSL1	0	intronic	0.502	6	4	5
rs56323722	20	17	44293205	rs2696609	43798015	0.953951	rs2696609	43798015	C	A	0.0121968	DBP	17:43798015:A:C	0.2396	CRHR1:RP11-105N13.4	00:00:00	ncRNA_intronic	4.932	5	5	14
rs56323832	20	17	44293205	rs2696609	43768633	0.953951	rs2696609	43768633	A	G	0.0138045	DBP	17:43768633:A:G	0.2396	CRHR1:RP11-105N13.4	00:00:00	ncRNA_intronic	2.54	5	7	13
rs56328224	20	17	44293205	rs2696609	43572419	0.933194	rs2696609	43572419	T	C	0.0125768	DBP	17:43572419:C:T	0.2396	PLEKHM1	4303	intergenic	4.081	7	5	15
rs56329743	20	17	44293205	rs2696609	43931245	0.953951	rs2696609	43931245	A	G	0.0112453	DBP	17:43931245:A:G	0.2396	MAPT-AS1	0	ncRNA_intronic	9.537	5	5	14
rs56343551	20	17	44293205	rs2696609	43959092	0.953951	rs2696609	43959092	T	G	0.0122734	DBP	17:43959092:G:T	0.2396	MAPT-AS1	0	ncRNA_intronic	8.17	7	9	14
rs56347602	20	17	44293205	rs2696609	43939255	0.953951	rs2696609	43939255	C	T	0.0116288	DBP	17:43939255:C:T	0.2396	MAPT-AS1	0	ncRNA_intronic	3.346	6	5	14
rs56354807	20	17	44293205	rs2696609	43920378	0.953951	rs2696609	43920378	T	C	0.0107524	DBP	17:43920378:C:T	0.2396	MAPT-AS1	638	downstream	2.043	7	5	15
rs56357543	20	17	44293205	rs2696609	43894547	0.953951	rs2696609	43894547	T	C	0.0100503	DBP	17:43894547:C:T	0.2396	CRHR1	0	intronic	0.722	5	5	15
rs56364632	20	17	44293205	rs2696609	43956642	0.953951	rs2696609	43956642	C	T	0.0121956	DBP	17:43956642:C:T	0.2396	MAPT-AS1	0	ncRNA_intronic	2.671	7	14	14
rs56365901	20	17	44293205	rs2696609	43960323	0.953951	rs2696609	43960323	G	A	0.0123358	DBP	17:43960323:A:G	0.2396	MAPT-AS1	0	ncRNA_intronic	5.8	5	7	14
rs56380663	20	17	44293205	rs2696609	43804619	0.953951	rs2696609	43804619	T	C	0.0119144	DBP	17:43804619:C:T	0.2396	CRHR1:RP11-105N13.4	00:00:00	ncRNA_intronic	0.169	5	9	14
rs56384960	20	17	44293205	rs2696609	43817608	0.953951	rs2696609	43817608	A	G	0.0117589	DBP	17:43817608:A:G	0.2396	CRHR1:RP11-105N13.4	00:00:00	ncRNA_intronic	4.422	4	2	14
rs56385754	20	17	44293205	rs2696609	43927255	0.948737	rs2696609	43927255	T	G	0.0114151	DBP	17:43927255:G:T	0.2406	MAPT-AS1	0	ncRNA_intronic	0.958	5	5	14
rs56387266	20	17	44293205	rs2696609	43847912	0.953951	rs2696609	43847912	C	T	0.0131789	DBP	17:43847912:C:T	0.2396	CRHR1:RP11-105N13.4	00:00:00	ncRNA_intronic	4.389	6	5	14
rs56387391	20	17	44293205	rs2696609	43959261	0.953951	rs2696609	43959261	A	G	0.0122734	DBP	17:43959261:A:G	0.2396	MAPT-AS1	0	ncRNA_intronic	5.484	7	9	14
rs56391096	20	17	44293205	rs2696609	43774845	0.953951	rs2696609	43774845	T	C	0.0137371	DBP	17:43774845:C:T	0.2396	CRHR1:RP11-105N13.4	00:00:00	ncRNA_intronic	6.002	7	9	14
rs56397077	20	17	44293205	rs2696609	43788419	0.953951	rs2696609	43788419	A	C	0.0121195	DBP	17:43788419:A:C	0.2396	CRHR1:RP11-105N13.4	00:00:00	ncRNA_intronic	4.643	5	5	14
rs56398500	20	17	44293205	rs2696609	43947488	0.953951	rs2696609	43947488	G	A	0.0117227	DBP	17:43947488:A:G	0.2396	MAPT-AS1	0	ncRNA_intronic	2.817	4	5	14
rs56400821	20	17	44293205	rs2696609	43760080	0.93867	rs2696609	43760080	A	C	0.0167064	DBP	17:43760080:A:C	0.2386	CRHR1:RP11-105N13.4	00:00:00	ncRNA_intronic	0.431	6	5	14
rs56971664	20	17	44293205	rs2696609	43918613	0.953951	rs2696609	43918613	C	T	0.00811989	DBP	17:43918613:C:T	0.2396	MAPT-AS1	2403	intergenic	2.24	5	5	15
rs57222984	20	17	44293205	rs2696609	43758898	0.841337	rs2696609	43758898	G	A	0.0193984	DBP	17:43758898:A:G	0.2654	CRHR1:RP11-105N13.4	00:00:00	ncRNA_intronic	0.076	5	5	14
rs58879558	20	17	44293205	rs2696609	44095467	0.907925	rs2696609	44095467	C	T	0.00937239	DBP	17:44095467:C:T	0.2505	MAPT	0	intronic	0.422	3a	5	5
rs60814418	20	17	44293205	rs2696609	43850645	0.943219	rs2696609	43850645	T	C	0.0156752	DBP	17:43850645:C:T	0.2435	CRHR1:RP11-105N13.4	00:00:00	ncRNA_intronic	0.32	5	5	14
rs611351	20	17	44293205	rs2696609	43692935	0.958962	rs2696609	43692935	G	A	0.0140714	DBP	17:43692935:A:G	0.2406	CRHR1-IT1	4758	intergenic	7.14	NA	14	15
rs61667602	20	17	44293205	rs2696609	43785349	0.948607	rs2696609	43785349	C	T	0.0128563	DBP	17:43785349:C:T	0.2406	CRHR1:RP11-105N13.4	00:00:00	ncRNA_intronic	3.614	6	5	14
rs62053939	20	17	44293205	rs2696609	43740856	0.953951	rs2696609	43740856	T	C	0.0137805	DBP	17:43740856:C:T	0.2396	CRHR1:RP11-105N13.4	00:00:00	ncRNA_intronic	0.044	7	5	14
rs62053940	20	17	44293205	rs2696609	43741028	0.953951	rs2696609	43741028	G	A	0.014054	DBP	17:43741028:A:G	0.2396	CRHR1:RP11-105N13.4	00:00:00	ncRNA_intronic	6.486	6	5	14
rs62053945	20	17	44293205	rs2696609	43746839	0.953951	rs2696609	43746839	C	T	0.0140887	DBP	17:43746839:C:T	0.2396	CRHR1:RP11-105N13.4	00:00:00	ncRNA_intronic	3.007	6	5	14
rs62053946	20	17	44293205	rs2696609	43747677	0.953951	rs2696609	43747677	T	C	0.0141631	DBP	17:43747677:C:T	0.2396	CRHR1:RP11-105N13.4	00:00:00	ncRNA_intronic	6.772	7	5	14
rs62053947	20	17	44293205	rs2696609	43747683	0.953951	rs2696609	43747683	A	G	0.0141631	DBP	17:43747683:A:G	0.2396	CRHR1:RP11-105N13.4	00:00:00	ncRNA_intronic	8.238	7	5	14
rs62053948	20	17	44293205	rs2696609	43748046	0.953951	rs2696609	43748046	T	C	0.0141631	DBP	17:43748046:C:T	0.2396	CRHR1:RP11-105N13.4	00:00:00	ncRNA_intronic	4.733	7	5	14
rs62053949	20	17	44293205	rs2696609	43748101	0.953951	rs2696609	43748101	G	A	0.0141642	DBP	17:43748101:A:G	0.2396	CRHR1:RP11-105N13.4	00:00:00	ncRNA_intronic	2.916	7	5	14
rs62053950	20	17	44293205	rs2696609	43748412	0.953951	rs2696609	43748412	G	A	0.0141642	DBP	17:43748412:A:G	0.2396	CRHR1:RP11-105N13.4	00:00:00	ncRNA_intronic	2.616	5	5	14
rs62053952	20	17	44293205	rs2696609	43749261	0.953951	rs2696609	43749261	C	T	0.0139349	DBP	17:43749261:C:T	0.2396	CRHR1:RP11-105N13.4	00:00:00	ncRNA_intronic	2.212	5	5	14
rs62053953	20	17	44293205	rs2696609	43749454	0.953951	rs2696609	43749454	A	G	0.0142413	DBP	17:43749454:A:G	0.2396	CRHR1:RP11-105N13.4	00:00:00	ncRNA_intronic	8.663	5	6	14
rs62053954	20	17	44293205	rs2696609	43749949	0.953951	rs2696609	43749949	A	G	0.0142413	DBP	17:43749949:A:G	0.2396	CRHR1:RP11-105N13.4	00:00:00	ncRNA_intronic	4.777	3a	5	14
rs62053955	20	17	44293205	rs2696609	43749980	0.953951	rs2696609	43749980	C	T	0.0142498	DBP	17:43749980:C:T	0.2396	CRHR1:RP11-105N13.4	00:00:00	ncRNA_intronic	1.758	4	5	14
rs62053956	20	17	44293205	rs2696609	43750315	0.953951	rs2696609	43750315	G	A	0.0142498	DBP	17:43750315:A:G	0.2396	CRHR1:RP11-105N13.4	00:00:00	ncRNA_intronic	1.341	5	5	14
rs62053957	20	17	44293205	rs2696609	43750939	0.953951	rs2696609	43750939	C	T	0.0142498	DBP	17:43750939:C:T	0.2396	CRHR1:RP11-105N13.4	00:00:00	ncRNA_intronic	5.452	7	5	14
rs62054378	20	17	44293205	rs2696609	43799667	0.953951	rs2696609	43799667	A	C	0.0122552	DBP	17:43799667:A:C	0.2396	CRHR1:RP11-105N13.4	00:00:00	ncRNA_intronic	4.825	2b	9	14
rs62054380	20	17	44293205	rs2696609	43800987	0.953951	rs2696609	43800987	A	C	0.0122552	DBP	17:43800987:A:C	0.2396	CRHR1:RP11-105N13.4	00:00:00	ncRNA_intronic	1.539	7	9	14
rs62054381	20	17	44293205	rs2696609	43801185	0.948607	rs2696609	43801185	G	A	0.0124994	DBP	17:43801185:A:G	0.2406	CRHR1:RP11-105N13.4	00:00:00	ncRNA_intronic	0.362	5	9	14
rs62054382	20	17	44293205	rs2696609	43802525	0.953951	rs2696609	43802525	T	C	0.0122552	DBP	17:43802525:C:T	0.2396	CRHR1:RP11-105N13.4	00:00:00	ncRNA_intronic	1.37	5	9	14
rs62054383	20	17	44293205	rs2696609	43802907	0.953951	rs2696609	43802907	C	T	0.01304	DBP	17:43802907:C:T	0.2396	CRHR1:RP11-105N13.4	00:00:00	ncRNA_intronic	2.444	5	9	14
rs62054384	20	17	44293205	rs2696609	43804306	0.953951	rs2696609	43804306	C	T	0.0118561	DBP	17:43804306:C:T	0.2396	CRHR1:RP11-105N13.4	00:00:00	ncRNA_intronic	3.578	7	9	14
rs62054387	20	17	44293205	rs2696609	43805525	0.953951	rs2696609	43805525	C	A	0.0119688	DBP	17:43805525:A:C	0.2396	CRHR1:RP11-105N13.4	00:00:00	ncRNA_intronic	2.839	5	9	14
rs62054388	20	17	44293205	rs2696609	43805590	0.953951	rs2696609	43805590	T	C	0.0118954	DBP	17:43805590:C:T	0.2396	CRHR1:RP11-105N13.4	00:00:00	ncRNA_intronic	6.668	7	9	14
rs62054389	20	17	44293205	rs2696609	43808321	0.953951	rs2696609	43808321	A	G	0.0118274	DBP	17:43808321:A:G	0.2396	CRHR1:RP11-105N13.4	00:00:00	ncRNA_intronic	2.108	7	9	9
rs62054390	20	17	44293205	rs2696609	43808443	0.943622	rs2696609	43808443	C	A	0.0115547	DBP	17:43808443:A:C	0.2396	CRHR1:RP11-105N13.4	00:00:00	ncRNA_intronic	1.373	7	9	9
rs62054392	20	17	44293205	rs2696609	43808945	0.953951	rs2696609	43808945	T	C	0.0118274	DBP	17:43808945:C:T	0.2396	CRHR1:RP11-105N13.4	00:00:00	ncRNA_intronic	3.069	5	8	9
rs62054393	20	17	44293205	rs2696609	43809264	0.953951	rs2696609	43809264	G	T	0.0118262	DBP	17:43809264:G:T	0.2396	CRHR1:RP11-105N13.4:RP11-293E1.2	00:00:00	ncRNA_exonic	4.751	5	8	9
rs62054395	20	17	44293205	rs2696609	43811060	0.953951	rs2696609	43811060	G	T	0.0118262	DBP	17:43811060:G:T	0.2396	CRHR1:RP11-105N13.4:RP11-293E1.1	00:00:00	ncRNA_intronic	1.937	6	5	14
rs62054396	20	17	44293205	rs2696609	43811510	0.953951	rs2696609	43811510	C	T	0.0118262	DBP	17:43811510:C:T	0.2396	CRHR1:RP11-105N13.4:RP11-293E1.1	00:00:00	ncRNA_intronic	7.054	7	5	14
rs62054397	20	17	44293205	rs2696609	43811792	0.953951	rs2696609	43811792	T	C	0.0118274	DBP	17:43811792:C:T	0.2396	CRHR1:RP11-105N13.4:RP11-293E1.1	00:00:00	ncRNA_exonic	10.38	5	5	14
rs62054398	20	17	44293205	rs2696609	43812599	0.953951	rs2696609	43812599	G	A	0.0118262	DBP	17:43812599:A:G	0.2396	CRHR1:RP11-105N13.4	00:00:00	ncRNA_intronic	3.759	7	5	14
rs62054399	20	17	44293205	rs2696609	43812624	0.953951	rs2696609	43812624	A	G	0.0118274	DBP	17:43812624:A:G	0.2396	CRHR1:RP11-105N13.4	00:00:00	ncRNA_intronic	3.445	6	5	14
rs62054400	20	17	44293205	rs2696609	43812649	0.953951	rs2696609	43812649	C	T	0.0118262	DBP	17:43812649:C:T	0.2396	CRHR1:RP11-105N13.4	00:00:00	ncRNA_intronic	6.037	6	5	14
rs62054411	20	17	44293205	rs2696609	43812684	0.953951	rs2696609	43812684	G	A	0.0118262	DBP	17:43812684:A:G	0.2396	CRHR1:RP11-105N13.4	00:00:00	ncRNA_intronic	5.854	7	5	14
rs62054412	20	17	44293205	rs2696609	43813002	0.953951	rs2696609	43813002	A	G	0.0118274	DBP	17:43813002:A:G	0.2396	CRHR1:RP11-105N13.4	00:00:00	ncRNA_intronic	1.747	5	5	14
rs62054414	20	17	44293205	rs2696609	43813415	0.953951	rs2696609	43813415	A	G	0.0118274	DBP	17:43813415:A:G	0.2396	CRHR1:RP11-105N13.4	00:00:00	ncRNA_intronic	6.73	5	5	14
rs62054417	20	17	44293205	rs2696609	43815859	0.953951	rs2696609	43815859	C	A	0.0118262	DBP	17:43815859:A:C	0.2396	CRHR1:RP11-105N13.4	00:00:00	ncRNA_intronic	2.558	6	5	14
rs62054418	20	17	44293205	rs2696609	43816306	0.953951	rs2696609	43816306	A	G	0.0118274	DBP	17:43816306:A:G	0.2396	CRHR1:RP11-105N13.4	00:00:00	ncRNA_intronic	2.506	7	5	14
rs62054419	20	17	44293205	rs2696609	43816605	0.953951	rs2696609	43816605	C	A	0.0118262	DBP	17:43816605:A:C	0.2396	CRHR1:RP11-105N13.4	00:00:00	ncRNA_intronic	2.655	6	5	14
rs62054421	20	17	44293205	rs2696609	43816657	0.948607	rs2696609	43816657	A	G	0.0109897	DBP	17:43816657:A:G	0.2406	CRHR1:RP11-105N13.4	00:00:00	ncRNA_intronic	1.15	7	5	14
rs62054424	20	17	44293205	rs2696609	43819384	0.953951	rs2696609	43819384	A	G	0.0115142	DBP	17:43819384:A:G	0.2396	CRHR1:RP11-105N13.4	00:00:00	ncRNA_intronic	2.333	5	5	14
rs62054425	20	17	44293205	rs2696609	43819480	0.953951	rs2696609	43819480	T	C	0.0115142	DBP	17:43819480:C:T	0.2396	CRHR1:RP11-105N13.4	00:00:00	ncRNA_intronic	7.48	5	5	14
rs62054427	20	17	44293205	rs2696609	43821062	0.953951	rs2696609	43821062	G	A	0.0114874	DBP	17:43821062:A:G	0.2396	CRHR1:RP11-105N13.4	00:00:00	ncRNA_intronic	4.874	5	5	14
rs62054428	20	17	44293205	rs2696609	43822511	0.953951	rs2696609	43822511	A	G	0.0114927	DBP	17:43822511:A:G	0.2396	CRHR1:RP11-105N13.4	00:00:00	ncRNA_intronic	6.76	7	5	14
rs62054429	20	17	44293205	rs2696609	43823125	0.953951	rs2696609	43823125	A	G	0.0113378	DBP	17:43823125:A:G	0.2396	CRHR1:RP11-105N13.4	00:00:00	ncRNA_intronic	3.95	5	5	14
rs62054431	20	17	44293205	rs2696609	43823880	0.953951	rs2696609	43823880	T	C	0.0113378	DBP	17:43823880:C:T	0.2396	CRHR1:RP11-105N13.4	00:00:00	ncRNA_intronic	3.521	5	5	14
rs62054432	20	17	44293205	rs2696609	43823889	0.953951	rs2696609	43823889	A	C	0.0113378	DBP	17:43823889:A:C	0.2396	CRHR1:RP11-105N13.4	00:00:00	ncRNA_intronic	0.701	5	5	14
rs62054433	20	17	44293205	rs2696609	43824348	0.953951	rs2696609	43824348	C	T	0.0119829	DBP	17:43824348:C:T	0.2396	CRHR1:RP11-105N13.4	00:00:00	ncRNA_intronic	0.323	7	5	14
rs62054434	20	17	44293205	rs2696609	43824382	0.953951	rs2696609	43824382	G	T	0.0119829	DBP	17:43824382:G:T	0.2396	CRHR1:RP11-105N13.4	00:00:00	ncRNA_intronic	3.385	6	5	14
rs62054436	20	17	44293205	rs2696609	43825568	0.953951	rs2696609	43825568	T	C	0.0113378	DBP	17:43825568:C:T	0.2396	CRHR1:RP11-105N13.4	00:00:00	ncRNA_intronic	0.233	5	5	14
rs62054437	20	17	44293205	rs2696609	43825576	0.948737	rs2696609	43825576	C	T	0.0131045	DBP	17:43825576:C:T	0.2406	CRHR1:RP11-105N13.4	00:00:00	ncRNA_intronic	1.001	5	5	14
rs62054438	20	17	44293205	rs2696609	43825711	0.953951	rs2696609	43825711	C	A	0.0113411	DBP	17:43825711:A:C	0.2396	CRHR1:RP11-105N13.4	00:00:00	ncRNA_intronic	1.229	5	5	14
rs62054439	20	17	44293205	rs2696609	43825725	0.953951	rs2696609	43825725	T	G	0.0113378	DBP	17:43825725:G:T	0.2396	CRHR1:RP11-105N13.4	00:00:00	ncRNA_intronic	3.246	5	5	14
rs62054442	20	17	44293205	rs2696609	43829353	0.948607	rs2696609	43829353	G	A	0.010953	DBP	17:43829353:A:G	0.2406	CRHR1:RP11-105N13.4	00:00:00	ncRNA_intronic	0.072	5	5	14
rs62054760	20	17	44293205	rs2696609	43908989	0.939112	rs2696609	43908989	T	C	0.015932	DBP	17:43908989:C:T	0.2366	CRHR1	0	intronic	2.161	5	5	14
rs62054761	20	17	44293205	rs2696609	43909008	0.939112	rs2696609	43909008	T	C	0.015932	DBP	17:43909008:C:T	0.2366	CRHR1	0	intronic	4.938	5	5	14
rs62054762	20	17	44293205	rs2696609	43909022	0.939112	rs2696609	43909022	T	G	0.015932	DBP	17:43909022:G:T	0.2366	CRHR1	0	intronic	3.556	5	5	14
rs62054803	20	17	44293205	rs2696609	43914728	0.953951	rs2696609	43914728	T	G	0.0109299	DBP	17:43914728:G:T	0.2396	CRHR1	1533	intergenic	1.312	5	5	15
rs62054804	20	17	44293205	rs2696609	43914809	0.953951	rs2696609	43914809	T	C	0.0109299	DBP	17:43914809:C:T	0.2396	CRHR1	1614	intergenic	0.116	5	5	15
rs62054805	20	17	44293205	rs2696609	43915054	0.953951	rs2696609	43915054	G	A	0.0109438	DBP	17:43915054:A:G	0.2396	CRHR1	1859	intergenic	5.144	2b	5	15
rs62054806	20	17	44293205	rs2696609	43915312	0.953951	rs2696609	43915312	T	C	0.0108487	DBP	17:43915312:C:T	0.2396	CRHR1	2117	intergenic	0.468	5	5	15
rs62054807	20	17	44293205	rs2696609	43915497	0.649393	rs2696609	43915497	T	C	0.0452758	DBP	17:43915497:C:T	0.3201	CRHR1	2302	intergenic	5.504	5	5	15
rs62054809	20	17	44293205	rs2696609	43918239	0.953951	rs2696609	43918239	T	C	0.0109668	DBP	17:43918239:C:T	0.2396	MAPT-AS1	2777	intergenic	0.606	7	5	15
rs62054815	20	17	44293205	rs2696609	43923266	0.953951	rs2696609	43923266	A	G	0.0097311	DBP	17:43923266:A:G	0.2396	MAPT-AS1:SPPL2C	00:00:00	exonic	0.018	5	5	15
rs62054817	20	17	44293205	rs2696609	43925966	0.948737	rs2696609	43925966	A	G	0.0123877	DBP	17:43925966:A:G	0.2406	MAPT-AS1	0	ncRNA_intronic	1.563	4	5	14
rs62054818	20	17	44293205	rs2696609	43926056	0.948737	rs2696609	43926056	C	A	0.0115897	DBP	17:43926056:A:C	0.2406	MAPT-AS1	0	ncRNA_intronic	6.949	4	2	14
rs62054819	20	17	44293205	rs2696609	43926149	0.948737	rs2696609	43926149	G	A	0.0115897	DBP	17:43926149:A:G	0.2406	MAPT-AS1	0	ncRNA_intronic	5.198	4	2	14
rs62054820	20	17	44293205	rs2696609	43926755	0.948737	rs2696609	43926755	G	A	0.0114108	DBP	17:43926755:A:G	0.2406	MAPT-AS1	0	ncRNA_intronic	3.67	5	5	14
rs62054822	20	17	44293205	rs2696609	43927708	0.948737	rs2696609	43927708	G	A	0.0102129	DBP	17:43927708:A:G	0.2406	MAPT-AS1	0	ncRNA_intronic	4.196	5	5	14
rs62054823	20	17	44293205	rs2696609	43929029	0.938493	rs2696609	43929029	G	A	0.0110977	DBP	17:43929029:A:G	0.2406	MAPT-AS1	0	ncRNA_intronic	4.545	5	5	14
rs62054824	20	17	44293205	rs2696609	43929992	0.953951	rs2696609	43929992	T	C	0.0111068	DBP	17:43929992:C:T	0.2396	MAPT-AS1	0	ncRNA_intronic	0.169	4	2	14
rs62054825	20	17	44293205	rs2696609	43930033	0.948607	rs2696609	43930033	A	G	0.0115152	DBP	17:43930033:A:G	0.2406	MAPT-AS1	0	ncRNA_intronic	1.442	2b	1	14
rs62054831	20	17	44293205	rs2696609	43932381	0.953951	rs2696609	43932381	T	C	0.0121473	DBP	17:43932381:C:T	0.2396	MAPT-AS1	0	ncRNA_intronic	3.505	6	5	14
rs62054832	20	17	44293205	rs2696609	43933579	0.939112	rs2696609	43933579	A	C	0.0120485	DBP	17:43933579:A:C	0.2366	MAPT-AS1	0	ncRNA_intronic	1.321	4	5	14
rs62054833	20	17	44293205	rs2696609	43933673	0.948607	rs2696609	43933673	C	T	0.0110479	DBP	17:43933673:C:T	0.2406	MAPT-AS1	0	ncRNA_intronic	2.872	6	5	14
rs62054834	20	17	44293205	rs2696609	43934314	0.953951	rs2696609	43934314	C	T	0.0120088	DBP	17:43934314:C:T	0.2396	MAPT-AS1	0	ncRNA_intronic	8.773	7	5	14
rs62054835	20	17	44293205	rs2696609	43934672	0.953951	rs2696609	43934672	C	A	0.0113422	DBP	17:43934672:A:C	0.2396	MAPT-AS1	0	ncRNA_intronic	2.7	7	5	14
rs62054841	20	17	44293205	rs2696609	43937104	0.953951	rs2696609	43937104	A	G	0.0113956	DBP	17:43937104:A:G	0.2396	MAPT-AS1	0	ncRNA_intronic	3.767	7	5	14
rs62054842	20	17	44293205	rs2696609	43937162	0.953951	rs2696609	43937162	T	C	0.0113956	DBP	17:43937162:C:T	0.2396	MAPT-AS1	0	ncRNA_intronic	7.321	7	5	14
rs62054843	20	17	44293205	rs2696609	43937184	0.953951	rs2696609	43937184	C	T	0.0115717	DBP	17:43937184:C:T	0.2396	MAPT-AS1	0	ncRNA_intronic	2.407	6	5	14
rs62054844	20	17	44293205	rs2696609	43937333	0.953951	rs2696609	43937333	G	T	0.0113989	DBP	17:43937333:G:T	0.2396	MAPT-AS1	0	ncRNA_intronic	0.898	6	5	14
rs62054846	20	17	44293205	rs2696609	43938634	0.953951	rs2696609	43938634	G	A	0.0114573	DBP	17:43938634:A:G	0.2396	MAPT-AS1	0	ncRNA_intronic	13.52	5	5	14
rs62054857	20	17	44293205	rs2696609	43939936	0.953951	rs2696609	43939936	A	G	0.0116299	DBP	17:43939936:A:G	0.2396	MAPT-AS1	0	ncRNA_intronic	2.244	7	5	14
rs62054858	20	17	44293205	rs2696609	43940188	0.953951	rs2696609	43940188	C	T	0.0116288	DBP	17:43940188:C:T	0.2396	MAPT-AS1	0	ncRNA_intronic	5.905	6	5	14
rs62054859	20	17	44293205	rs2696609	43940685	0.953951	rs2696609	43940685	A	G	0.0116834	DBP	17:43940685:A:G	0.2396	MAPT-AS1	0	ncRNA_intronic	0.112	7	5	14
rs62055461	20	17	44293205	rs2696609	43941350	0.953951	rs2696609	43941350	T	C	0.0116299	DBP	17:43941350:C:T	0.2396	MAPT-AS1	0	ncRNA_intronic	9.155	5	5	14
rs62055462	20	17	44293205	rs2696609	43941476	0.953951	rs2696609	43941476	C	A	0.0116865	DBP	17:43941476:A:C	0.2396	MAPT-AS1	0	ncRNA_intronic	4.977	7	5	14
rs62055463	20	17	44293205	rs2696609	43941491	0.953951	rs2696609	43941491	G	A	0.0116865	DBP	17:43941491:A:G	0.2396	MAPT-AS1	0	ncRNA_intronic	4.676	5	5	14
rs62055464	20	17	44293205	rs2696609	43941858	0.953951	rs2696609	43941858	G	T	0.0116288	DBP	17:43941858:G:T	0.2396	MAPT-AS1	0	ncRNA_intronic	11.07	5	5	14
rs62055466	20	17	44293205	rs2696609	43942656	0.953951	rs2696609	43942656	A	G	0.0117842	DBP	17:43942656:A:G	0.2396	MAPT-AS1	0	ncRNA_intronic	3.945	6	5	14
rs62055467	20	17	44293205	rs2696609	43942820	0.953951	rs2696609	43942820	C	T	0.0116288	DBP	17:43942820:C:T	0.2396	MAPT-AS1	0	ncRNA_intronic	4.123	6	5	14
rs62055468	20	17	44293205	rs2696609	43943000	0.953951	rs2696609	43943000	C	A	0.0117891	DBP	17:43943000:A:C	0.2396	MAPT-AS1	0	ncRNA_intronic	4.551	5	5	14
rs62055469	20	17	44293205	rs2696609	43943655	0.953951	rs2696609	43943655	C	A	0.0117891	DBP	17:43943655:A:C	0.2396	MAPT-AS1	0	ncRNA_intronic	6.341	5	5	14
rs62055470	20	17	44293205	rs2696609	43943657	0.953951	rs2696609	43943657	G	A	0.0117891	DBP	17:43943657:A:G	0.2396	MAPT-AS1	0	ncRNA_intronic	0.761	5	5	14
rs62055471	20	17	44293205	rs2696609	43943755	0.953951	rs2696609	43943755	C	T	0.0121784	DBP	17:43943755:C:T	0.2396	MAPT-AS1	0	ncRNA_intronic	8.77	7	5	14
rs62055475	20	17	44293205	rs2696609	43945106	0.953951	rs2696609	43945106	C	T	0.0117227	DBP	17:43945106:C:T	0.2396	MAPT-AS1	0	ncRNA_intronic	0.678	4	5	14
rs62055478	20	17	44293205	rs2696609	43945938	0.953951	rs2696609	43945938	T	C	0.0124337	DBP	17:43945938:C:T	0.2396	MAPT-AS1	0	ncRNA_intronic	11.34	5	5	14
rs62055483	20	17	44293205	rs2696609	43948040	0.953951	rs2696609	43948040	T	C	0.0117842	DBP	17:43948040:C:T	0.2396	MAPT-AS1	0	ncRNA_intronic	1.657	5	5	14
rs62055486	20	17	44293205	rs2696609	43949092	0.953951	rs2696609	43949092	G	T	0.0117227	DBP	17:43949092:G:T	0.2396	MAPT-AS1	0	ncRNA_intronic	4.201	7	5	14
rs62055488	20	17	44293205	rs2696609	43950394	0.953951	rs2696609	43950394	T	C	0.0119641	DBP	17:43950394:C:T	0.2396	MAPT-AS1	0	ncRNA_intronic	1.629	7	5	14
rs62055490	20	17	44293205	rs2696609	43950533	0.953951	rs2696609	43950533	G	A	0.0119593	DBP	17:43950533:A:G	0.2396	MAPT-AS1	0	ncRNA_intronic	1.143	7	5	14
rs62055491	20	17	44293205	rs2696609	43951120	0.953951	rs2696609	43951120	C	T	0.0119593	DBP	17:43951120:C:T	0.2396	MAPT-AS1	0	ncRNA_intronic	6.157	4	2	14
rs62055492	20	17	44293205	rs2696609	43951345	0.953951	rs2696609	43951345	A	C	0.0119641	DBP	17:43951345:A:C	0.2396	MAPT-AS1	0	ncRNA_intronic	3.497	4	2	14
rs62055493	20	17	44293205	rs2696609	43952944	0.948737	rs2696609	43952944	C	T	0.0117601	DBP	17:43952944:C:T	0.2406	MAPT-AS1	0	ncRNA_intronic	3.381	7	13	14
rs62055494	20	17	44293205	rs2696609	43953016	0.948737	rs2696609	43953016	T	C	0.0116834	DBP	17:43953016:C:T	0.2406	MAPT-AS1	0	ncRNA_intronic	2.319	7	13	14
rs62055495	20	17	44293205	rs2696609	43953043	0.948737	rs2696609	43953043	C	A	0.0117601	DBP	17:43953043:A:C	0.2406	MAPT-AS1	0	ncRNA_intronic	0.65	7	13	14
rs62055496	20	17	44293205	rs2696609	43953307	0.953951	rs2696609	43953307	T	C	0.012094	DBP	17:43953307:C:T	0.2396	MAPT-AS1	0	ncRNA_intronic	0.425	6	13	14
rs62055497	20	17	44293205	rs2696609	43953529	0.953951	rs2696609	43953529	G	A	0.0120252	DBP	17:43953529:A:G	0.2396	MAPT-AS1	0	ncRNA_intronic	1.846	6	13	14
rs62055498	20	17	44293205	rs2696609	43953814	0.953951	rs2696609	43953814	A	G	0.012094	DBP	17:43953814:A:G	0.2396	MAPT-AS1	0	ncRNA_intronic	9.124	6	7	14
rs62055500	20	17	44293205	rs2696609	43954134	0.953951	rs2696609	43954134	A	G	0.012094	DBP	17:43954134:A:G	0.2396	MAPT-AS1	0	ncRNA_intronic	16.63	5	2	14
rs62055501	20	17	44293205	rs2696609	43954227	0.953951	rs2696609	43954227	A	G	0.0121623	DBP	17:43954227:A:G	0.2396	MAPT-AS1	0	ncRNA_intronic	5.352	5	2	14
rs62055502	20	17	44293205	rs2696609	43954284	0.953951	rs2696609	43954284	A	G	0.0121623	DBP	17:43954284:A:G	0.2396	MAPT-AS1	0	ncRNA_intronic	3.377	7	2	14
rs62055515	20	17	44293205	rs2696609	43956370	0.953951	rs2696609	43956370	T	G	0.0114616	DBP	17:43956370:G:T	0.2396	MAPT-AS1	0	ncRNA_intronic	1.206	5	14	14
rs62055516	20	17	44293205	rs2696609	43956390	0.953951	rs2696609	43956390	C	T	0.0114659	DBP	17:43956390:C:T	0.2396	MAPT-AS1	0	ncRNA_intronic	2.442	7	14	14
rs62055517	20	17	44293205	rs2696609	43956425	0.953951	rs2696609	43956425	T	C	0.0114616	DBP	17:43956425:C:T	0.2396	MAPT-AS1	0	ncRNA_intronic	2.94	6	14	14
rs62055518	20	17	44293205	rs2696609	43956505	0.953951	rs2696609	43956505	C	A	0.0120252	DBP	17:43956505:A:C	0.2396	MAPT-AS1	0	ncRNA_intronic	2.271	7	14	14
rs62055525	20	17	44293205	rs2696609	43958736	0.953951	rs2696609	43958736	A	G	0.0122734	DBP	17:43958736:A:G	0.2396	MAPT-AS1	0	ncRNA_intronic	4.284	7	9	14
rs62055529	20	17	44293205	rs2696609	43960020	0.953951	rs2696609	43960020	G	A	0.0122689	DBP	17:43960020:A:G	0.2396	MAPT-AS1	0	ncRNA_intronic	4.082	6	7	14
rs62055538	20	17	44293205	rs2696609	43960997	0.953951	rs2696609	43960997	C	T	0.0123358	DBP	17:43960997:C:T	0.2396	MAPT-AS1	0	ncRNA_intronic	0.686	5	7	14
rs62055539	20	17	44293205	rs2696609	43961044	0.953951	rs2696609	43961044	G	A	0.0123358	DBP	17:43961044:A:G	0.2396	MAPT-AS1	0	ncRNA_intronic	10.28	5	7	14
rs62055540	20	17	44293205	rs2696609	43961142	0.953951	rs2696609	43961142	C	T	0.0123358	DBP	17:43961142:C:T	0.2396	MAPT-AS1	0	ncRNA_intronic	9.975	5	7	14
rs62055542	20	17	44293205	rs2696609	43963844	0.953951	rs2696609	43963844	T	C	0.0126568	DBP	17:43963844:C:T	0.2396	MAPT-AS1	0	ncRNA_intronic	0.93	4	14	14
rs62055544	20	17	44293205	rs2696609	43964539	0.948607	rs2696609	43964539	G	A	0.0120882	DBP	17:43964539:A:G	0.2406	MAPT-AS1	0	ncRNA_intronic	4.051	6	14	14
rs62055545	20	17	44293205	rs2696609	43964561	0.953951	rs2696609	43964561	T	C	0.012409	DBP	17:43964561:C:T	0.2396	MAPT-AS1	0	ncRNA_intronic	3.794	6	14	14
rs62055546	20	17	44293205	rs2696609	43964567	0.953951	rs2696609	43964567	C	A	0.0124023	DBP	17:43964567:A:C	0.2396	MAPT-AS1	0	ncRNA_intronic	1.334	6	14	14
rs62055547	20	17	44293205	rs2696609	43964755	0.953951	rs2696609	43964755	T	C	0.0126568	DBP	17:43964755:C:T	0.2396	MAPT-AS1	0	ncRNA_intronic	1.178	7	14	14
rs62055548	20	17	44293205	rs2696609	43964899	0.953951	rs2696609	43964899	G	A	0.0126568	DBP	17:43964899:A:G	0.2396	MAPT-AS1	0	ncRNA_intronic	3.995	6	14	14
rs62055550	20	17	44293205	rs2696609	43965680	0.953951	rs2696609	43965680	A	G	0.0126568	DBP	17:43965680:A:G	0.2396	MAPT-AS1	0	ncRNA_intronic	11.65	6	13	14
rs62055552	20	17	44293205	rs2696609	43965955	0.953951	rs2696609	43965955	G	A	0.0127231	DBP	17:43965955:A:G	0.2396	MAPT-AS1	0	ncRNA_intronic	0.769	5	13	14
rs62055553	20	17	44293205	rs2696609	43966178	0.953951	rs2696609	43966178	A	C	0.0127241	DBP	17:43966178:A:C	0.2396	MAPT-AS1	0	ncRNA_intronic	7.871	7	13	14
rs62055554	20	17	44293205	rs2696609	43966260	0.953951	rs2696609	43966260	G	A	0.0127231	DBP	17:43966260:A:G	0.2396	MAPT-AS1	0	ncRNA_intronic	7.444	7	13	14
rs62055555	20	17	44293205	rs2696609	43966282	0.953951	rs2696609	43966282	T	G	0.0127241	DBP	17:43966282:G:T	0.2396	MAPT-AS1	0	ncRNA_intronic	1.931	NA	13	14
rs62055556	20	17	44293205	rs2696609	43966749	0.953951	rs2696609	43966749	C	T	0.0127231	DBP	17:43966749:C:T	0.2396	MAPT-AS1	0	ncRNA_intronic	3.47	7	13	14
rs62055557	20	17	44293205	rs2696609	43966795	0.953951	rs2696609	43966795	A	C	0.0127241	DBP	17:43966795:A:C	0.2396	MAPT-AS1	0	ncRNA_intronic	2.257	6	13	14
rs62055558	20	17	44293205	rs2696609	43966955	0.953951	rs2696609	43966955	G	A	0.0127231	DBP	17:43966955:A:G	0.2396	MAPT-AS1	0	ncRNA_intronic	10.15	2b	13	14
rs62055559	20	17	44293205	rs2696609	43967138	0.953951	rs2696609	43967138	G	T	0.0125238	DBP	17:43967138:G:T	0.2396	MAPT-AS1	0	ncRNA_intronic	12.86	2b	5	14
rs62055661	20	17	44293205	rs2696609	43752039	0.953951	rs2696609	43752039	T	C	0.0142413	DBP	17:43752039:C:T	0.2396	CRHR1:RP11-105N13.4	00:00:00	ncRNA_intronic	1.834	7	5	14
rs62055662	20	17	44293205	rs2696609	43752566	0.953951	rs2696609	43752566	T	C	0.0142413	DBP	17:43752566:C:T	0.2396	CRHR1:RP11-105N13.4	00:00:00	ncRNA_intronic	4.305	5	5	14
rs62055663	20	17	44293205	rs2696609	43753454	0.953951	rs2696609	43753454	G	A	0.0142498	DBP	17:43753454:A:G	0.2396	CRHR1:RP11-105N13.4	00:00:00	ncRNA_intronic	11.5	5	5	14
rs62055664	20	17	44293205	rs2696609	43753642	0.953951	rs2696609	43753642	G	A	0.0142498	DBP	17:43753642:A:G	0.2396	CRHR1:RP11-105N13.4	00:00:00	ncRNA_intronic	7.57	7	5	14
rs62055665	20	17	44293205	rs2696609	43754505	0.953951	rs2696609	43754505	C	A	0.0142498	DBP	17:43754505:A:C	0.2396	CRHR1:RP11-105N13.4	00:00:00	ncRNA_intronic	2.571	5	5	14
rs62055689	20	17	44293205	rs2696609	43754569	0.953951	rs2696609	43754569	A	G	0.0142413	DBP	17:43754569:A:G	0.2396	CRHR1:RP11-105N13.4	00:00:00	ncRNA_intronic	1.313	7	5	14
rs62055691	20	17	44293205	rs2696609	43754850	0.953951	rs2696609	43754850	C	T	0.0140334	DBP	17:43754850:C:T	0.2396	CRHR1:RP11-105N13.4	00:00:00	ncRNA_intronic	2.998	7	5	14
rs62055693	20	17	44293205	rs2696609	43756910	0.948607	rs2696609	43756910	C	T	0.0152584	DBP	17:43756910:C:T	0.2406	CRHR1:RP11-105N13.4	00:00:00	ncRNA_intronic	15.6	4	5	14
rs62055697	20	17	44293205	rs2696609	43758148	0.953951	rs2696609	43758148	T	C	0.0134922	DBP	17:43758148:C:T	0.2396	CRHR1:RP11-105N13.4	00:00:00	ncRNA_intronic	2.759	7	5	14
rs62055698	20	17	44293205	rs2696609	43758238	0.953951	rs2696609	43758238	T	C	0.0139854	DBP	17:43758238:C:T	0.2396	CRHR1:RP11-105N13.4	00:00:00	ncRNA_intronic	1.014	7	5	14
rs62055700	20	17	44293205	rs2696609	43758742	0.953951	rs2696609	43758742	C	T	0.0139908	DBP	17:43758742:C:T	0.2396	CRHR1:RP11-105N13.4	00:00:00	ncRNA_intronic	7.59	5	5	14
rs62055701	20	17	44293205	rs2696609	43758787	0.953951	rs2696609	43758787	A	G	0.0139854	DBP	17:43758787:A:G	0.2396	CRHR1:RP11-105N13.4	00:00:00	ncRNA_intronic	3.118	5	5	14
rs62055702	20	17	44293205	rs2696609	43758790	0.953951	rs2696609	43758790	T	C	0.0139854	DBP	17:43758790:C:T	0.2396	CRHR1:RP11-105N13.4	00:00:00	ncRNA_intronic	2.717	5	5	14
rs62055704	20	17	44293205	rs2696609	43760577	0.953951	rs2696609	43760577	A	G	0.0140638	DBP	17:43760577:A:G	0.2396	CRHR1:RP11-105N13.4	00:00:00	ncRNA_intronic	2.511	7	5	14
rs62055705	20	17	44293205	rs2696609	43760599	0.953951	rs2696609	43760599	C	A	0.0139908	DBP	17:43760599:A:C	0.2396	CRHR1:RP11-105N13.4	00:00:00	ncRNA_intronic	1.564	6	5	14
rs62055706	20	17	44293205	rs2696609	43760685	0.953951	rs2696609	43760685	C	T	0.014067	DBP	17:43760685:C:T	0.2396	CRHR1:RP11-105N13.4	00:00:00	ncRNA_intronic	1.101	6	5	14
rs62055707	20	17	44293205	rs2696609	43761482	0.953951	rs2696609	43761482	C	T	0.0138721	DBP	17:43761482:C:T	0.2396	CRHR1:RP11-105N13.4	00:00:00	ncRNA_intronic	2.944	5	5	14
rs62055708	20	17	44293205	rs2696609	43761974	0.953951	rs2696609	43761974	A	C	0.0138766	DBP	17:43761974:A:C	0.2396	CRHR1:RP11-105N13.4	00:00:00	ncRNA_intronic	3.436	5	5	14
rs62055709	20	17	44293205	rs2696609	43762429	0.953951	rs2696609	43762429	T	C	0.0143421	DBP	17:43762429:C:T	0.2396	CRHR1:RP11-105N13.4	00:00:00	ncRNA_intronic	2.532	6	5	14
rs62055711	20	17	44293205	rs2696609	43762554	0.953951	rs2696609	43762554	G	A	0.0138721	DBP	17:43762554:A:G	0.2396	CRHR1:RP11-105N13.4	00:00:00	ncRNA_intronic	5.85	7	5	14
rs62055712	20	17	44293205	rs2696609	43764565	0.953951	rs2696609	43764565	G	A	0.0138721	DBP	17:43764565:A:G	0.2396	CRHR1:RP11-105N13.4	00:00:00	ncRNA_intronic	2.833	6	5	14
rs62055713	20	17	44293205	rs2696609	43764685	0.953951	rs2696609	43764685	T	C	0.0138766	DBP	17:43764685:C:T	0.2396	CRHR1:RP11-105N13.4	00:00:00	ncRNA_intronic	4.525	7	5	14
rs62055714	20	17	44293205	rs2696609	43764796	0.948737	rs2696609	43764796	T	G	0.0141082	DBP	17:43764796:G:T	0.2406	CRHR1:RP11-105N13.4	00:00:00	ncRNA_intronic	13.3	5	5	14
rs62055715	20	17	44293205	rs2696609	43764847	0.953951	rs2696609	43764847	A	G	0.0138766	DBP	17:43764847:A:G	0.2396	CRHR1:RP11-105N13.4	00:00:00	ncRNA_intronic	16.56	5	5	14
rs62055716	20	17	44293205	rs2696609	43765778	0.953951	rs2696609	43765778	T	C	0.0138766	DBP	17:43765778:C:T	0.2396	CRHR1:RP11-105N13.4	00:00:00	ncRNA_intronic	1.355	4	7	14
rs62055717	20	17	44293205	rs2696609	43766415	0.948973	rs2696609	43766415	G	A	0.0153258	DBP	17:43766415:A:G	0.2386	CRHR1:RP11-105N13.4	00:00:00	ncRNA_intronic	6.551	5	7	14
rs62055718	20	17	44293205	rs2696609	43766418	0.948973	rs2696609	43766418	T	C	0.0158227	DBP	17:43766418:C:T	0.2386	CRHR1:RP11-105N13.4	00:00:00	ncRNA_intronic	3.548	5	7	14
rs62055751	20	17	44293205	rs2696609	43767538	0.953951	rs2696609	43767538	G	A	0.0141395	DBP	17:43767538:A:G	0.2396	CRHR1:RP11-105N13.4	00:00:00	ncRNA_intronic	9.397	5	7	14
rs62055752	20	17	44293205	rs2696609	43767628	0.953951	rs2696609	43767628	A	G	0.0138045	DBP	17:43767628:A:G	0.2396	CRHR1:RP11-105N13.4	00:00:00	ncRNA_intronic	0.699	5	7	13
rs62055753	20	17	44293205	rs2696609	43767631	0.953951	rs2696609	43767631	A	G	0.0138045	DBP	17:43767631:A:G	0.2396	CRHR1:RP11-105N13.4	00:00:00	ncRNA_intronic	1.134	5	7	13
rs62055868	20	17	44293205	rs2696609	43830640	0.953951	rs2696609	43830640	T	C	0.0109091	DBP	17:43830640:C:T	0.2396	CRHR1:RP11-105N13.4	00:00:00	ncRNA_intronic	0.716	5	5	14
rs62055869	20	17	44293205	rs2696609	43830685	0.953951	rs2696609	43830685	A	G	0.0116687	DBP	17:43830685:A:G	0.2396	CRHR1:RP11-105N13.4	00:00:00	ncRNA_intronic	2.147	5	5	14
rs62055871	20	17	44293205	rs2696609	43831112	0.953951	rs2696609	43831112	A	G	0.0119132	DBP	17:43831112:A:G	0.2396	CRHR1:RP11-105N13.4	00:00:00	ncRNA_intronic	0.89	2b	5	14
rs62055875	20	17	44293205	rs2696609	43832864	0.953951	rs2696609	43832864	C	T	0.0119841	DBP	17:43832864:C:T	0.2396	CRHR1:RP11-105N13.4	00:00:00	ncRNA_intronic	6.448	5	5	14
rs62055876	20	17	44293205	rs2696609	43832940	0.948607	rs2696609	43832940	G	A	0.0115131	DBP	17:43832940:A:G	0.2406	CRHR1:RP11-105N13.4	00:00:00	ncRNA_intronic	2.028	7	5	14
rs62055878	20	17	44293205	rs2696609	43835854	0.953951	rs2696609	43835854	A	C	0.012485	DBP	17:43835854:A:C	0.2396	CRHR1:RP11-105N13.4	00:00:00	ncRNA_intronic	14.24	5	5	14
rs62055884	20	17	44293205	rs2696609	43837567	0.953951	rs2696609	43837567	T	C	0.0125171	DBP	17:43837567:C:T	0.2396	CRHR1:RP11-105N13.4	00:00:00	ncRNA_intronic	11.56	5	5	14
rs62055885	20	17	44293205	rs2696609	43838014	0.953951	rs2696609	43838014	G	A	0.0130316	DBP	17:43838014:A:G	0.2396	CRHR1:RP11-105N13.4	00:00:00	ncRNA_intronic	4.008	6	5	14
rs62055886	20	17	44293205	rs2696609	43838678	0.953951	rs2696609	43838678	A	G	0.0129285	DBP	17:43838678:A:G	0.2396	CRHR1:RP11-105N13.4	00:00:00	ncRNA_intronic	0.27	7	5	14
rs62055887	20	17	44293205	rs2696609	43838710	0.953951	rs2696609	43838710	C	T	0.0128627	DBP	17:43838710:C:T	0.2396	CRHR1:RP11-105N13.4	00:00:00	ncRNA_intronic	3.077	7	5	14
rs62055888	20	17	44293205	rs2696609	43838720	0.938913	rs2696609	43838720	T	C	0.0151025	DBP	17:43838720:C:T	0.2366	CRHR1:RP11-105N13.4	00:00:00	ncRNA_intronic	3.328	7	5	14
rs62055889	20	17	44293205	rs2696609	43838919	0.953951	rs2696609	43838919	A	G	0.0129285	DBP	17:43838919:A:G	0.2396	CRHR1:RP11-105N13.4	00:00:00	ncRNA_intronic	0.625	6	5	14
rs62055890	20	17	44293205	rs2696609	43840681	0.953951	rs2696609	43840681	T	C	0.0136906	DBP	17:43840681:C:T	0.2396	CRHR1:RP11-105N13.4	00:00:00	ncRNA_intronic	1.147	4	5	14
rs62055893	20	17	44293205	rs2696609	43842494	0.953951	rs2696609	43842494	G	A	0.0137776	DBP	17:43842494:A:G	0.2396	CRHR1:RP11-105N13.4	00:00:00	ncRNA_intronic	2.131	6	5	14
rs62055894	20	17	44293205	rs2696609	43843943	0.953951	rs2696609	43843943	A	G	0.0129781	DBP	17:43843943:A:G	0.2396	CRHR1:RP11-105N13.4	00:00:00	ncRNA_intronic	4.708	6	5	14
rs62055895	20	17	44293205	rs2696609	43844044	0.953951	rs2696609	43844044	G	A	0.0129739	DBP	17:43844044:A:G	0.2396	CRHR1:RP11-105N13.4	00:00:00	ncRNA_intronic	0.772	5	5	14
rs62055896	20	17	44293205	rs2696609	43844201	0.953951	rs2696609	43844201	T	C	0.0129781	DBP	17:43844201:C:T	0.2396	CRHR1:RP11-105N13.4	00:00:00	ncRNA_intronic	1.073	5	5	14
rs62055901	20	17	44293205	rs2696609	43845041	0.953951	rs2696609	43845041	A	G	0.0129781	DBP	17:43845041:A:G	0.2396	CRHR1:RP11-105N13.4	00:00:00	ncRNA_intronic	6.579	7	5	14
rs62055903	20	17	44293205	rs2696609	43846668	0.953951	rs2696609	43846668	A	C	0.0130452	DBP	17:43846668:A:C	0.2396	CRHR1:RP11-105N13.4	00:00:00	ncRNA_intronic	2.391	7	5	14
rs62055928	20	17	44293205	rs2696609	43847374	0.953951	rs2696609	43847374	A	G	0.0131066	DBP	17:43847374:A:G	0.2396	CRHR1:RP11-105N13.4	00:00:00	ncRNA_intronic	5.934	5	5	14
rs62055932	20	17	44293205	rs2696609	43848412	0.953951	rs2696609	43848412	G	A	0.0110853	DBP	17:43848412:A:G	0.2396	CRHR1:RP11-105N13.4	00:00:00	ncRNA_intronic	6.698	5	2	14
rs62055933	20	17	44293205	rs2696609	43848461	0.953951	rs2696609	43848461	A	G	0.0133339	DBP	17:43848461:A:G	0.2396	CRHR1:RP11-105N13.4	00:00:00	ncRNA_intronic	9.334	5	2	14
rs62055935	20	17	44293205	rs2696609	43848750	0.953951	rs2696609	43848750	C	T	0.0131789	DBP	17:43848750:C:T	0.2396	CRHR1:RP11-105N13.4	00:00:00	ncRNA_intronic	4.092	5	2	14
rs62055937	20	17	44293205	rs2696609	43848968	0.953951	rs2696609	43848968	T	G	0.0131748	DBP	17:43848968:G:T	0.2396	CRHR1:RP11-105N13.4	00:00:00	ncRNA_intronic	0.746	5	2	14
rs62055938	20	17	44293205	rs2696609	43849656	0.953951	rs2696609	43849656	A	C	0.0131066	DBP	17:43849656:A:C	0.2396	CRHR1:RP11-105N13.4	00:00:00	ncRNA_intronic	2.093	5	5	14
rs62055940	20	17	44293205	rs2696609	43849896	0.953951	rs2696609	43849896	G	A	0.0131128	DBP	17:43849896:A:G	0.2396	CRHR1:RP11-105N13.4	00:00:00	ncRNA_intronic	4.504	7	5	14
rs62055942	20	17	44293205	rs2696609	43850966	0.953951	rs2696609	43850966	G	A	0.01304	DBP	17:43850966:A:G	0.2396	CRHR1:RP11-105N13.4	00:00:00	ncRNA_intronic	0.204	7	5	14
rs62055943	20	17	44293205	rs2696609	43851018	0.953951	rs2696609	43851018	C	T	0.0129739	DBP	17:43851018:C:T	0.2396	CRHR1:RP11-105N13.4	00:00:00	ncRNA_intronic	4.564	6	5	14
rs62055945	20	17	44293205	rs2696609	43851851	0.953951	rs2696609	43851851	A	G	0.0129781	DBP	17:43851851:A:G	0.2396	CRHR1:RP11-105N13.4	00:00:00	ncRNA_intronic	4.038	7	5	14
rs62055946	20	17	44293205	rs2696609	43851971	0.953951	rs2696609	43851971	A	C	0.0129781	DBP	17:43851971:A:C	0.2396	CRHR1:RP11-105N13.4	00:00:00	ncRNA_intronic	2.041	5	5	14
rs62055947	20	17	44293205	rs2696609	43852605	0.953951	rs2696609	43852605	T	C	0.0129781	DBP	17:43852605:C:T	0.2396	CRHR1:RP11-105N13.4	00:00:00	ncRNA_intronic	0.602	5	5	14
rs62055948	20	17	44293205	rs2696609	43852621	0.953951	rs2696609	43852621	C	T	0.0129739	DBP	17:43852621:C:T	0.2396	CRHR1:RP11-105N13.4	00:00:00	ncRNA_intronic	6.012	5	5	14
rs62055950	20	17	44293205	rs2696609	43853133	0.953951	rs2696609	43853133	C	T	0.0129739	DBP	17:43853133:C:T	0.2396	CRHR1:RP11-105N13.4	00:00:00	ncRNA_intronic	3.573	2a	5	14
rs62055955	20	17	44293205	rs2696609	43854340	0.948737	rs2696609	43854340	G	A	0.0129296	DBP	17:43854340:A:G	0.2406	CRHR1:RP11-105N13.4	00:00:00	ncRNA_intronic	4.012	5	5	14
rs62055956	20	17	44293205	rs2696609	43854449	0.948737	rs2696609	43854449	T	C	0.0129105	DBP	17:43854449:C:T	0.2406	CRHR1:RP11-105N13.4	00:00:00	ncRNA_intronic	5.008	7	5	14
rs62055957	20	17	44293205	rs2696609	43854536	0.948737	rs2696609	43854536	A	C	0.0129105	DBP	17:43854536:A:C	0.2406	CRHR1:RP11-105N13.4	00:00:00	ncRNA_intronic	2.667	6	5	14
rs62056760	20	17	44293205	rs2696609	43968572	0.953951	rs2696609	43968572	A	G	0.0127241	DBP	17:43968572:A:G	0.2396	MAPT-AS1	0	ncRNA_intronic	5.099	7	5	14
rs62056773	20	17	44293205	rs2696609	43969833	0.953951	rs2696609	43969833	G	A	0.0126568	DBP	17:43969833:A:G	0.2396	MAPT-AS1	0	ncRNA_intronic	4.145	6	5	14
rs62056774	20	17	44293205	rs2696609	43969901	0.953951	rs2696609	43969901	A	G	0.0126568	DBP	17:43969901:A:G	0.2396	MAPT-AS1	0	ncRNA_intronic	3.374	7	5	14
rs62056775	20	17	44293205	rs2696609	43969952	0.953951	rs2696609	43969952	C	T	0.0126568	DBP	17:43969952:C:T	0.2396	MAPT-AS1	0	ncRNA_intronic	4.478	7	5	14
rs62056776	20	17	44293205	rs2696609	43969995	0.953951	rs2696609	43969995	T	C	0.0126568	DBP	17:43969995:C:T	0.2396	MAPT-AS1	0	ncRNA_intronic	2.208	6	5	14
rs62056777	20	17	44293205	rs2696609	43970303	0.953951	rs2696609	43970303	A	G	0.0128189	DBP	17:43970303:A:G	0.2396	MAPT-AS1	0	ncRNA_intronic	10.94	6	5	14
rs62056779	20	17	44293205	rs2696609	43971937	0.953951	rs2696609	43971937	A	C	0.0127512	DBP	17:43971937:A:C	0.2396	MAPT-AS1:MAPT	00:00:00	ncRNA_intronic	16.3	2b	1	1
rs62056780	20	17	44293205	rs2696609	43973652	0.953951	rs2696609	43973652	T	C	0.0127512	DBP	17:43973652:C:T	0.2396	MAPT	0	intronic	9.924	3a	1	13
rs62056781	20	17	44293205	rs2696609	43973899	0.953951	rs2696609	43973899	C	T	0.0127598	DBP	17:43973899:C:T	0.2396	MAPT	0	intronic	9.122	2b	1	13
rs62056782	20	17	44293205	rs2696609	43974230	0.953951	rs2696609	43974230	T	C	0.0127512	DBP	17:43974230:C:T	0.2396	MAPT	0	intronic	8.48	4	1	13
rs62056785	20	17	44293205	rs2696609	43975263	0.953951	rs2696609	43975263	C	T	0.0124202	DBP	17:43975263:C:T	0.2396	MAPT	0	intronic	10.38	2b	1	13
rs62056786	20	17	44293205	rs2696609	43975285	0.953951	rs2696609	43975285	C	T	0.0124202	DBP	17:43975285:C:T	0.2396	MAPT	0	intronic	11.85	2b	1	13
rs62056789	20	17	44293205	rs2696609	43975415	0.953951	rs2696609	43975415	C	A	0.0124202	DBP	17:43975415:A:C	0.2396	MAPT	0	intronic	4.374	2b	2	13
rs62056790	20	17	44293205	rs2696609	43975417	0.953951	rs2696609	43975417	A	G	0.0124169	DBP	17:43975417:A:G	0.2396	MAPT	0	intronic	6.993	2b	2	13
rs62056791	20	17	44293205	rs2696609	43976064	0.953951	rs2696609	43976064	C	T	0.0122197	DBP	17:43976064:C:T	0.2396	MAPT	0	intronic	3.128	5	5	13
rs62056792	20	17	44293205	rs2696609	43976644	0.953951	rs2696609	43976644	A	G	0.012145	DBP	17:43976644:A:G	0.2396	MAPT	0	intronic	11.16	5	5	13
rs62056793	20	17	44293205	rs2696609	43977018	0.953951	rs2696609	43977018	G	A	0.01208	DBP	17:43977018:A:G	0.2396	MAPT	0	intronic	7.979	4	5	13
rs62056794	20	17	44293205	rs2696609	43977049	0.953951	rs2696609	43977049	G	A	0.0117457	DBP	17:43977049:A:G	0.2396	MAPT	0	intronic	3.273	4	5	13
rs62056795	20	17	44293205	rs2696609	43978041	0.953951	rs2696609	43978041	T	C	0.0120765	DBP	17:43978041:C:T	0.2396	MAPT	0	intronic	9.474	5	2	13
rs62056796	20	17	44293205	rs2696609	43978120	0.953951	rs2696609	43978120	G	A	0.01208	DBP	17:43978120:A:G	0.2396	MAPT	0	intronic	5.516	5	2	13
rs62056801	20	17	44293205	rs2696609	43979504	0.953951	rs2696609	43979504	A	G	0.0123245	DBP	17:43979504:A:G	0.2396	MAPT	0	intronic	1.184	6	5	14
rs62056802	20	17	44293205	rs2696609	43980762	0.953951	rs2696609	43980762	G	A	0.0123234	DBP	17:43980762:A:G	0.2396	MAPT	0	intronic	9.749	5	2	14
rs62056803	20	17	44293205	rs2696609	43982159	0.953951	rs2696609	43982159	G	A	0.0123234	DBP	17:43982159:A:G	0.2396	MAPT	0	intronic	3.817	7	5	14
rs62056804	20	17	44293205	rs2696609	43982286	0.953951	rs2696609	43982286	T	C	0.0123245	DBP	17:43982286:C:T	0.2396	MAPT	0	intronic	1.171	5	5	14
rs62056805	20	17	44293205	rs2696609	43983363	0.953951	rs2696609	43983363	A	G	0.0123922	DBP	17:43983363:A:G	0.2396	MAPT	0	intronic	0.444	2b	2	14
rs62056806	20	17	44293205	rs2696609	43983801	0.953951	rs2696609	43983801	G	A	0.0123899	DBP	17:43983801:A:G	0.2396	MAPT	0	intronic	4.998	5	2	13
rs62056808	20	17	44293205	rs2696609	43984646	0.953951	rs2696609	43984646	C	T	0.0123899	DBP	17:43984646:C:T	0.2396	MAPT	0	intronic	8.392	5	2	14
rs62056809	20	17	44293205	rs2696609	43984669	0.953951	rs2696609	43984669	G	A	0.0123899	DBP	17:43984669:A:G	0.2396	MAPT	0	intronic	5.703	5	2	14
rs62056810	20	17	44293205	rs2696609	43984672	0.953951	rs2696609	43984672	C	T	0.0123899	DBP	17:43984672:C:T	0.2396	MAPT	0	intronic	5.629	5	2	14
rs62056811	20	17	44293205	rs2696609	43985247	0.948607	rs2696609	43985247	T	C	0.0124359	DBP	17:43985247:C:T	0.2406	MAPT:RP11-669E14.4	00:00:00	ncRNA_exonic	6.367	5	2	14
rs62056812	20	17	44293205	rs2696609	43987154	0.953951	rs2696609	43987154	A	G	0.0124605	DBP	17:43987154:A:G	0.2396	MAPT:RP11-669E14.4	00:00:00	ncRNA_intronic	2.139	7	5	14
rs62056835	20	17	44293205	rs2696609	43988623	0.948607	rs2696609	43988623	A	G	0.0110263	DBP	17:43988623:A:G	0.2406	MAPT	0	intronic	0.361	6	5	14
rs62056837	20	17	44293205	rs2696609	43988884	0.953951	rs2696609	43988884	C	T	0.0122871	DBP	17:43988884:C:T	0.2396	MAPT	0	intronic	3.916	7	5	14
rs62056838	20	17	44293205	rs2696609	43989087	0.953951	rs2696609	43989087	G	A	0.0122871	DBP	17:43989087:A:G	0.2396	MAPT	0	intronic	0.815	6	5	14
rs62056839	20	17	44293205	rs2696609	43989221	0.953951	rs2696609	43989221	C	T	0.0122871	DBP	17:43989221:C:T	0.2396	MAPT	0	intronic	4.549	6	5	14
rs62056840	20	17	44293205	rs2696609	43989689	0.953951	rs2696609	43989689	C	T	0.0123539	DBP	17:43989689:C:T	0.2396	MAPT	0	intronic	6.879	7	4	9
rs62056841	20	17	44293205	rs2696609	43990041	0.953951	rs2696609	43990041	C	A	0.0123539	DBP	17:43990041:A:C	0.2396	MAPT	0	intronic	0.24	5	4	9
rs62056848	20	17	44293205	rs2696609	43992456	0.953951	rs2696609	43992456	A	G	0.0120088	DBP	17:43992456:A:G	0.2396	MAPT	0	intronic	9.372	5	4	14
rs62056850	20	17	44293205	rs2696609	43992581	0.948607	rs2696609	43992581	T	C	0.0112917	DBP	17:43992581:C:T	0.2406	MAPT	0	intronic	0.329	4	4	14
[truncated: 5,625 more rows]
